# Supplementary material for: Suppression of ischemia in arterial occlusive disease by JNK-promoted native collateral artery development
Source: eLife. 2016 Aug 9;5:e18414. doi: 10.7554/eLife.18414 (PMC4999312; doi:10.7554/eLife.18414)
Supplement: Figure 1—figure supplement 1—source data 1. — This file contains raw source data used to make the graphs presented in Figure 1—figure supplement 1. DOI: http://dx.doi.org/10.7554/eLife.18414.006 [file elife-18414-fig1-figsupp1-data1.xlsx]

## Sheet: Pannel A
	Body Mass (g)
		P0					P6
	Mouse ID	EfCtrl	E3KO	Mouse ID		Mouse ID	EfCtrl	E3KO	Mouse ID
	1	1.54	1.501	1		1	3.716	3.061	1
	2	1.388	1.308	2		2	3.274	2.448	2
	3	1.351	1.342	3		3	3.081	3.211	3
	4	1.41	1.251	4		4	3.073	2.828	4
	5	1.248	1.37	5		5	3.48	2.936	5
	6	1.323	1.275	6		6	2.615	2.687	6
	7	1.536	1.28	7		7	3.32	3.151	7
	8	1.534	1.115	8		8	3.522	3.546	8
	9	1.712	1.435	9		9	3.307	3.304	9
	10	1.585	1.526	10		10	2.948	3.594	10
	11	1.325	1.561	11		11	3.185	2.859	11
	12	1.45	1.335	12		12	2.69	3.09	12
						13	2.566	3.47	13
						14	2.195	3.072	14
						15	3.111	2.796	15
						16	2.662	3.196	16
						17	3.018	3.002	17
						18	2.867	2.435	18
						19	2.771	2.596	19
						20	3.413	3.109	20
						21	2.645	3.06	21
								3.151	22
								2.843	23
	Body Mass (g) Averages
		EfCtrl	E3KO
	P0	1.45017	1.35825
	P6	3.02186	3.01935
		SEM	SEM
		0.0386538	0.0372044
		0.0831002	0.0647529
		TTEST
		0.100721
		0.980932

## Sheet: Pannel B
	Body Mass (g)
	Mouse ID	ECtrl		Mouse ID	EfCtrl		Mouse ID	E3KO
	1	27.4		1	23.1		1	27
	2	25.3		2	23.8		2	21.9
	3	26.4		3	28.8		3	21.9
	4	26.2		4	25		4	24.7
	5	25.9		5	28.1		5	22.6
	6	27.3		6	26.2		6	22
	7	28.9		7	27.6		7	23
	8	27.5		8	25.9		8	25.6
	9	26.2		9	27		9	24.2
	10	29		10	26.8		10	22.1
	Body Mass (g) Averages
	ECtrl	EfCtrl	E3KO
	27.01	26.23	23.5
	SEM	SEM	SEM
	0.392273	0.579473	0.56745
	Ttest	Ttest	Ttest
	7.67468e-05	0.279656	0.00344066
	ECtrl vs. E3KO	ECtrl vs. EfCtrl	ECtrl vs. E3KO

## Sheet: Pannel C
		Genotype	Start 9-11 Weeks Old
		Mouse ID	Body Mass (g)
		EWT	Week 0	Week 2	Week 4	Week 6	Week 8	Week 10	Week 12	Week 14	Week 16
		1	25	25.9	25.6	26.7	27	28.4	28.7	29.4	29.5
		2	27.9	28.7	29.5	30.1	30.1	32.6	32.7	33.2	33.4
		3	26.3	27.6	28.5	28.4	28.7	29.6	29.6	29.7	29.8
		4	25.2	26.7	28.3	29.6	30.1	31.5	31.8	32.3	32.4
		5	20.6	22.1	26.3	26.1	26.6	27.2	27.6	27.8	28.3
		6	26.4	28.4	29.3	30.4	30.3	34.4	34	33	33.3
		7	24.3	26.7	27.2	28.4	29.2	29.5	31.1	31.8	32.1
		8	23.6	25.6	26.3	27.2	27.8	30.1	30.1	30.1	30.6
		9	24.9	25.5	26.8	27	27.9	28.6	29.2	29.2	29.4
		10	23.9	25.5	26.5	26.6	28.5	28.8	29.2	29.2	30.2
		EfCtrl	Week 0	Week 2	Week 4	Week 6	Week 8	Week 10	Week 12	Week 14	Week 16
		1	24	27	27.6	27	27.3	28.8	28.7	29.2	28.8
		2	23	24.5	24.9	25.9	25.7	26.8	27	27.5	28.4
		3	24.4	25.9	24.9	25.1	26.4	26.6	26.6	26.7	27.6
		4	24.8	26.5	27.2	27.6	28	29.4	29.4	29.7	31.3
		5	25.7	27.1	28.2	28.9	29.1	30.8	30.8	31.1	30.2
		6	27.4	28.9	29.9	30.7	30.6	31.3	31.2	31.6	32.2
		7	23.7	25.1	25.6	26.2	27.2	27.2	28.2	27.9	28.9
		8	21.1	21.9	22.3	22.8	24.3	24.4	24.5	24.8	24.5
		9	24.7	25.7	26.6	27.6	28.5	29.8	30.5	30.8	30.9
		10	23.2	25	25.5	26.5	27.7	28.1	29.8	30.2	30.5
		E2KO	Week 0	Week 2	Week 4	Week 6	Week 8	Week 10	Week 12	Week 14	Week 16
		1	24	26.1	26.5	26.6	26.2	27.3	27.6	28.1	28.1
		2	26.5	28.1	28.2	27.7	28.5	28.4	28.5	29.6	29.5
		3	22.6	23.9	25.4	25.6	26	27.3	27.9	27.8	28.6
		4	22.4	24.6	26	26	26.7	27.8	28.5	28.8	28.9
		5	23.2	24.4	25.3	25.7	26.5	27.3	26.7	26.9	27.6
		6	19.7	21.3	22	23.1	23.2	24.4	24.1	24.7	25.2
		7	20.4	22.2	22.8	23.8	23.9	25.2	25.2	25.3	25.8
			Body Mass (g) Averages
		Week	0	2	4	6	8	10	12	14	16
		EWT	24.81	26.27	27.43	28.05	28.62	30.07	30.4	30.57	30.9
		EfCtrl	24.2	25.76	26.27	26.83	27.48	28.32	28.67	28.95	29.33
		E2KO	22.6857	24.3714	25.1714	25.5	25.8571	26.8143	26.9286	27.3143	27.6714
			SEM	SEM	SEM	SEM	SEM	SEM	SEM	SEM	SEM
		EWT	0.621548	0.593867	0.433346	0.49357	0.414407	0.687516	0.623966	0.587849	0.562336
		EfCtrl	0.532082	0.589388	0.66834	0.675615	0.560516	0.671284	0.673144	0.689162	0.702068
		E2KO	0.855912	0.863469	0.807322	0.597614	0.675016	0.548343	0.643175	0.678734	0.607773
			Ttest	Ttest	Ttest	Ttest	Ttest	Ttest	Ttest	Ttest	Ttest
		EWT vs. E2KO	0.0569507	0.0798114	0.0175618	0.00487891	0.00217549	0.00361001	0.00185972	0.00261296	0.00165193
		EWT vs. EfCtrl	0.465565	0.549783	0.162529	0.162038	0.119329	0.0852346	0.0757036	0.090551	0.0979639
		EfCtrl vs. E2KO	0.13341	0.187956	0.310218	0.183102	0.0837707	0.125493	0.092883	0.123623	0.112765
