# Supplementary material for: Suppression of ischemia in arterial occlusive disease by JNK-promoted native collateral artery development
Source: eLife. 2016 Aug 9;5:e18414. doi: 10.7554/eLife.18414 (PMC4999312; doi:10.7554/eLife.18414)
Supplement: Figure 1—figure supplement 2—source data 1. — This file contains raw source data used to make the graphs presented in Figure 1—figure supplement 2. DOI: http://dx.doi.org/10.7554/eLife.18414.008 [file elife-18414-fig1-figsupp2-data1.xlsx]

## Sheet: Panel C
			Peripheral Blood Analysis
		Mouse ID	WBC	RBC	HGB	HCT	MCV	MCH	MCHC	RDW	MPV	PLT
	ECtrl	1	12.4	10.56	16.3	44	41.7	15.4	37.1	20.6	6.5	1152
		2	13.2	10.48	16.2	43.5	41.5	15.4	37.2	19.8	6.4	1098
		3	13.9	10.92	16.7	45.8	41.9	15.3	36.5	20.5	6.2	1021
		4	12	10.68	16	43.6	40.8	15	36.8	20.2	6.5	1082
		5	14.4	10.4	15.9	43.3	41.6	15.3	36.8	20.5	6.4	1088
		6	11	10.26	16.1	43.3	42.2	15.7	37.2	19.7	6.3	1107
		7	10.5	10.95	17	46.5	42.4	15.5	36.5	19.8	6.5	1026
		8	11.7	11.51	17.6	47.7	41.4	15.3	37	19.6	6.5	1159
		9	14	10.94	17.1	46.6	42.5	15.6	36.8	21.2	6.8	1365
		10	10.5	10.57	16	43.2	40.8	15.1	37.1	19.6	6.5	1215
		11	14.6	9.84	14.9	39.5	40.1	15.1	37.6	20	6.7	1250
		12	8.2	9.9	15.6	42.1	42.4	15.8	37.2	20.5	6.9	919
		13	14.8	10.77	16.6	45.5	42.3	15.4	36.4	19.4	6.4	1142
		14	15.5	10.07	15.8	42.7	42.4	15.7	36.9	20.9	6.7	1255
		15	13.9	10.51	16.5	44.6	42.4	15.7	37	20	6.5	1174
	EfCtrl	1	11.8	10.39	16.1	44.4	42.7	15.5	36.3	19.7	6.2	968
		2	12	10.16	15.7	42.5	41.8	15.4	37	20.4	6.4	1086
		3	10.5	10.24	16.5	45.5	44.4	16.1	36.3	19.8	6.3	965
		4	12.6	9.61	15.6	42.3	44	16.2	36.8	19.7	6.3	935
		5	15.5	10.88	16.8	46.1	42.4	15.4	36.4	19.7	6.1	1026
		6	11.4	9.85	15.6	42.8	43.4	15.9	36.6	20.7	6.4	1046
		7	10.6	9.93	15.7	43	43.3	15.8	36.5	20.7	6.2	981
		8	13.4	9.88	15.8	43.3	43.9	16	36.5	19.3	6.3	936
		9	12.9	9.8	15.5	42.2	43	15.8	36.7	12.4	6.5	1075
		10	16.1	10.34	16.4	44.1	42.6	15.8	37.1	19.8	6.5	1057
		11	9.2	9.44	14.5	40.5	42.9	15.4	35.9	20.8	6.5	1008
		12	13.8	10.25	15.8	43.8	42.7	15.4	36.2	20.7	6.6	1196
		13	12.4	9.93	15.6	42.6	42.9	15.7	36.6	21.6	6.7	1131
		14	14.1	10.52	16.3	45.3	43	15.5	36	20.3	6.5	1097
		15	13.2	11.22	17.6	48.3	43	15.7	36.5	19.8	6.5	1084
	E3KO	1	12.8	9.9	15.9	42.4	42.9	16	37.4	19.8	6.2	1009
		2	14.4	9.78	15.8	43.1	44	16.1	36.7	18.7	6.3	996
		3	12.5	10.26	15.6	42.7	41.6	15.2	36.6	19.4	6.3	1044
		4	18	10.34	16	44.8	43.3	15.5	35.8	20	6.4	1098
		5	15.4	10.94	17	47.4	43.3	15.5	35.8	19.4	6.4	1035
		6	12.9	9.43	14.7	40.9	43.4	15.6	35.9	20.1	6.4	1011
		7	12.6	10.44	16.4	44.6	42.7	15.7	36.8	20	6.4	1008
		8	13.4	10.1	15.5	42.9	42.4	15.3	36.2	20.4	6.5	1090
		9	12.1	9.4	14.8	39.8	42.3	15.8	37.3	20.3	6.3	1187
		10	14.4	9.68	15.2	41.1	42.5	15.7	37	20	6.5	1245
		11	9.3	10.25	15.9	43.4	42.3	15.5	36.7	20	6.7	1190
		12	16.4	10.41	16.3	44.8	43	15.7	36.5	20.5	6.4	1150
		13	21.8	9.52	15.3	41.5	43.6	16	36.8	19.8	6.4	1134
		14	17.7	9.44	14.9	39.9	42.2	15.8	37.5	19.6	6.4	1144
		15	13	9.52	14.9	40	42	15.6	37.2	20.1	6.6	1078
			Averages
			WBC	RBC	HGB	HCT	MCV	MCH	MCHC	RDW	MPV	PLT
		ECtrl	12.7067	10.5573	16.2867	44.1267	41.76	15.42	36.94	20.1533	6.52	1136.87
		EfCtrl	12.6333	10.1627	15.9667	43.78	43.0667	15.7067	36.4933	19.6933	6.4	1039.4
		E3KO	14.4467	9.96067	15.6133	42.62	42.7667	15.6667	36.68	19.8733	6.41333	1094.6
			SEM	SEM	SEM	SEM	SEM	SEM	SEM	SEM	SEM	SEM
			0.525399	0.113509	0.171788	0.534029	0.189184	0.063396	0.0826928	0.13623	0.0480079	28.2853
			0.47746	0.12154	0.181703	0.496866	0.17062	0.0693278	0.085894	0.544012	0.0425385	19.3727
			0.785273	0.121457	0.171233	0.560544	0.171455	0.0652225	0.144815	0.118107	0.0321702	20.1518
			Ttest	Ttest	Ttest	Ttest	Ttest	Ttest	Ttest	Ttest	Ttest	Ttest
	ECtrl vs. E3KO		0.0761495	0.00124923	0.0096984	0.0617448	0.000489764	0.0113036	0.130203	0.131661	0.0755253	0.233756
	ECtrl vs. EfCtrl		0.918465	0.0247353	0.211145	0.638289	1.94887e-05	0.00494373	0.000826168	0.419006	0.0718542	0.00825239
	EfCtrl vs. E3KO		0.0761495	0.00124923	0.0096984	0.0617448	0.000489764	0.0113036	0.130203	0.131661	0.0755253	0.233756

## Sheet: Panel D
		Event Counts in Indicated Gates
	Mouse ID	FSC-A, FSC-H subset	CD45.2+	CD11b+ and GR-1+ or -	CD11b+ GR-1+	CD11b+ GR-1-	CD11b-	CD3+	CD4+	CD8+	CD19+
EWT	1	167162	164759	50787	34451	16336	109724	44635	26908	16290	61336
	2	109719	106814	35968	20908	15060	64331	21566	13375	7357	37303
	3	111721	108895	45151	31387	13764	59353	21934	13303	7946	33083
	4	172668	169857	64493	48539	15954	98819	40667	25647	13622	51387
	5	133084	130280	44695	26549	18146	78974	37606	24134	11903	38559
	6	163409	159329	56615	35191	21424	96396	38857	23241	14074	53253
	7	132047	129063	38684	28437	10247	84385	32129	20706	9958	44633
	8	161942	158034	54006	38517	15489	98213	38616	23853	13595	53874
ECtrl	1	163495	160810	40673	28395	12278	115352	44859	28409	15254	66670
	2	121838	119983	55841	43471	12370	60407	21812	13475	7477	35641
	3	170282	166236	78994	65039	13955	83067	29866	18516	10511	50558
	4	109316	103466	27320	17385	9935	72605	23906	14398	8982	46456
	5	157732	154245	52366	34238	18128	97032	37276	23262	12979	56304
	6	162622	158923	70297	52130	18167	82186	29101	18325	9630	48498
	7	159920	155183	48782	33343	15439	99794	40060	24640	14025	54116
	8	155484	149898	65678	46496	19182	77885	27457	16880	9599	46239
	9	166551	164005	84882	71096	13786	73518	30289	18104	11170	39746
EfCtrl	1	158677	156481	61888	50925	10963	91051	39116	24199	13824	49677
	2	94208	92502	39478	29104	10374	49667	17875	11075	6096	29285
	3	165611	163116	66211	57140	9071	93166	36948	22305	13916	53624
	4	165936	161988	83834	75404	8430	73316	29199	18114	10127	40500
	5	136359	130360	75874	64974	10900	50718	18739	11697	5900	29192
	6	165955	160949	97737	84049	13688	57578	20951	12998	7100	32587
	7	94722	92242	27785	20261	7524	60399	25719	16929	7956	30733
	8	163615	159801	54937	41642	13295	99398	40125	25684	13144	54517
	9	159975	158272	61347	51881	9466	92019	37531	23304	12969	50747
	10	160974	158730	39925	32910	7015	113998	46257	26986	17650	62821
E3KO	1	147078	142719	52994	41436	11558	85463	35392	22651	11485	46965
	2	168675	165236	76033	57298	18735	84465	36572	22622	11958	45275
	3	96851	93238	40396	29906	10490	48346	22200	14098	7440	23427
	4	166000	162453	57758	41737	16021	99416	41044	27156	12412	55455
	5	159452	155279	65254	48075	17179	84873	32706	20092	11054	48965
	6	167989	165134	76752	65160	11592	84493	36226	22634	12110	45936
	7	161532	158440	52683	42106	10577	101397	45917	29712	15007	52483
	8	141779	138330	48763	36464	12299	85583	37247	22996	13163	45516
	9	160523	158138	57255	42022	15233	96448	41598	26606	13743	51228
			Percentages
	Mouse ID		CD45.2+	CD11b+ and GR-1+ or -	CD11b+ GR-1+	CD11b+ GR-1-	CD11b-	CD3+	CD4+	CD8+	CD19+
EWT	1		98.5625	32.3983	67.8343	32.1657	68.3592	28.4738	62.2899	37.7101	39.1278
	2		97.3523	37.9261	58.1294	41.8706	64.1392	22.7401	64.5138	35.4862	39.3338
	3		97.4705	45.0753	69.5156	30.4844	56.795	21.8972	62.6053	37.3947	33.0275
	4		98.372	41.1972	75.2624	24.7376	60.5093	25.9775	65.3111	34.6889	32.8253
	5		97.8931	36.9808	59.4004	40.5996	63.8592	31.1153	66.9701	33.0299	31.9039
	6		97.5032	38.0669	62.1584	37.8416	62.9994	26.1267	62.2833	37.7167	35.8064
	7		97.7402	33.5083	73.511	26.489	68.5672	27.8303	67.5254	32.4746	38.6614
	8		97.5868	36.8652	71.3199	28.6801	64.5209	26.3598	63.6963	36.3037	36.7751
ECtrl	1		98.3577	26.723	69.8129	30.1871	73.9317	29.4733	65.0642	34.9358	43.8036
	2		98.4775	49.2886	77.8478	22.1522	51.9639	19.2526	64.3137	35.6863	31.4589
	3		97.6239	49.5515	82.3341	17.6659	51.2566	18.7344	63.7889	36.2111	31.7141
	4		94.6485	27.9683	63.6347	36.3653	72.6595	24.4733	61.5825	38.4175	47.5584
	5		97.7893	35.8804	65.3821	34.6179	64.9487	25.541	64.187	35.813	38.5787
	6		97.7254	47.5314	74.1568	25.8432	53.8985	19.6767	65.5518	34.4482	32.792
	7		97.0379	34.1233	68.351	31.649	67.167	28.0222	63.7269	36.2731	37.8545
	8		96.4073	47.1236	70.7939	29.2061	54.2514	19.7002	63.7486	36.2514	33.1762
	9		98.4713	54.7919	83.7586	16.2414	46.4129	19.5518	61.8433	38.1567	25.6563
EfCtrl	1		98.6161	41.0722	82.2857	17.7143	59.5342	25.9595	63.6431	36.3569	32.9683
	2		98.1891	45.5666	73.7221	26.2779	55.7148	20.6318	64.4983	35.5017	33.8016
	3		98.4935	42.231	86.2999	13.7001	58.4564	23.5663	61.5803	38.4197	34.2027
	4		97.6208	54.6032	89.9444	10.0556	46.6535	19.0181	64.1408	35.8592	26.3787
	5		95.6006	61.2851	85.6341	14.3659	40.0641	15.1359	66.4716	33.5284	23.579
	6		96.9835	64.6088	85.9951	14.0049	37.0718	13.8496	64.6731	35.3269	21.5416
	7		97.3818	32.9843	72.9206	27.0794	68.492	30.5317	68.0289	31.9711	36.484
	8		97.6689	36.7277	75.7996	24.2004	64.4041	26.8253	66.1481	33.8519	36.447
	9		98.9355	41.0005	84.5697	15.4303	59.9996	25.0834	64.2461	35.7539	33.9161
	10		98.606	26.7948	82.4296	17.5704	74.0617	31.0443	60.4579	39.5421	42.1609
E3KO	1		97.0363	39.153	78.19	21.81	61.7253	26.1483	66.3552	33.6448	34.6987
	2		97.9612	48.1587	75.3594	24.6406	52.6268	23.1644	65.4193	34.5807	28.6768
	3		96.2695	46.9595	74.0321	25.9679	54.4793	25.8071	65.4564	34.5436	27.2334
	4		97.8633	37.4427	72.2619	27.7381	63.2522	26.6075	68.6312	31.3688	35.9497
	5		97.3829	44.4131	73.6736	26.3264	56.5341	22.2603	64.5091	35.4909	33.3265
	6		98.3005	48.2978	84.8968	15.1032	52.4004	22.796	65.1451	34.8549	28.9062
	7		98.0858	34.8702	79.9233	20.0767	65.808	30.3919	66.4416	33.5584	34.7379
	8		97.5673	37.0748	74.778	25.222	63.7034	28.3191	63.5969	36.4031	34.6061
	9		98.5142	38.1494	73.3945	26.6055	62.7496	27.717	65.9397	34.0603	34.1336
			Percentages, Averages
			CD45.2+	Myeloid Cells	T Cells	B Cells
		EWT	97.8101	37.7523	26.3151	35.9326
		ECtrl	97.3932	41.4424	22.7139	35.8436
		EfCtrl	97.8096	44.6874	23.1646	32.148
		E3KO	97.6646	41.6133	25.9124	32.4743
			SEM	SEM	SEM	SEM
		EWT	0.155984	1.42479	1.05601	1.07134
		ECtrl	0.411977	3.45124	2.38629	2.38629
		EfCtrl	0.315603	3.83638	1.87456	2.02074
		E3KO	0.231568	1.76957	1.34677	1.34677
			TTEST	TTEST	TTEST	TTEST
		ECtrl vs. E3KO	0.573858	0.965414	0.0738625	0.198124
		ECtrl vs. EfCtrl	0.428165	0.541326	0.852251	0.238262
		EfCtrl vs. E3KO	0.720817	0.492981	0.220932	0.892096
		EWT vs. E3KO	0.619206	0.115432	0.775982	0.0393051
		EWT vs. EfCtrl	0.998967	0.142603	0.191078	0.144099
		EWT vs. ECtrl	0.381563	0.360245	0.0625433	0.973248

## Sheet: Panel E
		Event Counts in Indicated Gates
	Mouse ID	FSC-A, FSC-H subset	FSC-A, <Indo-1 (Violet)-A> subset	CD45.1+	CD45.1+ CD45.2+	CD45.2+		FSC-A, FSC-H subset	FSC-A, <Indo-1 (Violet)-A> subset	CD45.1+	CD45.1+ CD45.2+	CD45.2+
ECtrl	1	161096	158248	83218	23001	51387		204617	201869	101447	8168	91323
	2	163115	159073	98882	28824	30571		205297	204446	88639	18963	95634
	3	159594	157566	89861	23444	43776		206927	206317	124047	9484	71716
	4	161853	158257	103212	23607	30792		201792	200994	53626	5163	140989
	5	138310	136054	73609	19113	38676		201142	200744	102680	8181	88946
	6	158915	155793	84054	27294	43704		203816	202729	154919	9615	37568
	7	160497	157298	101277	24584	30314		203042	202617	68226	3950	129143
EfCtrl	1	150986	148823	70335	19829	58078		204184	202788	78444	36239	87071
	2	150171	146951	79779	25407	40570		209967	207949	174050	13752	19542
	3	143912	140918	76500	14624	48935		218799	214845	129666	6761	77794
	4	158058	155600	112773	18387	23765		205278	203939	64354	10643	127744
	5	158783	155967	95506	23155	36631		200292	199213	100143	10172	87729
	6	153327	150683	78110	24529	46833		211430	209911	169723	9732	29708
	7	158844	156185	82810	19440	52841		201469	199904	130133	5952	62956
E3KO	1	164626	162365	90867	22698	47885		205505	205048	143205	7330	53602
	2	159444	156399	92587	24191	38942		198447	197534	107170	7946	81408
	3	160095	157522	83262	20618	53001		205225	204539	139700	6974	57422
	4	160161	157482	93140	23711	40043		202612	202166	159822	11572	29904
	5	152995	150188	82104	20748	43980		200241	199703	60991	9787	127937
	6	161775	159314	84547	25414	48633		202565	202032	56653	9393	134850
	7	160424	158190	96422	27815	33371		205580	204513	120447	9825	73188
	8	162947	160499	86539	25690	47611		209664	207346	95300	8107	102606
						Percentages
ECtrl	1					32.6047						45.4483
	2					19.3149						47.0556
	3					27.8684						34.9413
	4					19.5367						70.5728
	5					29.4342						44.516
	6					28.1867						18.5886
	7					19.4103						64.1484
EfCtrl	1					39.1778						43.157
	2					27.8342						9.42492
	3					34.9388						36.3148
	4					15.3397						63.0085
	5					23.5885						44.2977
	6					31.3323						14.2033
	7					34.071						31.6297
E3KO	1					29.6593						26.2579
	2					25.0077						41.4239
	3					33.7842						28.1348
	4					25.5223						14.8556
	5					29.9526						64.3822
	6					30.6651						67.1243
	7					21.1734						35.9717
	8					29.7867						49.8056
	Percentages, Averages
Weeks Post Transplant	5	20
ECtrl	25.1937	46.4673
EfCtrl	29.4689	34.5766
E3KO	28.1939	40.9945
	SEM	SEM
ECtrl	2.12148	6.56281
EfCtrl	3.03049	6.96228
E3KO	1.41239	6.5446
	Ttest	Ttest
ECtrl vs. E3KO	0.249588	0.566748
ECtrl vs. EfCtrl	0.270301	0.237685
EfCtrl vs. E3KO	0.69691	0.513707
