# Supplementary material for: Suppression of ischemia in arterial occlusive disease by JNK-promoted native collateral artery development
Source: eLife. 2016 Aug 9;5:e18414. doi: 10.7554/eLife.18414 (PMC4999312; doi:10.7554/eLife.18414)
Supplement: Figure 1—figure supplement 3—source data 1. — This file contains raw source data used to make the graphs presented in Figure 1—figure supplement 3. DOI: http://dx.doi.org/10.7554/eLife.18414.010 [file elife-18414-fig1-figsupp3-data1.xlsx]

## Sheet: Panel C
		Well	Sample Name	Target Name	Task	Reporter	Quencher	CT		ΔCт	RQ	AVE RQ	SE RQ	Normalized Ave RQ	Norm SE RQ
		193	ECtrl MLEC	18S	UNKNOWN	VIC	NFQ-MGB	9.926				1.38771e-06	8.12345e-08	1	0.0585383			21% O2	1% O2
		193	ECtrl MLEC	Vegfa	UNKNOWN	FAM	NFQ-MGB	29.239		19.313	1.53535e-06						ECtrl	1	15.8558
		217	ECtrl MLEC	18S	UNKNOWN	VIC	NFQ-MGB	10.35									EfCtrl	1.0384	19.1525
		217	ECtrl MLEC	Vegfa	UNKNOWN	FAM	NFQ-MGB	29.742		19.392	1.45354e-06						E3KO	1.16195	19.0104
		241	ECtrl MLEC	18S	UNKNOWN	VIC	NFQ-MGB	9.836
		241	ECtrl MLEC	Vegfa	UNKNOWN	FAM	NFQ-MGB	29.278		19.442	1.40403e-06							SEM	SEM
		265	ECtrl MLEC	Vegfa	UNKNOWN	FAM	NFQ-MGB	30.066									ECtrl	0.0585383	0.947126
		265	ECtrl MLEC	18S	UNKNOWN	VIC	NFQ-MGB	10.346		19.72	1.15795e-06						EfCtrl	0.0823013	1.99629
																	E3KO	0.0666191	1.43257
		195	EfCtrl MLEC	18S	UNKNOWN	VIC	NFQ-MGB	9.889				1.44101e-06	1.14211e-07	1.0384	0.0823013
		195	EfCtrl MLEC	Vegfa	UNKNOWN	FAM	NFQ-MGB	29.489		19.6	1.25838e-06							Ttest	Ttest
		219	EfCtrl MLEC	18S	UNKNOWN	VIC	NFQ-MGB	9.941									ECtrl vs. E3KO	0.117605	0.115878
		219	EfCtrl MLEC	Vegfa	UNKNOWN	FAM	NFQ-MGB	29.48		19.539	1.31273e-06						ECtrl vs. EfCtrl	0.716857	0.186299
		243	EfCtrl MLEC	18S	UNKNOWN	VIC	NFQ-MGB	10.076									EfCtrl vs. E3KO	0.287546	0.955757
		243	EfCtrl MLEC	Vegfa	UNKNOWN	FAM	NFQ-MGB	29.186		19.11	1.76733e-06
		267	EfCtrl MLEC	Vegfa	UNKNOWN	FAM	NFQ-MGB	29.856
		267	EfCtrl MLEC	18S	UNKNOWN	VIC	NFQ-MGB	10.436		19.42	1.4256e-06
		194	E3KO MLEC	Vegfa	UNKNOWN	FAM	NFQ-MGB	29.069				1.61246e-06	9.24483e-08	1.16195	0.0666191
		194	E3KO MLEC	18S	UNKNOWN	VIC	NFQ-MGB	9.938		19.131	1.74179e-06
		218	E3KO MLEC	18S	UNKNOWN	VIC	NFQ-MGB	11.116
		218	E3KO MLEC	Vegfa	UNKNOWN	FAM	NFQ-MGB	30.598		19.482	1.36563e-06
		242	E3KO MLEC	18S	UNKNOWN	VIC	NFQ-MGB	9.978
		242	E3KO MLEC	Vegfa	UNKNOWN	FAM	NFQ-MGB	29.089		19.111	1.7661e-06
		266	E3KO MLEC	Vegfa	UNKNOWN	FAM	NFQ-MGB	28.973
		266	E3KO MLEC	18S	UNKNOWN	VIC	NFQ-MGB	9.698		19.275	1.57633e-06
		292	ECtrl MLEC Hypoxia 1%O2 16hrs	18S	UNKNOWN	VIC	NFQ-MGB	10.065				2.20034e-05	1.31434e-06	15.8558	0.947126
		292	ECtrl MLEC Hypoxia 1%O2 16hrs	Vegfa	UNKNOWN	FAM	NFQ-MGB	25.503		15.438	2.25268e-05
		316	ECtrl MLEC Hypoxia 1%O2 16hrs	Vegfa	UNKNOWN	FAM	NFQ-MGB	25.45
		316	ECtrl MLEC Hypoxia 1%O2 16hrs	18S	UNKNOWN	VIC	NFQ-MGB	10.186		15.264	2.54143e-05
		340	ECtrl MLEC Hypoxia 1%O2 16hrs	Vegfa	UNKNOWN	FAM	NFQ-MGB	25.52
		340	ECtrl MLEC Hypoxia 1%O2 16hrs	18S	UNKNOWN	VIC	NFQ-MGB	9.965		15.555	2.0772e-05
		364	ECtrl MLEC Hypoxia 1%O2 16hrs	Vegfa	UNKNOWN	FAM	NFQ-MGB	25.871
		364	ECtrl MLEC Hypoxia 1%O2 16hrs	18S	UNKNOWN	VIC	NFQ-MGB	10.21		15.661	1.93005e-05
		294	EfCtrl MLEC Hypoxia 1%O2 16hrs	18S	UNKNOWN	VIC	NFQ-MGB	10.093				2.65783e-05	2.77028e-06	19.1525	1.99629
		294	EfCtrl MLEC Hypoxia 1%O2 16hrs	Vegfa	UNKNOWN	FAM	NFQ-MGB	25.678		15.585	2.03445e-05
		318	EfCtrl MLEC Hypoxia 1%O2 16hrs	Vegfa	UNKNOWN	FAM	NFQ-MGB	25.228
		318	EfCtrl MLEC Hypoxia 1%O2 16hrs	18S	UNKNOWN	VIC	NFQ-MGB	10.217		15.011	3.02858e-05
		342	EfCtrl MLEC Hypoxia 1%O2 16hrs	Vegfa	UNKNOWN	FAM	NFQ-MGB	25.464
		342	EfCtrl MLEC Hypoxia 1%O2 16hrs	18S	UNKNOWN	VIC	NFQ-MGB	10.092		15.372	2.35812e-05
		366	EfCtrl MLEC Hypoxia 1%O2 16hrs	Vegfa	UNKNOWN	FAM	NFQ-MGB	26.177
		366	EfCtrl MLEC Hypoxia 1%O2 16hrs	18S	UNKNOWN	VIC	NFQ-MGB	11.25		14.927	3.21015e-05
		293	E3KO MLEC Hypoxia 1%O2 16hrs	18S	UNKNOWN	VIC	NFQ-MGB	10.29				2.6381e-05	1.988e-06	19.0104	1.43257
		293	E3KO MLEC Hypoxia 1%O2 16hrs	Vegfa	UNKNOWN	FAM	NFQ-MGB	25.825		15.535	2.1062e-05
		317	E3KO MLEC Hypoxia 1%O2 16hrs	Vegfa	UNKNOWN	FAM	NFQ-MGB	25.472
		317	E3KO MLEC Hypoxia 1%O2 16hrs	18S	UNKNOWN	VIC	NFQ-MGB	10.22		15.252	2.56266e-05
		341	E3KO MLEC Hypoxia 1%O2 16hrs	Vegfa	UNKNOWN	FAM	NFQ-MGB	25.58
		341	E3KO MLEC Hypoxia 1%O2 16hrs	18S	UNKNOWN	VIC	NFQ-MGB	10.515		15.065	2.91731e-05
		365	E3KO MLEC Hypoxia 1%O2 16hrs	Vegfa	UNKNOWN	FAM	NFQ-MGB	25.741
		365	E3KO MLEC Hypoxia 1%O2 16hrs	18S	UNKNOWN	VIC	NFQ-MGB	10.7		15.041	2.96625e-05

## Sheet: Panel D
		Well	Sample Name	Target Name	Task	Reporter	Quencher	CT		ΔCт	RQ	AVE RQ	SE RQ	Normalized Ave RQ	Norm SE RQ
		199	ECtrl MLEC	Slc2a1 (Glut1)	UNKNOWN	FAM	NFQ-MGB	23.715				7.3563e-05	8.74221e-06	1	0.11884			21% O2	1% O2
		199	ECtrl MLEC	18S	UNKNOWN	VIC	NFQ-MGB	10.161		13.554	8.31456e-05						ECtrl	1	4.47529
		223	ECtrl MLEC	Slc2a1 (Glut1)	UNKNOWN	FAM	NFQ-MGB	24.364									EfCtrl	1.10054	5.33547
		223	ECtrl MLEC	18S	UNKNOWN	VIC	NFQ-MGB	10.254		14.11	5.65544e-05						E3KO	1.20857	5.18217
		247	ECtrl MLEC	Slc2a1 (Glut1)	UNKNOWN	FAM	NFQ-MGB	23.846
		247	ECtrl MLEC	18S	UNKNOWN	VIC	NFQ-MGB	9.853		13.993	6.1332e-05							SEM	SEM
		271	ECtrl MLEC	Slc2a1 (Glut1)	UNKNOWN	FAM	NFQ-MGB	24.19									ECtrl	0.11884	0.311971
		271	ECtrl MLEC	18S	UNKNOWN	VIC	NFQ-MGB	10.801		13.389	9.322e-05						EfCtrl	0.0565025	0.727965
																	E3KO	0.124329	0.423777
		201	EfCtrl MLEC	Slc2a1 (Glut1)	UNKNOWN	FAM	NFQ-MGB	23.841				8.09592e-05	4.1565e-06	1.10054	0.0565025
		201	EfCtrl MLEC	18S	UNKNOWN	VIC	NFQ-MGB	10.065		13.776	7.12871e-05							Ttest	Ttest
		225	EfCtrl MLEC	Slc2a1 (Glut1)	UNKNOWN	FAM	NFQ-MGB	23.809									ECtrl vs. E3KO	0.27082	0.227747
		225	EfCtrl MLEC	18S	UNKNOWN	VIC	NFQ-MGB	10.341		13.468	8.82527e-05						ECtrl vs. EfCtrl	0.473795	0.319132
		249	EfCtrl MLEC	Slc2a1 (Glut1)	UNKNOWN	FAM	NFQ-MGB	23.68									EfCtrl vs. E3KO	0.459031	0.861579
		249	EfCtrl MLEC	18S	UNKNOWN	VIC	NFQ-MGB	10.011		13.669	7.67752e-05
		273	EfCtrl MLEC	Slc2a1 (Glut1)	UNKNOWN	FAM	NFQ-MGB	23.837
		273	EfCtrl MLEC	18S	UNKNOWN	VIC	NFQ-MGB	10.357		13.48	8.75217e-05
		200	E3KO MLEC	Slc2a1 (Glut1)	UNKNOWN	FAM	NFQ-MGB	23.98				8.89062e-05	9.14598e-06	1.20857	0.124329
		200	E3KO MLEC	18S	UNKNOWN	VIC	NFQ-MGB	10.394		13.586	8.13217e-05
		224	E3KO MLEC	Slc2a1 (Glut1)	UNKNOWN	FAM	NFQ-MGB	25.392
		224	E3KO MLEC	18S	UNKNOWN	VIC	NFQ-MGB	12.273		13.119	0.000112405
		248	E3KO MLEC	Slc2a1 (Glut1)	UNKNOWN	FAM	NFQ-MGB	24.096
		248	E3KO MLEC	18S	UNKNOWN	VIC	NFQ-MGB	10.696		13.4	9.2512e-05
		272	E3KO MLEC	Slc2a1 (Glut1)	UNKNOWN	FAM	NFQ-MGB	23.898
		272	E3KO MLEC	18S	UNKNOWN	VIC	NFQ-MGB	10.083		13.815	6.93858e-05
		298	ECtrl MLEC Hypoxia 1%O2 16hrs	Slc2a1 (Glut1)	UNKNOWN	FAM	NFQ-MGB	22.055				0.000329216	2.29495e-05	4.47529	0.311971
		298	ECtrl MLEC Hypoxia 1%O2 16hrs	18S	UNKNOWN	VIC	NFQ-MGB	10.513		11.542	0.00033536
		322	ECtrl MLEC Hypoxia 1%O2 16hrs	Slc2a1 (Glut1)	UNKNOWN	FAM	NFQ-MGB	22.141
		322	ECtrl MLEC Hypoxia 1%O2 16hrs	18S	UNKNOWN	VIC	NFQ-MGB	10.273		11.868	0.000267532
		346	ECtrl MLEC Hypoxia 1%O2 16hrs	Slc2a1 (Glut1)	UNKNOWN	FAM	NFQ-MGB	21.968
		346	ECtrl MLEC Hypoxia 1%O2 16hrs	18S	UNKNOWN	VIC	NFQ-MGB	10.601		11.367	0.00037861
		370	ECtrl MLEC Hypoxia 1%O2 16hrs	Slc2a1 (Glut1)	UNKNOWN	FAM	NFQ-MGB	22.163
		370	ECtrl MLEC Hypoxia 1%O2 16hrs	18S	UNKNOWN	VIC	NFQ-MGB	10.621		11.542	0.00033536
		300	EfCtrl MLEC Hypoxia 1%O2 16hrs	Slc2a1 (Glut1)	UNKNOWN	FAM	NFQ-MGB	22.004				0.000392494	5.35513e-05	5.33547	0.727965
		300	EfCtrl MLEC Hypoxia 1%O2 16hrs	18S	UNKNOWN	VIC	NFQ-MGB	10.595		11.409	0.000367747
		324	EfCtrl MLEC Hypoxia 1%O2 16hrs	Slc2a1 (Glut1)	UNKNOWN	FAM	NFQ-MGB	21.985
		324	EfCtrl MLEC Hypoxia 1%O2 16hrs	18S	UNKNOWN	VIC	NFQ-MGB	10.687		11.298	0.000397158
		348	EfCtrl MLEC Hypoxia 1%O2 16hrs	Slc2a1 (Glut1)	UNKNOWN	FAM	NFQ-MGB	22.183
		348	EfCtrl MLEC Hypoxia 1%O2 16hrs	18S	UNKNOWN	VIC	NFQ-MGB	10.344		11.839	0.000272964
		372	EfCtrl MLEC Hypoxia 1%O2 16hrs	Slc2a1 (Glut1)	UNKNOWN	FAM	NFQ-MGB	22.242
		372	EfCtrl MLEC Hypoxia 1%O2 16hrs	18S	UNKNOWN	VIC	NFQ-MGB	11.366		10.876	0.000532105
		299	E3KO MLEC Hypoxia 1%O2 16hrs	Slc2a1 (Glut1)	UNKNOWN	FAM	NFQ-MGB	22.397				0.000381216	3.11743e-05	5.18217	0.423777
		299	E3KO MLEC Hypoxia 1%O2 16hrs	18S	UNKNOWN	VIC	NFQ-MGB	10.637		11.76	0.000288328
		323	E3KO MLEC Hypoxia 1%O2 16hrs	Slc2a1 (Glut1)	UNKNOWN	FAM	NFQ-MGB	21.983
		323	E3KO MLEC Hypoxia 1%O2 16hrs	18S	UNKNOWN	VIC	NFQ-MGB	10.704		11.279	0.000402423
		347	E3KO MLEC Hypoxia 1%O2 16hrs	Slc2a1 (Glut1)	UNKNOWN	FAM	NFQ-MGB	22.27
		347	E3KO MLEC Hypoxia 1%O2 16hrs	18S	UNKNOWN	VIC	NFQ-MGB	11.052		11.218	0.000419803
		371	E3KO MLEC Hypoxia 1%O2 16hrs	Slc2a1 (Glut1)	UNKNOWN	FAM	NFQ-MGB	22.282
		371	E3KO MLEC Hypoxia 1%O2 16hrs	18S	UNKNOWN	VIC	NFQ-MGB	11.045		11.237	0.000414311
