# Supplementary material for: Suppression of ischemia in arterial occlusive disease by JNK-promoted native collateral artery development
Source: eLife. 2016 Aug 9;5:e18414. doi: 10.7554/eLife.18414 (PMC4999312; doi:10.7554/eLife.18414)
Supplement: Figure 1—figure supplement 4—source data 1. — This file contains raw source data used to make the graphs presented in Figure 1—figure supplement 4. DOI: http://dx.doi.org/10.7554/eLife.18414.012 [file elife-18414-fig1-figsupp4-data1.xlsx]

## Sheet: Panel B
		Sprouts per Ring					Sprouts per Ring					Sprouts per Ring					Sprouts per Ring
	EWT					E2KO					ECtrl					E3KO
	Aortic Rings	Control	VEGF	Aortic Rings		Aortic Rings	Control	VEGF	Aortic Rings		Aortic Rings	Control	VEGF	Aortic Rings		Aortic Rings	Control	VEGF	Aortic Rings
	1	0	25	1		1	0	58	1		1	0	40	1		1	9	43	1
	2	0	15	2		2	4	42	2		2	4	21	2		2	16	81	2
	3	0	5	3		3	4	39	3		3	4	17	3		3	6	87	3
	4	0	45	4		4	0	46	4		4	15	55	4		4	10	35	4
	5	2	64	5		5	0	61	5		5	5	62	5		5	3	13	5
	6	0	59	6		6	0	35	6		6	4	67	6		6	0	42	6
	7	5	4	7		7	0	63	7		7	20	98	7		7	0	56	7
	8	0	82	8		8	0	47	8		8	7	91	8		8	4	68	8
	9	0	45	9							9	16	72	9		9	4	61	9
	10	0	62	10							10	15	97	10		10	5	37	10
			63	11									14	11				32	11
			38	12									40	12				27	12
			5	13									57	13				11	13
			13	14									76	14				73	14
			36	15									39	15				31	15
													46	16				67	16
													47	17				43	17
													34	18				52	18
													13	19				43	19
													56	20
													14	21
		EWT	E2KO	ECtrl	E3KO
	Control	0.7	1	9	5.7
	VEGF	37.4	48.875	50.2857	47.4737
		SEM	SEM	SEM	SEM
		0.517472	0.654654	2.1551	1.54236
		6.5493	3.72941	5.85302	4.90278
		Ttest	Ttest	Ttest	Ttest
		0.720061	0.238165	0.229022	0.717797
		EWT Ctrl. vs. E2KO Ctrl.	EWT VEGF vs. E2KO VEGF	ECtrl Ctrl. vs. E3KO Ctrl.	ECtrl VEGF vs. E3KO VEGF

## Sheet: Panel C
		Slice	Counts		Slice	Counts
			Edu+ Nuclei			Edu+ Nuclei
		ECtrl_Series003_z000_ch00.tif	48		E3KO_Series005_z000_ch00.tif	101
		ECtrl_Series006_z000_ch00.tif	73		E3KO_Series012_z000_ch00.tif	92
		ECtrl_Series009_z000_ch00.tif	75		E3KO_Series016_z000_ch00.tif	93
		ECtrl_Series012_z000_ch00.tif	74		E3KO_Series019_z000_ch00.tif	60
		ECtrl_Series015_z000_ch00.tif	63		E3KO_Series022_z000_ch00.tif	86
		ECtrl_Series018_z000_ch00.tif	84		E3KO_Series025_z000_ch00.tif	91
		ECtrl_Series021_z000_ch00.tif	102		E3KO_Series027_z000_ch00.tif	71
		ECtrl_Series024_z000_ch00.tif	55		E3KO_Series031_z000_ch00.tif	97
		ECtrl_Series027_z000_ch00.tif	79		E3KO_Series034_z000_ch00.tif	89
		ECtrl_Series030_z000_ch00.tif	45		E3KO_Series037_z000_ch00.tif	82
			Nuclei			Nuclei
		ECtrl_Series003_z000_ch03.tif	162		E3KO_Series005_z000_ch03.tif	299
		ECtrl_Series006_z000_ch03.tif	188		E3KO_Series012_z000_ch03.tif	304
		ECtrl_Series009_z000_ch03.tif	188		E3KO_Series016_z000_ch03.tif	217
		ECtrl_Series012_z000_ch03.tif	220		E3KO_Series019_z000_ch03.tif	201
		ECtrl_Series015_z000_ch03.tif	219		E3KO_Series022_z000_ch03.tif	249
		ECtrl_Series018_z000_ch03.tif	264		E3KO_Series025_z000_ch03.tif	250
		ECtrl_Series021_z000_ch03.tif	326		E3KO_Series027_z000_ch03.tif	260
		ECtrl_Series024_z000_ch03.tif	233		E3KO_Series031_z000_ch03.tif	280
		ECtrl_Series027_z000_ch03.tif	236		E3KO_Series034_z000_ch03.tif	289
		ECtrl_Series030_z000_ch03.tif	204		E3KO_Series037_z000_ch03.tif	270
			Percent Edu+ Nuclei			Percent Edu+ Nuclei			Average Percent Edu+ Nuclei
			29.6296			33.7793			ECtrl	E3KO
			38.8298			30.2632			31.3002	33.0805
			39.8936			42.8571			SEM	SEM
			33.6364			29.8507			1.80991	1.39807
			28.7671			34.5382			Ttest
			31.8182			36.4			0.446405
			31.2883			27.3077
			23.6052			34.6429
			33.4746			30.7958
			22.0588			30.3704

## Sheet: Panel D
		Slice	Counts		Slice	Counts
			Ki67+ Nuclei			Ki67+ Nuclei
		ECtrl_Series005_z000_ch01.tif	84		E3KO_Series002_z000_ch01.tif	115
		ECtrl_Series007_z000_ch01.tif	91		E3KO_Series004_z000_ch01.tif	122
		ECtrl_Series009_z000_ch01.tif	87		E3KO_Series006_z000_ch01.tif	134
		ECtrl_Series012_z000_ch01.tif	84		E3KO_Series008_z000_ch01.tif	185
		ECtrl_Series014_z000_ch01.tif	101		E3KO_Series013_z000_ch01.tif	153
		ECtrl_Series016_z000_ch01.tif	82		E3KO_Series015_z000_ch01.tif	151
		ECtrl_Series018_z000_ch01.tif	95		E3KO_Series017_z000_ch01.tif	132
		ECtrl_Series020_z000_ch01.tif	98		E3KO_Series019_z000_ch01.tif	98
		ECtrl_Series022_z000_ch01.tif	92		E3KO_Series021_z000_ch01.tif	130
		ECtrl_Series024_z000_ch01.tif	133		E3KO_Series023_z000_ch01.tif	131
			Nuclei			Nuclei
		ECtrl_Series005_z000_ch03.tif	179		E3KO_Series002_z000_ch03.tif	247
		ECtrl_Series007_z000_ch03.tif	182		E3KO_Series004_z000_ch03.tif	255
		ECtrl_Series009_z000_ch03.tif	168		E3KO_Series006_z000_ch03.tif	260
		ECtrl_Series012_z000_ch03.tif	187		E3KO_Series008_z000_ch03.tif	352
		ECtrl_Series014_z000_ch03.tif	212		E3KO_Series013_z000_ch03.tif	341
		ECtrl_Series016_z000_ch03.tif	219		E3KO_Series015_z000_ch03.tif	370
		ECtrl_Series018_z000_ch03.tif	221		E3KO_Series017_z000_ch03.tif	300
		ECtrl_Series020_z000_ch03.tif	228		E3KO_Series019_z000_ch03.tif	232
		ECtrl_Series022_z000_ch03.tif	201		E3KO_Series021_z000_ch03.tif	300
		ECtrl_Series024_z000_ch03.tif	254		E3KO_Series023_z000_ch03.tif	260
			Percent Ki67+ Nuclei			Percent Ki67+ Nuclei			Average Percent Ki67+ Nuclei
			46.9274			46.5587			ECtrl	E3KO
			50			47.8431			46.282	46.4135
			51.7857			51.5385			SEM	SEM
			44.9198			52.5568			1.43504	1.28382
			47.6415			44.868			Ttest
			37.4429			40.8108			0.946274
			42.9864			44
			42.9825			42.2414
			45.7711			43.3333
			52.3622			50.3846

## Sheet: Panel E
			Wound Area at Indicated Time Points
		Time (Hrs post wounding)	0	6	12	18	24	30	36	42	48	54	60
	ECtrl	1	575085	527115	448026	349863	188553	59565	6274	0	0	0	0
		2	600906	510321	391089	232491	65307	30144	12546	0	0	0	0
		3	668664	592563	473070	326976	177777	33588	7764	0	0	0	0
		4	517155	438699	362121	245901	109635	7260	2667	0	0	0	0
		5	604215	497826	419274	256839	104523	15318	4422	0	0	0	0
		6	676071	502686	495894	364863	254484	55221	28936	0	0	0	0
		7	502611	385134	326022	198780	39639	3250	1602	0	0	0	0
		8	587772	508044	426021	285834	164442	36465	3309	0	0	0	0
	EfCtrl	1	517338	400986	301152	148845	41019	42753	4557	0	0	0	0
		2	621585	496194	395151	288948	161535	85458	6856	0	0	0	0
		3	659343	529842	381528	246789	124101	78912	4656	0	0	0	0
		4	696906	555951	416478	291960	95667	71241	6441	0	0	0	0
		5	594084	448481	306738	139158	17304	8154	204	0	0	0	0
		6	716187	591669	446691	282954	150162	48480	4476	0	0	0	0
		7	693711	592821	503592	346635	210663	78510	31644	0	0	0	0
		8	645168	574272	513564	406226	269082	145053	47934	0	0	0	0
	E3KO	1	681975	591717	498804	388230	265068	102648	45066	0	0	0	0
		2	704010	596955	461862	314829	154827	62421	17910	0	0	0	0
		3	664131	493989	350952	200451	87117	24498	2355	0	0	0	0
		4	688797	567891	432534	287316	133062	76482	35178	0	0	0	0
		5	702282	544962	413151	294489	128205	19041	17004	0	0	0	0
		6	720882	598542	511786	381090	253560	58821	6168	0	0	0	0
		7	638346	553941	450696	285666	123330	13338	5193	0	0	0	0
		8	645291	524313	465783	305019	152469	43125	21558	0	0	0	0
			Percent Initial Wound Area
		Time (Hrs post wounding)	0	6	12	18	24	30	36	42	48	54	60
	ECtrl	1	100	91.6586	77.906	60.8367	32.787	10.3576	1.09097	0	0	0	0
		2	100	84.9253	65.0832	38.6901	10.8681	5.01643	2.08785	0	0	0	0
		3	100	88.6189	70.7485	48.8999	26.5869	5.02315	1.16112	0	0	0	0
		4	100	84.8293	70.0218	47.5488	21.1996	1.40383	0.515706	0	0	0	0
		5	100	82.3922	69.3915	42.5079	17.299	2.53519	0.731859	0	0	0	0
		6	100	74.354	73.3494	53.9681	37.6416	8.16793	4.28002	0	0	0	0
		7	100	76.6267	64.8657	39.5495	7.88662	0.646623	0.318736	0	0	0	0
		8	100	86.4356	72.4807	48.6301	27.9772	6.20394	0.562973	0	0	0	0
	EfCtrl	1	100	77.5095	58.2118	28.7713	7.92886	8.26404	0.880855	0	0	0	0
		2	100	79.8272	63.5715	46.4857	25.9876	13.7484	1.10299	0	0	0	0
		3	100	80.3591	57.8649	37.4295	18.8219	11.9683	0.706157	0	0	0	0
		4	100	79.7742	59.761	41.8937	13.7274	10.2225	0.924228	0	0	0	0
		5	100	75.4912	51.6321	23.424	2.91272	1.37253	0.0343386	0	0	0	0
		6	100	82.6138	62.3707	39.5084	20.9669	6.76918	0.624976	0	0	0	0
		7	100	85.4565	72.5939	49.9682	30.3675	11.3174	4.56155	0	0	0	0
		8	100	89.0112	79.6016	62.9644	41.7073	22.483	7.42969	0	0	0	0
	E3KO	1	100	86.7652	73.1411	56.9273	38.8677	15.0516	6.60816	0	0	0	0
		2	100	84.7935	65.6045	44.7194	21.9922	8.86649	2.544	0	0	0	0
		3	100	74.3813	52.8438	30.1824	13.1174	3.68873	0.354599	0	0	0	0
		4	100	82.4468	62.7956	41.7127	19.318	11.1037	5.10717	0	0	0	0
		5	100	77.5987	58.8298	41.9332	18.2555	2.7113	2.42125	0	0	0	0
		6	100	83.0291	70.9944	52.8644	35.1736	8.15959	0.855619	0	0	0	0
		7	100	86.7775	70.6037	44.751	19.3202	2.08946	0.813509	0	0	0	0
		8	100	81.2522	72.1819	47.2684	23.6279	6.68303	3.34082	0	0	0	0
			Percent Initial Wound Area Averages
		Time (Hrs post wounding)	0	6	12	18	24	30	36	42	48	54	60
		ECtrl	100	83.7301	70.4809	47.5789	22.7807	4.91934	1.34365	0	0	0	0
		EfCtrl	100	81.2553	63.2009	41.3057	20.3025	10.7682	2.0331	0	0	0	0
		E3KO	100	82.1305	65.8743	45.0449	23.7091	7.29424	2.75564	0	0	0	0
			SEM	SEM	SEM	SEM	SEM	SEM	SEM	SEM	SEM	SEM	SEM
		ECtrl	0	2.05669	1.52066	2.63439	3.68093	1.18093	0.462774	0	0	0	0
		EfCtrl	0	1.53496	3.154	4.36389	4.41824	2.14933	0.912975	0	0	0	0
		E3KO	0	1.53782	2.57094	2.83206	3.11861	1.57761	0.779395	0	0	0	0
			Ttest	Ttest	Ttest	Ttest	Ttest	Ttest	Ttest	Ttest	Ttest	Ttest	Ttest
		ECtrl vs. E3KO	#DIV/0!	0.543392	0.145324	0.522994	0.850174	0.248126	0.141607	#DIV/0!	#DIV/0!	#DIV/0!	#DIV/0!
		ECtrl vs. EfCtrl	#DIV/0!	0.351252	0.0564705	0.238722	0.673068	0.0317712	0.511551	#DIV/0!	#DIV/0!	#DIV/0!	#DIV/0!
		EfCtrl vs. E3KO	#DIV/0!	0.693171	0.521835	0.484115	0.5389	0.213612	0.556855	#DIV/0!	#DIV/0!	#DIV/0!	#DIV/0!
