# Supplementary material for: Suppression of ischemia in arterial occlusive disease by JNK-promoted native collateral artery development
Source: eLife. 2016 Aug 9;5:e18414. doi: 10.7554/eLife.18414 (PMC4999312; doi:10.7554/eLife.18414)
Supplement: Figure 1—figure supplement 5—source data 1. — This file contains raw source data used to make the graphs presented in Figure 1—figure supplement 5. DOI: http://dx.doi.org/10.7554/eLife.18414.014 [file elife-18414-fig1-figsupp5-data1.xlsx]

## Sheet: Panel B
	ECtrl Eyes	CNV Size
	1 L	37709	12467	17912	12486
	1R	26968	37242	26582	7854
	2L	324328	13166	22900	35173
	3L	19999	23243	22805	25715
	3R	29071	153448	40263	29818
	4L	24874	13003	22161	16797
	5L	42589	49095	8832	14471
	5R	16325	6231	11072	29088
	E3KO Eyes	CNV Size
	1R	29011	18497	18325	19578
	1L	25964	11046	23612	17741
	2R	151122	8660	45310	4824
	2L	26590	12523	14840	6549
	3R	7862	13235	19827	13759
	3L	27457	174425	43902	51104
	4R	19320	11973	81059	172271
	4L	106327	17372	12257	8780
	5R	11055	29526	14128	106739
	ECtrl	E3KO
	36677.7	38238.1
	SEM	SEM
	10306.9	7703.44
	Ttest
	0.90254

## Sheet: Panel D
		Tumor ID	Genotype	Tumor Weight (g)		ECtrl	EfCtrl	E3KO
		1 L	ECtrl	0.574		0.4575	0.4606	0.3517
		1 R	ECtrl	0.609		SEM	SEM	SEM
		2 L	ECtrl	0.293		0.099194	0.126116	0.0763166
		2 R	ECtrl	1.184		Ttest	Ttest	Ttest
		3 L	ECtrl	0.378		0.40901	0.984798	0.469577
		3 R	ECtrl	0.607		ECtrl vs. E3KO	ECtrl vs. EfCtlr.	EfCtrl vs. E3KO
		4 L	ECtrl	0.412
		4 R	ECtrl	0.285
		5 L	ECtrl	0.093
		5 R	ECtrl	0.14
		1 L	EfCtrl	0.192
		1 R	EfCtrl	1.493
		2 L	EfCtrl	0.382
		2 R	EfCtrl	0.546
		3 L	EfCtrl	0.4
		3 R	EfCtrl	0.134
		4 L	EfCtrl	0.627
		4 R	EfCtrl	0.314
		5 L	EfCtrl	0.119
		5 R	EfCtrl	0.399
		1 L	E3KO	0.432
		1 R	E3KO	0.57
		2 L	E3KO	0.179
		2 R	E3KO	0.278
		3 L	E3KO	0.215
		3 R	E3KO	0.373
		4 L	E3KO	0.056
		4 R	E3KO	0.896
		5 L	E3KO	0.173
		5 R	E3KO	0.345

## Sheet: Panel F
				Vessel Number/ Tumor
Tumor	Slice	Count		Tumor	EfCtrl	E3KO
1	EfCtrl-1_1 20x s_z000_ch00.tif	48		1	62.2	27.6
	EfCtrl-1_2 20x s_z000_ch00.tif	43		2	46.8	34.1667
	EfCtrl-1_3 20x s_z000_ch00.tif	35		3	30.6667	33.2
	EfCtrl-1_4 20x s_z000_ch00.tif	108		4	61.4	36.4
	EfCtrl-1_5 20x s_z000_ch00.tif	77		5	52.4	68.8
2	EfCtrl-2_1 20x s_z000_ch00.tif	75		6	76.6	57.2
	EfCtrl-2_2 20x s_z000_ch00.tif	52		7	43.4	26
	EfCtrl-2_3 20x s_z000_ch00.tif	21		8	73.8	41.2
	EfCtrl-2_4 20x s_z000_ch00.tif	13		9	27.8	70.8
	EfCtrl-2_5 20x s_z000_ch00.tif	73		10	40	20.2
3	EfCtrl-3_1 20x s_z000_ch00.tif	23
	EfCtrl-3_2 20x s_z000_ch00.tif	15
	EfCtrl-3_3 20x s_z000_ch00.tif	25			EfCtrl	E3KO
	EfCtrl-3_4 20x s_z000_ch00.tif	32			51.5067	41.5567
	EfCtrl-3_5 20x s_z000_ch00.tif	63			SEM	SEM
	EfCtrl-3_6 20x s_z000_ch00.tif	26			5.32945	5.6629
4	EfCtrl-4_1 20x s_z000_ch00.tif	59			Ttest
	EfCtrl-4_2 20x s_z000_ch00.tif	81			0.216961
	EfCtrl-4_3 20x s_z000_ch00.tif	49
	EfCtrl-4_4 20x s_z000_ch00.tif	43
	EfCtrl-4_5 20x s_z000_ch00.tif	75
5	EfCtrl-5_1 20x s_z000_ch00.tif	34
	EfCtrl-5_2 20x s_z000_ch00.tif	70
	EfCtrl-5_3 20x s_z000_ch00.tif	54
	EfCtrl-5_4 20x s_z000_ch00.tif	34
	EfCtrl-5_5 20x s_z000_ch00.tif	70
6	EfCtrl-6_1 20x s_z000_ch00.tif	54
	EfCtrl-6_2 20x s_z000_ch00.tif	112
	EfCtrl-6_3 20x s_z000_ch00.tif	35
	EfCtrl-6_4 20x s_z000_ch00.tif	95
	EfCtrl-6_5 20x s_z000_ch00.tif	87
7	EfCtrl-7_1 20x s_z000_ch00.tif	26
	EfCtrl-7_2 20x s_z000_ch00.tif	49
	EfCtrl-7_3 20x s_z000_ch00.tif	102
	EfCtrl-7_4 20x s_z000_ch00.tif	21
	EfCtrl-7_5 20x s_z000_ch00.tif	19
8	EfCtrl-8_1 20x s_z000_ch00.tif	120
	EfCtrl-8_2 20x s_z000_ch00.tif	45
	EfCtrl-8_3 20x s_z000_ch00.tif	39
	EfCtrl-8_4 20x s_z000_ch00.tif	42
	EfCtrl-8_5 20x s_z000_ch00.tif	123
9	EfCtrl-9_1 20x s_z000_ch00.tif	17
	EfCtrl-9_2 20x s_z000_ch00.tif	39
	EfCtrl-9_3 20x s_z000_ch00.tif	25
	EfCtrl-9_4 20x s_z000_ch00.tif	23
	EfCtrl-9_5 20x s_z000_ch00.tif	35
10	EfCtrl-10_1 20x s_z000_ch00.tif	78
	EfCtrl-10_2 20x s_z000_ch00.tif	19
	EfCtrl-10_3 20x s_z000_ch00.tif	45
	EfCtrl-10_4 20x s_z000_ch00.tif	41
	EfCtrl-10_5 20x s_z000_ch00.tif	37
	EfCtrl-10_6 20x s_z000_ch00.tif	20
1	E3KO-1_1 20x s_z000_ch00.tif	31
	E3KO-1_2 20x s_z000_ch00.tif	44
	E3KO-1_3 20x s_z000_ch00.tif	25
	E3KO-1_4 20x s_z000_ch00.tif	24
	E3KO-1_5 20x s_z000_ch00.tif	14
2	E3KO-2_1 20x s_z000_ch00.tif	29
	E3KO-2_2 20x s_z000_ch00.tif	32
	E3KO-2_3 20x s_z000_ch00.tif	15
	E3KO-2_4 20x s_z000_ch00.tif	36
	E3KO-2_5 20x s_z000_ch00.tif	23
	E3KO-2_6 20x s_z000_ch00.tif	70
3	E3KO-3_1 20x s_z000_ch00.tif	25
	E3KO-3_2 20x s_z000_ch00.tif	44
	E3KO-3_3 20x s_z000_ch00.tif	21
	E3KO-3_4 20x s_z000_ch00.tif	29
	E3KO-3_5 20x s_z000_ch00.tif	47
4	E3KO-4_1 20x s_z000_ch00.tif	41
	E3KO-4_2 20x s_z000_ch00.tif	43
	E3KO-4_3 20x s_z000_ch00.tif	33
	E3KO-4_4 20x s_z000_ch00.tif	40
	E3KO-4_5 20x s_z000_ch00.tif	25
5	E3KO-5_1 20x s_z000_ch00.tif	52
	E3KO-5_2 20x s_z000_ch00.tif	69
	E3KO-5_3 20x s_z000_ch00.tif	56
	E3KO-5_4 20x s_z000_ch00.tif	111
	E3KO-5_5 20x s_z000_ch00.tif	56
6	E3KO-6_1 20x s_z000_ch00.tif	55
	E3KO-6_2 20x s_z000_ch00.tif	56
	E3KO-6_3 20x s_z000_ch00.tif	73
	E3KO-6_4 20x s_z000_ch00.tif	57
	E3KO-6_5 20x s_z000_ch00.tif	45
7	E3KO-7_1 20x s_z000_ch00.tif	22
	E3KO-7_2 20x s_z000_ch00.tif	39
	E3KO-7_3 20x s_z000_ch00.tif	31
	E3KO-7_4 20x s_z000_ch00.tif	17
	E3KO-7_5 20x s_z000_ch00.tif	21
8	E3KO-8_1 20x s_z000_ch00.tif	71
	E3KO-8_2 20x s_z000_ch00.tif	28
	E3KO-8_3 20x s_z000_ch00.tif	34
	E3KO-8_4 20x s_z000_ch00.tif	56
	E3KO-8_5 20x s_z000_ch00.tif	17
9	E3KO-9_1 20x s_z000_ch00.tif	51
	E3KO-9_2 20x s_z000_ch00.tif	76
	E3KO-9_3 20x s_z000_ch00.tif	89
	E3KO-9_4 20x s_z000_ch00.tif	111
	E3KO-9_5 20x s_z000_ch00.tif	27
10	E3KO-10_1 20x s_z000_ch00.tif	19
	E3KO-10_2 20x s_z000_ch00.tif	17
	E3KO-10_3 20x s_z000_ch00.tif	29
	E3KO-10_4 20x s_z000_ch00.tif	22
	E3KO-10_5 20x s_z000_ch00.tif	14
