# Supplementary material for: Suppression of ischemia in arterial occlusive disease by JNK-promoted native collateral artery development
Source: eLife. 2016 Aug 9;5:e18414. doi: 10.7554/eLife.18414 (PMC4999312; doi:10.7554/eLife.18414)
Supplement: Figure 1—figure supplement 6—source data 1. — This file contains raw source data used to make the graphs presented in Figure 1—figure supplement 6. DOI: http://dx.doi.org/10.7554/eLife.18414.016 [file elife-18414-fig1-figsupp6-data1.xlsx]

## Sheet: Panel B
	ECtrl					E3KO
	Mouse ID	Pre FAL	Day 1	Day 3		Mouse ID	Pre FAL	Day 1	Day 3
	1	94	17	57		1	95	3	1
	2	95	26	69		2	93	1	1
	3	91	27	57		3	100	1	3
	4	97	18	32		4	90	3	2
	5	101	36	68		5	96	5	3
	6	92	19	60		6	93	3	3
	7	99	19	62		7	95	3	3
						8	96	6	14
						9	93	3	4
						10	98	1	1
						11	105	3	2
						12	96	2	2
						13	98	14	7
						14	101	4	3
		Averages
		Pre FAL	Day 1	Day 3
	ECtrl	95.5714	23.1429	57.8571
	E3KO	96.3571	3.71429	3.5
		SEM	SEM	SEM
	ECtrl	1.37766	2.61341	4.67734
	E3KO	1.03035	0.879739	0.906327
		Ttest	Ttest	Ttest
	ECtrl vs. E3KO	0.659335	3.65034e-08	2.57597e-12

## Sheet: Pannel C
	EWT					EfCtrl					E2KO
	Mouse ID	Pre FAL	Day 1	Day 3		Mouse ID	Pre FAL	Day 1	Day 3		Mouse ID	Pre FAL	Day 1	Day 3
	1	96	10	28		1	100	13	28		1	96	3	7
	2	98	18	43		2	90	15	49		2	94	3	8
	3	93	29	56		3	90	14	51		3	95	1	1
	4	91	26	46		4	96	9	33		4	99	1	1
		Averages
		Pre FAL	Day 1	Day 3
	EWT	94.5	20.75	43.25
	EfCtrl	94	12.75	40.25
	E2KO	96	2	4.25
		SEM	SEM	SEM
	EWT	1.55456	4.26956	5.79332
	EfCtrl	2.44949	1.31498	5.73549
	E2KO	1.08012	0.57735	1.88746
		Ttest	Ttest	Ttest
	EWT vs. E2KO	0.4583	0.00481241	0.000685235
	EfCtrl vs. E2KO	0.483249	0.000293705	0.00099706
	EWT vs. EfCtrl	0.868832	0.12353	0.725508

## Sheet: Panel D
			Days Post FAL
		WT	pre day	day 1	day 3	day 7	day 14	day 21	day 28
		1	105	7	16	21	55	64	73
		2	104	24	68	81	83	86	88
		3	94	17	35	47	71	80	82
		4	102	17	24	44	67	68	80
		5	93	16	38	60	82	83	82
		Mapk8-/-	pre day	day 1	day 3	day 7	day14	day 21	day 28
		1	95	12	24	45	50	66	68
		2	91	13	23	42	56	69	71
		3	99	21	40	54	68	72	73
		4	94	19	40	60	68	75	75
		5	92	17	26	47	64	67	73
		Mapk9-/-	pre day	day 1	day 3	day 7	day 14	day 21	day 28
		1	93	14	30	58	69	78	89
		2	93	9	37	37	54	70	79
		3	93	10	20	52	63	73	75
		4	98	12	25	46	67	71	80
		5	100	18	39	85	87	90	91
			Averages
		Days Post-FAL	Pre FAL	1	3	7	14	21	28
		WT	99.6	16.2	36.2	50.6	71.6	76.2	81
		Mapk8-/-	94.2	16.4	30.6	49.6	61.2	69.8	72
		Mapk9-/-	95.4	12.6	30.2	55.6	68	76.4	82.8
			SEM	SEM	SEM	SEM	SEM	SEM	SEM
		WT	2.54165	2.70924	8.86792	9.86205	5.17301	4.31741	2.40832
		Mapk8-/-	1.39284	1.72047	3.86782	3.26497	3.55528	1.65529	1.18322
		Mapk9-/-	1.50333	1.6	3.56931	8.12773	5.4037	3.66879	3.07246
			Ttest	Ttest	Ttest	Ttest	Ttest	Ttest	Ttest
		WT vs. Mapk8-/-	0.0994441	0.951839	0.578633	0.925681	0.136138	0.203705	0.0100191
		WT vs. Mapk9-/-	0.192736	0.285637	0.547719	0.705829	0.643231	0.972705	0.657015
		Mapk8-/- vs. Mapk9-/-	0.574326	0.144456	0.941284	0.512692	0.323852	0.139681	0.0111834

## Sheet: Panel F
		Days Post Coronary Artery Ligation
		0	0.5	1	2	3	4	5	6	7
	Mouse ID
ECtrl	1	Alive	Alive	Alive	Alive	Alive	Alive	Alive	Alive	Alive
ECtrl	2	Alive	Alive	Alive	Alive	Alive	Alive	Alive	Alive	Alive
ECtrl	3	Alive	Alive	Alive	Alive	Alive	Alive	Alive	Alive	Alive
ECtrl	4	Alive	Alive	Alive	Alive	Alive	Alive	Alive	Alive	Alive
ECtrl	5	Alive	Alive	Alive	Alive	Alive	Alive	Alive	Alive	Alive
ECtrl	6	Alive	Alive	Alive	Alive	Alive	Alive	Alive	Alive	Alive
ECtrl	7	Alive	Alive	Alive	Alive	Alive	Alive	Alive	Alive	Alive
ECtrl	8	Alive	Alive	Alive	Alive	Alive	Alive	Dead
ECtrl	9	Alive	Alive	Alive	Alive	Alive	Alive	Alive	Alive	Alive
ECtrl	10	Alive	Alive	Alive	Alive	Alive	Alive	Alive	Alive	Alive
E3KO	1	Alive	Alive	Alive	Alive	Alive	Alive	Alive	Alive	Alive
E3KO	2	Alive	Dead
E3KO	3	Alive	Alive	Alive	Alive	Alive	Alive	Alive	Dead
E3KO	4	Alive	Alive	Alive	Alive	Alive	Alive	Alive	Dead
E3KO	5	Alive	Dead
E3KO	6	Alive	Alive	Alive	Alive	Alive	Alive	Dead
E3KO	7	Alive	Alive	Alive	Alive	Alive	Alive	Alive	Alive	Dead

## Sheet: Panel G
		Days Post FAL
	HfCtrl	pre day	day 1	day 3	day 7	day 14	day 21	day 28
	1	95	20	43	59	95	102	102
	2	99	16	33	65	90	90	102
	3	99	26	52	67	91	99	100
	4	96	23	51	76	95	96	106
	5	91	25	49	82	96	96	97
	H2KO	pre day	day 1	day 3	day 7	day 14	day 21	day 28
	1	95	26	62	65	93	99	101
	2	96	14	45	68	86	96	102
	3	90	17	38	66	79	84	85
	4	101	19	35	79	92	102	100
	5	98	18	49	86	92	97	103
	6	100	18	46	95	95	95	103
	7	98	20	51	82	88	88	92
	8	92	19	53	92	92	94	99
		Averages
	Days Post-FAL	Pre FAL	1	3	7	14	21	28
	HfCtrl	96	22	45.6	69.8	93.4	96.6	101.4
	H2KO	96.25	18.875	47.375	79.125	89.625	94.375	98.125
		SEM	SEM	SEM	SEM	SEM	SEM	SEM
	HfCtrl	1.48324	1.81659	3.51568	4.09145	1.2083	1.98997	1.46969
	H2KO	1.34629	1.20175	3.01743	4.15949	1.82187	2.06101	2.25545
		Ttest	Ttest	Ttest	Ttest	Ttest	Ttest	Ttest
	HfCtrl vs. H2KO	0.906201	0.161723	0.71457	0.161117	0.162389	0.482442	0.3154

## Sheet: Panel H
		Days Post FAL
	ϕCtrl	pre day	day 1	day 3	day 7	day 14	day 21	day 28
	1	97	23	47	86	86	92	94
	2	105	25	25	80	81	83	86
	3	101	26	30	77	82	82	88
	4	100	15	41	67	78	84	87
	5	95	12	33	37	57	72	74
	ϕ2KO	pre day	day 1	day 3	day 7	day 14	day 21	day 28
	1	100	11	40	58	72	79	78
	2	95	27	51	81	83	88	90
	3	99	26	74	92	98	97	97
	4	98	13	33	76	87	89	98
	5	95	26	60	87	87	87	91
		Averages
	Days Post-FAL	Pre FAL	1	3	7	14	21	28
	ϕCtrl	99.6	20.2	35.2	69.4	76.8	82.6	85.8
	ϕ2KO	97.4	20.6	51.6	78.8	85.4	88	90.8
		SEM	SEM	SEM	SEM	SEM	SEM	SEM
	ϕCtrl	1.72047	2.8178	3.92938	8.66372	5.11273	3.18748	3.2619
	ϕ2KO	1.02956	3.52987	7.25672	5.86003	4.17852	2.86356	3.56931
		Ttest	Ttest	Ttest	Ttest	Ttest	Ttest	Ttest
	ϕCtrl vs. ϕ2KO	0.304454	0.931607	0.0821116	0.395051	0.229011	0.243095	0.33135

## Sheet: Panel I
		Days Post FAL
	MCtrl	pre day	day 1	day 3	day 7	day 14	day 21	day 28
	1	101	28	85	91	91	91	95
	2	92	14	25	59	81	81	86
	3	99	37	51	78	80	86	97
	4	100	17	32	59	61	63	64
	5	92	12	24	51	59	76	76
	M2KO	pre day	day 1	day 3	day 7	day 14	day 21	day 28
	1	93	18	32	56	56	63	64
	2	94	30	45	80	85	87	88
	3	101	26	35	74	85	86	87
	4	99	45	76	92	93	91	91
	5	94	30	43	75	85	90	93
		Averages
	Days Post-FAL	Pre FAL	1	3	7	14	21	28
	MCtrl	96.8	21.6	43.4	67.6	74.4	79.4	83.6
	M2KO	96.2	29.8	46.2	75.4	80.8	83.4	84.6
		SEM	SEM	SEM	SEM	SEM	SEM	SEM
	MCtrl	1.98494	4.7392	11.4743	7.34575	6.19355	4.80208	6.15305
	M2KO	1.59374	4.38634	7.83199	5.81034	6.39062	5.18266	5.25928
		Ttest	Ttest	Ttest	Ttest	Ttest	Ttest	Ttest
	MCtrl vs. M2KO	0.819586	0.239834	0.8453	0.429112	0.49252	0.586825	0.904726
