# Supplementary material for: Suppression of ischemia in arterial occlusive disease by JNK-promoted native collateral artery development
Source: eLife. 2016 Aug 9;5:e18414. doi: 10.7554/eLife.18414 (PMC4999312; doi:10.7554/eLife.18414)
Supplement: Figure 1—figure supplement 7—source data 1. — This file contains raw source data used to make the graphs presented in Figure 1—figure supplement 7. DOI: http://dx.doi.org/10.7554/eLife.18414.018 [file elife-18414-fig1-figsupp7-data1.xlsx]

## Sheet: Panel A
	Mean Blood Pressure (mmHg)					Systolic Blood Pressure (mmHg)					Diastolic Blood Pressure (mmHg)					Heart Rate (Beats/Min)
	Mouse ID	WT	Mapk8-/-	Mapk9-/-		Mouse ID	WT	Mapk8-/-	Mapk9-/-		Mouse ID	WT	Mapk8-/-	Mapk9-/-		Mouse ID	WT	Mapk8-/-	Mapk9-/-
	1	76.5468	71.7816	75.3831		1	123.697	105.385	122.59		1	52.9717	54.9798	51.7798		1	675.936	593.763	483.835
	2	66.7776	71.093	73.1027		2	104.403	109.535	119.005		2	47.965	51.8722	50.1514		2	685.745	655.569	646.683
	3	79.0537	79.8943	77.4317		3	122.189	117.107	120.183		3	57.4858	61.2879	56.056		3	606.357	694.778	521.924
	4	73.6638	71.673	78.6113		4	107.986	112.439	117.959		4	56.5025	51.2901	58.9375		4	636.062	660.499	590.767
	5	74.3585	68.4185	71.7823		5	124.881	102.793	120.311		5	49.0972	51.231	47.5181		5	574.553	627.852	537.233
	6	86.7667	73.2597	74.9402		6	140.7	111.686	121.127		6	59.8	54.0467	51.8467		6	573.5	530.661	511.156
	7	66.2667	74.0934	70.6944		7	109	118.731	114.333		7	44.9	51.7745	48.875		7	466.4	652.694	525.103
	8	76.5667	71.1933	73.0243		8	125.1	110.901	111.852		8	52.3	51.3393	53.6104		8	512.1	635.395	586.166
	9	70.4	72.3708	73.5763		9	106.6	109.648	117.844		9	52.3	53.7321	51.4422		9	500.8	542.039	479.851
	10	83.7333				10	131.8				10	59.7				10	597.6
	11	69.4714				11	107.177				11	50.6185				11	614.623
	12	74.1856				12	114.139				12	54.2091				12	636.328
	13	73.3874				13	112.619				13	53.7715				13	511.132
	14	74.3236				14	120.436				14	51.2674				14	571.814
	15	91.6079				15	142.714				15	66.0551				15	612.821
		WT	Mapk8-/-	Mapk9-/-			WT	Mapk8-/-	Mapk9-/-			WT	Mapk8-/-	Mapk9-/-			WT	Mapk8-/-	Mapk9-/-
		75.8073	72.642	74.2829			119.563	110.914	118.356			53.9296	53.506	52.2463			585.051	621.472	542.524
		SEM	SEM	SEM			SEM	SEM	SEM			SEM	SEM	SEM			SEM	SEM	SEM
		1.8304	1.04862	0.857151			3.15524	1.67662	1.13093			1.37823	1.07704	1.18016			16.6575	18.4815	18.3308
			Ttest	Ttest				Ttest	Ttest				Ttest	Ttest				Ttest	Ttest
			0.22137	0.543852				0.0569413	0.776549				0.832091	0.410993				0.173252	0.113677
			WT vs. Mapk8-/-	WT vs. Mapk9-/-				WT vs. Mapk8-/-	WT vs. Mapk9-/-				WT vs. Mapk8-/-	WT vs. Mapk9-/-				WT vs. Mapk8-/-	WT vs. Mapk9-/-

## Sheet: Panel B
	Mean Blood Pressure (mmHg)					Systolic Blood Pressure (mmHg)					Diastolic Blood Pressure (mmHg)					Heart Rate (Beats/Min)
	Mouse ID	ECtrl	EfCtrl	E3KO		Mouse ID	ECtrl	EfCtrl	E3KO		Mouse ID	ECtrl	EfCtrl	E3KO		Mouse ID	ECtrl	EfCtrl	E3KO
	1	64.8333	74.7	76.6		1	99.9	110.1	116.8		1	47.3	57	56.5		1	584.2	673.7	587.7
	2	69.6333	85.1333	72.8667		2	112.3	125	113.4		2	48.3	65.2	52.6		2	625.7	611.8	657.221
	3	70.1	82.9333	63.5667		3	110.3	129.4	90.1		3	50	59.7	50.3		3	654.2	565.7	667.2
	4	76.2333	80.4333	82		4	115.9	120.9	119.4		4	56.4	60.2	63.3		4	627.8	534.4	603.6
	5	66.1667	69.5903	69.9333		5	100.9	101.299	105		5	48.8	53.7361	52.4		5	611.7	502.277	503
	6	73.4667	77.5644	71.8667		6	115.4	120.617	109		6	52.5	56.038	53.3		6	637	607.709	573.4
	7	69.6667	68.8301	66.9667		7	105.2	100.869	109.5		7	51.9	52.8105	45.7		7	532.7	601.309	525.5
	8	62.6394	66.2417	70.0333		8	89.5392	100.755	108.5		8	49.1895	48.9851	50.8		8	564.505	575.877	562.5
	9	64.401	63.2111	70.0445		9	99.7445	94.7205	103.316		9	46.7293	47.4564	53.4088		9	600.112	534.529	553.7
	10	70.0843		72.7085		10	97.2893		110.97		10	56.4818		53.5778		10	571.228		610.4
	11			71.5602		11			104.781		11			54.9498		11			633.632
		ECtrl	EfCtrl	E3KO			ECtrl	EfCtrl	E3KO			ECtrl	EfCtrl	E3KO			ECtrl	EfCtrl	E3KO
		68.7225	74.2931	71.6497			104.647	111.518	108.252			50.7601	55.6807	53.3488			600.914	578.589	588.896
		SEM	SEM	SEM			SEM	SEM	SEM			SEM	SEM	SEM			SEM	SEM	SEM
		1.34052	2.58288	1.44503			2.7408	4.23312	2.35469			1.1057	1.87659	1.30501			11.8955	17.2418	15.6826
			Ttest	Ttest				Ttest	Ttest				Ttest	Ttest				Ttest	Ttest
			0.156318	0.361461				0.32862	0.48843				0.150662	0.308373				0.554885	0.663792
			ECtrl vs. E3KO	EfCtrl vs. E3KO				ECtrl vs. E3KO	EfCtrl vs. E3KO				ECtrl vs. E3KO	EfCtrl vs. E3KO				ECtrl vs. E3KO	EfCtrl vs. E3KO

## Sheet: Panel C
	ECtrl					EfCtrl					E3KO
	Mouse	EF	FS	FAC		Mouse	EF	FS	FAC		Mouse	EF	FS	FAC
	1	62.0565	32.8358	56.482		1	61.9042	32.2917	76.1414		1	63.7585	33.3333	62.4433
	2	53.7207	27.7108	56.0912		2	73.995	41.5459	65.463		2	63.2852	33.5234	48.0077
	3	59.4108	30.9091	61.8863		3	61.9143	32.3864	66.5507		3	58.0931	30.3571	49.0955
	4	66.0575	35.8852	55.6331		4	79.0916	47.0297	68.4576		4	62.1524	32.5843	55.4069
	5	65.8147	35.7143	67.4888		5	67.0347	36.0825	69.3494		5	64.6999	34.5745	61.6171
	6	62.8369	33.6364	49.0418		6	51.8448	26.3158	33.3256		6	61.7251	33.0544	54.8115
	7	58.2045	30.102	53.8179		7	74.7344	42.9952	31.3966		7	52.9549	26.6667	46.6021
	8	53.557	27.3542	46.7601		8	78.3256	46.1929	58.9482		8	51.2886	25.6858	45.2364
	9	52.3693	26.4423	47.8606		9	50.8683	25.7511	46.529		9	59.1877	30.5555	34.821
	10	49.3105	24.6575	58.5234		10	66.8624	36	58.1761		10	68.965	37.3418	45.7476
	11	66.8829	36.3636	49.305		11	56.5462	28.481	64.5126		11	49.9173	25	44.464
	12	59.6781	31.2195	41.6903		12	47.3142	22.9885	42.7881		12	47.3972	23.5555	37.201
	13	60.1094	31.6038	36.4353		13	64.7723	34.4633	47.2234
	14	41.2454	20.0837	38.6713		14	55.4586	27.8788	32.3607
	15	41.553	20.1754	43.9546
		EF	FS	FAC
	ECtrl	56.8538	29.6463	50.9094
	EfCtrl	63.6191	34.3145	54.373
	E3KO	58.6187	30.5194	48.7878
		SEM	SEM	SEM
	ECtrl	2.10535	1.34583	2.25433
	EfCtrl	2.77343	2.07716	4.06562
	E3KO	1.95092	1.25473	2.47184
		Ttest	Ttest	Ttest
	ECtrl vs. E3KO	0.552689	0.64612	0.532642
	ECtrl vs. EfCtrl	0.0604631	0.066555	0.454649
	EfCtrl vs. E3KO	0.166271	0.146729	0.271262

## Sheet: Panel D
		Aorta 1	Aorta 2	Aorta 3		Aorta 1	Aorta 2	Aorta 3
		EfCtrl	EfCtrl	EfCtrl		E3KO	E3KO	E3KO
		Mean	Mean	Mean		Mean	Mean	Mean
		mN	mN	mN		mN	mN	mN
	WASH	7.5017	7.6376	7.5209		7.5729	7.7874	7.6574
	KPSS	27.5527	27.2937	27.4048		26.6523	30.3749	28.1254
	PE-10-9	7.1402	7.3114	7.0257		7.2851	7.7011	7.5498
	PE-10-8	7.2639	7.3829	7.1114		7.3423	7.7947	7.4091
	PE-10-7	9.0314	10.5276	9.6719		9.68	10.9521	9.8894
	PE-10-6	17.1749	19.9831	18.709		19.8812	22.618	21.3487
	PE-10-5	23.5269	24.2603	23.9125		25.2464	28.2036	26.8718
	WASH	7.3671	7.844	7.6751		7.6227	8.3435	7.8824
	PE-10-9	7.2419	7.4948	7.2456		7.4217	8.189	7.7516
	PE-10-8	7.2652	7.5943	7.3645		7.4331	8.2282	7.8035
	PE-10-7	10.0022	12.3298	11.3958		9.8416	11.7132	10.6392
	PE-3x10-6	14.0817	17.9931	16.0611		13.7989	17.1224	15.7793
	PE-10-6	19.4881	22.5098	21.2109		19.1603	23.1632	21.4571
	PE-10-5	22.486	24.2999	23.0996		23.0151	26.6998	24.9152
	WASH	7.3413	8.1129	7.7893		7.5203	8.3202	7.8022
PE-10-6	ACH-10-9	18.0997	19.7843	18.9153		14.4659	20.107	17.4698
	ACH-10-8	18.5298	21.4428	19.9919		15.3375	20.9828	17.9233
	ACH-10-7	15.0582	17.4687	16.0918		12.2984	19.1468	16.3548
	ACH-3x10-6	10.0699	9.7402	10.879		8.2232	12.3829	10.3339
	ACH-10-6	8.3765	8.4484	8.9189		7.2882	9.7359	8.4501
	ACH-10-5	8.0336	8.2706	8.0998		7.2589	8.9818	7.9909
	Percent of Max K-PSS Contraction
		3.67286	3.5736	3.64382		3.51943	3.90052	3.67297
	PE-10-9	25.9147	26.7879	25.6367		27.3339	25.3535	26.8434
	PE-10-8	26.3637	27.0498	25.9495		27.5485	25.6616	26.3431
	PE-10-7	32.7786	38.5715	35.2927		36.3196	36.0564	35.1618
	PE-10-6	62.3347	73.2151	68.2691		74.5947	74.4628	75.9054
	PE-10-5	85.3887	88.8861	87.2566		94.725	92.8517	95.5428
	PE-10-9	26.2838	27.4598	26.4392		27.8464	26.9598	27.5609
	PE-10-8	26.3684	27.8244	26.873		27.8892	27.0888	27.7454
	PE-10-7	36.3021	45.1745	41.5832		36.9259	38.5621	37.8277
	PE-3x10-6	51.1082	65.924	58.6069		51.7738	56.3702	56.1034
	PE-10-6	70.7303	82.4725	77.3985		71.8899	76.2577	76.2908
	PE-10-5	81.6109	89.0312	84.2903		86.3531	87.9009	88.5861
	Percent of PE-10-6
		2.46546	2.43862	2.42837		1.92358	2.41665	2.23909
	ACH-10-9	102.376	108.383	105.692		106.025	104.356	102.596
	ACH-10-8	83.1959	88.2958	85.0729		85.0165	95.2245	93.6176
	ACH-10-7	55.6357	49.232	57.5143		56.8454	61.585	59.1529
	ACH-3x10-6	46.2798	42.7025	47.1518		50.3819	48.4205	48.3698
	ACH-10-6	44.3853	41.8039	42.8214		50.1794	44.67	45.7412
	ACH-10-5	44.3855	41.804	42.804		50.1793	44.6704	45.6704
	Vasocontraction					Vasorelaxation
	Percent of Max K-PSS Contraction					Percent of PE-10-6
		EfCtrl	E3KO				EfCtrl	E3KO
	PE-10-9	26.7276	27.4557			ACH-10-9	105.484	104.326
	PE-10-8	27.0219	27.5744			ACH-10-8	85.5215	91.2862
	PE-10-7	41.0199	37.7719			ACH-10-7	54.1273	59.1945
	PE-3x10-6	58.5464	54.7491			ACH-3x10-6	45.378	49.0574
	PE-10-6	76.8671	74.8128			ACH-10-6	43.0035	46.8635
	PE-10-5	84.9775	87.6134			ACH-10-5	42.9978	46.8401
		SEM	SEM				SEM	SEM
	PE-10-9	0.368846	0.261293			ACH-10-9	1.73708	0.990067
	PE-10-8	0.426851	0.246339			ACH-10-8	1.48921	3.16899
	PE-10-7	2.5767	0.473157			ACH-10-7	2.50703	1.36837
	PE-3x10-6	4.27705	1.48967			ACH-3x10-6	1.36122	0.662438
	PE-10-6	3.40009	1.4615			ACH-10-6	0.750731	1.68651
	PE-10-5	2.16943	0.660436			ACH-10-5	0.751491	1.69439
		Ttest					Ttest
	PE-10-9	0.182535				ACH-10-9	0.59352
	PE-10-8	0.324995				ACH-10-8	0.175035
	PE-10-7	0.28281				ACH-10-7	0.150716
	PE-3x10-6	0.448973				ACH-3x10-6	0.0719455
	PE-10-6	0.608416				ACH-10-6	0.104717
	PE-10-5	0.309714				ACH-10-5	0.10688
		EfCtrl vs. E3KO					EfCtrl vs. E3KO
