# Supplementary material for: Suppression of ischemia in arterial occlusive disease by JNK-promoted native collateral artery development
Source: eLife. 2016 Aug 9;5:e18414. doi: 10.7554/eLife.18414 (PMC4999312; doi:10.7554/eLife.18414)
Supplement: Figure 1—figure supplement 8—source data 1. — This file contains raw source data used to make the graphs presented in Figure 1—figure supplement 8. DOI: http://dx.doi.org/10.7554/eLife.18414.020 [file elife-18414-fig1-figsupp8-data1.xlsx]

## Sheet: Panel B
																Averages of Technical Replicates	Average of Biological Replicates
															Biological Replicates
Well	Sample Name	Target Name	Task	Reporter	Quencher	CT		ΔCт	RQ	AVE RQ	SE RQ	Normalized Ave RQ	Norm SE RQ								Adductor		Calf
I1	ECtrl Control Adductor	CDH5	UNKNOWN	FAM	NFQ-MGB	22.908				0.00143612	6.80014e-05	1	0.0473507		1	0.00156902	Actual	0.00143612			Control	Ligated	Control	Ligated
I1	ECtrl Control Adductor	18S	UNKNOWN	VIC	NFQ-MGB	13.892		9.016	0.00193158						2	0.00176552	Normalized	1		ECtrl	1	1.17159	1	1.1979
I2	ECtrl Control Adductor	CDH5	UNKNOWN	FAM	NFQ-MGB	22.974									3	0.0012866	Actual SEM	6.80265e-05		EfCtrl	1.03496	1.46488	0.954966	1.38228
I2	ECtrl Control Adductor	18S	UNKNOWN	VIC	NFQ-MGB	13.279		9.695	0.00120646						4	0.00126942	Normalized SEM	0.0473682		E3KO	1.03959	1.53079	1.42406	2.49569
J1	ECtrl Control Adductor	CDH5	UNKNOWN	FAM	NFQ-MGB	23.597									5	0.00131081		Ttest
J1	ECtrl Control Adductor	18S	UNKNOWN	VIC	NFQ-MGB	14.58		9.017	0.00193025						6	0.00145837	ECtrl. vs. EfCtrl	0.696268			SEM	SEM	SEM	SEM
J2	ECtrl Control Adductor	CDH5	UNKNOWN	FAM	NFQ-MGB	23.623									7	0.00139311	ECtrl. vs. E3KO	0.578007		ECtrl	0.0473682	0.0728763	0.0401048	0.0665925
J2	ECtrl Control Adductor	18S	UNKNOWN	VIC	NFQ-MGB	14.336		9.287	0.00160079								EfCtrl. vs. E3KO	0.959326		EfCtrl	0.0680846	0.10969	0.0457481	0.123466
K1	ECtrl Control Adductor	CDH5	UNKNOWN	FAM	NFQ-MGB	22.931														E3KO	0.050497	0.123143	0.133363	0.520916
K1	ECtrl Control Adductor	18S	UNKNOWN	VIC	NFQ-MGB	13.3		9.631	0.00126119
K2	ECtrl Control Adductor	CDH5	UNKNOWN	FAM	NFQ-MGB	22.905
K2	ECtrl Control Adductor	18S	UNKNOWN	VIC	NFQ-MGB	13.331		9.574	0.00131201
L1	ECtrl Control Adductor	CDH5	UNKNOWN	FAM	NFQ-MGB	23.373
L1	ECtrl Control Adductor	18S	UNKNOWN	VIC	NFQ-MGB	13.993		9.38	0.00150086
L2	ECtrl Control Adductor	CDH5	UNKNOWN	FAM	NFQ-MGB	23.411
L2	ECtrl Control Adductor	18S	UNKNOWN	VIC	NFQ-MGB	13.499		9.912	0.00103798
M1	ECtrl Control Adductor	CDH5	UNKNOWN	FAM	NFQ-MGB	23.571
M1	ECtrl Control Adductor	18S	UNKNOWN	VIC	NFQ-MGB	14.039		9.532	0.00135077
M2	ECtrl Control Adductor	CDH5	UNKNOWN	FAM	NFQ-MGB	23.599
M2	ECtrl Control Adductor	18S	UNKNOWN	VIC	NFQ-MGB	13.979		9.62	0.00127084
N1	ECtrl Control Adductor	CDH5	UNKNOWN	FAM	NFQ-MGB	22.885
N1	ECtrl Control Adductor	18S	UNKNOWN	VIC	NFQ-MGB	13.568		9.317	0.00156785
N2	ECtrl Control Adductor	CDH5	UNKNOWN	FAM	NFQ-MGB	22.947
N2	ECtrl Control Adductor	18S	UNKNOWN	VIC	NFQ-MGB	13.413		9.534	0.0013489
O1	ECtrl Control Adductor	CDH5	UNKNOWN	FAM	NFQ-MGB	23.347
O1	ECtrl Control Adductor	18S	UNKNOWN	VIC	NFQ-MGB	13.868		9.479	0.00140132
O2	ECtrl Control Adductor	CDH5	UNKNOWN	FAM	NFQ-MGB	23.387										Average of Technical Replicates	Average of Biological Replicates
O2	ECtrl Control Adductor	18S	UNKNOWN	VIC	NFQ-MGB	13.891		9.496	0.0013849						Biological Replicates
I9	EfCtrl Control Adductor	CDH5	UNKNOWN	FAM	NFQ-MGB	23.035				0.00148633	7.98359e-05	1.03496	0.0555913		1	0.0017079	Actual	0.00148633
I9	EfCtrl Control Adductor	18S	UNKNOWN	VIC	NFQ-MGB	13.682		9.353	0.00152921						2	0.00206762	Normalized	1.03496
I10	EfCtrl Control Adductor	CDH5	UNKNOWN	FAM	NFQ-MGB	23.017									3	0.00140393	Actual SEM	0.000101196
I10	EfCtrl Control Adductor	18S	UNKNOWN	VIC	NFQ-MGB	13.967		9.05	0.00188659						4	0.00151261	Normalized SEM	0.0680846
J9	EfCtrl Control Adductor	CDH5	UNKNOWN	FAM	NFQ-MGB	22.721									5	0.00144838
J9	EfCtrl Control Adductor	18S	UNKNOWN	VIC	NFQ-MGB	13.909		8.812	0.00222497						6	0.001225
J10	EfCtrl Control Adductor	CDH5	UNKNOWN	FAM	NFQ-MGB	22.765									7	0.00133019
J10	EfCtrl Control Adductor	18S	UNKNOWN	VIC	NFQ-MGB	13.733		9.032	0.00191028						8	0.00119498
K9	EfCtrl Control Adductor	CDH5	UNKNOWN	FAM	NFQ-MGB	22.973
K9	EfCtrl Control Adductor	18S	UNKNOWN	VIC	NFQ-MGB	13.264		9.709	0.00119481
K10	EfCtrl Control Adductor	CDH5	UNKNOWN	FAM	NFQ-MGB	23.035
K10	EfCtrl Control Adductor	18S	UNKNOWN	VIC	NFQ-MGB	13.759		9.276	0.00161304
L9	EfCtrl Control Adductor	CDH5	UNKNOWN	FAM	NFQ-MGB	23.161
L9	EfCtrl Control Adductor	18S	UNKNOWN	VIC	NFQ-MGB	13.765		9.396	0.0014843
L10	EfCtrl Control Adductor	CDH5	UNKNOWN	FAM	NFQ-MGB	23.184
L10	EfCtrl Control Adductor	18S	UNKNOWN	VIC	NFQ-MGB	13.842		9.342	0.00154091
M9	EfCtrl Control Adductor	CDH5	UNKNOWN	FAM	NFQ-MGB	23.132
M9	EfCtrl Control Adductor	18S	UNKNOWN	VIC	NFQ-MGB	13.892		9.24	0.0016538
M10	EfCtrl Control Adductor	CDH5	UNKNOWN	FAM	NFQ-MGB	23.046
M10	EfCtrl Control Adductor	18S	UNKNOWN	VIC	NFQ-MGB	13.394		9.652	0.00124296
N9	EfCtrl Control Adductor	CDH5	UNKNOWN	FAM	NFQ-MGB	22.868
N9	EfCtrl Control Adductor	18S	UNKNOWN	VIC	NFQ-MGB	13.193		9.675	0.0012233
N10	EfCtrl Control Adductor	CDH5	UNKNOWN	FAM	NFQ-MGB	22.888
N10	EfCtrl Control Adductor	18S	UNKNOWN	VIC	NFQ-MGB	13.217		9.671	0.0012267
O9	EfCtrl Control Adductor	CDH5	UNKNOWN	FAM	NFQ-MGB	22.808
O9	EfCtrl Control Adductor	18S	UNKNOWN	VIC	NFQ-MGB	13.222		9.586	0.00130115
O10	EfCtrl Control Adductor	CDH5	UNKNOWN	FAM	NFQ-MGB	22.782
O10	EfCtrl Control Adductor	18S	UNKNOWN	VIC	NFQ-MGB	13.259		9.523	0.00135923
P9	EfCtrl Control Adductor	CDH5	UNKNOWN	FAM	NFQ-MGB	22.864
P9	EfCtrl Control Adductor	18S	UNKNOWN	VIC	NFQ-MGB	12.866		9.998	0.000977917
P10	EfCtrl Control Adductor	CDH5	UNKNOWN	FAM	NFQ-MGB	22.908										Average of Technical Replicates	Average of Biological Replicates
P10	EfCtrl Control Adductor	18S	UNKNOWN	VIC	NFQ-MGB	13.44		9.468	0.00141204						Biological Replicates
I17	E3KO Control Adductor	CDH5	UNKNOWN	FAM	NFQ-MGB	22.995				0.00149298	5.84345e-05	1.03959	0.0406891		1	0.00148445	Actual	0.00149298
I17	E3KO Control Adductor	18S	UNKNOWN	VIC	NFQ-MGB	13.413		9.582	0.00130476						2	0.00138804	Normalized	1.03959
I18	E3KO Control Adductor	CDH5	UNKNOWN	FAM	NFQ-MGB	23.037									3	0.00180199	Actual SEM	7.25199e-05
I18	E3KO Control Adductor	18S	UNKNOWN	VIC	NFQ-MGB	13.806		9.231	0.00166415						4	0.00159741	Normalized SEM	0.050497
J17	E3KO Control Adductor	CDH5	UNKNOWN	FAM	NFQ-MGB	22.787									5	0.0012459
J17	E3KO Control Adductor	18S	UNKNOWN	VIC	NFQ-MGB	13.401		9.386	0.00149463						6	0.00160962
J18	E3KO Control Adductor	CDH5	UNKNOWN	FAM	NFQ-MGB	22.843									7	0.00132343
J18	E3KO Control Adductor	18S	UNKNOWN	VIC	NFQ-MGB	13.235		9.608	0.00128146
K17	E3KO Control Adductor	CDH5	UNKNOWN	FAM	NFQ-MGB	22.815
K17	E3KO Control Adductor	18S	UNKNOWN	VIC	NFQ-MGB	13.759		9.056	0.00187876
K18	E3KO Control Adductor	CDH5	UNKNOWN	FAM	NFQ-MGB	22.858
K18	E3KO Control Adductor	18S	UNKNOWN	VIC	NFQ-MGB	13.679		9.179	0.00172522
L17	E3KO Control Adductor	CDH5	UNKNOWN	FAM	NFQ-MGB	22.438
L17	E3KO Control Adductor	18S	UNKNOWN	VIC	NFQ-MGB	13.268		9.17	0.00173602
L18	E3KO Control Adductor	CDH5	UNKNOWN	FAM	NFQ-MGB	22.616
L18	E3KO Control Adductor	18S	UNKNOWN	VIC	NFQ-MGB	13.195		9.421	0.0014588
M17	E3KO Control Adductor	CDH5	UNKNOWN	FAM	NFQ-MGB	22.977
M17	E3KO Control Adductor	18S	UNKNOWN	VIC	NFQ-MGB	13.417		9.56	0.00132481
M18	E3KO Control Adductor	CDH5	UNKNOWN	FAM	NFQ-MGB	23.038
M18	E3KO Control Adductor	18S	UNKNOWN	VIC	NFQ-MGB	13.295		9.743	0.00116698
N17	E3KO Control Adductor	CDH5	UNKNOWN	FAM	NFQ-MGB	22.634
N17	E3KO Control Adductor	18S	UNKNOWN	VIC	NFQ-MGB	13.39		9.244	0.00164922
N18	E3KO Control Adductor	CDH5	UNKNOWN	FAM	NFQ-MGB	22.711
N18	E3KO Control Adductor	18S	UNKNOWN	VIC	NFQ-MGB	13.396		9.315	0.00157002
O17	E3KO Control Adductor	CDH5	UNKNOWN	FAM	NFQ-MGB	23.147
O17	E3KO Control Adductor	18S	UNKNOWN	VIC	NFQ-MGB	13.706		9.441	0.00143872
O18	E3KO Control Adductor	CDH5	UNKNOWN	FAM	NFQ-MGB	23.15										Average of Technical Replicates	Average of Biological Replicates
O18	E3KO Control Adductor	18S	UNKNOWN	VIC	NFQ-MGB	13.457		9.693	0.00120814						Biological Replicates
I3	ECtrl Ligated Adductor	CDH5	UNKNOWN	FAM	NFQ-MGB	22.663				0.00168254	8.05452e-05	1.17159	0.0560852		1	0.001853	Actual	0.00168254
I3	ECtrl Ligated Adductor	18S	UNKNOWN	VIC	NFQ-MGB	13.416		9.247	0.00164579						2	0.00156382	Normalized	1.17159
I4	ECtrl Ligated Adductor	CDH5	UNKNOWN	FAM	NFQ-MGB	22.625									3	0.00221638	Actual SEM	0.000104659
I4	ECtrl Ligated Adductor	18S	UNKNOWN	VIC	NFQ-MGB	13.702		8.923	0.0020602						4	0.00140458	Normalized SEM	0.0728763
J3	ECtrl Ligated Adductor	CDH5	UNKNOWN	FAM	NFQ-MGB	22.625									5	0.00168726		Ttest
J3	ECtrl Ligated Adductor	18S	UNKNOWN	VIC	NFQ-MGB	13.242		9.383	0.00149774						6	0.00158048	ECtrl. vs. EfCtrl	0.0502586
J4	ECtrl Ligated Adductor	CDH5	UNKNOWN	FAM	NFQ-MGB	22.618									7	0.00147226	ECtrl. vs. E3KO	0.0273923
J4	ECtrl Ligated Adductor	18S	UNKNOWN	VIC	NFQ-MGB	13.357		9.261	0.0016299								EfCtrl. vs. E3KO	0.694874
K3	ECtrl Ligated Adductor	CDH5	UNKNOWN	FAM	NFQ-MGB	22.616
K3	ECtrl Ligated Adductor	18S	UNKNOWN	VIC	NFQ-MGB	13.746		8.87	0.00213729
K4	ECtrl Ligated Adductor	CDH5	UNKNOWN	FAM	NFQ-MGB	22.633
K4	ECtrl Ligated Adductor	18S	UNKNOWN	VIC	NFQ-MGB	13.866		8.767	0.00229546
L3	ECtrl Ligated Adductor	CDH5	UNKNOWN	FAM	NFQ-MGB	22.656
L3	ECtrl Ligated Adductor	18S	UNKNOWN	VIC	NFQ-MGB	13.212		9.444	0.00143573
L4	ECtrl Ligated Adductor	CDH5	UNKNOWN	FAM	NFQ-MGB	22.609
L4	ECtrl Ligated Adductor	18S	UNKNOWN	VIC	NFQ-MGB	13.101		9.508	0.00137343
M3	ECtrl Ligated Adductor	CDH5	UNKNOWN	FAM	NFQ-MGB	22.813
M3	ECtrl Ligated Adductor	18S	UNKNOWN	VIC	NFQ-MGB	13.809		9.004	0.00194772
M4	ECtrl Ligated Adductor	CDH5	UNKNOWN	FAM	NFQ-MGB	22.746
M4	ECtrl Ligated Adductor	18S	UNKNOWN	VIC	NFQ-MGB	13.293		9.453	0.0014268
N3	ECtrl Ligated Adductor	CDH5	UNKNOWN	FAM	NFQ-MGB	22.541
N3	ECtrl Ligated Adductor	18S	UNKNOWN	VIC	NFQ-MGB	13.156		9.385	0.00149566
N4	ECtrl Ligated Adductor	CDH5	UNKNOWN	FAM	NFQ-MGB	22.478
N4	ECtrl Ligated Adductor	18S	UNKNOWN	VIC	NFQ-MGB	13.248		9.23	0.0016653
O3	ECtrl Ligated Adductor	CDH5	UNKNOWN	FAM	NFQ-MGB	22.902
O3	ECtrl Ligated Adductor	18S	UNKNOWN	VIC	NFQ-MGB	13.467		9.435	0.00144471
O4	ECtrl Ligated Adductor	CDH5	UNKNOWN	FAM	NFQ-MGB	22.859										Average of Technical Replicates	Average of Biological Replicates
O4	ECtrl Ligated Adductor	18S	UNKNOWN	VIC	NFQ-MGB	13.478		9.381	0.00149982						Biological Replicates
I11	EfCtrl Ligated Adductor	CDH5	UNKNOWN	FAM	NFQ-MGB	22.377				0.00210374	0.000116006	1.46488	0.0807776		1	0.00226078	Actual	0.00210374
I11	EfCtrl Ligated Adductor	18S	UNKNOWN	VIC	NFQ-MGB	13.456		8.921	0.00206306						2	0.00288145	Normalized	1.46488
I12	EfCtrl Ligated Adductor	CDH5	UNKNOWN	FAM	NFQ-MGB	22.384									3	0.0025249	Actual SEM	0.000157528
I12	EfCtrl Ligated Adductor	18S	UNKNOWN	VIC	NFQ-MGB	13.716		8.668	0.00245851						4	0.00195855	Normalized SEM	0.10969
J11	EfCtrl Ligated Adductor	CDH5	UNKNOWN	FAM	NFQ-MGB	22.201									5	0.00172168
J11	EfCtrl Ligated Adductor	18S	UNKNOWN	VIC	NFQ-MGB	13.756		8.445	0.00286947						6	0.00217859
J12	EfCtrl Ligated Adductor	CDH5	UNKNOWN	FAM	NFQ-MGB	22.222									7	0.00162066
J12	EfCtrl Ligated Adductor	18S	UNKNOWN	VIC	NFQ-MGB	13.789		8.433	0.00289344						8	0.00168331
K11	EfCtrl Ligated Adductor	CDH5	UNKNOWN	FAM	NFQ-MGB	22.305
K11	EfCtrl Ligated Adductor	18S	UNKNOWN	VIC	NFQ-MGB	13.589		8.716	0.00237806
K12	EfCtrl Ligated Adductor	CDH5	UNKNOWN	FAM	NFQ-MGB	22.359
K12	EfCtrl Ligated Adductor	18S	UNKNOWN	VIC	NFQ-MGB	13.811		8.548	0.00267175
L11	EfCtrl Ligated Adductor	CDH5	UNKNOWN	FAM	NFQ-MGB	22.474
L11	EfCtrl Ligated Adductor	18S	UNKNOWN	VIC	NFQ-MGB	13.48		8.994	0.00196126
L12	EfCtrl Ligated Adductor	CDH5	UNKNOWN	FAM	NFQ-MGB	22.505
L12	EfCtrl Ligated Adductor	18S	UNKNOWN	VIC	NFQ-MGB	13.507		8.998	0.00195584
M11	EfCtrl Ligated Adductor	CDH5	UNKNOWN	FAM	NFQ-MGB	22.744
M11	EfCtrl Ligated Adductor	18S	UNKNOWN	VIC	NFQ-MGB	13.783		8.961	0.00200664
M12	EfCtrl Ligated Adductor	CDH5	UNKNOWN	FAM	NFQ-MGB	22.789
M12	EfCtrl Ligated Adductor	18S	UNKNOWN	VIC	NFQ-MGB	13.346		9.443	0.00143673
N11	EfCtrl Ligated Adductor	CDH5	UNKNOWN	FAM	NFQ-MGB	22.458
N11	EfCtrl Ligated Adductor	18S	UNKNOWN	VIC	NFQ-MGB	13.732		8.726	0.00236163
N12	EfCtrl Ligated Adductor	CDH5	UNKNOWN	FAM	NFQ-MGB	22.501
N12	EfCtrl Ligated Adductor	18S	UNKNOWN	VIC	NFQ-MGB	13.532		8.969	0.00199555
O11	EfCtrl Ligated Adductor	CDH5	UNKNOWN	FAM	NFQ-MGB	22.59
O11	EfCtrl Ligated Adductor	18S	UNKNOWN	VIC	NFQ-MGB	13.272		9.318	0.00156676
O12	EfCtrl Ligated Adductor	CDH5	UNKNOWN	FAM	NFQ-MGB	22.611
O12	EfCtrl Ligated Adductor	18S	UNKNOWN	VIC	NFQ-MGB	13.389		9.222	0.00167456
P11	EfCtrl Ligated Adductor	CDH5	UNKNOWN	FAM	NFQ-MGB	22.787
P11	EfCtrl Ligated Adductor	18S	UNKNOWN	VIC	NFQ-MGB	13.747		9.04	0.00189972
P12	EfCtrl Ligated Adductor	CDH5	UNKNOWN	FAM	NFQ-MGB	22.809										Average of Technical Replicates	Average of Biological Replicates
P12	EfCtrl Ligated Adductor	18S	UNKNOWN	VIC	NFQ-MGB	13.396		9.413	0.00146691						Biological Replicates
I19	E3KO Ligated Adductor	CDH5	UNKNOWN	FAM	NFQ-MGB	22.186				0.0021984	0.000132467	1.53079	0.0922395		1	0.00218822	Actual	0.0021984
I19	E3KO Ligated Adductor	18S	UNKNOWN	VIC	NFQ-MGB	13.402		8.784	0.00226857						2	0.00136538	Normalized	1.53079
I20	E3KO Ligated Adductor	CDH5	UNKNOWN	FAM	NFQ-MGB	22.189									3	0.00262437	Actual SEM	0.000176848
I20	E3KO Ligated Adductor	18S	UNKNOWN	VIC	NFQ-MGB	13.299		8.89	0.00210787						4	0.00256913	Normalized SEM	0.123143
J19	E3KO Ligated Adductor	CDH5	UNKNOWN	FAM	NFQ-MGB	22.857									5	0.0017704
J19	E3KO Ligated Adductor	18S	UNKNOWN	VIC	NFQ-MGB	13.334		9.523	0.00135922						6	0.00248503
J20	E3KO Ligated Adductor	CDH5	UNKNOWN	FAM	NFQ-MGB	22.866									7	0.00238627
J20	E3KO Ligated Adductor	18S	UNKNOWN	VIC	NFQ-MGB	13.356		9.51	0.00137153
K19	E3KO Ligated Adductor	CDH5	UNKNOWN	FAM	NFQ-MGB	22.354
K19	E3KO Ligated Adductor	18S	UNKNOWN	VIC	NFQ-MGB	13.735		8.619	0.00254344
K20	E3KO Ligated Adductor	CDH5	UNKNOWN	FAM	NFQ-MGB	22.356
K20	E3KO Ligated Adductor	18S	UNKNOWN	VIC	NFQ-MGB	13.826		8.53	0.00270529
L19	E3KO Ligated Adductor	CDH5	UNKNOWN	FAM	NFQ-MGB	22.181
L19	E3KO Ligated Adductor	18S	UNKNOWN	VIC	NFQ-MGB	13.433		8.748	0.00232589
L20	E3KO Ligated Adductor	CDH5	UNKNOWN	FAM	NFQ-MGB	22.173
L20	E3KO Ligated Adductor	18S	UNKNOWN	VIC	NFQ-MGB	13.699		8.474	0.00281237
M19	E3KO Ligated Adductor	CDH5	UNKNOWN	FAM	NFQ-MGB	22.863
M19	E3KO Ligated Adductor	18S	UNKNOWN	VIC	NFQ-MGB	13.659		9.204	0.00169559
M20	E3KO Ligated Adductor	CDH5	UNKNOWN	FAM	NFQ-MGB	22.977
M20	E3KO Ligated Adductor	18S	UNKNOWN	VIC	NFQ-MGB	13.895		9.082	0.00184521
N19	E3KO Ligated Adductor	CDH5	UNKNOWN	FAM	NFQ-MGB	22.23
N19	E3KO Ligated Adductor	18S	UNKNOWN	VIC	NFQ-MGB	13.293		8.937	0.00204031
N20	E3KO Ligated Adductor	CDH5	UNKNOWN	FAM	NFQ-MGB	22.212
N20	E3KO Ligated Adductor	18S	UNKNOWN	VIC	NFQ-MGB	13.797		8.415	0.00292976
O19	E3KO Ligated Adductor	CDH5	UNKNOWN	FAM	NFQ-MGB	22.295
O19	E3KO Ligated Adductor	18S	UNKNOWN	VIC	NFQ-MGB	13.636		8.659	0.00247389
O20	E3KO Ligated Adductor	CDH5	UNKNOWN	FAM	NFQ-MGB	22.252										Average of Technical Replicates	Average of Biological Replicates
O20	E3KO Ligated Adductor	18S	UNKNOWN	VIC	NFQ-MGB	13.487		8.765	0.00229865						Biological Replicates
I5	ECtrl Control Calf	CDH5	UNKNOWN	FAM	NFQ-MGB	22.841				0.0016106	5.62973e-05	1	0.0349541		1	0.00163672	Actual	0.0016106
I5	ECtrl Control Calf	18S	UNKNOWN	VIC	NFQ-MGB	13.726		9.115	0.00180348						2	0.00151572	Normalized	1
I6	ECtrl Control Calf	CDH5	UNKNOWN	FAM	NFQ-MGB	22.837									3	0.00189489	Actual SEM	6.4593e-05
I6	ECtrl Control Calf	18S	UNKNOWN	VIC	NFQ-MGB	13.427		9.41	0.00146997						4	0.00151915	Normalized SEM	0.0401048
J5	ECtrl Control Calf	CDH5	UNKNOWN	FAM	NFQ-MGB	22.69									5	0.00136709		Ttest
J5	ECtrl Control Calf	18S	UNKNOWN	VIC	NFQ-MGB	13.369		9.321	0.00156351						6	0.00159987	ECtrl. vs. EfCtrl	0.465929
J6	ECtrl Control Calf	CDH5	UNKNOWN	FAM	NFQ-MGB	22.721									7	0.0017408	ECtrl. vs. E3KO	0.0101787
J6	ECtrl Control Calf	18S	UNKNOWN	VIC	NFQ-MGB	13.309		9.412	0.00146793								EfCtrl. vs. E3KO	0.00364939
K5	ECtrl Control Calf	CDH5	UNKNOWN	FAM	NFQ-MGB	22.436
K5	ECtrl Control Calf	18S	UNKNOWN	VIC	NFQ-MGB	13.245		9.191	0.00171093
K6	ECtrl Control Calf	CDH5	UNKNOWN	FAM	NFQ-MGB	22.408
K6	ECtrl Control Calf	18S	UNKNOWN	VIC	NFQ-MGB	13.498		8.91	0.00207885
L5	ECtrl Control Calf	CDH5	UNKNOWN	FAM	NFQ-MGB	22.511
L5	ECtrl Control Calf	18S	UNKNOWN	VIC	NFQ-MGB	12.994		9.517	0.00136489
L6	ECtrl Control Calf	CDH5	UNKNOWN	FAM	NFQ-MGB	22.528
L6	ECtrl Control Calf	18S	UNKNOWN	VIC	NFQ-MGB	13.305		9.223	0.0016734
M5	ECtrl Control Calf	CDH5	UNKNOWN	FAM	NFQ-MGB	22.742
M5	ECtrl Control Calf	18S	UNKNOWN	VIC	NFQ-MGB	13.298		9.444	0.00143573
M6	ECtrl Control Calf	CDH5	UNKNOWN	FAM	NFQ-MGB	22.875
M6	ECtrl Control Calf	18S	UNKNOWN	VIC	NFQ-MGB	13.286		9.589	0.00129844
N5	ECtrl Control Calf	CDH5	UNKNOWN	FAM	NFQ-MGB	22.675
N5	ECtrl Control Calf	18S	UNKNOWN	VIC	NFQ-MGB	13.328		9.347	0.00153558
N6	ECtrl Control Calf	CDH5	UNKNOWN	FAM	NFQ-MGB	22.74
N6	ECtrl Control Calf	18S	UNKNOWN	VIC	NFQ-MGB	13.509		9.231	0.00166415
O5	ECtrl Control Calf	CDH5	UNKNOWN	FAM	NFQ-MGB	22.509
O5	ECtrl Control Calf	18S	UNKNOWN	VIC	NFQ-MGB	13.232		9.277	0.00161192
O6	ECtrl Control Calf	CDH5	UNKNOWN	FAM	NFQ-MGB	22.566										Average of Technical Replicates	Average of Biological Replicates
O6	ECtrl Control Calf	18S	UNKNOWN	VIC	NFQ-MGB	13.503		9.063	0.00186967						Biological Replicates
I13	EfCtrl Control Calf	CDH5	UNKNOWN	FAM	NFQ-MGB	22.75				0.00153807	5.96856e-05	0.954966	0.0370579		1	0.00153234	Actual	0.00153807
I13	EfCtrl Control Calf	18S	UNKNOWN	VIC	NFQ-MGB	13.323		9.427	0.00145275						2	0.00186421	Normalized	0.954966
I14	EfCtrl Control Calf	CDH5	UNKNOWN	FAM	NFQ-MGB	22.769									3	0.00174312	Actual SEM	7.03639e-05
I14	EfCtrl Control Calf	18S	UNKNOWN	VIC	NFQ-MGB	13.492		9.277	0.00161193						4	0.00152661	Normalized SEM	0.0457481
J13	EfCtrl Control Calf	CDH5	UNKNOWN	FAM	NFQ-MGB	22.684									5	0.00130037
J13	EfCtrl Control Calf	18S	UNKNOWN	VIC	NFQ-MGB	13.75		8.934	0.00204455						6	0.00130005
J14	EfCtrl Control Calf	CDH5	UNKNOWN	FAM	NFQ-MGB	22.746									7	0.00160494
J14	EfCtrl Control Calf	18S	UNKNOWN	VIC	NFQ-MGB	13.532		9.214	0.00168387						8	0.00143294
K13	EfCtrl Control Calf	CDH5	UNKNOWN	FAM	NFQ-MGB	22.757
K13	EfCtrl Control Calf	18S	UNKNOWN	VIC	NFQ-MGB	13.695		9.062	0.00187097
K14	EfCtrl Control Calf	CDH5	UNKNOWN	FAM	NFQ-MGB	22.826
K14	EfCtrl Control Calf	18S	UNKNOWN	VIC	NFQ-MGB	13.552		9.274	0.00161528
L13	EfCtrl Control Calf	CDH5	UNKNOWN	FAM	NFQ-MGB	23.215
L13	EfCtrl Control Calf	18S	UNKNOWN	VIC	NFQ-MGB	14.004		9.211	0.00168738
L14	EfCtrl Control Calf	CDH5	UNKNOWN	FAM	NFQ-MGB	23.04
L14	EfCtrl Control Calf	18S	UNKNOWN	VIC	NFQ-MGB	13.524		9.516	0.00136584
M13	EfCtrl Control Calf	CDH5	UNKNOWN	FAM	NFQ-MGB	22.826
M13	EfCtrl Control Calf	18S	UNKNOWN	VIC	NFQ-MGB	13.411		9.415	0.00146488
M14	EfCtrl Control Calf	CDH5	UNKNOWN	FAM	NFQ-MGB	22.928
M14	EfCtrl Control Calf	18S	UNKNOWN	VIC	NFQ-MGB	13.146		9.782	0.00113586
N13	EfCtrl Control Calf	CDH5	UNKNOWN	FAM	NFQ-MGB	22.852
N13	EfCtrl Control Calf	18S	UNKNOWN	VIC	NFQ-MGB	13.293		9.559	0.00132573
N14	EfCtrl Control Calf	CDH5	UNKNOWN	FAM	NFQ-MGB	22.975
N14	EfCtrl Control Calf	18S	UNKNOWN	VIC	NFQ-MGB	13.359		9.616	0.00127437
O13	EfCtrl Control Calf	CDH5	UNKNOWN	FAM	NFQ-MGB	22.853
O13	EfCtrl Control Calf	18S	UNKNOWN	VIC	NFQ-MGB	13.682		9.171	0.00173482
O14	EfCtrl Control Calf	CDH5	UNKNOWN	FAM	NFQ-MGB	22.901
O14	EfCtrl Control Calf	18S	UNKNOWN	VIC	NFQ-MGB	13.496		9.405	0.00147507
P13	EfCtrl Control Calf	CDH5	UNKNOWN	FAM	NFQ-MGB	22.935
P13	EfCtrl Control Calf	18S	UNKNOWN	VIC	NFQ-MGB	13.638		9.297	0.00158973
P14	EfCtrl Control Calf	CDH5	UNKNOWN	FAM	NFQ-MGB	22.967										Average of Technical Replicates	Average of Biological Replicates
P14	EfCtrl Control Calf	18S	UNKNOWN	VIC	NFQ-MGB	13.353		9.614	0.00127614						Biological Replicates
I21	E3KO Control Calf	CDH5	UNKNOWN	FAM	NFQ-MGB	22.748				0.00229359	0.000149344	1.42406	0.0927252		1	0.00353292	Actual	0.00229359
I21	E3KO Control Calf	18S	UNKNOWN	VIC	NFQ-MGB	14.669		8.079	0.0036981						2	0.00199364	Normalized	1.42406
I22	E3KO Control Calf	CDH5	UNKNOWN	FAM	NFQ-MGB	22.76									3	0.00228938	Actual SEM	0.000214795
I22	E3KO Control Calf	18S	UNKNOWN	VIC	NFQ-MGB	14.546		8.214	0.00336775						4	0.00230393	Normalized SEM	0.133363
J21	E3KO Control Calf	CDH5	UNKNOWN	FAM	NFQ-MGB	22.802									5	0.00202695
J21	E3KO Control Calf	18S	UNKNOWN	VIC	NFQ-MGB	13.85		8.952	0.0020192						6	0.00202542
J22	E3KO Control Calf	CDH5	UNKNOWN	FAM	NFQ-MGB	22.735									7	0.00188287
J22	E3KO Control Calf	18S	UNKNOWN	VIC	NFQ-MGB	13.746		8.989	0.00196807
K21	E3KO Control Calf	CDH5	UNKNOWN	FAM	NFQ-MGB	22.809
K21	E3KO Control Calf	18S	UNKNOWN	VIC	NFQ-MGB	13.967		8.842	0.00217918
K22	E3KO Control Calf	CDH5	UNKNOWN	FAM	NFQ-MGB	22.761
K22	E3KO Control Calf	18S	UNKNOWN	VIC	NFQ-MGB	14.058		8.703	0.00239958
L21	E3KO Control Calf	CDH5	UNKNOWN	FAM	NFQ-MGB	22.744
L21	E3KO Control Calf	18S	UNKNOWN	VIC	NFQ-MGB	14.03		8.714	0.00238136
L22	E3KO Control Calf	CDH5	UNKNOWN	FAM	NFQ-MGB	22.823
L22	E3KO Control Calf	18S	UNKNOWN	VIC	NFQ-MGB	14.012		8.811	0.00222651
M21	E3KO Control Calf	CDH5	UNKNOWN	FAM	NFQ-MGB	22.707
M21	E3KO Control Calf	18S	UNKNOWN	VIC	NFQ-MGB	13.769		8.938	0.00203889
M22	E3KO Control Calf	CDH5	UNKNOWN	FAM	NFQ-MGB	22.748
M22	E3KO Control Calf	18S	UNKNOWN	VIC	NFQ-MGB	13.793		8.955	0.00201501
N21	E3KO Control Calf	CDH5	UNKNOWN	FAM	NFQ-MGB	22.684
N21	E3KO Control Calf	18S	UNKNOWN	VIC	NFQ-MGB	13.577		9.107	0.00181351
N22	E3KO Control Calf	CDH5	UNKNOWN	FAM	NFQ-MGB	22.671
N22	E3KO Control Calf	18S	UNKNOWN	VIC	NFQ-MGB	13.867		8.804	0.00223734
O21	E3KO Control Calf	CDH5	UNKNOWN	FAM	NFQ-MGB	22.842
O21	E3KO Control Calf	18S	UNKNOWN	VIC	NFQ-MGB	13.768		9.074	0.00185547
O22	E3KO Control Calf	CDH5	UNKNOWN	FAM	NFQ-MGB	22.833										Average of Technical Replicates	Average of Biological Replicates
O22	E3KO Control Calf	18S	UNKNOWN	VIC	NFQ-MGB	13.801		9.032	0.00191028						Biological Replicates
I7	ECtrl Ligated Calf	CDH5	UNKNOWN	FAM	NFQ-MGB	22.703				0.00192935	8.07991e-05	1.1979	0.050167		1	0.001918	Actual	0.00192935
I7	ECtrl Ligated Calf	18S	UNKNOWN	VIC	NFQ-MGB	13.463		9.24	0.0016538						2	0.00195848	Normalized	1.1979
I8	ECtrl Ligated Calf	CDH5	UNKNOWN	FAM	NFQ-MGB	22.705									3	0.00233131	Actual SEM	0.000107254
I8	ECtrl Ligated Calf	18S	UNKNOWN	VIC	NFQ-MGB	13.865		8.84	0.0021822						4	0.00155812	Normalized SEM	0.0665925
J7	ECtrl Ligated Calf	CDH5	UNKNOWN	FAM	NFQ-MGB	22.359									5	0.00192189		Ttest
J7	ECtrl Ligated Calf	18S	UNKNOWN	VIC	NFQ-MGB	13.232		9.127	0.00178854						6	0.00221038	ECtrl. vs. EfCtrl	0.229965
J8	ECtrl Ligated Calf	CDH5	UNKNOWN	FAM	NFQ-MGB	22.368									7	0.00160724	ECtrl. vs. E3KO	0.0294262
J8	ECtrl Ligated Calf	18S	UNKNOWN	VIC	NFQ-MGB	13.492		8.876	0.00212842								EfCtrl. vs. E3KO	0.0451374
K7	ECtrl Ligated Calf	CDH5	UNKNOWN	FAM	NFQ-MGB	22.053
K7	ECtrl Ligated Calf	18S	UNKNOWN	VIC	NFQ-MGB	13.34		8.713	0.00238301
K8	ECtrl Ligated Calf	CDH5	UNKNOWN	FAM	NFQ-MGB	22.04
K8	ECtrl Ligated Calf	18S	UNKNOWN	VIC	NFQ-MGB	13.263		8.777	0.0022796
L7	ECtrl Ligated Calf	CDH5	UNKNOWN	FAM	NFQ-MGB	22.416
L7	ECtrl Ligated Calf	18S	UNKNOWN	VIC	NFQ-MGB	13.082		9.334	0.00154948
L8	ECtrl Ligated Calf	CDH5	UNKNOWN	FAM	NFQ-MGB	22.49
L8	ECtrl Ligated Calf	18S	UNKNOWN	VIC	NFQ-MGB	13.172		9.318	0.00156676
M7	ECtrl Ligated Calf	CDH5	UNKNOWN	FAM	NFQ-MGB	22.529
M7	ECtrl Ligated Calf	18S	UNKNOWN	VIC	NFQ-MGB	13.479		9.05	0.0018866
M8	ECtrl Ligated Calf	CDH5	UNKNOWN	FAM	NFQ-MGB	22.663
M8	ECtrl Ligated Calf	18S	UNKNOWN	VIC	NFQ-MGB	13.666		8.997	0.00195719
N7	ECtrl Ligated Calf	CDH5	UNKNOWN	FAM	NFQ-MGB	21.948
N7	ECtrl Ligated Calf	18S	UNKNOWN	VIC	NFQ-MGB	13.122		8.826	0.00220348
N8	ECtrl Ligated Calf	CDH5	UNKNOWN	FAM	NFQ-MGB	21.998
N8	ECtrl Ligated Calf	18S	UNKNOWN	VIC	NFQ-MGB	13.181		8.817	0.00221727
O7	ECtrl Ligated Calf	CDH5	UNKNOWN	FAM	NFQ-MGB	22.428
O7	ECtrl Ligated Calf	18S	UNKNOWN	VIC	NFQ-MGB	13.226		9.202	0.00169794
O8	ECtrl Ligated Calf	CDH5	UNKNOWN	FAM	NFQ-MGB	22.54										Average of Technical Replicates	Average of Biological Replicates
O8	ECtrl Ligated Calf	18S	UNKNOWN	VIC	NFQ-MGB	13.175		9.365	0.00151654						Biological Replicates
I15	EfCtrl Ligated Calf	CDH5	UNKNOWN	FAM	NFQ-MGB	22.273				0.0022263	0.000152597	1.38228	0.0947455		1	0.00292069	Actual	0.0022263
I15	EfCtrl Ligated Calf	18S	UNKNOWN	VIC	NFQ-MGB	13.814		8.459	0.00284176						2	0.00308876	Normalized	1.38228
I16	EfCtrl Ligated Calf	CDH5	UNKNOWN	FAM	NFQ-MGB	22.297									3	0.00185483	Actual SEM	0.000198855
I16	EfCtrl Ligated Calf	18S	UNKNOWN	VIC	NFQ-MGB	13.916		8.381	0.00299963						4	0.00183954	Normalized SEM	0.123466
J15	EfCtrl Ligated Calf	CDH5	UNKNOWN	FAM	NFQ-MGB	22.983									5	0.00147032
J15	EfCtrl Ligated Calf	18S	UNKNOWN	VIC	NFQ-MGB	14.876		8.107	0.00362702						6	0.00231991
J16	EfCtrl Ligated Calf	CDH5	UNKNOWN	FAM	NFQ-MGB	22.961									7	0.00192229
J16	EfCtrl Ligated Calf	18S	UNKNOWN	VIC	NFQ-MGB	14.346		8.615	0.00255051						8	0.00239406
K15	EfCtrl Ligated Calf	CDH5	UNKNOWN	FAM	NFQ-MGB	22.64
K15	EfCtrl Ligated Calf	18S	UNKNOWN	VIC	NFQ-MGB	13.648		8.992	0.00196399
K16	EfCtrl Ligated Calf	CDH5	UNKNOWN	FAM	NFQ-MGB	22.685
K16	EfCtrl Ligated Calf	18S	UNKNOWN	VIC	NFQ-MGB	13.523		9.162	0.00174567
L15	EfCtrl Ligated Calf	CDH5	UNKNOWN	FAM	NFQ-MGB	22.397
L15	EfCtrl Ligated Calf	18S	UNKNOWN	VIC	NFQ-MGB	13.324		9.073	0.00185676
L16	EfCtrl Ligated Calf	CDH5	UNKNOWN	FAM	NFQ-MGB	22.461
L16	EfCtrl Ligated Calf	18S	UNKNOWN	VIC	NFQ-MGB	13.361		9.1	0.00182233
M15	EfCtrl Ligated Calf	CDH5	UNKNOWN	FAM	NFQ-MGB	22.673
M15	EfCtrl Ligated Calf	18S	UNKNOWN	VIC	NFQ-MGB	13.312		9.361	0.00152075
M16	EfCtrl Ligated Calf	CDH5	UNKNOWN	FAM	NFQ-MGB	22.72
M16	EfCtrl Ligated Calf	18S	UNKNOWN	VIC	NFQ-MGB	13.26		9.46	0.0014199
N15	EfCtrl Ligated Calf	CDH5	UNKNOWN	FAM	NFQ-MGB	22.559
N15	EfCtrl Ligated Calf	18S	UNKNOWN	VIC	NFQ-MGB	14.011		8.548	0.00267175
N16	EfCtrl Ligated Calf	CDH5	UNKNOWN	FAM	NFQ-MGB	22.61
N16	EfCtrl Ligated Calf	18S	UNKNOWN	VIC	NFQ-MGB	13.621		8.989	0.00196807
O15	EfCtrl Ligated Calf	CDH5	UNKNOWN	FAM	NFQ-MGB	22.364
O15	EfCtrl Ligated Calf	18S	UNKNOWN	VIC	NFQ-MGB	13.301		9.063	0.00186967
O16	EfCtrl Ligated Calf	CDH5	UNKNOWN	FAM	NFQ-MGB	22.373
O16	EfCtrl Ligated Calf	18S	UNKNOWN	VIC	NFQ-MGB	13.389		8.984	0.00197491
P15	EfCtrl Ligated Calf	CDH5	UNKNOWN	FAM	NFQ-MGB	22.347
P15	EfCtrl Ligated Calf	18S	UNKNOWN	VIC	NFQ-MGB	13.393		8.954	0.0020164
P16	EfCtrl Ligated Calf	CDH5	UNKNOWN	FAM	NFQ-MGB	22.389										Average of Technical Replicates	Average of Biological Replicates
P16	EfCtrl Ligated Calf	18S	UNKNOWN	VIC	NFQ-MGB	13.894		8.495	0.00277173						Biological Replicates
I23	E3KO Ligated Calf	CDH5	UNKNOWN	FAM	NFQ-MGB	20.679				0.00401957	0.000590262	2.49569	0.366485		1	0.00856929	Actual	0.00401957
I23	E3KO Ligated Calf	18S	UNKNOWN	VIC	NFQ-MGB	13.615		7.064	0.0074735						2	0.0023319	Normalized	2.49569
I24	E3KO Ligated Calf	CDH5	UNKNOWN	FAM	NFQ-MGB	20.69									3	0.00272328	Actual SEM	0.000838989
I24	E3KO Ligated Calf	18S	UNKNOWN	VIC	NFQ-MGB	13.997		6.693	0.00966509						4	0.00486517	Normalized SEM	0.520916
J23	E3KO Ligated Calf	CDH5	UNKNOWN	FAM	NFQ-MGB	22.537									5	0.00236149
J23	E3KO Ligated Calf	18S	UNKNOWN	VIC	NFQ-MGB	13.93		8.607	0.00256469						6	0.00418485
J24	E3KO Ligated Calf	CDH5	UNKNOWN	FAM	NFQ-MGB	22.542									7	0.00310099
J24	E3KO Ligated Calf	18S	UNKNOWN	VIC	NFQ-MGB	13.646		8.896	0.00209912
K23	E3KO Ligated Calf	CDH5	UNKNOWN	FAM	NFQ-MGB	21.97
K23	E3KO Ligated Calf	18S	UNKNOWN	VIC	NFQ-MGB	13.436		8.534	0.0026978
K24	E3KO Ligated Calf	CDH5	UNKNOWN	FAM	NFQ-MGB	21.965
K24	E3KO Ligated Calf	18S	UNKNOWN	VIC	NFQ-MGB	13.458		8.507	0.00274877
L23	E3KO Ligated Calf	CDH5	UNKNOWN	FAM	NFQ-MGB	20.956
L23	E3KO Ligated Calf	18S	UNKNOWN	VIC	NFQ-MGB	13.064		7.892	0.00420989
L24	E3KO Ligated Calf	CDH5	UNKNOWN	FAM	NFQ-MGB	21.297
L24	E3KO Ligated Calf	18S	UNKNOWN	VIC	NFQ-MGB	13.796		7.501	0.00552044
M23	E3KO Ligated Calf	CDH5	UNKNOWN	FAM	NFQ-MGB	22.52
M23	E3KO Ligated Calf	18S	UNKNOWN	VIC	NFQ-MGB	13.828		8.692	0.00241795
M24	E3KO Ligated Calf	CDH5	UNKNOWN	FAM	NFQ-MGB	22.58
M24	E3KO Ligated Calf	18S	UNKNOWN	VIC	NFQ-MGB	13.819		8.761	0.00230503
N23	E3KO Ligated Calf	CDH5	UNKNOWN	FAM	NFQ-MGB	21.633
N23	E3KO Ligated Calf	18S	UNKNOWN	VIC	NFQ-MGB	13.544		8.089	0.00367256
N24	E3KO Ligated Calf	CDH5	UNKNOWN	FAM	NFQ-MGB	21.638
N24	E3KO Ligated Calf	18S	UNKNOWN	VIC	NFQ-MGB	13.904		7.734	0.00469714
O23	E3KO Ligated Calf	CDH5	UNKNOWN	FAM	NFQ-MGB	22.018
O23	E3KO Ligated Calf	18S	UNKNOWN	VIC	NFQ-MGB	13.875		8.143	0.00353763
O24	E3KO Ligated Calf	CDH5	UNKNOWN	FAM	NFQ-MGB	22.074
O24	E3KO Ligated Calf	18S	UNKNOWN	VIC	NFQ-MGB	13.522		8.552	0.00266435

## Sheet: Panel C
																Averages of Technical Replicates	Average of Biological Replicates
															Biological Replicates
Well	Sample Name	Target Name	Task	Reporter	Quencher	CT		ΔCт	RQ	AVE RQ	SE RQ	Normalized Ave RQ	Norm SE RQ								Adductor		Calf
A1	ECtrl Control Adductor	18S	UNKNOWN	FAM	NFQ-MGB	13.394				0.000490002	5.11446e-05	1	0.104376		1	0.000510966	Actual	0.000490002			Control	Ligated	Control	Ligated
A1	ECtrl Control Adductor	PECAM1	UNKNOWN	VIC	NFQ-MGB	24.135		10.741	0.000584301						2	0.000888734	Normalized	1		ECtrl	1	1.0347	1	1.17319
A2	ECtrl Control Adductor	18S	UNKNOWN	FAM	NFQ-MGB	13.15									3	0.000345129	Actual SEM	7.32919e-05		EfCtrl	0.878934	1.31497	1.08295	1.36501
A2	ECtrl Control Adductor	PECAM1	UNKNOWN	VIC	NFQ-MGB	24.308		11.158	0.00043763						4	0.000326258	Normalized SEM	0.149575		E3KO	1.14487	1.60344	1.76759	3.71647
B1	ECtrl Control Adductor	18S	UNKNOWN	FAM	NFQ-MGB	14.316									5	0.00043207		Ttest
B1	ECtrl Control Adductor	PECAM1	UNKNOWN	VIC	NFQ-MGB	24.342		10.026	0.000959121						6	0.000545939	ECtrl. vs. EfCtrl	0.430847			SEM	SEM	SEM	SEM
B2	ECtrl Control Adductor	18S	UNKNOWN	FAM	NFQ-MGB	14.163									7	0.000380918	ECtrl. vs. E3KO	0.438186		ECtrl	0.149575	0.0473821	0.0957057	0.0944694
B2	ECtrl Control Adductor	PECAM1	UNKNOWN	VIC	NFQ-MGB	24.418		10.255	0.000818347								EfCtrl. vs. E3KO	0.0287073		EfCtrl	0.0561775	0.0731677	0.149698	0.122704
C1	ECtrl Control Adductor	18S	UNKNOWN	FAM	NFQ-MGB	12.81														E3KO	0.101298	0.183635	0.247382	0.733018
C1	ECtrl Control Adductor	PECAM1	UNKNOWN	VIC	NFQ-MGB	24.387		11.577	0.000327323
C2	ECtrl Control Adductor	18S	UNKNOWN	FAM	NFQ-MGB	13.081
C2	ECtrl Control Adductor	PECAM1	UNKNOWN	VIC	NFQ-MGB	24.509		11.428	0.000362935
D1	ECtrl Control Adductor	18S	UNKNOWN	FAM	NFQ-MGB	13.371
D1	ECtrl Control Adductor	PECAM1	UNKNOWN	VIC	NFQ-MGB	24.798		11.427	0.000363187
D2	ECtrl Control Adductor	18S	UNKNOWN	FAM	NFQ-MGB	13.2
D2	ECtrl Control Adductor	PECAM1	UNKNOWN	VIC	NFQ-MGB	24.955		11.755	0.000289329
E1	ECtrl Control Adductor	18S	UNKNOWN	FAM	NFQ-MGB	13.778
E1	ECtrl Control Adductor	PECAM1	UNKNOWN	VIC	NFQ-MGB	24.995		11.217	0.000420094
E2	ECtrl Control Adductor	18S	UNKNOWN	FAM	NFQ-MGB	13.924
E2	ECtrl Control Adductor	PECAM1	UNKNOWN	VIC	NFQ-MGB	25.061		11.137	0.000444047
F1	ECtrl Control Adductor	18S	UNKNOWN	FAM	NFQ-MGB	13.402
F1	ECtrl Control Adductor	PECAM1	UNKNOWN	VIC	NFQ-MGB	24.25		10.848	0.000542534
F2	ECtrl Control Adductor	PECAM1	UNKNOWN	FAM	NFQ-MGB	24.201
F2	ECtrl Control Adductor	18S	UNKNOWN	VIC	NFQ-MGB	13.371		10.83	0.000549345
G1	ECtrl Control Adductor	PECAM1	UNKNOWN	FAM	NFQ-MGB	24.876
G1	ECtrl Control Adductor	18S	UNKNOWN	VIC	NFQ-MGB	13.577		11.299	0.000396883
G2	ECtrl Control Adductor	PECAM1	UNKNOWN	FAM	NFQ-MGB	24.832										Average of Technical Replicates	Average of Biological Replicates
G2	ECtrl Control Adductor	18S	UNKNOWN	VIC	NFQ-MGB	13.412		11.42	0.000364953						Biological Replicates
A9	EfCtrl Control Adductor	18S	UNKNOWN	FAM	NFQ-MGB	13.195				0.00043068	1.92601e-05	0.878934	0.0393062		1	0.000414383	Actual	0.00043068
A9	EfCtrl Control Adductor	PECAM1	UNKNOWN	VIC	NFQ-MGB	24.459		11.264	0.000406629						2	0.000397447	Normalized	0.878934
A10	EfCtrl Control Adductor	18S	UNKNOWN	FAM	NFQ-MGB	13.202									3	0.000345261	Actual SEM	2.41945e-05
A10	EfCtrl Control Adductor	PECAM1	UNKNOWN	VIC	NFQ-MGB	24.412		11.21	0.000422137						4	0.000396797	Normalized SEM	0.0561775
B9	EfCtrl Control Adductor	18S	UNKNOWN	FAM	NFQ-MGB	13.122									5	0.000417221
B9	EfCtrl Control Adductor	PECAM1	UNKNOWN	VIC	NFQ-MGB	24.475		11.353	0.000382302						6	0.000571859
B10	EfCtrl Control Adductor	18S	UNKNOWN	FAM	NFQ-MGB	13.196									7	0.000482926
B10	EfCtrl Control Adductor	PECAM1	UNKNOWN	VIC	NFQ-MGB	24.439		11.243	0.000412591						8	0.000419543
C9	EfCtrl Control Adductor	PECAM1	UNKNOWN	FAM	NFQ-MGB	24.664
C9	EfCtrl Control Adductor	18S	UNKNOWN	VIC	NFQ-MGB	13.11		11.554	0.000332583
C10	EfCtrl Control Adductor	18S	UNKNOWN	FAM	NFQ-MGB	13.16
C10	EfCtrl Control Adductor	PECAM1	UNKNOWN	VIC	NFQ-MGB	24.608		11.448	0.000357939
D9	EfCtrl Control Adductor	18S	UNKNOWN	FAM	NFQ-MGB	13.253
D9	EfCtrl Control Adductor	PECAM1	UNKNOWN	VIC	NFQ-MGB	24.475		11.222	0.000418641
D10	EfCtrl Control Adductor	18S	UNKNOWN	FAM	NFQ-MGB	13.166
D10	EfCtrl Control Adductor	PECAM1	UNKNOWN	VIC	NFQ-MGB	24.547		11.381	0.000374954
E9	EfCtrl Control Adductor	18S	UNKNOWN	FAM	NFQ-MGB	13.352
E9	EfCtrl Control Adductor	PECAM1	UNKNOWN	VIC	NFQ-MGB	24.596		11.244	0.000412305
E10	EfCtrl Control Adductor	18S	UNKNOWN	FAM	NFQ-MGB	13.334
E10	EfCtrl Control Adductor	PECAM1	UNKNOWN	VIC	NFQ-MGB	24.544		11.21	0.000422137
F9	EfCtrl Control Adductor	PECAM1	UNKNOWN	FAM	NFQ-MGB	24.282
F9	EfCtrl Control Adductor	18S	UNKNOWN	VIC	NFQ-MGB	13.229		11.053	0.000470669
F10	EfCtrl Control Adductor	PECAM1	UNKNOWN	FAM	NFQ-MGB	24.236
F10	EfCtrl Control Adductor	18S	UNKNOWN	VIC	NFQ-MGB	13.699		10.537	0.00067305
G9	EfCtrl Control Adductor	PECAM1	UNKNOWN	FAM	NFQ-MGB	24.196
G9	EfCtrl Control Adductor	18S	UNKNOWN	VIC	NFQ-MGB	13.164		11.032	0.00047757
G10	EfCtrl Control Adductor	PECAM1	UNKNOWN	FAM	NFQ-MGB	24.212
G10	EfCtrl Control Adductor	18S	UNKNOWN	VIC	NFQ-MGB	13.212		11	0.000488281
H9	EfCtrl Control Adductor	PECAM1	UNKNOWN	FAM	NFQ-MGB	24.54
H9	EfCtrl Control Adductor	18S	UNKNOWN	VIC	NFQ-MGB	13.241		11.299	0.000396882
H10	EfCtrl Control Adductor	PECAM1	UNKNOWN	FAM	NFQ-MGB	24.501										Average of Technical Replicates	Average of Biological Replicates
H10	EfCtrl Control Adductor	18S	UNKNOWN	VIC	NFQ-MGB	13.358		11.143	0.000442204						Biological Replicates
A17	E3KO Control Adductor	18S	UNKNOWN	FAM	NFQ-MGB	13.159				0.000560987	4.06446e-05	1.14487	0.0829479		1	0.000417776	Actual	0.000560987
A17	E3KO Control Adductor	PECAM1	UNKNOWN	VIC	NFQ-MGB	24.391		11.232	0.000415749						2	0.000496876	Normalized	1.14487
A18	E3KO Control Adductor	18S	UNKNOWN	FAM	NFQ-MGB	13.191									3	0.000639373	Actual SEM	4.9636e-05
A18	E3KO Control Adductor	PECAM1	UNKNOWN	VIC	NFQ-MGB	24.409		11.218	0.000419803						4	0.000757975	Normalized SEM	0.101298
B17	E3KO Control Adductor	18S	UNKNOWN	FAM	NFQ-MGB	13.172									5	0.000449693
B17	E3KO Control Adductor	PECAM1	UNKNOWN	VIC	NFQ-MGB	23.968		10.796	0.000562445						6	0.000684067
B18	E3KO Control Adductor	18S	UNKNOWN	FAM	NFQ-MGB	12.843									7	0.000481152
B18	E3KO Control Adductor	PECAM1	UNKNOWN	VIC	NFQ-MGB	24.022		11.179	0.000431306
C17	E3KO Control Adductor	18S	UNKNOWN	FAM	NFQ-MGB	13.654
C17	E3KO Control Adductor	PECAM1	UNKNOWN	VIC	NFQ-MGB	23.939		10.285	0.000801506
C18	E3KO Control Adductor	18S	UNKNOWN	FAM	NFQ-MGB	13.054
C18	E3KO Control Adductor	PECAM1	UNKNOWN	VIC	NFQ-MGB	24.087		11.033	0.000477239
D17	E3KO Control Adductor	18S	UNKNOWN	FAM	NFQ-MGB	13.174
D17	E3KO Control Adductor	PECAM1	UNKNOWN	VIC	NFQ-MGB	23.746		10.572	0.000656917
D18	E3KO Control Adductor	18S	UNKNOWN	FAM	NFQ-MGB	13.309
D18	E3KO Control Adductor	PECAM1	UNKNOWN	VIC	NFQ-MGB	23.494		10.185	0.000859033
E17	E3KO Control Adductor	18S	UNKNOWN	FAM	NFQ-MGB	13.279
E17	E3KO Control Adductor	PECAM1	UNKNOWN	VIC	NFQ-MGB	24.619		11.34	0.000385763
E18	E3KO Control Adductor	18S	UNKNOWN	FAM	NFQ-MGB	13.43
E18	E3KO Control Adductor	PECAM1	UNKNOWN	VIC	NFQ-MGB	24.357		10.927	0.000513624
F17	E3KO Control Adductor	PECAM1	UNKNOWN	FAM	NFQ-MGB	23.91
F17	E3KO Control Adductor	18S	UNKNOWN	VIC	NFQ-MGB	13.431		10.479	0.000700659
F18	E3KO Control Adductor	PECAM1	UNKNOWN	FAM	NFQ-MGB	23.901
F18	E3KO Control Adductor	18S	UNKNOWN	VIC	NFQ-MGB	13.352		10.549	0.000667475
G17	E3KO Control Adductor	PECAM1	UNKNOWN	FAM	NFQ-MGB	24.46
G17	E3KO Control Adductor	18S	UNKNOWN	VIC	NFQ-MGB	13.31		11.15	0.000440064
G18	E3KO Control Adductor	PECAM1	UNKNOWN	FAM	NFQ-MGB	24.556										Average of Technical Replicates	Average of Biological Replicates
G18	E3KO Control Adductor	18S	UNKNOWN	VIC	NFQ-MGB	13.653		10.903	0.00052224						Biological Replicates
A3	ECtrl Ligated Adductor	18S	UNKNOWN	FAM	NFQ-MGB	13.27				0.000507007	1.73081e-05	1.0347	0.0353225		1	0.000521376	Actual	0.000507007
A3	ECtrl Ligated Adductor	PECAM1	UNKNOWN	VIC	NFQ-MGB	24.134		10.864	0.00053655						2	0.000489832	Normalized	1.0347
A4	ECtrl Ligated Adductor	18S	UNKNOWN	FAM	NFQ-MGB	13.177									3	0.000535744	Actual SEM	2.32173e-05
A4	ECtrl Ligated Adductor	PECAM1	UNKNOWN	VIC	NFQ-MGB	24.125		10.948	0.000506202						4	0.000433191	Normalized SEM	0.0473821
B3	ECtrl Ligated Adductor	18S	UNKNOWN	FAM	NFQ-MGB	13.025									5	0.000601773		Ttest
B3	ECtrl Ligated Adductor	PECAM1	UNKNOWN	VIC	NFQ-MGB	23.849		10.824	0.000551634						6	0.000537346	ECtrl. vs. EfCtrl	0.00828292
B4	ECtrl Ligated Adductor	18S	UNKNOWN	FAM	NFQ-MGB	12.63									7	0.000429788	ECtrl. vs. E3KO	0.0110901
B4	ECtrl Ligated Adductor	PECAM1	UNKNOWN	VIC	NFQ-MGB	23.82		11.19	0.00042803								EfCtrl. vs. E3KO	0.148979
C3	ECtrl Ligated Adductor	18S	UNKNOWN	FAM	NFQ-MGB	13.168
C3	ECtrl Ligated Adductor	PECAM1	UNKNOWN	VIC	NFQ-MGB	24.084		10.916	0.000517555
C4	ECtrl Ligated Adductor	18S	UNKNOWN	FAM	NFQ-MGB	13.303
C4	ECtrl Ligated Adductor	PECAM1	UNKNOWN	VIC	NFQ-MGB	24.121		10.818	0.000553933
D3	ECtrl Ligated Adductor	18S	UNKNOWN	FAM	NFQ-MGB	12.936
D3	ECtrl Ligated Adductor	PECAM1	UNKNOWN	VIC	NFQ-MGB	24.138		11.202	0.000424484
D4	ECtrl Ligated Adductor	18S	UNKNOWN	FAM	NFQ-MGB	13.024
D4	ECtrl Ligated Adductor	PECAM1	UNKNOWN	VIC	NFQ-MGB	24.168		11.144	0.000441898
E3	ECtrl Ligated Adductor	18S	UNKNOWN	FAM	NFQ-MGB	13.163
E3	ECtrl Ligated Adductor	PECAM1	UNKNOWN	VIC	NFQ-MGB	23.866		10.703	0.000599896
E4	ECtrl Ligated Adductor	18S	UNKNOWN	FAM	NFQ-MGB	13.218
E4	ECtrl Ligated Adductor	PECAM1	UNKNOWN	VIC	NFQ-MGB	23.912		10.694	0.00060365
F3	ECtrl Ligated Adductor	PECAM1	UNKNOWN	FAM	NFQ-MGB	23.909
F3	ECtrl Ligated Adductor	18S	UNKNOWN	VIC	NFQ-MGB	13.027		10.882	0.000529897
F4	ECtrl Ligated Adductor	PECAM1	UNKNOWN	FAM	NFQ-MGB	23.987
F4	ECtrl Ligated Adductor	18S	UNKNOWN	VIC	NFQ-MGB	13.145		10.842	0.000544795
G3	ECtrl Ligated Adductor	PECAM1	UNKNOWN	FAM	NFQ-MGB	24.337
G3	ECtrl Ligated Adductor	18S	UNKNOWN	VIC	NFQ-MGB	13.187		11.15	0.000440064
G4	ECtrl Ligated Adductor	PECAM1	UNKNOWN	FAM	NFQ-MGB	24.354										Average of Technical Replicates	Average of Biological Replicates
G4	ECtrl Ligated Adductor	18S	UNKNOWN	VIC	NFQ-MGB	13.135		11.219	0.000419512						Biological Replicates
A11	EfCtrl Ligated Adductor	18S	UNKNOWN	FAM	NFQ-MGB	13.063				0.000644336	3.15646e-05	1.31497	0.0644173		1	0.000549307	Actual	0.000644336
A11	EfCtrl Ligated Adductor	PECAM1	UNKNOWN	VIC	NFQ-MGB	23.945		10.882	0.000529897						2	0.00055456	Normalized	1.31497
A12	EfCtrl Ligated Adductor	18S	UNKNOWN	FAM	NFQ-MGB	13.182									3	0.000848078	Actual SEM	3.58523e-05
A12	EfCtrl Ligated Adductor	PECAM1	UNKNOWN	VIC	NFQ-MGB	23.962		10.78	0.000568718						4	0.000545747	Normalized SEM	0.0731677
B11	EfCtrl Ligated Adductor	18S	UNKNOWN	FAM	NFQ-MGB	13									5	0.00067028
B11	EfCtrl Ligated Adductor	PECAM1	UNKNOWN	VIC	NFQ-MGB	23.836		10.836	0.000547065						6	0.000696308
B12	EfCtrl Ligated Adductor	18S	UNKNOWN	FAM	NFQ-MGB	13.056									7	0.00065715
B12	EfCtrl Ligated Adductor	PECAM1	UNKNOWN	VIC	NFQ-MGB	23.853		10.797	0.000562055						8	0.000633256
C11	EfCtrl Ligated Adductor	18S	UNKNOWN	FAM	NFQ-MGB	13.67
C11	EfCtrl Ligated Adductor	PECAM1	UNKNOWN	VIC	NFQ-MGB	23.561		9.891	0.0010532
C12	EfCtrl Ligated Adductor	18S	UNKNOWN	FAM	NFQ-MGB	13.019
C12	EfCtrl Ligated Adductor	PECAM1	UNKNOWN	VIC	NFQ-MGB	23.622		10.603	0.000642953
D11	EfCtrl Ligated Adductor	18S	UNKNOWN	FAM	NFQ-MGB	13.169
D11	EfCtrl Ligated Adductor	PECAM1	UNKNOWN	VIC	NFQ-MGB	24.016		10.847	0.000542909
D12	EfCtrl Ligated Adductor	18S	UNKNOWN	FAM	NFQ-MGB	13.256
D12	EfCtrl Ligated Adductor	PECAM1	UNKNOWN	VIC	NFQ-MGB	24.088		10.832	0.000548584
E11	EfCtrl Ligated Adductor	18S	UNKNOWN	FAM	NFQ-MGB	13.331
E11	EfCtrl Ligated Adductor	PECAM1	UNKNOWN	VIC	NFQ-MGB	23.862		10.531	0.000675855
E12	EfCtrl Ligated Adductor	18S	UNKNOWN	FAM	NFQ-MGB	13.328
E12	EfCtrl Ligated Adductor	PECAM1	UNKNOWN	VIC	NFQ-MGB	23.883		10.555	0.000664704
F11	EfCtrl Ligated Adductor	PECAM1	UNKNOWN	FAM	NFQ-MGB	23.788
F11	EfCtrl Ligated Adductor	18S	UNKNOWN	VIC	NFQ-MGB	13.306		10.482	0.000699203
F12	EfCtrl Ligated Adductor	PECAM1	UNKNOWN	FAM	NFQ-MGB	23.917
F12	EfCtrl Ligated Adductor	18S	UNKNOWN	VIC	NFQ-MGB	13.423		10.494	0.000693412
G11	EfCtrl Ligated Adductor	PECAM1	UNKNOWN	FAM	NFQ-MGB	23.911
G11	EfCtrl Ligated Adductor	18S	UNKNOWN	VIC	NFQ-MGB	13.334		10.577	0.000654645
G12	EfCtrl Ligated Adductor	PECAM1	UNKNOWN	FAM	NFQ-MGB	23.961
G12	EfCtrl Ligated Adductor	18S	UNKNOWN	VIC	NFQ-MGB	13.395		10.566	0.000659655
H11	EfCtrl Ligated Adductor	PECAM1	UNKNOWN	FAM	NFQ-MGB	24.284
H11	EfCtrl Ligated Adductor	18S	UNKNOWN	VIC	NFQ-MGB	13.488		10.796	0.000562445
H12	EfCtrl Ligated Adductor	PECAM1	UNKNOWN	FAM	NFQ-MGB	24.322										Average of Technical Replicates	Average of Biological Replicates
H12	EfCtrl Ligated Adductor	18S	UNKNOWN	VIC	NFQ-MGB	13.85		10.472	0.000704067						Biological Replicates
A19	E3KO Ligated Adductor	18S	UNKNOWN	FAM	NFQ-MGB	13.105				0.000785688	6.36795e-05	1.60344	0.129958		1	0.000674554	Actual	0.000785688
A19	E3KO Ligated Adductor	PECAM1	UNKNOWN	VIC	NFQ-MGB	23.57		10.465	0.000707491						2	0.000540762	Normalized	1.60344
A20	E3KO Ligated Adductor	18S	UNKNOWN	FAM	NFQ-MGB	12.965									3	0.000757234	Actual SEM	8.99816e-05
A20	E3KO Ligated Adductor	PECAM1	UNKNOWN	VIC	NFQ-MGB	23.571		10.606	0.000641617						4	0.000978021	Normalized SEM	0.183635
B19	E3KO Ligated Adductor	18S	UNKNOWN	FAM	NFQ-MGB	13.079									5	0.000514691
B19	E3KO Ligated Adductor	PECAM1	UNKNOWN	VIC	NFQ-MGB	23.98		10.901	0.000522965						6	0.00117414
B20	E3KO Ligated Adductor	18S	UNKNOWN	FAM	NFQ-MGB	13.208									7	0.000860407
B20	E3KO Ligated Adductor	PECAM1	UNKNOWN	VIC	NFQ-MGB	24.014		10.806	0.00055856
C19	E3KO Ligated Adductor	18S	UNKNOWN	FAM	NFQ-MGB	13.137
C19	E3KO Ligated Adductor	PECAM1	UNKNOWN	VIC	NFQ-MGB	23.513		10.376	0.000752511
C20	E3KO Ligated Adductor	18S	UNKNOWN	FAM	NFQ-MGB	13.155
C20	E3KO Ligated Adductor	PECAM1	UNKNOWN	VIC	NFQ-MGB	23.513		10.358	0.000761958
D19	E3KO Ligated Adductor	18S	UNKNOWN	FAM	NFQ-MGB	13.243
D19	E3KO Ligated Adductor	PECAM1	UNKNOWN	VIC	NFQ-MGB	23.331		10.088	0.000918776
D20	E3KO Ligated Adductor	18S	UNKNOWN	FAM	NFQ-MGB	13.46
D20	E3KO Ligated Adductor	PECAM1	UNKNOWN	VIC	NFQ-MGB	23.373		9.913	0.00103727
E19	E3KO Ligated Adductor	18S	UNKNOWN	FAM	NFQ-MGB	13.666
E19	E3KO Ligated Adductor	PECAM1	UNKNOWN	VIC	NFQ-MGB	24.43		10.764	0.00057506
E20	E3KO Ligated Adductor	18S	UNKNOWN	FAM	NFQ-MGB	13.373
E20	E3KO Ligated Adductor	PECAM1	UNKNOWN	VIC	NFQ-MGB	24.477		11.104	0.000454321
F19	E3KO Ligated Adductor	PECAM1	UNKNOWN	FAM	NFQ-MGB	23.423
F19	E3KO Ligated Adductor	18S	UNKNOWN	VIC	NFQ-MGB	13.536		9.887	0.00105613
F20	E3KO Ligated Adductor	PECAM1	UNKNOWN	FAM	NFQ-MGB	23.484
F20	E3KO Ligated Adductor	18S	UNKNOWN	VIC	NFQ-MGB	13.888		9.596	0.00129216
G19	E3KO Ligated Adductor	PECAM1	UNKNOWN	FAM	NFQ-MGB	23.718
G19	E3KO Ligated Adductor	18S	UNKNOWN	VIC	NFQ-MGB	13.664		10.054	0.000940685
G20	E3KO Ligated Adductor	PECAM1	UNKNOWN	FAM	NFQ-MGB	23.73										Average of Technical Replicates	Average of Biological Replicates
G20	E3KO Ligated Adductor	18S	UNKNOWN	VIC	NFQ-MGB	13.406		10.324	0.000780129						Biological Replicates
A5	ECtrl Control Calf	18S	UNKNOWN	FAM	NFQ-MGB	13.123				0.000446451	2.91977e-05	1	0.0653996		1	0.000378076	Actual	0.000446451
A5	ECtrl Control Calf	PECAM1	UNKNOWN	VIC	NFQ-MGB	24.456		11.333	0.000387639						2	0.000383253	Normalized	1
A6	ECtrl Control Calf	18S	UNKNOWN	FAM	NFQ-MGB	13.067									3	0.000462779	Actual SEM	4.27279e-05
A6	ECtrl Control Calf	PECAM1	UNKNOWN	VIC	NFQ-MGB	24.473		11.406	0.000368512						4	0.00034385	Normalized SEM	0.0957057
B5	ECtrl Control Calf	18S	UNKNOWN	FAM	NFQ-MGB	12.614									5	0.000369877		Ttest
B5	ECtrl Control Calf	PECAM1	UNKNOWN	VIC	NFQ-MGB	23.948		11.334	0.00038737						6	0.000656949	ECtrl. vs. EfCtrl	0.678403
B6	ECtrl Control Calf	18S	UNKNOWN	FAM	NFQ-MGB	12.597									7	0.000530372	ECtrl. vs. E3KO	0.0134797
B6	ECtrl Control Calf	PECAM1	UNKNOWN	VIC	NFQ-MGB	23.962		11.365	0.000379135								EfCtrl. vs. E3KO	0.0337873
C5	ECtrl Control Calf	PECAM1	UNKNOWN	FAM	NFQ-MGB	23.979
C5	ECtrl Control Calf	18S	UNKNOWN	VIC	NFQ-MGB	12.859		11.12	0.00044931
C6	ECtrl Control Calf	PECAM1	UNKNOWN	FAM	NFQ-MGB	23.986
C6	ECtrl Control Calf	18S	UNKNOWN	VIC	NFQ-MGB	12.95		11.036	0.000476248
D5	ECtrl Control Calf	18S	UNKNOWN	FAM	NFQ-MGB	12.458
D5	ECtrl Control Calf	PECAM1	UNKNOWN	VIC	NFQ-MGB	23.924		11.466	0.000353501
D6	ECtrl Control Calf	18S	UNKNOWN	FAM	NFQ-MGB	12.456
D6	ECtrl Control Calf	PECAM1	UNKNOWN	VIC	NFQ-MGB	24.003		11.547	0.0003342
E5	ECtrl Control Calf	18S	UNKNOWN	FAM	NFQ-MGB	13.05
E5	ECtrl Control Calf	PECAM1	UNKNOWN	VIC	NFQ-MGB	24.42		11.37	0.000377824
E6	ECtrl Control Calf	18S	UNKNOWN	FAM	NFQ-MGB	12.994
E6	ECtrl Control Calf	PECAM1	UNKNOWN	VIC	NFQ-MGB	24.426		11.432	0.00036193
F5	ECtrl Control Calf	PECAM1	UNKNOWN	FAM	NFQ-MGB	24.028
F5	ECtrl Control Calf	18S	UNKNOWN	VIC	NFQ-MGB	13.496		10.532	0.000675386
F6	ECtrl Control Calf	PECAM1	UNKNOWN	FAM	NFQ-MGB	24.141
F6	ECtrl Control Calf	18S	UNKNOWN	VIC	NFQ-MGB	13.528		10.613	0.000638511
G5	ECtrl Control Calf	PECAM1	UNKNOWN	FAM	NFQ-MGB	24.106
G5	ECtrl Control Calf	18S	UNKNOWN	VIC	NFQ-MGB	13.196		10.91	0.000519712
G6	ECtrl Control Calf	PECAM1	UNKNOWN	FAM	NFQ-MGB	24.144										Average of Technical Replicates	Average of Biological Replicates
G6	ECtrl Control Calf	18S	UNKNOWN	VIC	NFQ-MGB	13.292		10.852	0.000541032						Biological Replicates
A13	EfCtrl Control Calf	18S	UNKNOWN	FAM	NFQ-MGB	13.068				0.000483485	5.10783e-05	1.08295	0.11441		1	0.000355616	Actual	0.000483485
A13	EfCtrl Control Calf	PECAM1	UNKNOWN	VIC	NFQ-MGB	24.508		11.44	0.000359929						2	0.000450927	Normalized	1.08295
A14	EfCtrl Control Calf	18S	UNKNOWN	FAM	NFQ-MGB	13.103									3	0.000466371	Actual SEM	7.23768e-05
A14	EfCtrl Control Calf	PECAM1	UNKNOWN	VIC	NFQ-MGB	24.578		11.475	0.000351302						4	0.00037176	Normalized SEM	0.149698
B13	EfCtrl Control Calf	18S	UNKNOWN	FAM	NFQ-MGB	13.264									5	0.000310011
B13	EfCtrl Control Calf	PECAM1	UNKNOWN	VIC	NFQ-MGB	24.356		11.092	0.000458116						6	0.000387287
B14	EfCtrl Control Calf	18S	UNKNOWN	FAM	NFQ-MGB	13.279									7	0.000579086
B14	EfCtrl Control Calf	PECAM1	UNKNOWN	VIC	NFQ-MGB	24.417		11.138	0.000443739						8	0.000946819
C13	EfCtrl Control Calf	18S	UNKNOWN	FAM	NFQ-MGB	13.3
C13	EfCtrl Control Calf	PECAM1	UNKNOWN	VIC	NFQ-MGB	24.32		11.02	0.000481559
C14	EfCtrl Control Calf	18S	UNKNOWN	FAM	NFQ-MGB	13.269
C14	EfCtrl Control Calf	PECAM1	UNKNOWN	VIC	NFQ-MGB	24.383		11.114	0.000451183
D13	EfCtrl Control Calf	18S	UNKNOWN	FAM	NFQ-MGB	13.207
D13	EfCtrl Control Calf	PECAM1	UNKNOWN	VIC	NFQ-MGB	24.622		11.415	0.00036622
D14	EfCtrl Control Calf	18S	UNKNOWN	FAM	NFQ-MGB	13.125
D14	EfCtrl Control Calf	PECAM1	UNKNOWN	VIC	NFQ-MGB	24.497		11.372	0.0003773
E13	EfCtrl Control Calf	18S	UNKNOWN	FAM	NFQ-MGB	13.049
E13	EfCtrl Control Calf	PECAM1	UNKNOWN	VIC	NFQ-MGB	24.687		11.638	0.000313771
E14	EfCtrl Control Calf	18S	UNKNOWN	FAM	NFQ-MGB	12.858
E14	EfCtrl Control Calf	PECAM1	UNKNOWN	VIC	NFQ-MGB	24.531		11.673	0.00030625
F13	EfCtrl Control Calf	PECAM1	UNKNOWN	FAM	NFQ-MGB	24.5
F13	EfCtrl Control Calf	18S	UNKNOWN	VIC	NFQ-MGB	13.142		11.358	0.000380979
F14	EfCtrl Control Calf	PECAM1	UNKNOWN	FAM	NFQ-MGB	24.532
F14	EfCtrl Control Calf	18S	UNKNOWN	VIC	NFQ-MGB	13.221		11.311	0.000393595
G13	EfCtrl Control Calf	PECAM1	UNKNOWN	FAM	NFQ-MGB	24.273
G13	EfCtrl Control Calf	18S	UNKNOWN	VIC	NFQ-MGB	13.414		10.859	0.000538412
G14	EfCtrl Control Calf	PECAM1	UNKNOWN	FAM	NFQ-MGB	24.283
G14	EfCtrl Control Calf	18S	UNKNOWN	VIC	NFQ-MGB	13.627		10.656	0.000619761
H13	EfCtrl Control Calf	18S	UNKNOWN	FAM	NFQ-MGB	14.594
H13	EfCtrl Control Calf	PECAM1	UNKNOWN	VIC	NFQ-MGB	24.449		9.855	0.00107982
H14	EfCtrl Control Calf	18S	UNKNOWN	FAM	NFQ-MGB	14.231										Average of Technical Replicates	Average of Biological Replicates
H14	EfCtrl Control Calf	PECAM1	UNKNOWN	VIC	NFQ-MGB	24.494		10.263	0.000813822						Biological Replicates
A21	E3KO Control Calf	18S	UNKNOWN	FAM	NFQ-MGB	14.337				0.000789142	7.79566e-05	1.76759	0.174614		1	0.00112558	Actual	0.000789142
A21	E3KO Control Calf	PECAM1	UNKNOWN	VIC	NFQ-MGB	24.024		9.687	0.00121317						2	0.000538634	Normalized	1.76759
A22	E3KO Control Calf	18S	UNKNOWN	FAM	NFQ-MGB	14.153									3	0.000580533	Actual SEM	0.000110444
A22	E3KO Control Calf	PECAM1	UNKNOWN	VIC	NFQ-MGB	24.065		9.912	0.00103798						4	0.00120665	Normalized SEM	0.247382
B21	E3KO Control Calf	18S	UNKNOWN	FAM	NFQ-MGB	13.242									5	0.000474789
B21	E3KO Control Calf	PECAM1	UNKNOWN	VIC	NFQ-MGB	24.117		10.875	0.000532474						6	0.000897732
B22	E3KO Control Calf	18S	UNKNOWN	FAM	NFQ-MGB	13.259									7	0.000700085
B22	E3KO Control Calf	PECAM1	UNKNOWN	VIC	NFQ-MGB	24.101		10.842	0.000544795
C21	E3KO Control Calf	18S	UNKNOWN	FAM	NFQ-MGB	13.622
C21	E3KO Control Calf	PECAM1	UNKNOWN	VIC	NFQ-MGB	24.064		10.442	0.000718861
C22	E3KO Control Calf	18S	UNKNOWN	FAM	NFQ-MGB	12.966
C22	E3KO Control Calf	PECAM1	UNKNOWN	VIC	NFQ-MGB	24.109		11.143	0.000442204
D21	E3KO Control Calf	18S	UNKNOWN	FAM	NFQ-MGB	14.152
D21	E3KO Control Calf	PECAM1	UNKNOWN	VIC	NFQ-MGB	23.769		9.617	0.00127349
D22	E3KO Control Calf	18S	UNKNOWN	FAM	NFQ-MGB	14.095
D22	E3KO Control Calf	PECAM1	UNKNOWN	VIC	NFQ-MGB	23.872		9.777	0.0011398
E21	E3KO Control Calf	18S	UNKNOWN	FAM	NFQ-MGB	13.326
E21	E3KO Control Calf	PECAM1	UNKNOWN	VIC	NFQ-MGB	24.352		11.026	0.000479561
E22	E3KO Control Calf	18S	UNKNOWN	FAM	NFQ-MGB	13.345
E22	E3KO Control Calf	PECAM1	UNKNOWN	VIC	NFQ-MGB	24.4		11.055	0.000470017
F21	E3KO Control Calf	PECAM1	UNKNOWN	FAM	NFQ-MGB	23.981
F21	E3KO Control Calf	18S	UNKNOWN	VIC	NFQ-MGB	13.874		10.107	0.000906754
F22	E3KO Control Calf	PECAM1	UNKNOWN	FAM	NFQ-MGB	24.02
F22	E3KO Control Calf	18S	UNKNOWN	VIC	NFQ-MGB	13.884		10.136	0.000888709
G21	E3KO Control Calf	PECAM1	UNKNOWN	FAM	NFQ-MGB	24.186
G21	E3KO Control Calf	18S	UNKNOWN	VIC	NFQ-MGB	13.492		10.694	0.00060365
G22	E3KO Control Calf	PECAM1	UNKNOWN	FAM	NFQ-MGB	24.19										Average of Technical Replicates	Average of Biological Replicates
G22	E3KO Control Calf	18S	UNKNOWN	VIC	NFQ-MGB	13.896		10.294	0.000796521						Biological Replicates
A7	ECtrl Ligated Calf	18S	UNKNOWN	FAM	NFQ-MGB	13.075				0.000523772	2.88583e-05	1.17319	0.0646395		1	0.000430729	Actual	0.000523772
A7	ECtrl Ligated Calf	PECAM1	UNKNOWN	VIC	NFQ-MGB	24.242		11.167	0.000434908						2	0.000631725	Normalized	1.17319
A8	ECtrl Ligated Calf	18S	UNKNOWN	FAM	NFQ-MGB	13.081									3	0.000481801	Actual SEM	4.2176e-05
A8	ECtrl Ligated Calf	PECAM1	UNKNOWN	VIC	NFQ-MGB	24.276		11.195	0.00042655						4	0.000381671	Normalized SEM	0.0944694
B7	ECtrl Ligated Calf	18S	UNKNOWN	FAM	NFQ-MGB	13.006									5	0.000479006		Ttest
B7	ECtrl Ligated Calf	PECAM1	UNKNOWN	VIC	NFQ-MGB	23.65		10.644	0.000624938						6	0.000692212	ECtrl. vs. EfCtrl	0.247501
B8	ECtrl Ligated Calf	18S	UNKNOWN	FAM	NFQ-MGB	13.048									7	0.000569261	ECtrl. vs. E3KO	0.00488421
B8	ECtrl Ligated Calf	PECAM1	UNKNOWN	VIC	NFQ-MGB	23.661		10.613	0.000638512								EfCtrl. vs. E3KO	0.00487414
C7	ECtrl Ligated Calf	PECAM1	UNKNOWN	FAM	NFQ-MGB	23.579
C7	ECtrl Ligated Calf	18S	UNKNOWN	VIC	NFQ-MGB	12.618		10.961	0.000501661
C8	ECtrl Ligated Calf	PECAM1	UNKNOWN	FAM	NFQ-MGB	23.649
C8	ECtrl Ligated Calf	18S	UNKNOWN	VIC	NFQ-MGB	12.569		11.08	0.000461942
D7	ECtrl Ligated Calf	18S	UNKNOWN	FAM	NFQ-MGB	12.493
D7	ECtrl Ligated Calf	PECAM1	UNKNOWN	VIC	NFQ-MGB	23.83		11.337	0.000386565
D8	ECtrl Ligated Calf	18S	UNKNOWN	FAM	NFQ-MGB	12.484
D8	ECtrl Ligated Calf	PECAM1	UNKNOWN	VIC	NFQ-MGB	23.858		11.374	0.000376777
E7	ECtrl Ligated Calf	18S	UNKNOWN	FAM	NFQ-MGB	13.079
E7	ECtrl Ligated Calf	PECAM1	UNKNOWN	VIC	NFQ-MGB	24.046		10.967	0.000499579
E8	ECtrl Ligated Calf	18S	UNKNOWN	FAM	NFQ-MGB	12.963
E8	ECtrl Ligated Calf	PECAM1	UNKNOWN	VIC	NFQ-MGB	24.054		11.091	0.000458433
F7	ECtrl Ligated Calf	PECAM1	UNKNOWN	FAM	NFQ-MGB	23.578
F7	ECtrl Ligated Calf	18S	UNKNOWN	VIC	NFQ-MGB	13.08		10.498	0.000691492
F8	ECtrl Ligated Calf	PECAM1	UNKNOWN	FAM	NFQ-MGB	23.567
F8	ECtrl Ligated Calf	18S	UNKNOWN	VIC	NFQ-MGB	13.072		10.495	0.000692931
G7	ECtrl Ligated Calf	PECAM1	UNKNOWN	FAM	NFQ-MGB	23.967
G7	ECtrl Ligated Calf	18S	UNKNOWN	VIC	NFQ-MGB	13.155		10.812	0.000556242
G8	ECtrl Ligated Calf	PECAM1	UNKNOWN	FAM	NFQ-MGB	23.922										Average of Technical Replicates	Average of Biological Replicates
G8	ECtrl Ligated Calf	18S	UNKNOWN	VIC	NFQ-MGB	13.176		10.746	0.000582279						Biological Replicates
A15	EfCtrl Ligated Calf	18S	UNKNOWN	FAM	NFQ-MGB	13.122				0.000609411	3.84657e-05	1.36501	0.0861589		1	0.000532912	Actual	0.000609411
A15	EfCtrl Ligated Calf	PECAM1	UNKNOWN	VIC	NFQ-MGB	23.973		10.851	0.000541407						2	0.000701763	Normalized	1.36501
A16	EfCtrl Ligated Calf	18S	UNKNOWN	FAM	NFQ-MGB	13.073									3	0.00041992	Actual SEM	5.47812e-05
A16	EfCtrl Ligated Calf	PECAM1	UNKNOWN	VIC	NFQ-MGB	23.97		10.897	0.000524416						4	0.000445195	Normalized SEM	0.122704
B15	EfCtrl Ligated Calf	18S	UNKNOWN	FAM	NFQ-MGB	14.004									5	0.000506137
B15	EfCtrl Ligated Calf	PECAM1	UNKNOWN	VIC	NFQ-MGB	24.509		10.505	0.000688144						6	0.000841826
B16	EfCtrl Ligated Calf	18S	UNKNOWN	FAM	NFQ-MGB	14.043									7	0.000760337
B16	EfCtrl Ligated Calf	PECAM1	UNKNOWN	VIC	NFQ-MGB	24.492		10.449	0.000715381						8	0.000667197
C15	EfCtrl Ligated Calf	18S	UNKNOWN	FAM	NFQ-MGB	13.048
C15	EfCtrl Ligated Calf	PECAM1	UNKNOWN	VIC	NFQ-MGB	24.3		11.252	0.000410025
C16	EfCtrl Ligated Calf	18S	UNKNOWN	FAM	NFQ-MGB	13.134
C16	EfCtrl Ligated Calf	PECAM1	UNKNOWN	VIC	NFQ-MGB	24.318		11.184	0.000429814
D15	EfCtrl Ligated Calf	18S	UNKNOWN	FAM	NFQ-MGB	12.993
D15	EfCtrl Ligated Calf	PECAM1	UNKNOWN	VIC	NFQ-MGB	24.068		11.075	0.000463546
D16	EfCtrl Ligated Calf	18S	UNKNOWN	FAM	NFQ-MGB	12.909
D16	EfCtrl Ligated Calf	PECAM1	UNKNOWN	VIC	NFQ-MGB	24.103		11.194	0.000426845
E15	EfCtrl Ligated Calf	18S	UNKNOWN	FAM	NFQ-MGB	13.28
E15	EfCtrl Ligated Calf	PECAM1	UNKNOWN	VIC	NFQ-MGB	24.127		10.847	0.000542909
E16	EfCtrl Ligated Calf	18S	UNKNOWN	FAM	NFQ-MGB	13.15
E16	EfCtrl Ligated Calf	PECAM1	UNKNOWN	VIC	NFQ-MGB	24.207		11.057	0.000469365
F15	EfCtrl Ligated Calf	PECAM1	UNKNOWN	FAM	NFQ-MGB	24.066
F15	EfCtrl Ligated Calf	18S	UNKNOWN	VIC	NFQ-MGB	13.912		10.154	0.00087769
F16	EfCtrl Ligated Calf	PECAM1	UNKNOWN	FAM	NFQ-MGB	24.11
F16	EfCtrl Ligated Calf	18S	UNKNOWN	VIC	NFQ-MGB	13.833		10.277	0.000805962
G15	EfCtrl Ligated Calf	PECAM1	UNKNOWN	FAM	NFQ-MGB	23.959
G15	EfCtrl Ligated Calf	18S	UNKNOWN	VIC	NFQ-MGB	13.444		10.515	0.000683392
G16	EfCtrl Ligated Calf	PECAM1	UNKNOWN	FAM	NFQ-MGB	23.996
G16	EfCtrl Ligated Calf	18S	UNKNOWN	VIC	NFQ-MGB	13.774		10.222	0.000837281
H15	EfCtrl Ligated Calf	18S	UNKNOWN	FAM	NFQ-MGB	13.356
H15	EfCtrl Ligated Calf	PECAM1	UNKNOWN	VIC	NFQ-MGB	23.94		10.584	0.000651476
H16	EfCtrl Ligated Calf	18S	UNKNOWN	FAM	NFQ-MGB	13.417										Average of Technical Replicates	Average of Biological Replicates
H16	EfCtrl Ligated Calf	PECAM1	UNKNOWN	VIC	NFQ-MGB	23.933		10.516	0.000682918						Biological Replicates
A23	E3KO Ligated Calf	18S	UNKNOWN	FAM	NFQ-MGB	13.61				0.00165922	0.000231235	3.71647	0.517941		1	0.00329766	Actual	0.00165922
A23	E3KO Ligated Calf	PECAM1	UNKNOWN	VIC	NFQ-MGB	21.975		8.365	0.00303308						2	0.000847762	Normalized	3.71647
A24	E3KO Ligated Calf	18S	UNKNOWN	FAM	NFQ-MGB	13.846									3	0.00158218	Actual SEM	0.000327256
A24	E3KO Ligated Calf	PECAM1	UNKNOWN	VIC	NFQ-MGB	21.979		8.133	0.00356224						4	0.00158128	Normalized SEM	0.733018
B23	E3KO Ligated Calf	18S	UNKNOWN	FAM	NFQ-MGB	13.406									5	0.000718799
B23	E3KO Ligated Calf	PECAM1	UNKNOWN	VIC	NFQ-MGB	23.891		10.485	0.000697751						6	0.00212711
B24	E3KO Ligated Calf	18S	UNKNOWN	FAM	NFQ-MGB	13.992									7	0.00145975
B24	E3KO Ligated Calf	PECAM1	UNKNOWN	VIC	NFQ-MGB	23.961		9.969	0.000997773
C23	E3KO Ligated Calf	18S	UNKNOWN	FAM	NFQ-MGB	13.526
C23	E3KO Ligated Calf	PECAM1	UNKNOWN	VIC	NFQ-MGB	23.088		9.562	0.00132297
C24	E3KO Ligated Calf	18S	UNKNOWN	FAM	NFQ-MGB	14.03
C24	E3KO Ligated Calf	PECAM1	UNKNOWN	VIC	NFQ-MGB	23.115		9.085	0.00184138
D23	E3KO Ligated Calf	18S	UNKNOWN	FAM	NFQ-MGB	14.184
D23	E3KO Ligated Calf	PECAM1	UNKNOWN	VIC	NFQ-MGB	23.652		9.468	0.00141204
D24	E3KO Ligated Calf	18S	UNKNOWN	FAM	NFQ-MGB	13.985
D24	E3KO Ligated Calf	PECAM1	UNKNOWN	VIC	NFQ-MGB	23.143		9.158	0.00175052
E23	E3KO Ligated Calf	18S	UNKNOWN	FAM	NFQ-MGB	13.35
E23	E3KO Ligated Calf	PECAM1	UNKNOWN	VIC	NFQ-MGB	23.971		10.621	0.00063498
E24	E3KO Ligated Calf	18S	UNKNOWN	FAM	NFQ-MGB	13.758
E24	E3KO Ligated Calf	PECAM1	UNKNOWN	VIC	NFQ-MGB	24.041		10.283	0.000802617
F23	E3KO Ligated Calf	PECAM1	UNKNOWN	FAM	NFQ-MGB	22.948
F23	E3KO Ligated Calf	18S	UNKNOWN	VIC	NFQ-MGB	13.839		9.109	0.001811
F24	E3KO Ligated Calf	PECAM1	UNKNOWN	FAM	NFQ-MGB	22.96
F24	E3KO Ligated Calf	18S	UNKNOWN	VIC	NFQ-MGB	14.283		8.677	0.00244322
G23	E3KO Ligated Calf	PECAM1	UNKNOWN	FAM	NFQ-MGB	23.307
G23	E3KO Ligated Calf	18S	UNKNOWN	VIC	NFQ-MGB	13.593		9.714	0.00119068
G24	E3KO Ligated Calf	PECAM1	UNKNOWN	FAM	NFQ-MGB	23.342
G24	E3KO Ligated Calf	18S	UNKNOWN	VIC	NFQ-MGB	14.166		9.176	0.00172882

## Sheet: Panel D
																Averages of Technical Replicates	Average of Biological Replicates
															Biological Replicates
Well	Sample Name	Target Name	Task	Reporter	Quencher	CT		ΔCт	RQ	AVE RQ	SE RQ	Normalized Ave RQ	Norm SE RQ								Adductor		Calf
A1	ECtrl Control Adductor	18S	UNKNOWN	FAM	NFQ-MGB	13.855				0.000309395	2.46097e-05	1	0.0795412		1	0.000268407	Actual	0.000309395			Control	Ligated	Control	Ligated
A1	ECtrl Control Adductor	Slc2a1 (Glut1)	UNKNOWN	VIC	NFQ-MGB	25.423		11.568	0.000329371						2	0.000350767	Normalized	1		ECtrl	1	1.20376	1	1.52422
A2	ECtrl Control Adductor	18S	UNKNOWN	FAM	NFQ-MGB	13.333									3	0.000331158	Actual SEM	3.0465e-05		EfCtrl	0.76324	1.16574	0.929603	1.52013
A2	ECtrl Control Adductor	Slc2a1 (Glut1)	UNKNOWN	VIC	NFQ-MGB	25.568		12.235	0.000207443						4	0.000261383	Normalized SEM	0.0984663		E3KO	0.959403	2.81982	1.73823	125.315
B1	ECtrl Control Adductor	18S	UNKNOWN	FAM	NFQ-MGB	14.521									5	0.000224982		Ttest
B1	ECtrl Control Adductor	Slc2a1 (Glut1)	UNKNOWN	VIC	NFQ-MGB	25.806		11.285	0.000400753						6	0.000463541	ECtrl. vs. EfCtrl	0.0462676			SEM	SEM	SEM	SEM
B2	ECtrl Control Adductor	18S	UNKNOWN	FAM	NFQ-MGB	14.196									7	0.00026553	ECtrl. vs. E3KO	0.727957		ECtrl	0.0984663	0.0924991	0.0847284	0.113269
B2	ECtrl Control Adductor	Slc2a1 (Glut1)	UNKNOWN	VIC	NFQ-MGB	25.895		11.699	0.000300781								EfCtrl. vs. E3KO	0.0252143		EfCtrl	0.0685974	0.0993146	0.0996753	0.114148
C1	ECtrl Control Adductor	18S	UNKNOWN	FAM	NFQ-MGB	13.336														E3KO	0.0574651	0.604697	0.223519	55.2088
C1	ECtrl Control Adductor	Slc2a1 (Glut1)	UNKNOWN	VIC	NFQ-MGB	24.809		11.473	0.00035179
C2	ECtrl Control Adductor	18S	UNKNOWN	FAM	NFQ-MGB	13.232
C2	ECtrl Control Adductor	Slc2a1 (Glut1)	UNKNOWN	VIC	NFQ-MGB	24.885		11.653	0.000310526
D1	ECtrl Control Adductor	Slc2a1 (Glut1)	UNKNOWN	FAM	NFQ-MGB	25.57
D1	ECtrl Control Adductor	18S	UNKNOWN	VIC	NFQ-MGB	13.72		11.85	0.000270891
D2	ECtrl Control Adductor	Slc2a1 (Glut1)	UNKNOWN	FAM	NFQ-MGB	25.576
D2	ECtrl Control Adductor	18S	UNKNOWN	VIC	NFQ-MGB	13.621		11.955	0.000251876
E1	ECtrl Control Adductor	Slc2a1 (Glut1)	UNKNOWN	FAM	NFQ-MGB	25.871
E1	ECtrl Control Adductor	18S	UNKNOWN	VIC	NFQ-MGB	13.964		11.907	0.000260397
E2	ECtrl Control Adductor	Slc2a1 (Glut1)	UNKNOWN	FAM	NFQ-MGB	25.938
E2	ECtrl Control Adductor	18S	UNKNOWN	VIC	NFQ-MGB	13.573		12.365	0.000189568
F1	ECtrl Control Adductor	Slc2a1 (Glut1)	UNKNOWN	FAM	NFQ-MGB	24.684
F1	ECtrl Control Adductor	18S	UNKNOWN	VIC	NFQ-MGB	13.864		10.82	0.000553166
F2	ECtrl Control Adductor	Slc2a1 (Glut1)	UNKNOWN	FAM	NFQ-MGB	24.622
F2	ECtrl Control Adductor	18S	UNKNOWN	VIC	NFQ-MGB	13.237		11.385	0.000373916
G1	ECtrl Control Adductor	Slc2a1 (Glut1)	UNKNOWN	FAM	NFQ-MGB	25.635
G1	ECtrl Control Adductor	18S	UNKNOWN	VIC	NFQ-MGB	13.813		11.822	0.0002762
G2	ECtrl Control Adductor	Slc2a1 (Glut1)	UNKNOWN	FAM	NFQ-MGB	25.659										Average of Technical Replicates	Average of Biological Replicates
G2	ECtrl Control Adductor	18S	UNKNOWN	VIC	NFQ-MGB	13.721		11.938	0.000254861						Biological Replicates
A9	EfCtrl Control Adductor	18S	UNKNOWN	FAM	NFQ-MGB	13.555				0.000236143	1.30706e-05	0.76324	0.0422456		1	0.000291623	Actual	0.000236143
A9	EfCtrl Control Adductor	Slc2a1 (Glut1)	UNKNOWN	VIC	NFQ-MGB	25.174		11.619	0.000317931						2	0.000198446	Normalized	0.76324
A10	EfCtrl Control Adductor	18S	UNKNOWN	FAM	NFQ-MGB	13.306									3	0.000230778	Actual SEM	1.61988e-05
A10	EfCtrl Control Adductor	Slc2a1 (Glut1)	UNKNOWN	VIC	NFQ-MGB	25.186		11.88	0.000265316						4	0.000244672	Normalized SEM	0.0685974
B9	EfCtrl Control Adductor	18S	UNKNOWN	FAM	NFQ-MGB	13.119									5	0.000189122
B9	EfCtrl Control Adductor	Slc2a1 (Glut1)	UNKNOWN	VIC	NFQ-MGB	25.486		12.367	0.000189305						6	0.000173422
B10	EfCtrl Control Adductor	18S	UNKNOWN	FAM	NFQ-MGB	13.249									7	0.000278689
B10	EfCtrl Control Adductor	Slc2a1 (Glut1)	UNKNOWN	VIC	NFQ-MGB	25.483		12.234	0.000207586						8	0.00028239
C9	EfCtrl Control Adductor	Slc2a1 (Glut1)	UNKNOWN	FAM	NFQ-MGB	25.4
C9	EfCtrl Control Adductor	18S	UNKNOWN	VIC	NFQ-MGB	13.389		12.011	0.000242286
C10	EfCtrl Control Adductor	Slc2a1 (Glut1)	UNKNOWN	FAM	NFQ-MGB	25.415
C10	EfCtrl Control Adductor	18S	UNKNOWN	VIC	NFQ-MGB	13.26		12.155	0.00021927
D9	EfCtrl Control Adductor	Slc2a1 (Glut1)	UNKNOWN	FAM	NFQ-MGB	25.509
D9	EfCtrl Control Adductor	18S	UNKNOWN	VIC	NFQ-MGB	13.317		12.192	0.000213719
D10	EfCtrl Control Adductor	Slc2a1 (Glut1)	UNKNOWN	FAM	NFQ-MGB	25.548
D10	EfCtrl Control Adductor	18S	UNKNOWN	VIC	NFQ-MGB	13.723		11.825	0.000275626
E9	EfCtrl Control Adductor	Slc2a1 (Glut1)	UNKNOWN	FAM	NFQ-MGB	25.802
E9	EfCtrl Control Adductor	18S	UNKNOWN	VIC	NFQ-MGB	13.612		12.19	0.000214015
E10	EfCtrl Control Adductor	Slc2a1 (Glut1)	UNKNOWN	FAM	NFQ-MGB	25.85
E10	EfCtrl Control Adductor	18S	UNKNOWN	VIC	NFQ-MGB	13.278		12.572	0.000164229
F9	EfCtrl Control Adductor	Slc2a1 (Glut1)	UNKNOWN	FAM	NFQ-MGB	25.941
F9	EfCtrl Control Adductor	18S	UNKNOWN	VIC	NFQ-MGB	13.574		12.367	0.000189305
F10	EfCtrl Control Adductor	Slc2a1 (Glut1)	UNKNOWN	FAM	NFQ-MGB	25.902
F10	EfCtrl Control Adductor	18S	UNKNOWN	VIC	NFQ-MGB	13.27		12.632	0.000157539
G9	EfCtrl Control Adductor	Slc2a1 (Glut1)	UNKNOWN	FAM	NFQ-MGB	25.289
G9	EfCtrl Control Adductor	18S	UNKNOWN	VIC	NFQ-MGB	13.257		12.032	0.000238785
G10	EfCtrl Control Adductor	Slc2a1 (Glut1)	UNKNOWN	FAM	NFQ-MGB	25.311
G10	EfCtrl Control Adductor	18S	UNKNOWN	VIC	NFQ-MGB	13.695		11.616	0.000318592
H9	EfCtrl Control Adductor	Slc2a1 (Glut1)	UNKNOWN	FAM	NFQ-MGB	25.33
H9	EfCtrl Control Adductor	18S	UNKNOWN	VIC	NFQ-MGB	13.329		12.001	0.000243972
H10	EfCtrl Control Adductor	Slc2a1 (Glut1)	UNKNOWN	FAM	NFQ-MGB	25.284										Average of Technical Replicates	Average of Biological Replicates
H10	EfCtrl Control Adductor	18S	UNKNOWN	VIC	NFQ-MGB	13.678		11.606	0.000320809						Biological Replicates
A17	E3KO Control Adductor	18S	UNKNOWN	FAM	NFQ-MGB	13.316				0.000296835	1.35012e-05	0.959403	0.0436373		1	0.000326841	Actual	0.000296835
A17	E3KO Control Adductor	Slc2a1 (Glut1)	UNKNOWN	VIC	NFQ-MGB	25.074		11.758	0.000288728						2	0.000324329	Normalized	0.959403
A18	E3KO Control Adductor	18S	UNKNOWN	FAM	NFQ-MGB	13.63									3	0.000266323	Actual SEM	1.77794e-05
A18	E3KO Control Adductor	Slc2a1 (Glut1)	UNKNOWN	VIC	NFQ-MGB	25.05		11.42	0.000364954						4	0.000279361	Normalized SEM	0.0574651
B17	E3KO Control Adductor	18S	UNKNOWN	FAM	NFQ-MGB	13.318									5	0.000225188
B17	E3KO Control Adductor	Slc2a1 (Glut1)	UNKNOWN	VIC	NFQ-MGB	24.839		11.521	0.000340277						6	0.000368647
B18	E3KO Control Adductor	18S	UNKNOWN	FAM	NFQ-MGB	13.258									7	0.000287155
B18	E3KO Control Adductor	Slc2a1 (Glut1)	UNKNOWN	VIC	NFQ-MGB	24.921		11.663	0.000308381
C17	E3KO Control Adductor	Slc2a1 (Glut1)	UNKNOWN	FAM	NFQ-MGB	25.948
C17	E3KO Control Adductor	18S	UNKNOWN	VIC	NFQ-MGB	13.978		11.97	0.00024927
C18	E3KO Control Adductor	Slc2a1 (Glut1)	UNKNOWN	FAM	NFQ-MGB	25.023
C18	E3KO Control Adductor	18S	UNKNOWN	VIC	NFQ-MGB	13.238		11.785	0.000283375
D17	E3KO Control Adductor	Slc2a1 (Glut1)	UNKNOWN	FAM	NFQ-MGB	24.776
D17	E3KO Control Adductor	18S	UNKNOWN	VIC	NFQ-MGB	13.033		11.743	0.000291746
D18	E3KO Control Adductor	Slc2a1 (Glut1)	UNKNOWN	FAM	NFQ-MGB	24.805
D18	E3KO Control Adductor	18S	UNKNOWN	VIC	NFQ-MGB	12.934		11.871	0.000266976
E17	E3KO Control Adductor	Slc2a1 (Glut1)	UNKNOWN	FAM	NFQ-MGB	25.283
E17	E3KO Control Adductor	18S	UNKNOWN	VIC	NFQ-MGB	13.114		12.169	0.000217153
E18	E3KO Control Adductor	Slc2a1 (Glut1)	UNKNOWN	FAM	NFQ-MGB	25.341
E18	E3KO Control Adductor	18S	UNKNOWN	VIC	NFQ-MGB	13.275		12.066	0.000233223
F17	E3KO Control Adductor	Slc2a1 (Glut1)	UNKNOWN	FAM	NFQ-MGB	24.716
F17	E3KO Control Adductor	18S	UNKNOWN	VIC	NFQ-MGB	13.214		11.502	0.000344789
F18	E3KO Control Adductor	Slc2a1 (Glut1)	UNKNOWN	FAM	NFQ-MGB	24.76
F18	E3KO Control Adductor	18S	UNKNOWN	VIC	NFQ-MGB	13.445		11.315	0.000392505
G17	E3KO Control Adductor	Slc2a1 (Glut1)	UNKNOWN	FAM	NFQ-MGB	25.275
G17	E3KO Control Adductor	18S	UNKNOWN	VIC	NFQ-MGB	13.62		11.655	0.000310096
G18	E3KO Control Adductor	Slc2a1 (Glut1)	UNKNOWN	FAM	NFQ-MGB	25.34										Average of Technical Replicates	Average of Biological Replicates
G18	E3KO Control Adductor	18S	UNKNOWN	VIC	NFQ-MGB	13.454		11.886	0.000264215						Biological Replicates
A3	ECtrl Ligated Adductor	18S	UNKNOWN	FAM	NFQ-MGB	13.676				0.000372437	2.26118e-05	1.20376	0.0730838		1	0.000386178	Actual	0.000372437
A3	ECtrl Ligated Adductor	Slc2a1 (Glut1)	UNKNOWN	VIC	NFQ-MGB	24.786		11.11	0.000452436						2	0.000361898	Normalized	1.20376
A4	ECtrl Ligated Adductor	18S	UNKNOWN	FAM	NFQ-MGB	13.141									3	0.000395374	Actual SEM	2.86188e-05
A4	ECtrl Ligated Adductor	Slc2a1 (Glut1)	UNKNOWN	VIC	NFQ-MGB	24.751		11.61	0.00031992						4	0.000231267	Normalized SEM	0.0924991
B3	ECtrl Ligated Adductor	18S	UNKNOWN	FAM	NFQ-MGB	13.636									5	0.000417548		Ttest
B3	ECtrl Ligated Adductor	Slc2a1 (Glut1)	UNKNOWN	VIC	NFQ-MGB	24.848		11.212	0.000421553						6	0.000339701	ECtrl. vs. EfCtrl	0.785858
B4	ECtrl Ligated Adductor	18S	UNKNOWN	FAM	NFQ-MGB	13.142									7	0.000475091	ECtrl. vs. E3KO	0.0215026
B4	ECtrl Ligated Adductor	Slc2a1 (Glut1)	UNKNOWN	VIC	NFQ-MGB	24.834		11.692	0.000302244								EfCtrl. vs. E3KO	0.0126736
C3	ECtrl Ligated Adductor	18S	UNKNOWN	FAM	NFQ-MGB	13.681
C3	ECtrl Ligated Adductor	Slc2a1 (Glut1)	UNKNOWN	VIC	NFQ-MGB	24.981		11.3	0.000396607
C4	ECtrl Ligated Adductor	18S	UNKNOWN	FAM	NFQ-MGB	13.678
C4	ECtrl Ligated Adductor	Slc2a1 (Glut1)	UNKNOWN	VIC	NFQ-MGB	24.987		11.309	0.000394141
D3	ECtrl Ligated Adductor	Slc2a1 (Glut1)	UNKNOWN	FAM	NFQ-MGB	25.227
D3	ECtrl Ligated Adductor	18S	UNKNOWN	VIC	NFQ-MGB	13.22		12.007	0.000242959
D4	ECtrl Ligated Adductor	Slc2a1 (Glut1)	UNKNOWN	FAM	NFQ-MGB	25.223
D4	ECtrl Ligated Adductor	18S	UNKNOWN	VIC	NFQ-MGB	13.07		12.153	0.000219575
E3	ECtrl Ligated Adductor	Slc2a1 (Glut1)	UNKNOWN	FAM	NFQ-MGB	24.653
E3	ECtrl Ligated Adductor	18S	UNKNOWN	VIC	NFQ-MGB	13.202		11.451	0.000357195
E4	ECtrl Ligated Adductor	Slc2a1 (Glut1)	UNKNOWN	FAM	NFQ-MGB	24.65
E4	ECtrl Ligated Adductor	18S	UNKNOWN	VIC	NFQ-MGB	13.619		11.031	0.000477901
F3	ECtrl Ligated Adductor	Slc2a1 (Glut1)	UNKNOWN	FAM	NFQ-MGB	24.645
F3	ECtrl Ligated Adductor	18S	UNKNOWN	VIC	NFQ-MGB	13.161		11.484	0.000349117
F4	ECtrl Ligated Adductor	Slc2a1 (Glut1)	UNKNOWN	FAM	NFQ-MGB	24.666
F4	ECtrl Ligated Adductor	18S	UNKNOWN	VIC	NFQ-MGB	13.102		11.564	0.000330285
G3	ECtrl Ligated Adductor	Slc2a1 (Glut1)	UNKNOWN	FAM	NFQ-MGB	24.193
G3	ECtrl Ligated Adductor	18S	UNKNOWN	VIC	NFQ-MGB	13.206		10.987	0.000492701
G4	ECtrl Ligated Adductor	Slc2a1 (Glut1)	UNKNOWN	FAM	NFQ-MGB	24.249										Average of Technical Replicates	Average of Biological Replicates
G4	ECtrl Ligated Adductor	18S	UNKNOWN	VIC	NFQ-MGB	13.155		11.094	0.000457481						Biological Replicates
A11	EfCtrl Ligated Adductor	18S	UNKNOWN	FAM	NFQ-MGB	13.026				0.000360675	2.19577e-05	1.16574	0.0709697		1	0.000306269	Actual	0.000360675
A11	EfCtrl Ligated Adductor	Slc2a1 (Glut1)	UNKNOWN	VIC	NFQ-MGB	24.715		11.689	0.000302873						2	0.000310165	Normalized	1.16574
A12	EfCtrl Ligated Adductor	18S	UNKNOWN	FAM	NFQ-MGB	13.095									3	0.000476615	Actual SEM	3.07275e-05
A12	EfCtrl Ligated Adductor	Slc2a1 (Glut1)	UNKNOWN	VIC	NFQ-MGB	24.752		11.657	0.000309666						4	0.000252473	Normalized SEM	0.0993146
B11	EfCtrl Ligated Adductor	18S	UNKNOWN	FAM	NFQ-MGB	13.026									5	0.000409947
B11	EfCtrl Ligated Adductor	Slc2a1 (Glut1)	UNKNOWN	VIC	NFQ-MGB	24.81		11.784	0.000283572						6	0.000366682
B12	EfCtrl Ligated Adductor	18S	UNKNOWN	FAM	NFQ-MGB	13.306									7	0.000478761
B12	EfCtrl Ligated Adductor	Slc2a1 (Glut1)	UNKNOWN	VIC	NFQ-MGB	24.842		11.536	0.000336758						8	0.000284486
C11	EfCtrl Ligated Adductor	Slc2a1 (Glut1)	UNKNOWN	FAM	NFQ-MGB	24.276
C11	EfCtrl Ligated Adductor	18S	UNKNOWN	VIC	NFQ-MGB	13.223		11.053	0.000470669
C12	EfCtrl Ligated Adductor	Slc2a1 (Glut1)	UNKNOWN	FAM	NFQ-MGB	24.282
C12	EfCtrl Ligated Adductor	18S	UNKNOWN	VIC	NFQ-MGB	13.265		11.017	0.000482562
D11	EfCtrl Ligated Adductor	Slc2a1 (Glut1)	UNKNOWN	FAM	NFQ-MGB	25.267
D11	EfCtrl Ligated Adductor	18S	UNKNOWN	VIC	NFQ-MGB	13.151		12.116	0.000225279
D12	EfCtrl Ligated Adductor	Slc2a1 (Glut1)	UNKNOWN	FAM	NFQ-MGB	25.243
D12	EfCtrl Ligated Adductor	18S	UNKNOWN	VIC	NFQ-MGB	13.439		11.804	0.000279667
E11	EfCtrl Ligated Adductor	Slc2a1 (Glut1)	UNKNOWN	FAM	NFQ-MGB	24.765
E11	EfCtrl Ligated Adductor	18S	UNKNOWN	VIC	NFQ-MGB	13.361		11.404	0.000369024
E12	EfCtrl Ligated Adductor	Slc2a1 (Glut1)	UNKNOWN	FAM	NFQ-MGB	24.793
E12	EfCtrl Ligated Adductor	18S	UNKNOWN	VIC	NFQ-MGB	13.678		11.115	0.000450871
F11	EfCtrl Ligated Adductor	Slc2a1 (Glut1)	UNKNOWN	FAM	NFQ-MGB	25.011
F11	EfCtrl Ligated Adductor	18S	UNKNOWN	VIC	NFQ-MGB	13.489		11.522	0.000340042
F12	EfCtrl Ligated Adductor	Slc2a1 (Glut1)	UNKNOWN	FAM	NFQ-MGB	25.026
F12	EfCtrl Ligated Adductor	18S	UNKNOWN	VIC	NFQ-MGB	13.714		11.312	0.000393323
G11	EfCtrl Ligated Adductor	Slc2a1 (Glut1)	UNKNOWN	FAM	NFQ-MGB	24.768
G11	EfCtrl Ligated Adductor	18S	UNKNOWN	VIC	NFQ-MGB	13.723		11.045	0.000473286
G12	EfCtrl Ligated Adductor	Slc2a1 (Glut1)	UNKNOWN	FAM	NFQ-MGB	24.811
G12	EfCtrl Ligated Adductor	18S	UNKNOWN	VIC	NFQ-MGB	13.799		11.012	0.000484236
H11	EfCtrl Ligated Adductor	Slc2a1 (Glut1)	UNKNOWN	FAM	NFQ-MGB	25.4
H11	EfCtrl Ligated Adductor	18S	UNKNOWN	VIC	NFQ-MGB	13.444		11.956	0.000251701
H12	EfCtrl Ligated Adductor	Slc2a1 (Glut1)	UNKNOWN	FAM	NFQ-MGB	25.333										Average of Technical Replicates	Average of Biological Replicates
H12	EfCtrl Ligated Adductor	18S	UNKNOWN	VIC	NFQ-MGB	13.711		11.622	0.00031727						Biological Replicates
A19	E3KO Ligated Adductor	18S	UNKNOWN	FAM	NFQ-MGB	13.113				0.00087244	0.000129125	2.81982	0.417348		1	0.000748371	Actual	0.00087244
A19	E3KO Ligated Adductor	Slc2a1 (Glut1)	UNKNOWN	VIC	NFQ-MGB	23.486		10.373	0.000754077						2	0.000261515	Normalized	2.81982
A20	E3KO Ligated Adductor	18S	UNKNOWN	FAM	NFQ-MGB	13.102									3	0.000705842	Actual SEM	0.000187091
A20	E3KO Ligated Adductor	Slc2a1 (Glut1)	UNKNOWN	VIC	NFQ-MGB	23.497		10.395	0.000742666						4	0.00127674	Normalized SEM	0.604697
B19	E3KO Ligated Adductor	18S	UNKNOWN	FAM	NFQ-MGB	13.021									5	0.00032795
B19	E3KO Ligated Adductor	Slc2a1 (Glut1)	UNKNOWN	VIC	NFQ-MGB	24.945		11.924	0.000257347						6	0.00155327
B20	E3KO Ligated Adductor	18S	UNKNOWN	FAM	NFQ-MGB	13.107									7	0.00123339
B20	E3KO Ligated Adductor	Slc2a1 (Glut1)	UNKNOWN	VIC	NFQ-MGB	24.985		11.878	0.000265684
C19	E3KO Ligated Adductor	Slc2a1 (Glut1)	UNKNOWN	FAM	NFQ-MGB	23.643
C19	E3KO Ligated Adductor	18S	UNKNOWN	VIC	NFQ-MGB	13.194		10.449	0.000715382
C20	E3KO Ligated Adductor	Slc2a1 (Glut1)	UNKNOWN	FAM	NFQ-MGB	23.675
C20	E3KO Ligated Adductor	18S	UNKNOWN	VIC	NFQ-MGB	13.187		10.488	0.000696302
D19	E3KO Ligated Adductor	Slc2a1 (Glut1)	UNKNOWN	FAM	NFQ-MGB	23.092
D19	E3KO Ligated Adductor	18S	UNKNOWN	VIC	NFQ-MGB	13.62		9.472	0.00140813
D20	E3KO Ligated Adductor	Slc2a1 (Glut1)	UNKNOWN	FAM	NFQ-MGB	23.12
D20	E3KO Ligated Adductor	18S	UNKNOWN	VIC	NFQ-MGB	13.35		9.77	0.00114535
E19	E3KO Ligated Adductor	Slc2a1 (Glut1)	UNKNOWN	FAM	NFQ-MGB	24.854
E19	E3KO Ligated Adductor	18S	UNKNOWN	VIC	NFQ-MGB	13.232		11.622	0.00031727
E20	E3KO Ligated Adductor	Slc2a1 (Glut1)	UNKNOWN	FAM	NFQ-MGB	24.869
E20	E3KO Ligated Adductor	18S	UNKNOWN	VIC	NFQ-MGB	13.341		11.528	0.000338631
F19	E3KO Ligated Adductor	Slc2a1 (Glut1)	UNKNOWN	FAM	NFQ-MGB	22.779
F19	E3KO Ligated Adductor	18S	UNKNOWN	VIC	NFQ-MGB	13.487		9.292	0.00159525
F20	E3KO Ligated Adductor	Slc2a1 (Glut1)	UNKNOWN	FAM	NFQ-MGB	22.839
F20	E3KO Ligated Adductor	18S	UNKNOWN	VIC	NFQ-MGB	13.469		9.37	0.00151129
G19	E3KO Ligated Adductor	Slc2a1 (Glut1)	UNKNOWN	FAM	NFQ-MGB	23.209
G19	E3KO Ligated Adductor	18S	UNKNOWN	VIC	NFQ-MGB	13.729		9.48	0.00140035
G20	E3KO Ligated Adductor	Slc2a1 (Glut1)	UNKNOWN	FAM	NFQ-MGB	23.207										Average of Technical Replicates	Average of Biological Replicates
G20	E3KO Ligated Adductor	18S	UNKNOWN	VIC	NFQ-MGB	13.334		9.873	0.00106643						Biological Replicates
A5	ECtrl Control Calf	18S	UNKNOWN	FAM	NFQ-MGB	13.241				0.000267717	1.6726e-05	1	0.0624763		1	0.0002052	Actual	0.000267717
A5	ECtrl Control Calf	Slc2a1 (Glut1)	UNKNOWN	VIC	NFQ-MGB	25.421		12.18	0.000215504						2	0.000239193	Normalized	1
A6	ECtrl Control Calf	18S	UNKNOWN	FAM	NFQ-MGB	13.049									3	0.000321432	Actual SEM	2.26833e-05
A6	ECtrl Control Calf	Slc2a1 (Glut1)	UNKNOWN	VIC	NFQ-MGB	25.374		12.325	0.000194897						4	0.000248785	Normalized SEM	0.0847284
B5	ECtrl Control Calf	18S	UNKNOWN	FAM	NFQ-MGB	13.178									5	0.000195216		Ttest
B5	ECtrl Control Calf	Slc2a1 (Glut1)	UNKNOWN	VIC	NFQ-MGB	25.274		12.096	0.000228424						6	0.000339115	ECtrl. vs. EfCtrl	0.588665
B6	ECtrl Control Calf	18S	UNKNOWN	FAM	NFQ-MGB	13.318									7	0.000325081	ECtrl. vs. E3KO	0.00939149
B6	ECtrl Control Calf	Slc2a1 (Glut1)	UNKNOWN	VIC	NFQ-MGB	25.284		11.966	0.000249963								EfCtrl. vs. E3KO	0.0038562
C5	ECtrl Control Calf	Slc2a1 (Glut1)	UNKNOWN	FAM	NFQ-MGB	24.769
C5	ECtrl Control Calf	18S	UNKNOWN	VIC	NFQ-MGB	13.213		11.556	0.000332122
C6	ECtrl Control Calf	Slc2a1 (Glut1)	UNKNOWN	FAM	NFQ-MGB	24.733
C6	ECtrl Control Calf	18S	UNKNOWN	VIC	NFQ-MGB	13.081		11.652	0.000310741
D5	ECtrl Control Calf	Slc2a1 (Glut1)	UNKNOWN	FAM	NFQ-MGB	24.812
D5	ECtrl Control Calf	18S	UNKNOWN	VIC	NFQ-MGB	12.883		11.929	0.000256456
D6	ECtrl Control Calf	Slc2a1 (Glut1)	UNKNOWN	FAM	NFQ-MGB	24.838
D6	ECtrl Control Calf	18S	UNKNOWN	VIC	NFQ-MGB	12.82		12.018	0.000241114
E5	ECtrl Control Calf	Slc2a1 (Glut1)	UNKNOWN	FAM	NFQ-MGB	25.001
E5	ECtrl Control Calf	18S	UNKNOWN	VIC	NFQ-MGB	12.351		12.65	0.000155586
E6	ECtrl Control Calf	Slc2a1 (Glut1)	UNKNOWN	FAM	NFQ-MGB	24.967
E6	ECtrl Control Calf	18S	UNKNOWN	VIC	NFQ-MGB	12.911		12.056	0.000234846
F5	ECtrl Control Calf	Slc2a1 (Glut1)	UNKNOWN	FAM	NFQ-MGB	24.754
F5	ECtrl Control Calf	18S	UNKNOWN	VIC	NFQ-MGB	13.319		11.435	0.000361179
F6	ECtrl Control Calf	Slc2a1 (Glut1)	UNKNOWN	FAM	NFQ-MGB	24.765
F6	ECtrl Control Calf	18S	UNKNOWN	VIC	NFQ-MGB	13.142		11.623	0.000317051
G5	ECtrl Control Calf	Slc2a1 (Glut1)	UNKNOWN	FAM	NFQ-MGB	24.984
G5	ECtrl Control Calf	18S	UNKNOWN	VIC	NFQ-MGB	13.221		11.763	0.000287729
G6	ECtrl Control Calf	Slc2a1 (Glut1)	UNKNOWN	FAM	NFQ-MGB	25.013										Average of Technical Replicates	Average of Biological Replicates
G6	ECtrl Control Calf	18S	UNKNOWN	VIC	NFQ-MGB	13.583		11.43	0.000362432						Biological Replicates
A13	EfCtrl Control Calf	18S	UNKNOWN	FAM	NFQ-MGB	12.9				0.000248871	1.82145e-05	0.929603	0.0680362		1	0.000149237	Actual	0.000248871
A13	EfCtrl Control Calf	Slc2a1 (Glut1)	UNKNOWN	VIC	NFQ-MGB	25.508		12.608	0.000160182						2	0.000196768	Normalized	0.929603
A14	EfCtrl Control Calf	18S	UNKNOWN	FAM	NFQ-MGB	12.738									3	0.000289007	Actual SEM	2.48063e-05
A14	EfCtrl Control Calf	Slc2a1 (Glut1)	UNKNOWN	VIC	NFQ-MGB	25.558		12.82	0.000138291						4	0.000226695	Normalized SEM	0.0996753
B13	EfCtrl Control Calf	18S	UNKNOWN	FAM	NFQ-MGB	13.08									5	0.000212488
B13	EfCtrl Control Calf	Slc2a1 (Glut1)	UNKNOWN	VIC	NFQ-MGB	25.42		12.34	0.000192881						6	0.000229263
B14	EfCtrl Control Calf	18S	UNKNOWN	FAM	NFQ-MGB	13.14									7	0.000344503
B14	EfCtrl Control Calf	Slc2a1 (Glut1)	UNKNOWN	VIC	NFQ-MGB	25.423		12.283	0.000200654						8	0.000343007
C13	EfCtrl Control Calf	Slc2a1 (Glut1)	UNKNOWN	FAM	NFQ-MGB	25.208
C13	EfCtrl Control Calf	18S	UNKNOWN	VIC	NFQ-MGB	13.254		11.954	0.00025205
C14	EfCtrl Control Calf	Slc2a1 (Glut1)	UNKNOWN	FAM	NFQ-MGB	25.102
C14	EfCtrl Control Calf	18S	UNKNOWN	VIC	NFQ-MGB	13.519		11.583	0.000325964
D13	EfCtrl Control Calf	Slc2a1 (Glut1)	UNKNOWN	FAM	NFQ-MGB	25.28
D13	EfCtrl Control Calf	18S	UNKNOWN	VIC	NFQ-MGB	13.162		12.118	0.000224967
D14	EfCtrl Control Calf	Slc2a1 (Glut1)	UNKNOWN	FAM	NFQ-MGB	25.367
D14	EfCtrl Control Calf	18S	UNKNOWN	VIC	NFQ-MGB	13.271		12.096	0.000228424
E13	EfCtrl Control Calf	Slc2a1 (Glut1)	UNKNOWN	FAM	NFQ-MGB	25.398
E13	EfCtrl Control Calf	18S	UNKNOWN	VIC	NFQ-MGB	13.241		12.157	0.000218967
E14	EfCtrl Control Calf	Slc2a1 (Glut1)	UNKNOWN	FAM	NFQ-MGB	25.384
E14	EfCtrl Control Calf	18S	UNKNOWN	VIC	NFQ-MGB	13.139		12.245	0.00020601
F13	EfCtrl Control Calf	Slc2a1 (Glut1)	UNKNOWN	FAM	NFQ-MGB	25.448
F13	EfCtrl Control Calf	18S	UNKNOWN	VIC	NFQ-MGB	13.417		12.031	0.000238951
F14	EfCtrl Control Calf	Slc2a1 (Glut1)	UNKNOWN	FAM	NFQ-MGB	25.478
F14	EfCtrl Control Calf	18S	UNKNOWN	VIC	NFQ-MGB	13.325		12.153	0.000219575
G13	EfCtrl Control Calf	Slc2a1 (Glut1)	UNKNOWN	FAM	NFQ-MGB	25.1
G13	EfCtrl Control Calf	18S	UNKNOWN	VIC	NFQ-MGB	13.379		11.721	0.000296229
G14	EfCtrl Control Calf	Slc2a1 (Glut1)	UNKNOWN	FAM	NFQ-MGB	25.184
G14	EfCtrl Control Calf	18S	UNKNOWN	VIC	NFQ-MGB	13.87		11.314	0.000392777
H13	EfCtrl Control Calf	Slc2a1 (Glut1)	UNKNOWN	FAM	NFQ-MGB	25.033
H13	EfCtrl Control Calf	18S	UNKNOWN	VIC	NFQ-MGB	13.358		11.675	0.000305826
H14	EfCtrl Control Calf	Slc2a1 (Glut1)	UNKNOWN	FAM	NFQ-MGB	25.045										Average of Technical Replicates	Average of Biological Replicates
H14	EfCtrl Control Calf	18S	UNKNOWN	VIC	NFQ-MGB	13.684		11.361	0.000380188						Biological Replicates
A21	E3KO Control Calf	18S	UNKNOWN	FAM	NFQ-MGB	14.196				0.000465354	4.22668e-05	1.73823	0.157878		1	0.000671639	Actual	0.000465354
A21	E3KO Control Calf	Slc2a1 (Glut1)	UNKNOWN	VIC	NFQ-MGB	24.684		10.488	0.000696302						2	0.000292232	Normalized	1.73823
A22	E3KO Control Calf	18S	UNKNOWN	FAM	NFQ-MGB	14.183									3	0.000435809	Actual SEM	5.98399e-05
A22	E3KO Control Calf	Slc2a1 (Glut1)	UNKNOWN	VIC	NFQ-MGB	24.777		10.594	0.000646976						4	0.000516403	Normalized SEM	0.223519
B21	E3KO Control Calf	18S	UNKNOWN	FAM	NFQ-MGB	13.263									5	0.000280741
B21	E3KO Control Calf	Slc2a1 (Glut1)	UNKNOWN	VIC	NFQ-MGB	24.97		11.707	0.000299118						6	0.000656553
B22	E3KO Control Calf	18S	UNKNOWN	FAM	NFQ-MGB	13.209									7	0.000404103
B22	E3KO Control Calf	Slc2a1 (Glut1)	UNKNOWN	VIC	NFQ-MGB	24.984		11.775	0.000285346
C21	E3KO Control Calf	Slc2a1 (Glut1)	UNKNOWN	FAM	NFQ-MGB	24.629
C21	E3KO Control Calf	18S	UNKNOWN	VIC	NFQ-MGB	13.58		11.049	0.000471976
C22	E3KO Control Calf	Slc2a1 (Glut1)	UNKNOWN	FAM	NFQ-MGB	24.611
C22	E3KO Control Calf	18S	UNKNOWN	VIC	NFQ-MGB	13.322		11.289	0.000399643
D21	E3KO Control Calf	Slc2a1 (Glut1)	UNKNOWN	FAM	NFQ-MGB	24.904
D21	E3KO Control Calf	18S	UNKNOWN	VIC	NFQ-MGB	13.722		11.182	0.00043041
D22	E3KO Control Calf	Slc2a1 (Glut1)	UNKNOWN	FAM	NFQ-MGB	24.988
D22	E3KO Control Calf	18S	UNKNOWN	VIC	NFQ-MGB	14.291		10.697	0.000602396
E21	E3KO Control Calf	Slc2a1 (Glut1)	UNKNOWN	FAM	NFQ-MGB	25.149
E21	E3KO Control Calf	18S	UNKNOWN	VIC	NFQ-MGB	13.295		11.854	0.000270141
E22	E3KO Control Calf	Slc2a1 (Glut1)	UNKNOWN	FAM	NFQ-MGB	25.135
E22	E3KO Control Calf	18S	UNKNOWN	VIC	NFQ-MGB	13.39		11.745	0.000291342
F21	E3KO Control Calf	Slc2a1 (Glut1)	UNKNOWN	FAM	NFQ-MGB	24.39
F21	E3KO Control Calf	18S	UNKNOWN	VIC	NFQ-MGB	13.841		10.549	0.000667474
F22	E3KO Control Calf	Slc2a1 (Glut1)	UNKNOWN	FAM	NFQ-MGB	24.435
F22	E3KO Control Calf	18S	UNKNOWN	VIC	NFQ-MGB	13.838		10.597	0.000645633
G21	E3KO Control Calf	Slc2a1 (Glut1)	UNKNOWN	FAM	NFQ-MGB	24.843
G21	E3KO Control Calf	18S	UNKNOWN	VIC	NFQ-MGB	13.376		11.467	0.000353256
G22	E3KO Control Calf	Slc2a1 (Glut1)	UNKNOWN	FAM	NFQ-MGB	24.888										Average of Technical Replicates	Average of Biological Replicates
G22	E3KO Control Calf	18S	UNKNOWN	VIC	NFQ-MGB	13.786		11.102	0.000454951						Biological Replicates
A7	ECtrl Ligated Calf	18S	UNKNOWN	FAM	NFQ-MGB	13.18				0.000408061	2.0767e-05	1.52422	0.0775704		1	0.000444074	Actual	0.000408061
A7	ECtrl Ligated Calf	Slc2a1 (Glut1)	UNKNOWN	VIC	NFQ-MGB	24.301		11.121	0.000448999						2	0.000382578	Normalized	1.52422
A8	ECtrl Ligated Calf	18S	UNKNOWN	FAM	NFQ-MGB	13.136									3	0.000363399	Actual SEM	3.0324e-05
A8	ECtrl Ligated Calf	Slc2a1 (Glut1)	UNKNOWN	VIC	NFQ-MGB	24.289		11.153	0.00043915						4	0.000414925	Normalized SEM	0.113269
B7	ECtrl Ligated Calf	18S	UNKNOWN	FAM	NFQ-MGB	13.055									5	0.000292881		Ttest
B7	ECtrl Ligated Calf	Slc2a1 (Glut1)	UNKNOWN	VIC	NFQ-MGB	24.418		11.363	0.000379661						6	0.000554187	ECtrl. vs. EfCtrl	0.980211
B8	ECtrl Ligated Calf	18S	UNKNOWN	FAM	NFQ-MGB	13.124									7	0.00040438	ECtrl. vs. E3KO	0.0446183
B8	ECtrl Ligated Calf	Slc2a1 (Glut1)	UNKNOWN	VIC	NFQ-MGB	24.465		11.341	0.000385495								EfCtrl. vs. E3KO	0.0314667
C7	ECtrl Ligated Calf	Slc2a1 (Glut1)	UNKNOWN	FAM	NFQ-MGB	24.411
C7	ECtrl Ligated Calf	18S	UNKNOWN	VIC	NFQ-MGB	13.016		11.395	0.000371333
C8	ECtrl Ligated Calf	Slc2a1 (Glut1)	UNKNOWN	FAM	NFQ-MGB	24.492
C8	ECtrl Ligated Calf	18S	UNKNOWN	VIC	NFQ-MGB	13.034		11.458	0.000355466
D7	ECtrl Ligated Calf	Slc2a1 (Glut1)	UNKNOWN	FAM	NFQ-MGB	24.369
D7	ECtrl Ligated Calf	18S	UNKNOWN	VIC	NFQ-MGB	13.154		11.215	0.000420677
D8	ECtrl Ligated Calf	Slc2a1 (Glut1)	UNKNOWN	FAM	NFQ-MGB	24.385
D8	ECtrl Ligated Calf	18S	UNKNOWN	VIC	NFQ-MGB	13.13		11.255	0.000409173
E7	ECtrl Ligated Calf	Slc2a1 (Glut1)	UNKNOWN	FAM	NFQ-MGB	24.907
E7	ECtrl Ligated Calf	18S	UNKNOWN	VIC	NFQ-MGB	13.064		11.843	0.000272209
E8	ECtrl Ligated Calf	Slc2a1 (Glut1)	UNKNOWN	FAM	NFQ-MGB	24.908
E8	ECtrl Ligated Calf	18S	UNKNOWN	VIC	NFQ-MGB	13.269		11.639	0.000313553
F7	ECtrl Ligated Calf	Slc2a1 (Glut1)	UNKNOWN	FAM	NFQ-MGB	23.916
F7	ECtrl Ligated Calf	18S	UNKNOWN	VIC	NFQ-MGB	13.12		10.796	0.000562445
F8	ECtrl Ligated Calf	Slc2a1 (Glut1)	UNKNOWN	FAM	NFQ-MGB	23.959
F8	ECtrl Ligated Calf	18S	UNKNOWN	VIC	NFQ-MGB	13.12		10.839	0.000545929
G7	ECtrl Ligated Calf	Slc2a1 (Glut1)	UNKNOWN	FAM	NFQ-MGB	24.39
G7	ECtrl Ligated Calf	18S	UNKNOWN	VIC	NFQ-MGB	13.117		11.273	0.0004041
G8	ECtrl Ligated Calf	Slc2a1 (Glut1)	UNKNOWN	FAM	NFQ-MGB	24.332										Average of Technical Replicates	Average of Biological Replicates
G8	ECtrl Ligated Calf	18S	UNKNOWN	VIC	NFQ-MGB	13.061		11.271	0.00040466						Biological Replicates
A15	EfCtrl Ligated Calf	18S	UNKNOWN	FAM	NFQ-MGB	13.576				0.000406966	2.27838e-05	1.52013	0.0851039		1	0.000544778	Actual	0.000406966
A15	EfCtrl Ligated Calf	Slc2a1 (Glut1)	UNKNOWN	VIC	NFQ-MGB	24.231		10.655	0.000620191						2	0.000389597	Normalized	1.52013
A16	EfCtrl Ligated Calf	18S	UNKNOWN	FAM	NFQ-MGB	13.163									3	0.000254813	Actual SEM	3.05595e-05
A16	EfCtrl Ligated Calf	Slc2a1 (Glut1)	UNKNOWN	VIC	NFQ-MGB	24.22		11.057	0.000469366						4	0.000349158	Normalized SEM	0.114148
B15	EfCtrl Ligated Calf	18S	UNKNOWN	FAM	NFQ-MGB	14.167									5	0.000382939
B15	EfCtrl Ligated Calf	Slc2a1 (Glut1)	UNKNOWN	VIC	NFQ-MGB	25.465		11.298	0.000397158						6	0.000474436
B16	EfCtrl Ligated Calf	18S	UNKNOWN	FAM	NFQ-MGB	14.092									7	0.000442657
B16	EfCtrl Ligated Calf	Slc2a1 (Glut1)	UNKNOWN	VIC	NFQ-MGB	25.446		11.354	0.000382037						8	0.000417353
C15	EfCtrl Ligated Calf	Slc2a1 (Glut1)	UNKNOWN	FAM	NFQ-MGB	25.355
C15	EfCtrl Ligated Calf	18S	UNKNOWN	VIC	NFQ-MGB	13.265		12.09	0.000229376
C16	EfCtrl Ligated Calf	Slc2a1 (Glut1)	UNKNOWN	FAM	NFQ-MGB	25.393
C16	EfCtrl Ligated Calf	18S	UNKNOWN	VIC	NFQ-MGB	13.592		11.801	0.00028025
D15	EfCtrl Ligated Calf	Slc2a1 (Glut1)	UNKNOWN	FAM	NFQ-MGB	24.555
D15	EfCtrl Ligated Calf	18S	UNKNOWN	VIC	NFQ-MGB	13.093		11.462	0.000354482
D16	EfCtrl Ligated Calf	Slc2a1 (Glut1)	UNKNOWN	FAM	NFQ-MGB	24.535
D16	EfCtrl Ligated Calf	18S	UNKNOWN	VIC	NFQ-MGB	13.029		11.506	0.000343834
E15	EfCtrl Ligated Calf	Slc2a1 (Glut1)	UNKNOWN	FAM	NFQ-MGB	24.503
E15	EfCtrl Ligated Calf	18S	UNKNOWN	VIC	NFQ-MGB	13.118		11.385	0.000373915
E16	EfCtrl Ligated Calf	Slc2a1 (Glut1)	UNKNOWN	FAM	NFQ-MGB	24.557
E16	EfCtrl Ligated Calf	18S	UNKNOWN	VIC	NFQ-MGB	13.24		11.317	0.000391962
F15	EfCtrl Ligated Calf	Slc2a1 (Glut1)	UNKNOWN	FAM	NFQ-MGB	24.983
F15	EfCtrl Ligated Calf	18S	UNKNOWN	VIC	NFQ-MGB	13.943		11.04	0.000474929
F16	EfCtrl Ligated Calf	Slc2a1 (Glut1)	UNKNOWN	FAM	NFQ-MGB	25.032
F16	EfCtrl Ligated Calf	18S	UNKNOWN	VIC	NFQ-MGB	13.989		11.043	0.000473943
G15	EfCtrl Ligated Calf	Slc2a1 (Glut1)	UNKNOWN	FAM	NFQ-MGB	24.642
G15	EfCtrl Ligated Calf	18S	UNKNOWN	VIC	NFQ-MGB	13.678		10.964	0.000500619
G16	EfCtrl Ligated Calf	Slc2a1 (Glut1)	UNKNOWN	FAM	NFQ-MGB	24.761
G16	EfCtrl Ligated Calf	18S	UNKNOWN	VIC	NFQ-MGB	13.417		11.344	0.000384694
H15	EfCtrl Ligated Calf	Slc2a1 (Glut1)	UNKNOWN	FAM	NFQ-MGB	24.543
H15	EfCtrl Ligated Calf	18S	UNKNOWN	VIC	NFQ-MGB	13.356		11.187	0.000428921
H16	EfCtrl Ligated Calf	Slc2a1 (Glut1)	UNKNOWN	FAM	NFQ-MGB	24.585										Average of Technical Replicates	Average of Biological Replicates
H16	EfCtrl Ligated Calf	18S	UNKNOWN	VIC	NFQ-MGB	13.318		11.267	0.000405784						Biological Replicates
A23	E3KO Ligated Calf	18S	UNKNOWN	FAM	NFQ-MGB	13.725				0.0335489	0.0101348	125.315	37.8563		1	0.00244506	Actual	0.0335489
A23	E3KO Ligated Calf	Slc2a1 (Glut1)	UNKNOWN	VIC	NFQ-MGB	22.21		8.485	0.00279101						2	0.000481934	Normalized	125.315
A24	E3KO Ligated Calf	18S	UNKNOWN	FAM	NFQ-MGB	13.324									3	0.00301449	Actual SEM	0.0147803
A24	E3KO Ligated Calf	Slc2a1 (Glut1)	UNKNOWN	VIC	NFQ-MGB	22.22		8.896	0.00209912						4	0.0395109	Normalized SEM	55.2088
B23	E3KO Ligated Calf	18S	UNKNOWN	FAM	NFQ-MGB	13.688									5	0.0151078
B23	E3KO Ligated Calf	Slc2a1 (Glut1)	UNKNOWN	VIC	NFQ-MGB	24.488		10.8	0.000560887						6	0.0927162
B24	E3KO Ligated Calf	18S	UNKNOWN	FAM	NFQ-MGB	13.264									7	0.0815661
B24	E3KO Ligated Calf	Slc2a1 (Glut1)	UNKNOWN	VIC	NFQ-MGB	24.541		11.277	0.000402981
C23	E3KO Ligated Calf	Slc2a1 (Glut1)	UNKNOWN	FAM	NFQ-MGB	21.89
C23	E3KO Ligated Calf	18S	UNKNOWN	VIC	NFQ-MGB	13.36		8.53	0.00270529
C24	E3KO Ligated Calf	Slc2a1 (Glut1)	UNKNOWN	FAM	NFQ-MGB	21.907
C24	E3KO Ligated Calf	18S	UNKNOWN	VIC	NFQ-MGB	13.674		8.233	0.00332369
D23	E3KO Ligated Calf	Slc2a1 (Glut1)	UNKNOWN	FAM	NFQ-MGB	24.82
D23	E3KO Ligated Calf	18S	UNKNOWN	VIC	NFQ-MGB	20.325		4.495	0.0443476
D24	E3KO Ligated Calf	Slc2a1 (Glut1)	UNKNOWN	FAM	NFQ-MGB	24.835
D24	E3KO Ligated Calf	18S	UNKNOWN	VIC	NFQ-MGB	19.985		4.85	0.0346741
E23	E3KO Ligated Calf	Slc2a1 (Glut1)	UNKNOWN	FAM	NFQ-MGB	24.186
E23	E3KO Ligated Calf	18S	UNKNOWN	VIC	NFQ-MGB	17.931		6.255	0.0130935
E24	E3KO Ligated Calf	Slc2a1 (Glut1)	UNKNOWN	FAM	NFQ-MGB	24.198
E24	E3KO Ligated Calf	18S	UNKNOWN	VIC	NFQ-MGB	18.33		5.868	0.0171221
F23	E3KO Ligated Calf	Slc2a1 (Glut1)	UNKNOWN	FAM	NFQ-MGB	21.747
F23	E3KO Ligated Calf	18S	UNKNOWN	VIC	NFQ-MGB	18.468		3.279	0.10302
F24	E3KO Ligated Calf	Slc2a1 (Glut1)	UNKNOWN	FAM	NFQ-MGB	21.75
F24	E3KO Ligated Calf	18S	UNKNOWN	VIC	NFQ-MGB	18.149		3.601	0.0824121
G23	E3KO Ligated Calf	Slc2a1 (Glut1)	UNKNOWN	FAM	NFQ-MGB	21.741
G23	E3KO Ligated Calf	18S	UNKNOWN	VIC	NFQ-MGB	18.23		3.511	0.087717
G24	E3KO Ligated Calf	Slc2a1 (Glut1)	UNKNOWN	FAM	NFQ-MGB	21.777
G24	E3KO Ligated Calf	18S	UNKNOWN	VIC	NFQ-MGB	18.048		3.729	0.0754152

## Sheet: Panel E
																Averages of Technical Replicates	Average of Biological Replicates
															Biological Replicates
Well	Sample Name	Target Name	Task	Reporter	Quencher	CT		ΔCт	RQ	AVE RQ	SE RQ	Normalized Ave RQ	Norm SE RQ								Adductor		Calf
I1	ECtrl Control Adductor	18S	UNKNOWN	FAM	NFQ-MGB	13.613				6.44768e-05	1.16436e-05	1	0.180586		1	4.06079e-05	Actual	6.44768e-05			Control	Ligated	Control	Ligated
I1	ECtrl Control Adductor	Emr1	UNKNOWN	VIC	NFQ-MGB	27.92		14.307	4.9336e-05						2	3.03812e-05	Normalized	1		ECtrl	1	1.82037	1	12.4699
I2	ECtrl Control Adductor	18S	UNKNOWN	FAM	NFQ-MGB	13.051									3	2.72508e-05	Actual SEM	1.69712e-05		EfCtrl	0.917241	3.18706	1.11344	14.4598
I2	ECtrl Control Adductor	Emr1	UNKNOWN	VIC	NFQ-MGB	27.988		14.937	3.18797e-05						4	4.0703e-05	Normalized SEM	0.263213		E3KO	1.5982	6.02315	1.65601	14.3656
J1	ECtrl Control Adductor	Emr1	UNKNOWN	FAM	NFQ-MGB	29.088									5	5.56274e-05		Ttest
J1	ECtrl Control Adductor	18S	UNKNOWN	VIC	NFQ-MGB	14.092		14.996	3.06023e-05						6	0.000137525	ECtrl. vs. EfCtrl	0.801888			SEM	SEM	SEM	SEM
J2	ECtrl Control Adductor	Emr1	UNKNOWN	FAM	NFQ-MGB	29.109									7	0.000119242	ECtrl. vs. E3KO	0.174034		ECtrl	0.263213	0.314348	0.219505	3.69962
J2	ECtrl Control Adductor	18S	UNKNOWN	VIC	NFQ-MGB	14.092		15.017	3.01601e-05								EfCtrl. vs. E3KO	0.0843833		EfCtrl	0.21405	0.462186	0.0949156	4.04143
K1	ECtrl Control Adductor	Emr1	UNKNOWN	FAM	NFQ-MGB	28.688														E3KO	0.319489	1.3606	0.302188	3.49831
K1	ECtrl Control Adductor	18S	UNKNOWN	VIC	NFQ-MGB	13.716		14.972	3.11156e-05
K2	ECtrl Control Adductor	Emr1	UNKNOWN	FAM	NFQ-MGB	28.583
K2	ECtrl Control Adductor	18S	UNKNOWN	VIC	NFQ-MGB	13.199		15.384	2.33859e-05
L1	ECtrl Control Adductor	Emr1	UNKNOWN	FAM	NFQ-MGB	27.888
L1	ECtrl Control Adductor	18S	UNKNOWN	VIC	NFQ-MGB	13.424		14.464	4.42488e-05
L2	ECtrl Control Adductor	Emr1	UNKNOWN	FAM	NFQ-MGB	27.955
L2	ECtrl Control Adductor	18S	UNKNOWN	VIC	NFQ-MGB	13.239		14.716	3.71572e-05
M1	ECtrl Control Adductor	Emr1	UNKNOWN	FAM	NFQ-MGB	28.116
M1	ECtrl Control Adductor	18S	UNKNOWN	VIC	NFQ-MGB	13.938		14.178	5.39507e-05
M2	ECtrl Control Adductor	Emr1	UNKNOWN	FAM	NFQ-MGB	28.037
M2	ECtrl Control Adductor	18S	UNKNOWN	VIC	NFQ-MGB	13.946		14.091	5.73042e-05
N1	ECtrl Control Adductor	Emr1	UNKNOWN	FAM	NFQ-MGB	26.088
N1	ECtrl Control Adductor	18S	UNKNOWN	VIC	NFQ-MGB	13.375		12.713	0.000148938
N2	ECtrl Control Adductor	Emr1	UNKNOWN	FAM	NFQ-MGB	26.153
N2	ECtrl Control Adductor	18S	UNKNOWN	VIC	NFQ-MGB	13.2		12.953	0.000126113
O1	ECtrl Control Adductor	Emr1	UNKNOWN	FAM	NFQ-MGB	26.72
O1	ECtrl Control Adductor	18S	UNKNOWN	VIC	NFQ-MGB	13.709		13.011	0.000121143
O2	ECtrl Control Adductor	Emr1	UNKNOWN	FAM	NFQ-MGB	26.825										Average of Technical Replicates	Average of Biological Replicates
O2	ECtrl Control Adductor	18S	UNKNOWN	VIC	NFQ-MGB	13.768		13.057	0.000117341						Biological Replicates
I9	EfCtrl Control Adductor	18S	UNKNOWN	FAM	NFQ-MGB	13.77				5.91408e-05	8.68315e-06	0.917241	0.134671		1	0.000131327	Actual	5.91408e-05
I9	EfCtrl Control Adductor	Emr1	UNKNOWN	VIC	NFQ-MGB	26.629		12.859	0.000134603						2	6.29784e-05	Normalized	0.917241
I10	EfCtrl Control Adductor	Emr1	UNKNOWN	FAM	NFQ-MGB	26.656									3	3.72515e-05	Actual SEM	1.26591e-05
I10	EfCtrl Control Adductor	18S	UNKNOWN	VIC	NFQ-MGB	13.725		12.931	0.00012805						4	8.85349e-05	Normalized SEM	0.21405
J9	EfCtrl Control Adductor	Emr1	UNKNOWN	FAM	NFQ-MGB	27.221									5	5.72354e-05
J9	EfCtrl Control Adductor	18S	UNKNOWN	VIC	NFQ-MGB	13.344		13.877	6.64671e-05						6	2.73958e-05
J10	EfCtrl Control Adductor	Emr1	UNKNOWN	FAM	NFQ-MGB	27.253									7	4.28658e-05
J10	EfCtrl Control Adductor	18S	UNKNOWN	VIC	NFQ-MGB	13.216		14.037	5.94897e-05						8	2.5538e-05
K9	EfCtrl Control Adductor	Emr1	UNKNOWN	FAM	NFQ-MGB	27.878
K9	EfCtrl Control Adductor	18S	UNKNOWN	VIC	NFQ-MGB	13.258		14.62	3.97138e-05
K10	EfCtrl Control Adductor	Emr1	UNKNOWN	FAM	NFQ-MGB	27.969
K10	EfCtrl Control Adductor	18S	UNKNOWN	VIC	NFQ-MGB	13.158		14.811	3.47892e-05
L9	EfCtrl Control Adductor	Emr1	UNKNOWN	FAM	NFQ-MGB	27.235
L9	EfCtrl Control Adductor	18S	UNKNOWN	VIC	NFQ-MGB	13.789		13.446	8.96087e-05
L10	EfCtrl Control Adductor	Emr1	UNKNOWN	FAM	NFQ-MGB	27.18
L10	EfCtrl Control Adductor	18S	UNKNOWN	VIC	NFQ-MGB	13.699		13.481	8.7461e-05
M9	EfCtrl Control Adductor	Emr1	UNKNOWN	FAM	NFQ-MGB	27.276
M9	EfCtrl Control Adductor	18S	UNKNOWN	VIC	NFQ-MGB	13.29		13.986	6.16304e-05
M10	EfCtrl Control Adductor	Emr1	UNKNOWN	FAM	NFQ-MGB	27.327
M10	EfCtrl Control Adductor	18S	UNKNOWN	VIC	NFQ-MGB	13.119		14.208	5.28404e-05
N9	EfCtrl Control Adductor	Emr1	UNKNOWN	FAM	NFQ-MGB	28.57
N9	EfCtrl Control Adductor	18S	UNKNOWN	VIC	NFQ-MGB	13.141		15.429	2.26677e-05
N10	EfCtrl Control Adductor	Emr1	UNKNOWN	FAM	NFQ-MGB	28.545
N10	EfCtrl Control Adductor	18S	UNKNOWN	VIC	NFQ-MGB	13.619		14.926	3.21238e-05
O9	EfCtrl Control Adductor	Emr1	UNKNOWN	FAM	NFQ-MGB	27.599
O9	EfCtrl Control Adductor	18S	UNKNOWN	VIC	NFQ-MGB	13.133		14.466	4.41875e-05
O10	EfCtrl Control Adductor	Emr1	UNKNOWN	FAM	NFQ-MGB	27.616
O10	EfCtrl Control Adductor	18S	UNKNOWN	VIC	NFQ-MGB	13.061		14.555	4.1544e-05
P9	EfCtrl Control Adductor	Emr1	UNKNOWN	FAM	NFQ-MGB	28.317
P9	EfCtrl Control Adductor	18S	UNKNOWN	VIC	NFQ-MGB	13.056		15.261	2.54672e-05
P10	EfCtrl Control Adductor	Emr1	UNKNOWN	FAM	NFQ-MGB	28.306										Average of Technical Replicates	Average of Biological Replicates
P10	EfCtrl Control Adductor	18S	UNKNOWN	VIC	NFQ-MGB	13.053		15.253	2.56088e-05						Biological Replicates
I17	E3KO Control Adductor	Emr1	UNKNOWN	FAM	NFQ-MGB	26.979				0.000103047	1.42591e-05	1.5982	0.22115		1	8.62486e-05	Actual	0.000103047
I17	E3KO Control Adductor	18S	UNKNOWN	VIC	NFQ-MGB	13.682		13.297	9.93583e-05						2	0.000169903	Normalized	1.5982
I18	E3KO Control Adductor	Emr1	UNKNOWN	FAM	NFQ-MGB	26.996									3	2.9716e-05	Actual SEM	2.05996e-05
I18	E3KO Control Adductor	18S	UNKNOWN	VIC	NFQ-MGB	13.257		13.739	7.3139e-05						4	0.000171557	Normalized SEM	0.319489
J17	E3KO Control Adductor	Emr1	UNKNOWN	FAM	NFQ-MGB	25.709									5	0.000125125
J17	E3KO Control Adductor	18S	UNKNOWN	VIC	NFQ-MGB	13.188		12.521	0.000170139						6	5.82909e-05
J18	E3KO Control Adductor	Emr1	UNKNOWN	FAM	NFQ-MGB	25.676									7	8.04868e-05
J18	E3KO Control Adductor	18S	UNKNOWN	VIC	NFQ-MGB	13.151		12.525	0.000169668
K17	E3KO Control Adductor	Emr1	UNKNOWN	FAM	NFQ-MGB	28.082
K17	E3KO Control Adductor	18S	UNKNOWN	VIC	NFQ-MGB	13.11		14.972	3.11156e-05
K18	E3KO Control Adductor	Emr1	UNKNOWN	FAM	NFQ-MGB	28.18
K18	E3KO Control Adductor	18S	UNKNOWN	VIC	NFQ-MGB	13.072		15.108	2.83164e-05
L17	E3KO Control Adductor	Emr1	UNKNOWN	FAM	NFQ-MGB	25.756
L17	E3KO Control Adductor	18S	UNKNOWN	VIC	NFQ-MGB	13.193		12.563	0.000165257
L18	E3KO Control Adductor	Emr1	UNKNOWN	FAM	NFQ-MGB	25.703
L18	E3KO Control Adductor	18S	UNKNOWN	VIC	NFQ-MGB	13.246		12.457	0.000177856
M17	E3KO Control Adductor	Emr1	UNKNOWN	FAM	NFQ-MGB	26.438
M17	E3KO Control Adductor	18S	UNKNOWN	VIC	NFQ-MGB	13.665		12.773	0.000142871
M18	E3KO Control Adductor	Emr1	UNKNOWN	FAM	NFQ-MGB	26.524
M18	E3KO Control Adductor	18S	UNKNOWN	VIC	NFQ-MGB	13.339		13.185	0.000107379
N17	E3KO Control Adductor	Emr1	UNKNOWN	FAM	NFQ-MGB	27.463
N17	E3KO Control Adductor	18S	UNKNOWN	VIC	NFQ-MGB	13.672		13.791	7.05498e-05
N18	E3KO Control Adductor	Emr1	UNKNOWN	FAM	NFQ-MGB	27.563
N18	E3KO Control Adductor	18S	UNKNOWN	VIC	NFQ-MGB	13.156		14.407	4.60321e-05
O17	E3KO Control Adductor	Emr1	UNKNOWN	FAM	NFQ-MGB	26.729
O17	E3KO Control Adductor	18S	UNKNOWN	VIC	NFQ-MGB	13.11		13.619	7.94827e-05
O18	E3KO Control Adductor	Emr1	UNKNOWN	FAM	NFQ-MGB	26.773										Average of Technical Replicates	Average of Biological Replicates
O18	E3KO Control Adductor	18S	UNKNOWN	VIC	NFQ-MGB	13.19		13.583	8.14909e-05						Biological Replicates
I3	ECtrl Ligated Adductor	18S	UNKNOWN	FAM	NFQ-MGB	13.055				0.000117372	1.38679e-05	1.82037	0.215083		1	0.000109504	Actual	0.000117372
I3	ECtrl Ligated Adductor	Emr1	UNKNOWN	VIC	NFQ-MGB	26.24		13.185	0.000107379						2	8.05944e-05	Normalized	1.82037
I4	ECtrl Ligated Adductor	18S	UNKNOWN	FAM	NFQ-MGB	13.028									3	6.8047e-05	Actual SEM	2.02682e-05
I4	ECtrl Ligated Adductor	Emr1	UNKNOWN	VIC	NFQ-MGB	26.157		13.129	0.000111629						4	6.884e-05	Normalized SEM	0.314348
J3	ECtrl Ligated Adductor	Emr1	UNKNOWN	FAM	NFQ-MGB	26.597									5	0.000112477		Ttest
J3	ECtrl Ligated Adductor	18S	UNKNOWN	VIC	NFQ-MGB	12.866		13.731	7.35457e-05						6	0.000200121	ECtrl. vs. EfCtrl	0.0338126
J4	ECtrl Ligated Adductor	Emr1	UNKNOWN	FAM	NFQ-MGB	26.632									7	0.00018202	ECtrl. vs. E3KO	0.0108704
J4	ECtrl Ligated Adductor	18S	UNKNOWN	VIC	NFQ-MGB	13.154		13.478	8.76431e-05								EfCtrl. vs. E3KO	0.0572508
K3	ECtrl Ligated Adductor	Emr1	UNKNOWN	FAM	NFQ-MGB	27.421
K3	ECtrl Ligated Adductor	18S	UNKNOWN	VIC	NFQ-MGB	13.468		13.953	6.30563e-05
K4	ECtrl Ligated Adductor	Emr1	UNKNOWN	FAM	NFQ-MGB	27.38
K4	ECtrl Ligated Adductor	18S	UNKNOWN	VIC	NFQ-MGB	13.639		13.741	7.30377e-05
L3	ECtrl Ligated Adductor	Emr1	UNKNOWN	FAM	NFQ-MGB	26.799
L3	ECtrl Ligated Adductor	18S	UNKNOWN	VIC	NFQ-MGB	12.99		13.809	6.9675e-05
L4	ECtrl Ligated Adductor	Emr1	UNKNOWN	FAM	NFQ-MGB	26.819
L4	ECtrl Ligated Adductor	18S	UNKNOWN	VIC	NFQ-MGB	12.975		13.844	6.8005e-05
M3	ECtrl Ligated Adductor	Emr1	UNKNOWN	FAM	NFQ-MGB	26.221
M3	ECtrl Ligated Adductor	18S	UNKNOWN	VIC	NFQ-MGB	13.068		13.153	0.000109787
M4	ECtrl Ligated Adductor	Emr1	UNKNOWN	FAM	NFQ-MGB	26.136
M4	ECtrl Ligated Adductor	18S	UNKNOWN	VIC	NFQ-MGB	13.052		13.084	0.000115166
N3	ECtrl Ligated Adductor	Emr1	UNKNOWN	FAM	NFQ-MGB	25.445
N3	ECtrl Ligated Adductor	18S	UNKNOWN	VIC	NFQ-MGB	13.235		12.21	0.000211069
N4	ECtrl Ligated Adductor	Emr1	UNKNOWN	FAM	NFQ-MGB	25.356
N4	ECtrl Ligated Adductor	18S	UNKNOWN	VIC	NFQ-MGB	12.988		12.368	0.000189174
O3	ECtrl Ligated Adductor	Emr1	UNKNOWN	FAM	NFQ-MGB	25.642
O3	ECtrl Ligated Adductor	18S	UNKNOWN	VIC	NFQ-MGB	13.268		12.374	0.000188389
O4	ECtrl Ligated Adductor	Emr1	UNKNOWN	FAM	NFQ-MGB	25.602										Average of Technical Replicates	Average of Biological Replicates
O4	ECtrl Ligated Adductor	18S	UNKNOWN	VIC	NFQ-MGB	13.127		12.475	0.000175651						Biological Replicates
I11	EfCtrl Ligated Adductor	Emr1	UNKNOWN	FAM	NFQ-MGB	24.903				0.000205492	2.08732e-05	3.18706	0.323731		1	0.000307031	Actual	0.000205492
I11	EfCtrl Ligated Adductor	18S	UNKNOWN	VIC	NFQ-MGB	13.189		11.714	0.00029767						2	0.000201463	Normalized	3.18706
I12	EfCtrl Ligated Adductor	Emr1	UNKNOWN	FAM	NFQ-MGB	24.904									3	0.000311751	Actual SEM	2.98003e-05
I12	EfCtrl Ligated Adductor	18S	UNKNOWN	VIC	NFQ-MGB	13.278		11.626	0.000316392						4	0.000233344	Normalized SEM	0.462186
J11	EfCtrl Ligated Adductor	Emr1	UNKNOWN	FAM	NFQ-MGB	25.486									5	0.000247431
J11	EfCtrl Ligated Adductor	18S	UNKNOWN	VIC	NFQ-MGB	13.179		12.307	0.000197344						6	9.46085e-05
J12	EfCtrl Ligated Adductor	Emr1	UNKNOWN	FAM	NFQ-MGB	25.502									7	0.000129259
J12	EfCtrl Ligated Adductor	18S	UNKNOWN	VIC	NFQ-MGB	13.254		12.248	0.000205582						8	0.000119047
K11	EfCtrl Ligated Adductor	Emr1	UNKNOWN	FAM	NFQ-MGB	25.129
K11	EfCtrl Ligated Adductor	18S	UNKNOWN	VIC	NFQ-MGB	13.325		11.804	0.000279667
K12	EfCtrl Ligated Adductor	Emr1	UNKNOWN	FAM	NFQ-MGB	25.207
K12	EfCtrl Ligated Adductor	18S	UNKNOWN	VIC	NFQ-MGB	13.701		11.506	0.000343834
L11	EfCtrl Ligated Adductor	Emr1	UNKNOWN	FAM	NFQ-MGB	25.602
L11	EfCtrl Ligated Adductor	18S	UNKNOWN	VIC	NFQ-MGB	13.296		12.306	0.000197481
L12	EfCtrl Ligated Adductor	Emr1	UNKNOWN	FAM	NFQ-MGB	25.626
L12	EfCtrl Ligated Adductor	18S	UNKNOWN	VIC	NFQ-MGB	13.767		11.859	0.000269206
M11	EfCtrl Ligated Adductor	Emr1	UNKNOWN	FAM	NFQ-MGB	25.635
M11	EfCtrl Ligated Adductor	18S	UNKNOWN	VIC	NFQ-MGB	13.684		11.951	0.000252575
M12	EfCtrl Ligated Adductor	Emr1	UNKNOWN	FAM	NFQ-MGB	25.625
M12	EfCtrl Ligated Adductor	18S	UNKNOWN	VIC	NFQ-MGB	13.614		12.011	0.000242286
N11	EfCtrl Ligated Adductor	Emr1	UNKNOWN	FAM	NFQ-MGB	26.572
N11	EfCtrl Ligated Adductor	18S	UNKNOWN	VIC	NFQ-MGB	13.12		13.452	8.92369e-05
N12	EfCtrl Ligated Adductor	Emr1	UNKNOWN	FAM	NFQ-MGB	26.56
N12	EfCtrl Ligated Adductor	18S	UNKNOWN	VIC	NFQ-MGB	13.272		13.288	9.99801e-05
O11	EfCtrl Ligated Adductor	Emr1	UNKNOWN	FAM	NFQ-MGB	25.976
O11	EfCtrl Ligated Adductor	18S	UNKNOWN	VIC	NFQ-MGB	13.046		12.93	0.000128139
O12	EfCtrl Ligated Adductor	Emr1	UNKNOWN	FAM	NFQ-MGB	26.036
O12	EfCtrl Ligated Adductor	18S	UNKNOWN	VIC	NFQ-MGB	13.131		12.905	0.000130379
P11	EfCtrl Ligated Adductor	Emr1	UNKNOWN	FAM	NFQ-MGB	26.452
P11	EfCtrl Ligated Adductor	18S	UNKNOWN	VIC	NFQ-MGB	13.307		13.145	0.000110398
P12	EfCtrl Ligated Adductor	Emr1	UNKNOWN	FAM	NFQ-MGB	26.466										Average of Technical Replicates	Average of Biological Replicates
P12	EfCtrl Ligated Adductor	18S	UNKNOWN	VIC	NFQ-MGB	13.531		12.935	0.000127696						Biological Replicates
I19	E3KO Ligated Adductor	Emr1	UNKNOWN	FAM	NFQ-MGB	24.008				0.000388354	5.97435e-05	6.02315	0.926588		1	0.000484874	Actual	0.000388354
I19	E3KO Ligated Adductor	18S	UNKNOWN	VIC	NFQ-MGB	13.06		10.948	0.000506202						2	9.77418e-05	Normalized	6.02315
I20	E3KO Ligated Adductor	Emr1	UNKNOWN	FAM	NFQ-MGB	24.111									3	0.000537913	Actual SEM	8.77273e-05
I20	E3KO Ligated Adductor	18S	UNKNOWN	VIC	NFQ-MGB	13.036		11.075	0.000463546						4	0.000348331	Normalized SEM	1.3606
J19	E3KO Ligated Adductor	Emr1	UNKNOWN	FAM	NFQ-MGB	26.781									5	9.89856e-05
J19	E3KO Ligated Adductor	18S	UNKNOWN	VIC	NFQ-MGB	13.302		13.479	8.75824e-05						6	0.000414299
J20	E3KO Ligated Adductor	Emr1	UNKNOWN	FAM	NFQ-MGB	26.725									7	0.00073633
J20	E3KO Ligated Adductor	18S	UNKNOWN	VIC	NFQ-MGB	13.547		13.178	0.000107901
K19	E3KO Ligated Adductor	Emr1	UNKNOWN	FAM	NFQ-MGB	24.517
K19	E3KO Ligated Adductor	18S	UNKNOWN	VIC	NFQ-MGB	13.635		10.882	0.000529897
K20	E3KO Ligated Adductor	Emr1	UNKNOWN	FAM	NFQ-MGB	24.538
K20	E3KO Ligated Adductor	18S	UNKNOWN	VIC	NFQ-MGB	13.699		10.839	0.000545929
L19	E3KO Ligated Adductor	Emr1	UNKNOWN	FAM	NFQ-MGB	24.798
L19	E3KO Ligated Adductor	18S	UNKNOWN	VIC	NFQ-MGB	13.238		11.56	0.000331202
L20	E3KO Ligated Adductor	Emr1	UNKNOWN	FAM	NFQ-MGB	24.821
L20	E3KO Ligated Adductor	18S	UNKNOWN	VIC	NFQ-MGB	13.403		11.418	0.00036546
M19	E3KO Ligated Adductor	Emr1	UNKNOWN	FAM	NFQ-MGB	26.463
M19	E3KO Ligated Adductor	18S	UNKNOWN	VIC	NFQ-MGB	13.271		13.192	0.000106859
M20	E3KO Ligated Adductor	Emr1	UNKNOWN	FAM	NFQ-MGB	26.624
M20	E3KO Ligated Adductor	18S	UNKNOWN	VIC	NFQ-MGB	13.202		13.422	9.11119e-05
N19	E3KO Ligated Adductor	Emr1	UNKNOWN	FAM	NFQ-MGB	24.53
N19	E3KO Ligated Adductor	18S	UNKNOWN	VIC	NFQ-MGB	13.329		11.201	0.000424779
N20	E3KO Ligated Adductor	Emr1	UNKNOWN	FAM	NFQ-MGB	24.558
N20	E3KO Ligated Adductor	18S	UNKNOWN	VIC	NFQ-MGB	13.284		11.274	0.00040382
O19	E3KO Ligated Adductor	Emr1	UNKNOWN	FAM	NFQ-MGB	23.641
O19	E3KO Ligated Adductor	18S	UNKNOWN	VIC	NFQ-MGB	13.19		10.451	0.00071439
O20	E3KO Ligated Adductor	Emr1	UNKNOWN	FAM	NFQ-MGB	23.697										Average of Technical Replicates	Average of Biological Replicates
O20	E3KO Ligated Adductor	18S	UNKNOWN	VIC	NFQ-MGB	13.332		10.365	0.00075827						Biological Replicates
I5	ECtrl Control Calf	18S	UNKNOWN	FAM	NFQ-MGB	13.247				3.02743e-05	4.54957e-06	1	0.150278		1	3.08274e-05	Actual	3.02743e-05
I5	ECtrl Control Calf	Emr1	UNKNOWN	VIC	NFQ-MGB	28.44		15.193	2.66963e-05						2	1.59793e-05	Normalized	1
I6	ECtrl Control Calf	18S	UNKNOWN	FAM	NFQ-MGB	13.639									3	1.14176e-05	Actual SEM	6.64536e-06
I6	ECtrl Control Calf	Emr1	UNKNOWN	VIC	NFQ-MGB	28.443		14.804	3.49584e-05						4	1.99409e-05	Normalized SEM	0.219505
J5	ECtrl Control Calf	Emr1	UNKNOWN	FAM	NFQ-MGB	28.911									5	2.96754e-05		Ttest
J5	ECtrl Control Calf	18S	UNKNOWN	VIC	NFQ-MGB	13.061		15.85	1.69307e-05						6	6.29925e-05	ECtrl. vs. EfCtrl	0.635375
J6	ECtrl Control Calf	Emr1	UNKNOWN	FAM	NFQ-MGB	29.103									7	4.10868e-05	ECtrl. vs. E3KO	0.104482
J6	ECtrl Control Calf	18S	UNKNOWN	VIC	NFQ-MGB	13.081		16.022	1.50279e-05								EfCtrl. vs. E3KO	0.0968135
K5	ECtrl Control Calf	Emr1	UNKNOWN	FAM	NFQ-MGB	29.35
K5	ECtrl Control Calf	18S	UNKNOWN	VIC	NFQ-MGB	12.842		16.508	1.07299e-05
K6	ECtrl Control Calf	Emr1	UNKNOWN	FAM	NFQ-MGB	29.457
K6	ECtrl Control Calf	18S	UNKNOWN	VIC	NFQ-MGB	13.123		16.334	1.21053e-05
L5	ECtrl Control Calf	Emr1	UNKNOWN	FAM	NFQ-MGB	28.677
L5	ECtrl Control Calf	18S	UNKNOWN	VIC	NFQ-MGB	13.147		15.53	2.11351e-05
L6	ECtrl Control Calf	Emr1	UNKNOWN	FAM	NFQ-MGB	28.791
L6	ECtrl Control Calf	18S	UNKNOWN	VIC	NFQ-MGB	13.088		15.703	1.87467e-05
M5	ECtrl Control Calf	Emr1	UNKNOWN	FAM	NFQ-MGB	28.307
M5	ECtrl Control Calf	18S	UNKNOWN	VIC	NFQ-MGB	13.116		15.191	2.67334e-05
M6	ECtrl Control Calf	Emr1	UNKNOWN	FAM	NFQ-MGB	28.508
M6	ECtrl Control Calf	18S	UNKNOWN	VIC	NFQ-MGB	13.604		14.904	3.26174e-05
N5	ECtrl Control Calf	Emr1	UNKNOWN	FAM	NFQ-MGB	27.188
N5	ECtrl Control Calf	18S	UNKNOWN	VIC	NFQ-MGB	13.244		13.944	6.34509e-05
N6	ECtrl Control Calf	Emr1	UNKNOWN	FAM	NFQ-MGB	27.168
N6	ECtrl Control Calf	18S	UNKNOWN	VIC	NFQ-MGB	13.203		13.965	6.2534e-05
O5	ECtrl Control Calf	Emr1	UNKNOWN	FAM	NFQ-MGB	27.677
O5	ECtrl Control Calf	18S	UNKNOWN	VIC	NFQ-MGB	13.096		14.581	4.0802e-05
O6	ECtrl Control Calf	Emr1	UNKNOWN	FAM	NFQ-MGB	27.647										Average of Technical Replicates	Average of Biological Replicates
O6	ECtrl Control Calf	18S	UNKNOWN	VIC	NFQ-MGB	13.086		14.561	4.13716e-05						Biological Replicates
I13	EfCtrl Control Calf	Emr1	UNKNOWN	FAM	NFQ-MGB	28.407				3.37085e-05	2.28043e-06	1.11344	0.0753257		1	2.51436e-05	Actual	3.37085e-05
I13	EfCtrl Control Calf	18S	UNKNOWN	VIC	NFQ-MGB	13.288		15.119	2.81014e-05						2	2.90736e-05	Normalized	1.11344
I14	EfCtrl Control Calf	Emr1	UNKNOWN	FAM	NFQ-MGB	28.54									3	3.83667e-05	Actual SEM	3.19946e-06
I14	EfCtrl Control Calf	18S	UNKNOWN	VIC	NFQ-MGB	13.08		15.46	2.21858e-05						4	3.90189e-05	Normalized SEM	0.0949156
J13	EfCtrl Control Calf	Emr1	UNKNOWN	FAM	NFQ-MGB	28.273									5	2.90194e-05
J13	EfCtrl Control Calf	18S	UNKNOWN	VIC	NFQ-MGB	13.319		14.954	3.15063e-05						6	2.18585e-05
J14	EfCtrl Control Calf	Emr1	UNKNOWN	FAM	NFQ-MGB	28.364									7	4.95378e-05
J14	EfCtrl Control Calf	18S	UNKNOWN	VIC	NFQ-MGB	13.168		15.196	2.66409e-05						8	3.76494e-05
K13	EfCtrl Control Calf	Emr1	UNKNOWN	FAM	NFQ-MGB	28.066
K13	EfCtrl Control Calf	18S	UNKNOWN	VIC	NFQ-MGB	13.256		14.81	3.48133e-05
K14	EfCtrl Control Calf	Emr1	UNKNOWN	FAM	NFQ-MGB	28.183
K14	EfCtrl Control Calf	18S	UNKNOWN	VIC	NFQ-MGB	13.641		14.542	4.192e-05
L13	EfCtrl Control Calf	Emr1	UNKNOWN	FAM	NFQ-MGB	28.217
L13	EfCtrl Control Calf	18S	UNKNOWN	VIC	NFQ-MGB	13.562		14.655	3.8762e-05
L14	EfCtrl Control Calf	Emr1	UNKNOWN	FAM	NFQ-MGB	27.991
L14	EfCtrl Control Calf	18S	UNKNOWN	VIC	NFQ-MGB	13.355		14.636	3.92758e-05
M13	EfCtrl Control Calf	Emr1	UNKNOWN	FAM	NFQ-MGB	28.263
M13	EfCtrl Control Calf	18S	UNKNOWN	VIC	NFQ-MGB	13.223		15.04	2.96831e-05
M14	EfCtrl Control Calf	Emr1	UNKNOWN	FAM	NFQ-MGB	28.229
M14	EfCtrl Control Calf	18S	UNKNOWN	VIC	NFQ-MGB	13.123		15.106	2.83557e-05
N13	EfCtrl Control Calf	Emr1	UNKNOWN	FAM	NFQ-MGB	28.583
N13	EfCtrl Control Calf	18S	UNKNOWN	VIC	NFQ-MGB	13.114		15.469	2.20479e-05
N14	EfCtrl Control Calf	Emr1	UNKNOWN	FAM	NFQ-MGB	28.714
N14	EfCtrl Control Calf	18S	UNKNOWN	VIC	NFQ-MGB	13.22		15.494	2.16691e-05
O13	EfCtrl Control Calf	Emr1	UNKNOWN	FAM	NFQ-MGB	27.694
O13	EfCtrl Control Calf	18S	UNKNOWN	VIC	NFQ-MGB	13.283		14.411	4.59046e-05
O14	EfCtrl Control Calf	Emr1	UNKNOWN	FAM	NFQ-MGB	27.83
O14	EfCtrl Control Calf	18S	UNKNOWN	VIC	NFQ-MGB	13.631		14.199	5.3171e-05
P13	EfCtrl Control Calf	Emr1	UNKNOWN	FAM	NFQ-MGB	28.056
P13	EfCtrl Control Calf	18S	UNKNOWN	VIC	NFQ-MGB	13.234		14.822	3.4525e-05
P14	EfCtrl Control Calf	Emr1	UNKNOWN	FAM	NFQ-MGB	27.897										Average of Technical Replicates	Average of Biological Replicates
P14	EfCtrl Control Calf	18S	UNKNOWN	VIC	NFQ-MGB	13.315		14.582	4.07738e-05						Biological Replicates
I21	E3KO Control Calf	Emr1	UNKNOWN	FAM	NFQ-MGB	28.716				5.01346e-05	6.31556e-06	1.65601	0.208611		1	4.40713e-05	Actual	5.01346e-05
I21	E3KO Control Calf	18S	UNKNOWN	VIC	NFQ-MGB	14.125		14.591	4.05202e-05						2	3.93035e-05	Normalized	1.65601
I22	E3KO Control Calf	Emr1	UNKNOWN	FAM	NFQ-MGB	28.64									3	4.0701e-05	Actual SEM	9.14851e-06
I22	E3KO Control Calf	18S	UNKNOWN	VIC	NFQ-MGB	14.282		14.358	4.76224e-05						4	9.32495e-05	Normalized SEM	0.302188
J21	E3KO Control Calf	Emr1	UNKNOWN	FAM	NFQ-MGB	28.004									5	2.47355e-05
J21	E3KO Control Calf	18S	UNKNOWN	VIC	NFQ-MGB	13.362		14.642	3.91128e-05						6	7.35592e-05
J22	E3KO Control Calf	Emr1	UNKNOWN	FAM	NFQ-MGB	27.974									7	3.53222e-05
J22	E3KO Control Calf	18S	UNKNOWN	VIC	NFQ-MGB	13.346		14.628	3.94942e-05
K21	E3KO Control Calf	Emr1	UNKNOWN	FAM	NFQ-MGB	28.285
K21	E3KO Control Calf	18S	UNKNOWN	VIC	NFQ-MGB	13.735		14.55	4.16882e-05
K22	E3KO Control Calf	Emr1	UNKNOWN	FAM	NFQ-MGB	28.391
K22	E3KO Control Calf	18S	UNKNOWN	VIC	NFQ-MGB	13.771		14.62	3.97138e-05
L21	E3KO Control Calf	Emr1	UNKNOWN	FAM	NFQ-MGB	27.35
L21	E3KO Control Calf	18S	UNKNOWN	VIC	NFQ-MGB	13.908		13.442	8.98576e-05
L22	E3KO Control Calf	Emr1	UNKNOWN	FAM	NFQ-MGB	27.334
L22	E3KO Control Calf	18S	UNKNOWN	VIC	NFQ-MGB	13.997		13.337	9.66413e-05
M21	E3KO Control Calf	Emr1	UNKNOWN	FAM	NFQ-MGB	28.74
M21	E3KO Control Calf	18S	UNKNOWN	VIC	NFQ-MGB	13.647		15.093	2.86124e-05
M22	E3KO Control Calf	Emr1	UNKNOWN	FAM	NFQ-MGB	28.876
M22	E3KO Control Calf	18S	UNKNOWN	VIC	NFQ-MGB	13.327		15.549	2.08586e-05
N21	E3KO Control Calf	Emr1	UNKNOWN	FAM	NFQ-MGB	27.234
N21	E3KO Control Calf	18S	UNKNOWN	VIC	NFQ-MGB	13.388		13.846	6.79108e-05
N22	E3KO Control Calf	Emr1	UNKNOWN	FAM	NFQ-MGB	27.361
N22	E3KO Control Calf	18S	UNKNOWN	VIC	NFQ-MGB	13.737		13.624	7.92077e-05
O21	E3KO Control Calf	Emr1	UNKNOWN	FAM	NFQ-MGB	28.191
O21	E3KO Control Calf	18S	UNKNOWN	VIC	NFQ-MGB	13.646		14.545	4.1833e-05
O22	E3KO Control Calf	Emr1	UNKNOWN	FAM	NFQ-MGB	28.312										Average of Technical Replicates	Average of Biological Replicates
O22	E3KO Control Calf	18S	UNKNOWN	VIC	NFQ-MGB	13.229		15.083	2.88114e-05						Biological Replicates
I7	ECtrl Ligated Calf	18S	UNKNOWN	FAM	NFQ-MGB	13.32				0.000377516	7.63073e-05	12.4699	2.52053		1	0.000151992	Actual	0.000377516
I7	ECtrl Ligated Calf	Emr1	UNKNOWN	VIC	NFQ-MGB	25.957		12.637	0.000156994						2	0.000270645	Normalized	12.4699
I8	ECtrl Ligated Calf	18S	UNKNOWN	FAM	NFQ-MGB	13.206									3	8.09137e-05	Actual SEM	0.000112003
I8	ECtrl Ligated Calf	Emr1	UNKNOWN	VIC	NFQ-MGB	25.938		12.732	0.000146989						4	0.000503812	Normalized SEM	3.69962
J7	ECtrl Ligated Calf	Emr1	UNKNOWN	FAM	NFQ-MGB	25.017									5	0.000119358		Ttest
J7	ECtrl Ligated Calf	18S	UNKNOWN	VIC	NFQ-MGB	13.142		11.875	0.000266237						6	0.000805779	ECtrl. vs. EfCtrl	0.725212
J8	ECtrl Ligated Calf	Emr1	UNKNOWN	FAM	NFQ-MGB	24.992									7	0.000710109	ECtrl. vs. E3KO	0.716147
J8	ECtrl Ligated Calf	18S	UNKNOWN	VIC	NFQ-MGB	13.164		11.828	0.000275053								EfCtrl. vs. E3KO	0.986411
K7	ECtrl Ligated Calf	Emr1	UNKNOWN	FAM	NFQ-MGB	26.657
K7	ECtrl Ligated Calf	18S	UNKNOWN	VIC	NFQ-MGB	12.972		13.685	7.59285e-05
K8	ECtrl Ligated Calf	Emr1	UNKNOWN	FAM	NFQ-MGB	26.601
K8	ECtrl Ligated Calf	18S	UNKNOWN	VIC	NFQ-MGB	13.094		13.507	8.5899e-05
L7	ECtrl Ligated Calf	Emr1	UNKNOWN	FAM	NFQ-MGB	23.987
L7	ECtrl Ligated Calf	18S	UNKNOWN	VIC	NFQ-MGB	13.1		10.887	0.000528064
L8	ECtrl Ligated Calf	Emr1	UNKNOWN	FAM	NFQ-MGB	24.045
L8	ECtrl Ligated Calf	18S	UNKNOWN	VIC	NFQ-MGB	13.019		11.026	0.00047956
M7	ECtrl Ligated Calf	Emr1	UNKNOWN	FAM	NFQ-MGB	26.019
M7	ECtrl Ligated Calf	18S	UNKNOWN	VIC	NFQ-MGB	12.854		13.165	0.000108878
M8	ECtrl Ligated Calf	Emr1	UNKNOWN	FAM	NFQ-MGB	26.037
M8	ECtrl Ligated Calf	18S	UNKNOWN	VIC	NFQ-MGB	13.126		12.911	0.000129838
N7	ECtrl Ligated Calf	Emr1	UNKNOWN	FAM	NFQ-MGB	23.097
N7	ECtrl Ligated Calf	18S	UNKNOWN	VIC	NFQ-MGB	12.863		10.234	0.000830346
N8	ECtrl Ligated Calf	Emr1	UNKNOWN	FAM	NFQ-MGB	23.136
N8	ECtrl Ligated Calf	18S	UNKNOWN	VIC	NFQ-MGB	12.814		10.322	0.000781211
O7	ECtrl Ligated Calf	Emr1	UNKNOWN	FAM	NFQ-MGB	23.606
O7	ECtrl Ligated Calf	18S	UNKNOWN	VIC	NFQ-MGB	13.062		10.544	0.000669791
O8	ECtrl Ligated Calf	Emr1	UNKNOWN	FAM	NFQ-MGB	23.601										Average of Technical Replicates	Average of Biological Replicates
O8	ECtrl Ligated Calf	18S	UNKNOWN	VIC	NFQ-MGB	13.221		10.38	0.000750427						Biological Replicates
I15	EfCtrl Ligated Calf	Emr1	UNKNOWN	FAM	NFQ-MGB	23.297				0.000437759	8.41175e-05	14.4598	2.77851		1	0.00110413	Actual	0.000437759
I15	EfCtrl Ligated Calf	18S	UNKNOWN	VIC	NFQ-MGB	13.335		9.962	0.00100263						2	0.000692471	Normalized	14.4598
I16	EfCtrl Ligated Calf	Emr1	UNKNOWN	FAM	NFQ-MGB	23.348									3	0.000375095	Actual SEM	0.000122351
I16	EfCtrl Ligated Calf	18S	UNKNOWN	VIC	NFQ-MGB	13.652		9.696	0.00120563						4	0.000609536	Normalized SEM	4.04143
J15	EfCtrl Ligated Calf	Emr1	UNKNOWN	FAM	NFQ-MGB	24.765									5	0.00013125
J15	EfCtrl Ligated Calf	18S	UNKNOWN	VIC	NFQ-MGB	14.28		10.485	0.000697751						6	9.98483e-05
J16	EfCtrl Ligated Calf	Emr1	UNKNOWN	FAM	NFQ-MGB	24.841									7	0.000326762
J16	EfCtrl Ligated Calf	18S	UNKNOWN	VIC	NFQ-MGB	14.334		10.507	0.000687192						8	0.000162985
K15	EfCtrl Ligated Calf	Emr1	UNKNOWN	FAM	NFQ-MGB	24.594
K15	EfCtrl Ligated Calf	18S	UNKNOWN	VIC	NFQ-MGB	13.225		11.369	0.000378086
K16	EfCtrl Ligated Calf	Emr1	UNKNOWN	FAM	NFQ-MGB	24.655
K16	EfCtrl Ligated Calf	18S	UNKNOWN	VIC	NFQ-MGB	13.263		11.392	0.000372105
L15	EfCtrl Ligated Calf	Emr1	UNKNOWN	FAM	NFQ-MGB	23.883
L15	EfCtrl Ligated Calf	18S	UNKNOWN	VIC	NFQ-MGB	13.202		10.681	0.000609114
L16	EfCtrl Ligated Calf	Emr1	UNKNOWN	FAM	NFQ-MGB	23.898
L16	EfCtrl Ligated Calf	18S	UNKNOWN	VIC	NFQ-MGB	13.219		10.679	0.000609959
M15	EfCtrl Ligated Calf	Emr1	UNKNOWN	FAM	NFQ-MGB	25.977
M15	EfCtrl Ligated Calf	18S	UNKNOWN	VIC	NFQ-MGB	13.064		12.913	0.000129658
M16	EfCtrl Ligated Calf	Emr1	UNKNOWN	FAM	NFQ-MGB	26.032
M16	EfCtrl Ligated Calf	18S	UNKNOWN	VIC	NFQ-MGB	13.154		12.878	0.000132842
N15	EfCtrl Ligated Calf	Emr1	UNKNOWN	FAM	NFQ-MGB	26.623
N15	EfCtrl Ligated Calf	18S	UNKNOWN	VIC	NFQ-MGB	13.291		13.332	9.69769e-05
N16	EfCtrl Ligated Calf	Emr1	UNKNOWN	FAM	NFQ-MGB	26.545
N16	EfCtrl Ligated Calf	18S	UNKNOWN	VIC	NFQ-MGB	13.296		13.249	0.00010272
O15	EfCtrl Ligated Calf	Emr1	UNKNOWN	FAM	NFQ-MGB	24.759
O15	EfCtrl Ligated Calf	18S	UNKNOWN	VIC	NFQ-MGB	13.233		11.526	0.0003391
O16	EfCtrl Ligated Calf	Emr1	UNKNOWN	FAM	NFQ-MGB	24.785
O16	EfCtrl Ligated Calf	18S	UNKNOWN	VIC	NFQ-MGB	13.15		11.635	0.000314424
P15	EfCtrl Ligated Calf	Emr1	UNKNOWN	FAM	NFQ-MGB	25.398
P15	EfCtrl Ligated Calf	18S	UNKNOWN	VIC	NFQ-MGB	12.955		12.443	0.000179591
P16	EfCtrl Ligated Calf	Emr1	UNKNOWN	FAM	NFQ-MGB	25.434										Average of Technical Replicates	Average of Biological Replicates
P16	EfCtrl Ligated Calf	18S	UNKNOWN	VIC	NFQ-MGB	12.696		12.738	0.000146379						Biological Replicates
I23	E3KO Ligated Calf	Emr1	UNKNOWN	FAM	NFQ-MGB	24.725				0.000434908	7.27092e-05	14.3656	2.40168		1	0.0003924	Actual	0.000434908
I23	E3KO Ligated Calf	18S	UNKNOWN	VIC	NFQ-MGB	13.451		11.274	0.00040382						2	5.14646e-05	Normalized	14.3656
I24	E3KO Ligated Calf	Emr1	UNKNOWN	FAM	NFQ-MGB	24.809									3	0.000796202	Actual SEM	0.000105909
I24	E3KO Ligated Calf	18S	UNKNOWN	VIC	NFQ-MGB	13.451		11.358	0.000380979						4	0.000449646	Normalized SEM	3.49831
J23	E3KO Ligated Calf	Emr1	UNKNOWN	FAM	NFQ-MGB	27.828									5	0.000132548
J23	E3KO Ligated Calf	18S	UNKNOWN	VIC	NFQ-MGB	13.445		14.383	4.68043e-05						6	0.00047313
J24	E3KO Ligated Calf	Emr1	UNKNOWN	FAM	NFQ-MGB	27.863									7	0.000748963
J24	E3KO Ligated Calf	18S	UNKNOWN	VIC	NFQ-MGB	13.742		14.121	5.61248e-05
K23	E3KO Ligated Calf	Emr1	UNKNOWN	FAM	NFQ-MGB	23.776
K23	E3KO Ligated Calf	18S	UNKNOWN	VIC	NFQ-MGB	13.364		10.412	0.000733966
K24	E3KO Ligated Calf	Emr1	UNKNOWN	FAM	NFQ-MGB	23.684
K24	E3KO Ligated Calf	18S	UNKNOWN	VIC	NFQ-MGB	13.498		10.186	0.000858437
L23	E3KO Ligated Calf	Emr1	UNKNOWN	FAM	NFQ-MGB	29.823
L23	E3KO Ligated Calf	18S	UNKNOWN	VIC	NFQ-MGB	18.872		10.951	0.00050515
L24	E3KO Ligated Calf	Emr1	UNKNOWN	FAM	NFQ-MGB	30.058
L24	E3KO Ligated Calf	18S	UNKNOWN	VIC	NFQ-MGB	18.749		11.309	0.000394141
M23	E3KO Ligated Calf	Emr1	UNKNOWN	FAM	NFQ-MGB	26.457
M23	E3KO Ligated Calf	18S	UNKNOWN	VIC	NFQ-MGB	13.683		12.774	0.000142772
M24	E3KO Ligated Calf	Emr1	UNKNOWN	FAM	NFQ-MGB	26.572
M24	E3KO Ligated Calf	18S	UNKNOWN	VIC	NFQ-MGB	13.575		12.997	0.000122324
N23	E3KO Ligated Calf	Emr1	UNKNOWN	FAM	NFQ-MGB	24.634
N23	E3KO Ligated Calf	18S	UNKNOWN	VIC	NFQ-MGB	13.737		10.897	0.000524416
N24	E3KO Ligated Calf	Emr1	UNKNOWN	FAM	NFQ-MGB	24.708
N24	E3KO Ligated Calf	18S	UNKNOWN	VIC	NFQ-MGB	13.497		11.211	0.000421845
O23	E3KO Ligated Calf	Emr1	UNKNOWN	FAM	NFQ-MGB	23.78
O23	E3KO Ligated Calf	18S	UNKNOWN	VIC	NFQ-MGB	13.42		10.36	0.000760903
O24	E3KO Ligated Calf	Emr1	UNKNOWN	FAM	NFQ-MGB	23.857
O24	E3KO Ligated Calf	18S	UNKNOWN	VIC	NFQ-MGB	13.451		10.406	0.000737024
