# Supplementary material for: Suppression of ischemia in arterial occlusive disease by JNK-promoted native collateral artery development
Source: eLife. 2016 Aug 9;5:e18414. doi: 10.7554/eLife.18414 (PMC4999312; doi:10.7554/eLife.18414)
Supplement: Figure 6—figure supplement 2—source data 1. — This file contains raw source data used to make the graphs presented in Figure 6—figure supplement 2. DOI: http://dx.doi.org/10.7554/eLife.18414.034 [file elife-18414-fig6-figsupp2-data1.xlsx]

## Sheet: Panel L
		EfCtrl		E2KO
		P6 Retinal Area		P6 Retinal Area				Percent Vascularized Retina
	Retina	Total	Vascularized	Total	Vascularized			EfCtrl	E2KO
	1	1.20909e+07	6.10361e+06	1.21993e+07	4.59828e+06			50.4811	37.6931
	2	1.31503e+07	6.41198e+06	1.15228e+07	4.04416e+06			48.7592	35.0969
	3	1.21546e+07	5.26616e+06	1.07068e+07	3.28418e+06			43.3264	30.6737
	4	1.10438e+07	4.56016e+06	1.12863e+07	4.03107e+06			41.2916	35.7164
	5	1.16862e+07	5.36579e+06	10197901	4679268			45.9157	45.8846
	6	9433669	5970420	8037512	2401144			63.2884	29.8742
	7	9991065	5965717	8041162	1963342			59.7105	24.4161
	8	7835488	3671977					46.8634
	9	10139105	6824393					67.3076
								EfCtrl	E2KO
								51.8827	34.1936
								SEM	SEM
								3.0894	2.57602
								Ttest
								0.000846936

## Sheet: Panel M
							Percent of ROI Occupied by Vessels
	P6 Retina	Percent of ROI Occupied by Vessels		P6 Retina			Individual Retina Averages
	Quadrants	EfCtrl	E2KO	Quadrants		P6 Retinas	EfCtrl	E2KO	P6 Retinas
	1-1	45.325	50.858	1-1		1	42.3485	53.8517	1
	1-2	39.372	58.909	1-2		2	45.7118	61.1188	2
	2-1	44.764	51.788	1-3		3	47.6972	60.5247	3
	2-2	49.57	66.964	2-1		4	52.6335	61.8495	4
	2-3	39.646	62.466	2-2		5	41.9687	62.8412	5
	2-4	48.867	45.973	2-3		6	45.1173	68.4027	6
	3-1	47.272	69.072	2-4		7	46.0455	64.3715	7
	3-2	45.879	65.453	3-1		8	50.8955	69.687	8
	3-3	45.507	50.132	3-2
	3-4	52.131	65.989	3-3
	4-1	49.53	77.743	4-1
	4-2	50.604	71.777	4-2
	4-3	57.689	45.814	4-3			Percent of ROI Occupied by Vessels
	4-4	52.711	52.064	4-4			Overall Retina Averages
	5-1	43.147	47.229	5-1			EfCtrl	E2KO
	5-2	38.599	82.957	5-2			46.5522	62.8309
	5-3	44.16	63.775	5-3			SEM	SEM
	6-1	43.626	57.404	5-4			1.32867	1.74369
	6-2	50.978	64.801	6-1			Ttest
	6-3	43.691	58.957	6-2			3.22372e-06
	6-4	42.174	81.049	6-3
	7-1	50.934	68.804	6-4
	7-2	41.096	75.014	7-1
	7-3	45.388	53.729	7-2
	7-4	46.764	82.467	8-1
	8-1	53.164	56.484	8-2
	8-2	52.444	56.08	8-3
	8-3	48.335	83.717	8-4
	8-4	49.639

## Sheet: Panel N
															Tips per Angiogenic Front Length
		EfCtrl			E2KO				Tips per Angiogenic Front Length						Individual Retina Averages
		Retina 20x Images	Angiogenic Front Length	Tips	Angiogenic Front Length	Tips	Retina 20x Images		Retina 20x Images	EfCtrl	E2KO	Retina 20x Images		P6 Retinas	EfCtrl	E2KO	P6 Retinas
		1-1	1981	28	1920	27	1-1		1-1	14.1343	14.0625	1-1		1	13.0765	18.639	1
		1-2	2033	32	1486	29	1-2		1-2	15.7403	19.5155	1-2		2	12.8219	17.6711	2
		1-3	2031	19	1347	31	1-3		1-3	9.355	23.0141	1-3		3	11.2751	18.2116	3
		2-1	1727	20	1503	27	1-4		2-1	11.5808	17.9641	1-4		4	11.356	16.3478	4
		2-2	1628	24	1748	34	2-1		2-2	14.742	19.4508	2-1		5	10.9219	15.7108	5
		2-3	1964	30	1600	29	2-2		2-3	15.2749	18.125	2-2		6	10.548	19.2119	6
		2-4	2064	20	1930	30	2-3		2-4	9.68992	15.544	2-3		7	14.4292	15.2061	7
		3-1	1692	22	1708	30	2-4		3-1	13.0024	17.5644	2-4		8	10.4008	17.4664	8
		3-2	1775	19	1743	30	3-1		3-2	10.7042	17.2117	3-1
		3-3	1702	18	1555	32	3-2		3-3	10.5758	20.5788	3-2
		3-4	1479	16	1768	28	3-3		3-4	10.8181	15.8371	3-3
		4-1	2212	29	1613	31	3-4		4-1	13.1103	19.2188	3-4
		4-2	2157	16	2031	41	4-1		4-2	7.41771	20.1871	4-1
		4-3	1465	21	1916	33	4-2		4-3	14.3345	17.2234	4-2			Tips per Angiogenic Front Length
		4-4	2083	22	2102	29	4-3		4-4	10.5617	13.7964	4-3			Overall Retina Averages
		5-1	1643	21	1410	20	4-4		5-1	12.7815	14.1844	4-4			EfCtrl	E2KO
		5-2	1321	13	1871	22	5-1		5-2	9.84103	11.7584	5-1			11.8537	17.3081
		5-3	1676	17	1713	29	5-2		5-3	10.1432	16.9294	5-2			SEM	SEM
		6-1	1756	18	1977	38	5-3		6-1	10.2506	19.221	5-3			0.5059	0.504639
		6-2	2321	31	1674	25	5-4		6-2	13.3563	14.9343	5-4			Ttest
		6-3	1551	14	1284	27	6-1		6-3	9.02643	21.028	6-1			2.35451e-06
		6-4	1360	13	1468	31	6-2		6-4	9.55882	21.1172	6-2
		7-1	1369	24	1740	26	6-3		7-1	17.531	14.9425	6-3
		7-2	1668	26	1417	28	6-4		7-2	15.5875	19.7601	6-4
		7-3	1639	19	1366	25	7-1		7-3	11.5924	18.3016	7-1
		7-4	1384	18	1282	20	7-2		7-4	13.0058	15.6006	7-2
		8-1	1689	18	1472	26	7-3		8-1	10.6572	17.663	7-3
		8-2	1355	14	1188	11	7-4		8-2	10.3321	9.25926	7-4
		8-3	1656	17	1721	30	8-1		8-3	10.2657	17.4317	8-1
		8-4	2126	22	1615	33	8-2		8-4	10.3481	20.4334	8-2
					2185	36	8-3				16.476	8-3
					1868	29	8-4				15.5246	8-4

## Sheet: Panel O
															Filopodia / Vascual Length
		EfCtrl			E2KO				Filopodia / Vascular Length						Individual Retina Averages
		Retina 63x Images	Vascular Length	Filopodia	Vascular Length	Filopodia	Retina 63x Images		Retina 63x Images	EfCtrl	E2KO	Retina 63x Images		P6 Retinas	EfCtrl	E2KO	P6 Retinas
		1-1	2743	113	3330	140	1-1		1-1	41.1958	42.042	1-1		1	29.5153	50.9387	1
		1-2	4042	126	3522	209	1-2		1-2	31.1727	59.3413	1-2		2	31.4399	53.5984	2
		1-3	5913	131	2722	140	1-3		1-3	22.1546	51.4328	1-3		3	30.574	45.4846	3
		1-4	2719	64	4529	185	2-1		1-4	23.5381	40.8479	2-1		4	39.0374	48.6719	4
		2-1	3948	130	2664	132	2-2		2-1	32.9281	49.5495	2-2
		2-2	1997	87	1318	106	2-3		2-2	43.5653	80.4249	2-3
		2-3	4002	106	2883	145	2-4		2-3	26.4868	50.2948	2-4
		2-4	4254	135	3712	174	2-5		2-4	31.7348	46.875	2-5
		2-5	4191	98	4088	182	3-1		2-5	23.3834	44.5205	3-1
		2-6	4584	140	3627	187	3-2		2-6	30.541	51.5578	3-2
		3-1	5154	122	4088	214	3-3		3-1	23.6709	52.3483	3-3
		3-2	3348	84	2805	94	3-4		3-2	25.0896	33.5116	3-4
		3-3	3108	104	3400	140	4-1		3-3	33.462	41.1765	4-1
		3-4	5564	159	3360	163	4-2		3-4	28.5766	48.5119	4-2			Filopodia / Vascual Length
		3-5	3803	165	2694	166	4-3		3-5	43.3868	61.6184	4-3			Overall Retina Averages
		3-6	2871	84	3412	134	4-4		3-6	29.2581	39.2732	4-4			EfCtrl	E2KO
		4-1	4112	77	1981	90	4-5		4-1	18.7257	45.4316	4-5			32.6417	49.6734
		4-2	3092	131	3588	201	4-6		4-2	42.3674	56.0201	4-6			SEM	SEM
		4-3	2857	115					4-3	40.252					2.16794	1.72134
		4-4	4442	120					4-4	27.0149					Ttest
		4-5	1527	108					4-5	70.7269					0.000845085
		4-6	3159	111					4-6	35.1377
