# Supplementary material for: Suppression of ischemia in arterial occlusive disease by JNK-promoted native collateral artery development
Source: eLife. 2016 Aug 9;5:e18414. doi: 10.7554/eLife.18414 (PMC4999312; doi:10.7554/eLife.18414)
Supplement: Figure 6—figure supplement 3—source data 1. — This file contains raw source data used to make the graphs presented in Figure 6—figure supplement 3. DOI: http://dx.doi.org/10.7554/eLife.18414.036 [file elife-18414-fig6-figsupp3-data1.xlsx]

## Sheet: Panel L
		WT		Map3k10-/-Map3k11-/-
		P6 Retinal Area		P6 Retinal Area				Percent Vascularized Retina
	Retina	Total	Vascularized	Total	Vascularized			WT	Map3k10-/-Map3k11-/-
	1	10295166	7127237	10676239	4674187			69.229	43.7812
	2	9430833	5892517	9300129	4017450			62.4814	43.1978
	3	9665639	6037124	8489094	3179883			62.4596	37.4584
	4	10064590	6895993	9412081	4784235			68.5174	50.8308
	5	10221390	7067915	9348118	3971758			69.1483	42.4872
								WT	Map3k10-/-Map3k11-/-
								66.3671	43.5511
								SEM	SEM
								1.59555	2.13803
								Ttest
								0.0001302

## Sheet: Panel M
							Percent of ROI Occupied by Vessels
	P6 Retina	Percent of ROI Occupied by Vessels		P6 Retina			Individual Retina Averages
	Quadrants	WT	Map3k10-/-Map3k11-/-	Quadrants		P6 Retinas	WT	Map3k10-/-Map3k11-/-	P6 Retinas
	1-1	45.818	66.209	1-1		1	42.9495	64.3667	1
	1-2	44.116	56.28	1-2		2	44.857	61.774	2
	1-3	41.425	70.611	1-3		3	46.3738	68.8398	3
	1-4	40.439	61.774	2-1		4	43.3233	64.1035	4
	2-1	47.293	74.776	3-1		5	46.4412	69.356	5
	2-2	42.708	59.959	3-2
	2-3	42.816	69.242	3-3
	2-4	46.611	71.382	3-4
	3-1	41.512	64.223	4-1
	3-2	52.522	60.192	4-2
	3-3	44.787	60.518	4-3
	3-4	46.674	71.481	4-4
	4-1	42.383	56.618	5-1			Percent of ROI Occupied by Vessels
	4-2	47.725	70.382	5-2			Overall Retina Averages
	4-3	45.524	78.697	5-3			WT	Map3k10-/-Map3k11-/-
	4-4	37.661	71.727	5-4			44.7889	65.688
	5-1	47.915					SEM	SEM
	5-2	46.797					0.734104	1.46567
	5-3	47.125					Ttest
	5-4	43.928					1.34956e-06

## Sheet: Panel N
															Tips per Angiogenic Front Length
		WT			Map3k10-/-Map3k11-/-				Tips per Angiogenic Front Length						Individual Retina Averages
		Retina 20x Images	Angiogenic Front Length	Tips	Angiogenic Front Length	Tips	Retina 20x Images		Retina 20x Images	WT	Map3k10-/-Map3k11-/-	Retina 20x Images		P6 Retinas	WT	Map3k10-/-Map3k11-/-	P6 Retinas
		1-1	1185	23	1319	22	1-1		1-1	19.4093	16.6793	1-1		1	15.3969	21.6246	1
		1-2	1403	22	1512	39	1-2		1-2	15.6807	25.7937	1-2		2	13.9907	18.661	2
		1-3	1766	24	1741	39	1-3		1-3	13.59	22.4009	1-3		3	13.302	21.9127	3
		1-4	1472	19	1476	25	2-1		1-4	12.9076	16.9377	2-1		4	11.4019	20.7002	4
		2-1	1396	20	1717	35	2-2		2-1	14.3266	20.3844	2-2		5	11.8024	18.5947	5
		2-2	1293	24	1417	35	3-1		2-2	18.5615	24.7001	3-1
		2-3	1974	20	1608	34	3-2		2-3	10.1317	21.1443	3-2
		2-4	1468	19	1545	33	3-3		2-4	12.9428	21.3592	3-3
		3-1	1401	18	1565	32	3-4		3-1	12.848	20.4473	3-4
		3-2	1672	23	1368	30	4-1		3-2	13.756	21.9298	4-1
		4-1	1641	19	1529	33	4-2		4-1	11.5783	21.5827	4-2
		4-2	1541	17	1921	36	4-3		4-2	11.0318	18.7402	4-3
		4-3	1812	20	1460	30	4-4		4-3	11.0375	20.5479	4-4
		4-4	1505	18	2178	35	5-1		4-4	11.9601	16.0698	5-1			Tips per Angiogenic Front Length
		5-1	1734	19	1504	26	5-2		5-1	10.9573	17.2872	5-2			Overall Retina Averages
		5-2	1862	21	1714	33	5-3		5-2	11.2782	19.2532	5-3			WT	Map3k10-/-Map3k11-/-
		5-3	1419	16	1470	32	5-4		5-3	11.2755	21.7687	5-4			13.1788	20.2987
		5-4	1314	18					5-4	13.6986					SEM	SEM
															0.729585	0.710977
															Ttest
															0.000113875

## Sheet: Panel O
															Filopodia / Vascual Length
		WT			Map3k10-/-Map3k11-/-				Filopodia / Vascular Length						Individual Retina Averages
		Retina 63x Images	Vascular Length	Filopodia	Vascular Length	Filopodia	Retina 63x Images		Retina 63x Images	WT	Map3k10-/-Map3k11-/-	Retina 63x Images		P6 Retinas	WT	Map3k10-/-Map3k11-/-	P6 Retinas
		1-1	2589	59	5396	237	1-1		1-1	22.7887	43.9214	1-1		1	26.5853	53.6051	1
		1-2	4096	128	2956	165	1-2		1-2	31.25	55.8187	1-2		2	35.0556	44.4791	2
		1-3	2163	73	3774	227	1-3		1-3	33.7494	60.1484	1-3		3	37.7997	42.8494	3
		1-4	4312	80	4071	222	1-4		1-4	18.5529	54.5321	1-4		4	31.344	59.7016	4
		2-1	3389	109	4118	200	2-1		2-1	32.1629	48.5673	2-1		5	34.3213	47.8042	5
		2-2	3539	146	4923	212	2-2		2-2	41.2546	43.0632	2-2
		2-3	4197	140	3857	153	2-3		2-3	33.3572	39.6681	2-3
		2-4	3498	117	4376	204	2-4		2-4	33.4477	46.6179	2-4
		3-1	1920	71	3735	159	3-1		3-1	36.9792	42.5703	3-1
		3-2	3569	144	2035	113	3-2		3-2	40.3474	55.5283	3-2
		3-3	3366	117	3514	107	3-3		3-3	34.7594	30.4496	3-3
		3-4	4960	194	4259	204	4-1		3-4	39.1129	47.8986	4-1
		4-1	2712	83	2889	229	4-2		4-1	30.6047	79.2662	4-2
		4-2	2785	84	3023	172	4-3		4-2	30.1616	56.8971	4-3			Filopodia / Vascual Length
		4-3	3300	102	3288	180	4-4		4-3	30.9091	54.7445	4-4			Overall Retina Averages
		4-4	3175	107	3465	182	5-1		4-4	33.7008	52.5253	5-1			WT	Map3k10-/-Map3k11-/-
		5-1	3301	109	4543	186	5-2		5-1	33.0203	40.9421	5-2			33.0212	49.6879
		5-2	4672	131	3046	138	5-3		5-2	28.0394	45.3053	5-3			SEM	SEM
		5-3	2983	125	3928	206	5-4		5-3	41.9041	52.444	5-4			1.90915	3.10696
															Ttest
															0.00182479
