# Supplementary material for: Suppression of ischemia in arterial occlusive disease by JNK-promoted native collateral artery development
Source: eLife. 2016 Aug 9;5:e18414. doi: 10.7554/eLife.18414 (PMC4999312; doi:10.7554/eLife.18414)
Supplement: Figure 7—figure supplement 1—source data 1. — This file contains raw source data used to make the graphs presented in Figure 7—figure supplement 1. DOI: http://dx.doi.org/10.7554/eLife.18414.040 [file elife-18414-fig7-figsupp1-data1.xlsx]

## Sheet: RNA Seq Data
All named genes FPKM in ECtrl ≥ 2 and < 2 if FPKM ≥ 2 in E3KO, log2 fold change ≤ -0.5 or ≥ +0.5, q < 0.05 between ECtrl, EfCtrl vs. E3KO
test_id	gene_id	gene	locus	sample_1	sample_2	status	value_1	value_2	log2(fold_change)	test_stat	p_value	q_value	significant	gene	ECtrl Rep 1	ECtrl Rep 2	ECtrl Rep 3	E3KO Rep 1	E3KO Rep 2	E3KO Rep 3
XLOC_017821	XLOC_017821	9230102O04Rik,Gata3	2:9857077-9890034	ECtrl	E3KO	OK	0.337478	2.49085	2.88378	2.07769	5e-05	0.000724232	yes	9230102O04Rik,Gata3	0.087443	0.224078	0.0824335	1.03107	0.579285	0.71326
XLOC_010510	XLOC_010510	Abcc4	14:118482691-118706219	ECtrl	E3KO	OK	4.15731	6.33916	0.608643	2.01728	0.00065	0.00667132	yes	Abcc4	3.33364	3.6402	4.60084	6.17582	4.58081	5.38562
XLOC_027680	XLOC_027680	Abcc9	6:142587861-142702274	ECtrl	E3KO	OK	2.27663	4.50679	0.985202	3.12159	5e-05	0.000724232	yes	Abcc9	1.22549	2.82444	2.29707	2.63985	4.67229	4.39317
XLOC_026171	XLOC_026171	Abcg2	6:58584522-58692869	ECtrl	E3KO	OK	38.5082	76.9702	0.999133	1.67625	0.00455	0.0323455	yes	Abcg2	36.7741	46.5818	24.1734	91.0888	53.8449	50.5262
XLOC_021079	XLOC_021079	Acadm	3:153922356-153944632	ECtrl	E3KO	OK	37.7916	21.7488	-0.797128	-2.93849	5e-05	0.000724232	yes	Acadm	42.5392	28.2859	33.3716	13.74	22.2932	19.5807
XLOC_021664	XLOC_021664	Acer2	4:86874395-86934822	ECtrl	E3KO	OK	2.84905	6.00684	1.07612	2.45167	5e-05	0.000724232	yes	Acer2	1.67505	1.2993	1.17351	3.04912	1.7897	3.00758
XLOC_033790	XLOC_033790	Acpp	9:104288250-104337728	ECtrl	E3KO	OK	4.83063	8.24896	0.772001	2.39155	5e-05	0.000724232	yes	Acpp	2.07411	7.00441	4.51223	8.05442	6.77625	6.43429
XLOC_031078	XLOC_031078	Acsl1	8:46471040-46536051	ECtrl	E3KO	OK	10.7307	7.13282	-0.589205	-1.45801	0.00295	0.0229449	yes	Acsl1	12.0692	8.64409	9.87472	4.092	6.71973	7.59002
XLOC_015803	XLOC_015803	Acta2	19:34241089-34255336	ECtrl	E3KO	OK	14.3486	6.49473	-1.14357	-3.23926	5e-05	0.000724232	yes	Acta2	4.313	19.443	15.6434	4.48957	6.31515	5.74484
XLOC_019242	XLOC_019242	Ada	2:163726583-163750239	ECtrl	E3KO	OK	16.0241	24.1369	0.590996	1.88911	0.00085	0.0083291	yes	Ada	12.9353	11.8997	13.4445	13.2441	19.6722	20.8047
XLOC_012604	XLOC_012604	Adamts1	16:85793826-85803113	ECtrl	E3KO	OK	11.0989	16.5012	0.572153	2.09855	0.0001	0.00134402	yes	Adamts1	8.27132	9.09587	11.4632	13.0827	11.0898	15.1996
XLOC_033308	XLOC_033308	Adamts15	9:30899154-30922452	ECtrl	E3KO	OK	3.65069	0.956592	-1.9322	-4.67887	5e-05	0.000724232	yes	Adamts15	4.01626	2.46664	3.51078	0.497548	1.03315	0.920337
XLOC_012605	XLOC_012605	Adamts5	16:85858169-85901125	ECtrl	E3KO	OK	9.6488	25.2821	1.3897	5.79076	5e-05	0.000724232	yes	Adamts5	7.2459	9.54241	11.138	16.4394	23.3472	27.3104
XLOC_027345	XLOC_027345	Adamts9	6:92772698-93272889	ECtrl	E3KO	OK	1.77464	4.30697	1.27915	3.64632	5e-05	0.000724232	yes	Adamts9	1.21058	1.94004	1.96895	3.44052	3.49225	4.10897
XLOC_003015	XLOC_003015	Adarb1	10:77290725-77418270	ECtrl	E3KO	OK	20.979	12.1006	-0.793867	-1.93808	0.0001	0.00134402	yes	Adarb1	20.1936	18.262	19.9386	6.11322	14.1224	11.2371
XLOC_012170	XLOC_012170	Adcy9	16:4287528-4420498	ECtrl	E3KO	OK	4.37704	6.98547	0.674402	2.09151	0.0002	0.00245954	yes	Adcy9	2.5151	3.80889	5.56135	7.25998	5.21744	4.91952
XLOC_031734	XLOC_031734	Adrb3	8:27225775-27229588	ECtrl	E3KO	OK	1.34356	5.13197	1.93346	3.60556	5e-05	0.000724232	yes	Adrb3	1.2622	1.63231	1.2117	9.33947	3.21028	2.37891
XLOC_020930	XLOC_020930	Agl	3:116739998-116808166	ECtrl	E3KO	OK	5.67278	10.2401	0.852103	2.7918	5e-05	0.000724232	yes	Agl	4.44902	6.34353	5.30008	9.36181	8.86239	8.21174
XLOC_023765	XLOC_023765	Agtrap	4:148077060-148088031	ECtrl	E3KO	OK	27.0306	19.0699	-0.503293	-2.01931	0.0007	0.00709513	yes	Agtrap	25.097	22.4861	26.3586	13.7749	19.1195	15.4461
XLOC_020866	XLOC_020866	Ahcyl1	3:107663117-107696560	ECtrl	E3KO	OK	51.9451	78.1927	0.590047	2.42868	5e-05	0.000724232	yes	Ahcyl1	48.8358	54.4916	48.7513	71.6509	64.332	73.1446
XLOC_013857	XLOC_013857	Aif1	17:35170990-35176068	ECtrl	E3KO	OK	0.289631	4.18111	3.8516	2.70851	5e-05	0.000724232	yes	Aif1	0.126046	0.517527	0.128669	8.33801	0.649266	1.13287
XLOC_000852	XLOC_000852	Aim2	1:173334253-173466040	ECtrl	E3KO	OK	3.36061	15.2993	2.18667	3.08509	5e-05	0.000724232	yes	Aim2	1.88531	4.74694	2.8339	10.7646	12.5866	17.8266
XLOC_021774	XLOC_021774	Ak4	4:101419276-101466995	ECtrl	E3KO	OK	1.12524	2.96171	1.3962	2.39037	5e-05	0.000724232	yes	Ak4	1.24781	1.03857	0.839825	4.45293	1.25329	1.70184
XLOC_025927	XLOC_025927	Akr1b10	6:34384217-34396950	ECtrl	E3KO	OK	12.9632	19.9729	0.62362	1.91667	0.0007	0.00709513	yes	Akr1b10	10.9962	11.9285	13.2556	16.2605	15.703	19.3632
XLOC_008420	XLOC_008420	Aldh5a1	13:24905592-24941417	ECtrl	E3KO	OK	2.26177	1.25294	-0.852133	-2.01164	0.00085	0.0083291	yes	Aldh5a1	2.58664	2.06507	1.81096	0.832902	1.45039	0.991786
XLOC_036492	XLOC_036492	Ammecr1	X:142851145-142966728	ECtrl	E3KO	OK	6.82453	9.89841	0.536468	1.98676	0.00085	0.0083291	yes	Ammecr1	3.67128	8.65787	7.83807	8.01696	9.50353	9.05013
XLOC_028789	XLOC_028789	Ampd3	7:110766676-110844457	ECtrl	E3KO	OK	59.9625	26.8591	-1.15865	-1.44145	0.00185	0.0157782	yes	Ampd3	57.0554	46.8453	53.3501	20.3179	27.5206	18.1314
XLOC_020969	XLOC_020969	Ank2	3:126921606-126998452	ECtrl	E3KO	OK	8.90566	4.91445	-0.857692	-3.0593	5e-05	0.000724232	yes	Ank2	9.8826	8.16865	6.91629	2.29238	5.26323	5.23827
XLOC_033197	XLOC_033197	Ankrd49	9:14780208-14782964	ECtrl	E3KO	OK	7.99925	11.7586	0.555779	1.66938	0.0038	0.0280514	yes	Ankrd49	7.4457	7.66682	7.83443	13.916	7.35807	8.92051
XLOC_033284	XLOC_033284	Anln	9:22331213-22389206	ECtrl	E3KO	OK	14.581	7.38707	-0.981015	-3.74368	5e-05	0.000724232	yes	Anln	15.6166	14.2614	12.0481	6.67283	5.95291	6.48611
XLOC_018722	XLOC_018722	Ano3	2:110655200-110950923	ECtrl	E3KO	OK	6.8375	17.722	1.374	4.43407	5e-05	0.000724232	yes	Ano3	2.8676	8.34169	8.46217	12.5995	16.9928	17.2962
XLOC_030105	XLOC_030105	Anpep	7:79821802-79848210	ECtrl	E3KO	OK	3.77286	8.84867	1.2298	3.42656	5e-05	0.000724232	yes	Anpep	1.05959	3.78102	5.48247	7.83075	5.67758	8.82135
XLOC_027289	XLOC_027289	Antxr1	6:87133853-87335775	ECtrl	E3KO	OK	41.1225	25.7261	-0.676696	-2.89056	5e-05	0.000724232	yes	Antxr1	38.2897	35.9297	40.4395	19.996	25.2749	20.686
XLOC_024353	XLOC_024353	Anxa3	5:96793384-96845968	ECtrl	E3KO	OK	46.2928	77.025	0.734539	2.93837	5e-05	0.000724232	yes	Anxa3	24.1981	56.9815	46.6139	61.0057	62.1656	70.5663
XLOC_005227	XLOC_005227	Anxa6	11:54979107-55033445	ECtrl	E3KO	OK	101.261	66.2795	-0.611447	-2.62137	5e-05	0.000724232	yes	Anxa6	91.2727	78.923	101.277	50.7634	62.3518	52.4883
XLOC_028418	XLOC_028418	Apba2	7:64501705-64753870	ECtrl	E3KO	OK	6.60055	3.29653	-1.00164	-2.60084	5e-05	0.000724232	yes	Apba2	7.43197	4.06508	7.15828	3.25573	3.42606	3.18168
XLOC_030396	XLOC_030396	Apbb1	7:105558485-105574402	ECtrl	E3KO	OK	2.38829	0.987823	-1.27365	-2.25336	0.00045	0.00489747	yes	Apbb1	2.38444	1.80375	2.137	0.687699	1.08679	0.706149
XLOC_035775	XLOC_035775	Apln	X:48025145-48034853	ECtrl	E3KO	OK	140.296	231.649	0.723469	3.10261	5e-05	0.000724232	yes	Apln	79.0318	182.422	126.368	186.785	192.944	214.795
XLOC_012376	XLOC_012376	Apod	16:31296191-31314808	ECtrl	E3KO	OK	0.96788	5.28701	2.44955	2.76043	0.0006	0.0062413	yes	Apod	0.852021	0.880455	0.95767	11.4552	0.532994	0.602106
XLOC_029370	XLOC_029370	Apoe	7:19696108-19699166	ECtrl	E3KO	OK	1.44001	5.39264	1.90491	2.2636	5e-05	0.000724232	yes	Apoe	0.86812	1.31502	1.63757	3.07018	4.38245	5.90456
XLOC_034845	XLOC_034845	Apoo	X:94367116-94417093	ECtrl	E3KO	OK	4.55939	8.7201	0.935504	1.72714	0.0021	0.0174552	yes	Apoo	6.03936	4.59681	2.64446	12.6708	4.17152	5.7765
XLOC_026136	XLOC_026136	Aqp1	6:55336431-55348555	ECtrl	E3KO	OK	613.275	885.593	0.530111	2.18824	0.0001	0.00134402	yes	Aqp1	600.603	480.34	576.531	729.522	775.91	726.963
XLOC_033183	XLOC_033183	Arhgap42	9:8994952-9239013	ECtrl	E3KO	OK	8.72372	4.3997	-0.987537	-3.46463	5e-05	0.000724232	yes	Arhgap42	9.08245	8.43364	7.86121	2.80939	4.70067	4.14533
XLOC_030868	XLOC_030868	Arhgef10	8:14911662-15001085	ECtrl	E3KO	OK	8.2124	5.00514	-0.714394	-1.82271	0.00105	0.00990498	yes	Arhgef10	8.81626	7.62924	6.79862	3.89372	4.69753	4.11437
XLOC_019677	XLOC_019677	Arhgef26	3:62338343-62462221	ECtrl	E3KO	OK	2.95384	1.04232	-1.50279	-2.44224	5e-05	0.000724232	yes	Arhgef26	3.32321	2.62066	2.08746	0.50668	1.08025	0.953264
XLOC_009097	XLOC_009097	Arhgef3	14:27238038-27403904	ECtrl	E3KO	OK	16.5342	11.0275	-0.584351	-2.18265	5e-05	0.000724232	yes	Arhgef3	18.0278	11.3896	16.8361	6.50798	11.5764	10.486
XLOC_022775	XLOC_022775	Arhgef39	4:43496141-43499695	ECtrl	E3KO	OK	3.14712	1.13724	-1.46849	-1.71923	0.0015	0.0132916	yes	Arhgef39	5.05972	1.77805	1.96073	0.615604	0.838571	1.48513
XLOC_035123	XLOC_035123	Armcx4	X:134686518-134696757	ECtrl	E3KO	OK	6.33195	9.7403	0.621315	2.46567	5e-05	0.000724232	yes	Armcx4	4.89864	5.97038	6.24039	6.09566	8.86888	9.56516
XLOC_028799	XLOC_028799	Arntl	7:113207464-113314122	ECtrl	E3KO	OK	8.35271	12.7838	0.614002	2.08479	0.00045	0.00489747	yes	Arntl	8.01648	7.29416	8.02973	14.1499	8.71689	9.62018
XLOC_008065	XLOC_008065	Arrdc3	13:80883383-80896035	ECtrl	E3KO	OK	81.8518	50.8937	-0.685526	-2.41721	5e-05	0.000724232	yes	Arrdc3	87.4868	72.7421	73.0645	35.465	53.7686	42.0841
XLOC_024315	XLOC_024315	Art3	5:92331826-92414628	ECtrl	E3KO	OK	1.81593	6.30469	1.79571	2.08829	0.0001	0.00134402	yes	Art3	1.84544	2.09597	2.2977	10.9605	2.85778	2.29996
XLOC_007556	XLOC_007556	Asb13	13:3634031-3651774	ECtrl	E3KO	OK	6.21534	3.78397	-0.715933	-1.67052	0.0024	0.0194009	yes	Asb13	6.31008	5.81492	4.09234	2.13008	2.792	3.99607
XLOC_025802	XLOC_025802	Asb4	6:5383385-5433022	ECtrl	E3KO	OK	0.987049	3.45031	1.80553	3.17725	5e-05	0.000724232	yes	Asb4	0.252199	0.612492	1.88382	2.07426	2.37759	4.54042
XLOC_031274	XLOC_031274	Asf1b	8:83955506-83970197	ECtrl	E3KO	OK	6.85102	2.37707	-1.52713	-2.7607	5e-05	0.000724232	yes	Asf1b	8.10624	5.61294	5.03783	0.518047	2.37757	3.26721
XLOC_000681	XLOC_000681	Aspm	1:139454772-139494090	ECtrl	E3KO	OK	3.56345	1.77074	-1.00892	-3.29997	5e-05	0.000724232	yes	Aspm	3.34863	3.92372	2.96961	1.22726	1.69209	1.68885
XLOC_016362	XLOC_016362	Ass1	2:31470206-31520672	ECtrl	E3KO	OK	14.5103	35.662	1.29731	4.40541	5e-05	0.000724232	yes	Ass1	9.85084	12.9658	16.5066	30.9305	26.3921	31.9633
XLOC_024943	XLOC_024943	Atg9b	5:24364809-24392143	ECtrl	E3KO	OK	1.62744	4.37114	1.42541	2.07131	0.00135	0.0121853	yes	Atg9b	1.04587	1.79692	1.28587	3.65836	2.4414	3.93278
XLOC_004506	XLOC_004506	Atp6v0a1	11:101009451-101063719	ECtrl	E3KO	OK	48.0545	74.2801	0.628305	1.72909	0.00325	0.0247798	yes	Atp6v0a1	36.7406	41.472	49.005	74.1283	59.2223	57.1431
XLOC_025157	XLOC_025157	Atp8a1	5:67607882-67909013	ECtrl	E3KO	OK	4.02021	6.92211	0.78394	1.50977	0.00235	0.0190851	yes	Atp8a1	3.46356	4.54075	4.07235	5.66143	5.89611	8.34664
XLOC_022173	XLOC_022173	Aunip	4:134510998-134523927	ECtrl	E3KO	OK	2.54629	1.19869	-1.08694	-1.65016	0.00445	0.0317709	yes	Aunip	3.86873	2.05631	0.986437	1.3345	1.15181	0.524004
XLOC_019351	XLOC_019351	Aurka	2:172356189-172370535	ECtrl	E3KO	OK	17.3221	9.27543	-0.901127	-2.29805	0.0001	0.00134402	yes	Aurka	18.1848	13.6949	15.8767	7.09738	7.1637	7.74265
XLOC_029488	XLOC_029488	Axl	7:25757272-25788705	ECtrl	E3KO	OK	5.76615	11.0848	0.942903	1.92374	0.0023	0.0187672	yes	Axl	1.61955	5.98378	8.1265	5.32	9.76904	13.3571
XLOC_031927	XLOC_031927	B3gnt3	8:71691718-71701800	ECtrl	E3KO	OK	4.90922	11.0695	1.17302	3.05106	5e-05	0.000724232	yes	B3gnt3	3.49989	5.18399	4.71257	8.93283	9.41147	9.73146
XLOC_012152	XLOC_012152	Bace2	16:97356727-97439012	ECtrl	E3KO	OK	3.21523	6.68804	1.05666	3.13862	5e-05	0.000724232	yes	Bace2	1.96423	3.5454	3.4438	6.57604	5.04703	5.46433
XLOC_014270	XLOC_014270	Bambi	18:3507956-3516404	ECtrl	E3KO	OK	1.29176	2.93774	1.18537	3.02334	5e-05	0.000724232	yes	Bambi	1.17676	1.38795	1.20724	3.12931	2.38402	2.18296
XLOC_029373	XLOC_029373	Bcam	7:19756130-19775403	ECtrl	E3KO	OK	2.22834	4.06795	0.868333	1.59857	0.00275	0.0216705	yes	Bcam	1.82902	1.39418	2.82831	2.75425	3.51727	3.97537
XLOC_020115	XLOC_020115	Bcar3	3:122419779-122530180	ECtrl	E3KO	OK	2.21481	3.50305	0.661429	1.59539	0.006	0.040095	yes	Bcar3	1.60285	2.13447	2.27228	3.37942	2.606	2.7112
XLOC_031395	XLOC_031395	Bean1	8:104170512-104219092	ECtrl	E3KO	OK	8.87254	3.21844	-1.46299	-3.98062	5e-05	0.000724232	yes	Bean1	7.49548	6.64833	10.41	1.94158	3.37874	2.88826
XLOC_034680	XLOC_034680	Bgn	X:73483601-73495933	ECtrl	E3KO	OK	18.3715	114.13	2.63514	10.0676	5e-05	0.000724232	yes	Bgn	8.31414	21.4434	20.7661	85.8171	80.3812	126.579
XLOC_004745	XLOC_004745	Birc5	11:117849250-117855743	ECtrl	E3KO	OK	33.928	22.6515	-0.582872	-1.81414	0.0014	0.0125573	yes	Birc5	46.2369	26.018	22.5181	25.9972	14.6281	16.0827
XLOC_030119	XLOC_030119	Blm	7:80454992-80535119	ECtrl	E3KO	OK	2.06585	1.0439	-0.984745	-2.31192	0.00015	0.00192134	yes	Blm	2.42084	2.08037	1.42814	0.695085	1.06693	0.956988
XLOC_029361	XLOC_029361	Bloc1s3	7:19505813-19508331	ECtrl	E3KO	OK	15.0948	24.6072	0.705028	2.23838	0.0002	0.00245954	yes	Bloc1s3	17.8956	14.166	9.93729	28.4002	17.1561	16.3154
XLOC_010123	XLOC_010123	Bmp4	14:46379413-46390669	ECtrl	E3KO	OK	43.2918	64.2916	0.570537	2.1142	0.0001	0.00134402	yes	Bmp4	35.3366	44.7541	36.1505	63.7303	43.6945	53.632
XLOC_007827	XLOC_007827	Bmp6	13:38345715-38499728	ECtrl	E3KO	OK	17.5452	12.0668	-0.540033	-1.78362	0.00305	0.0235647	yes	Bmp6	18.6239	15.1962	13.5203	11.6876	8.61052	9.75976
XLOC_009695	XLOC_009695	Bora	14:99046426-99074537	ECtrl	E3KO	OK	3.03133	1.52582	-0.990366	-2.08877	0.0008	0.00791745	yes	Bora	3.77102	2.67192	2.22422	0.831722	1.1507	2.00282
XLOC_024119	XLOC_024119	Bst1	5:43744615-43843247	ECtrl	E3KO	OK	2.15799	7.51323	1.79975	1.40787	0.0062	0.0410945	yes	Bst1	1.78644	2.37424	1.86504	6.71239	5.34933	7.58142
XLOC_018899	XLOC_018899	Bub1	2:127801121-127831865	ECtrl	E3KO	OK	8.23461	4.4799	-0.878234	-2.09445	5e-05	0.000724232	yes	Bub1	9.63993	9.98263	4.60628	4.55547	3.36783	3.92203
XLOC_017843	XLOC_017843	C1ql3	2:13003456-13011747	ECtrl	E3KO	OK	1.3543	3.27045	1.27194	2.38176	0.0002	0.00245954	yes	C1ql3	0.905254	2.15823	0.713307	2.53449	2.43382	3.39979
XLOC_014122	XLOC_014122	C3	17:57203969-57228136	ECtrl	E3KO	OK	2.18194	11.2211	2.36253	1.90008	0.0007	0.00709513	yes	C3	0.637698	0.487077	3.48537	15.6365	4.24083	4.10138
XLOC_031287	XLOC_031287	Cacna1a	8:84388439-84640246	ECtrl	E3KO	OK	1.32128	4.81137	1.86451	2.10025	0.00065	0.00667132	yes	Cacna1a	0.213135	0.215417	0.642186	6.90881	0.540175	0.912549
XLOC_026849	XLOC_026849	Cadps2	6:23262772-23839421	ECtrl	E3KO	OK	3.60554	1.74738	-1.04502	-2.12416	0.00025	0.00297984	yes	Cadps2	5.80533	3.09402	1.4942	1.6034	1.59487	1.28604
XLOC_022229	XLOC_022229	Camk2n1	4:138454313-138460123	ECtrl	E3KO	OK	12.0676	18.6062	0.624645	2.3706	5e-05	0.000724232	yes	Camk2n1	11.6317	12.8746	9.48601	15.9556	14.9523	16.6326
XLOC_036673	XLOC_036673	Car5b	X:163976821-164027997	ECtrl	E3KO	OK	3.80962	6.90059	0.857075	2.56225	5e-05	0.000724232	yes	Car5b	3.141	3.82967	3.93263	7.25829	5.47651	5.20579
XLOC_022549	XLOC_022549	Car8	4:8143366-8239041	ECtrl	E3KO	OK	12.8348	21.2089	0.724615	2.87396	5e-05	0.000724232	yes	Car8	9.26201	12.783	15.061	14.5175	17.793	24.0701
XLOC_032278	XLOC_032278	Casp1	9:5298516-5307265	ECtrl	E3KO	OK	1.83551	4.18639	1.18953	2.35954	0.0002	0.00245954	yes	Casp1	0.859805	1.65078	2.59984	4.5283	2.82239	3.39395
XLOC_032280	XLOC_032280	Casp12	9:5345429-5373032	ECtrl	E3KO	OK	9.6449	3.81427	-1.33836	-2.04522	0.0003	0.00348276	yes	Casp12	9.72177	11.4558	6.31969	1.08547	4.60945	4.34559
XLOC_032279	XLOC_032279	Casp4	9:5308827-5336783	ECtrl	E3KO	OK	10.8747	25.0189	1.20204	1.95407	0.0008	0.00791745	yes	Casp4	7.20039	13.8251	9.46575	29.3308	15.647	17.6823
XLOC_025832	XLOC_025832	Cav1	6:17197750-17385604	ECtrl	E3KO	OK	713.081	473.012	-0.59219	-1.93361	0.0009	0.00873141	yes	Cav1	674.428	724.734	682.54	414.677	409.561	421.383
XLOC_012130	XLOC_012130	Cbr3	16:93683214-93690990	ECtrl	E3KO	OK	1.03912	3.07175	1.5637	1.92659	0.00255	0.020354	yes	Cbr3	0.195917	0.721774	1.92869	4.9404	0.968265	1.37164
XLOC_004755	XLOC_004755	Cbx2	11:119022961-119031270	ECtrl	E3KO	OK	4.07735	2.15436	-0.920375	-2.28658	0.0001	0.00134402	yes	Cbx2	4.01513	2.78864	4.42468	1.4409	2.18628	1.8895
XLOC_033137	XLOC_033137	Ccbp2	9:121898463-121911064	ECtrl	E3KO	OK	18.3653	28.101	0.613644	2.30165	5e-05	0.000724232	yes	Ccbp2	15.09	15.1529	20.4314	22.6545	25.378	23.3751
XLOC_014876	XLOC_014876	Ccdc112	18:46282150-46311928	ECtrl	E3KO	OK	2.28068	0.993775	-1.19847	-2.33082	0.0002	0.00245954	yes	Ccdc112	2.5003	2.52683	1.62537	0.0616033	1.48579	1.1073
XLOC_026101	XLOC_026101	Ccdc126	6:49319273-49341582	ECtrl	E3KO	OK	5.01899	8.09139	0.688991	1.94749	0.00075	0.007507	yes	Ccdc126	4.92607	4.69099	5.35935	11.2125	5.21636	4.76673
XLOC_011304	XLOC_011304	Ccdc166	15:75979871-75982285	ECtrl	E3KO	OK	1.24901	2.64385	1.08185	1.78695	0.00345	0.0260091	yes	Ccdc166	2.0247	0.870679	0.611214	4.9579	0.9758	0.493919
XLOC_026354	XLOC_026354	Ccdc48	6:87730868-87755912	ECtrl	E3KO	OK	9.14563	4.71795	-0.954924	-2.17241	0.00015	0.00192134	yes	Ccdc48	4.50671	5.49802	7.66876	1.00123	4.00311	2.9327
XLOC_032304	XLOC_032304	Ccdc82	9:13246981-13289409	ECtrl	E3KO	OK	8.05178	4.35564	-0.886423	-1.95953	0.0006	0.0062413	yes	Ccdc82	7.43232	8.41491	7.03249	1.13938	5.62931	5.07928
XLOC_005068	XLOC_005068	Ccdc99	11:34809189-34833641	ECtrl	E3KO	OK	3.83764	2.27889	-0.751887	-1.82441	0.0014	0.0125573	yes	Ccdc99	4.39405	3.49353	2.7555	1.7889	1.55572	2.29511
XLOC_004231	XLOC_004231	Ccl2	11:82028223-82038562	ECtrl	E3KO	OK	233.262	591.317	1.34198	5.73797	5e-05	0.000724232	yes	Ccl2	143.667	268.91	239.037	536.611	481.584	513.914
XLOC_022760	XLOC_022760	Ccl21a	4:42735544-42856771	ECtrl	E3KO	OK	6.21098	0.925249	-2.74691	-3.50398	0.0001	0.00134402	yes	Ccl21a	9.83492	2.02684	5.1452	1.0214	0.705457	0.590778
XLOC_004232	XLOC_004232	Ccl7	11:82045711-82047525	ECtrl	E3KO	OK	10.8574	41.1501	1.92222	5.09198	5e-05	0.000724232	yes	Ccl7	5.28281	15.5034	9.58731	28.2775	35.5641	43.5322
XLOC_020373	XLOC_020373	Ccna2	3:36552605-36572150	ECtrl	E3KO	OK	29.0429	12.0317	-1.27135	-2.80345	5e-05	0.000724232	yes	Ccna2	36.9497	24.8233	22.6291	14.1401	8.08557	8.98171
XLOC_008848	XLOC_008848	Ccnb1	13:100778649-100786570	ECtrl	E3KO	OK	7.69809	3.43857	-1.16269	-2.85332	5e-05	0.000724232	yes	Ccnb1	10.0512	7.48227	4.91654	1.92421	3.31274	3.73289
XLOC_033625	XLOC_033625	Ccnb2	9:70407688-70421554	ECtrl	E3KO	OK	31.8339	13.4378	-1.24427	-4.18972	5e-05	0.000724232	yes	Ccnb2	39.5697	23.954	23.7593	12.7137	9.39383	11.6308
XLOC_013647	XLOC_013647	Ccnf	17:24223231-24251409	ECtrl	E3KO	OK	5.74003	2.84496	-1.01265	-2.15441	5e-05	0.000724232	yes	Ccnf	6.07163	5.28099	3.96556	1.56122	2.76424	2.8675
XLOC_005087	XLOC_005087	Ccng1	11:40748551-40755311	ECtrl	E3KO	OK	111.434	204.191	0.873728	3.72384	5e-05	0.000724232	yes	Ccng1	85.0495	128.519	116.541	148.929	186.667	211.531
XLOC_024651	XLOC_024651	Cct6a	5:129787438-129845820	ECtrl	E3KO	OK	534.744	1320.97	1.30467	22.7377	5e-05	0.000724232	yes	Cct6a	140.949	133.461	128.369	151.179	139.551	130.874
XLOC_000252	XLOC_000252	Cd28	1:60716799-60773359	ECtrl	E3KO	OK	1.08864	2.15713	0.986584	2.16842	0.0002	0.00245954	yes	Cd28	0.466626	1.44071	1.2551	0.808282	3.02554	2.02004
XLOC_004543	XLOC_004543	Cd300lg	11:102041508-102055620	ECtrl	E3KO	OK	5.27485	1.98805	-1.40777	-2.97636	5e-05	0.000724232	yes	Cd300lg	8.08879	3.22058	3.10084	2.34482	1.4781	1.152
XLOC_000968	XLOC_000968	Cd34	1:194938820-195037908	ECtrl	E3KO	OK	282.354	475.133	0.750825	3.15749	5e-05	0.000724232	yes	Cd34	178.814	298.498	312.648	406.93	416.186	401.501
XLOC_024904	XLOC_024904	Cd36	5:17781689-17888959	ECtrl	E3KO	OK	15.9663	26.7593	0.745009	2.94787	5e-05	0.000724232	yes	Cd36	18.0275	14.2399	14.5341	23.2474	20.0292	27.5151
XLOC_023564	XLOC_023564	Cd52	4:134065911-134095082	ECtrl	E3KO	OK	1.36984	14.3844	3.39243	3.79941	5e-05	0.000724232	yes	Cd52	0.664732	2.27311	0.840599	25.2278	4.06347	6.5436
XLOC_020856	XLOC_020856	Cd53	3:106758860-106790149	ECtrl	E3KO	OK	3.99651	12.5821	1.65456	4.97406	5e-05	0.000724232	yes	Cd53	2.45585	5.88569	3.70324	11.572	9.42537	13.2212
XLOC_001501	XLOC_001501	Cd55	1:130439026-130557075	ECtrl	E3KO	OK	52.9987	82.6498	0.641056	2.06124	0.00045	0.00489747	yes	Cd55	57.3828	54.2876	42.1909	73.1859	71.1221	73.639
XLOC_016974	XLOC_016974	Cd59a	2:104095800-104115354	ECtrl	E3KO	OK	44.1878	63.7943	0.529778	1.75585	0.00205	0.0171154	yes	Cd59a	39.7481	48.3054	36.4103	67.3693	48.7583	47.6624
XLOC_005425	XLOC_005425	Cd68	11:69664212-69666153	ECtrl	E3KO	OK	16.4663	41.4019	1.33018	3.08132	5e-05	0.000724232	yes	Cd68	12.786	14.7159	17.8107	17.5524	40.2575	50.559
XLOC_014205	XLOC_014205	Cdc42ep3	17:79334024-79358022	ECtrl	E3KO	OK	7.88193	12.4572	0.660355	1.97665	0.0008	0.00791745	yes	Cdc42ep3	5.94756	6.88135	9.60121	14.4446	7.21553	10.0013
XLOC_010362	XLOC_010362	Cdca2	14:67676330-67715841	ECtrl	E3KO	OK	7.01791	2.09565	-1.74365	-2.06022	5e-05	0.000724232	yes	Cdca2	6.06002	4.3995	9.39479	1.11993	2.03795	2.41304
XLOC_026578	XLOC_026578	Cdca3	6:124829546-124833701	ECtrl	E3KO	OK	17.1167	5.60316	-1.61109	-3.69089	5e-05	0.000724232	yes	Cdca3	16.8284	11.4007	17.4309	3.16474	6.11203	5.21437
XLOC_015107	XLOC_015107	Cdca5	19:6084982-6091777	ECtrl	E3KO	OK	6.44929	3.2149	-1.00437	-2.31506	5e-05	0.000724232	yes	Cdca5	7.7671	5.28381	4.57135	1.88597	3.5648	2.76906
XLOC_016658	XLOC_016658	Cdca7	2:72476158-72486893	ECtrl	E3KO	OK	3.7357	1.25398	-1.57486	-1.96872	0.0002	0.00245954	yes	Cdca7	3.74804	4.21988	2.55667	0.545099	1.50678	1.20689
XLOC_031525	XLOC_031525	Cdh13	8:118283732-119324921	ECtrl	E3KO	OK	118.493	81.2724	-0.543968	-2.34791	5e-05	0.000724232	yes	Cdh13	104.167	99.5266	118.05	59.6025	83.4206	63.3167
XLOC_014740	XLOC_014740	Cdh2	18:16588876-16809246	ECtrl	E3KO	OK	6.07918	12.4628	1.03568	3.55072	5e-05	0.000724232	yes	Cdh2	3.11419	7.79695	6.50631	7.16323	11.8627	13.6287
XLOC_002973	XLOC_002973	Cdk1	10:69336634-69352938	ECtrl	E3KO	OK	65.1263	35.0575	-0.893515	-2.47657	5e-05	0.000724232	yes	Cdk1	80.384	52.5133	48.8462	33.4396	26.8042	28.8055
XLOC_001520	XLOC_001520	Cdk18	1:132113549-132139685	ECtrl	E3KO	OK	7.95301	14.3858	0.855075	2.80675	5e-05	0.000724232	yes	Cdk18	6.77283	5.68331	9.10737	9.76242	12.4017	13.9276
XLOC_012986	XLOC_012986	Cdkn1a	17:29090978-29100722	ECtrl	E3KO	OK	203.841	369.465	0.857994	3.73508	5e-05	0.000724232	yes	Cdkn1a	150.492	195.335	224.483	252.131	331.618	375.313
XLOC_023087	XLOC_023087	Cdkn2b	4:89306288-89311032	ECtrl	E3KO	OK	65.7193	115.715	0.816189	3.30127	5e-05	0.000724232	yes	Cdkn2b	55.3204	66.539	57.7844	106.328	91.3151	92.4843
XLOC_023249	XLOC_023249	Cdkn2c	4:109660875-109667189	ECtrl	E3KO	OK	8.6827	3.45617	-1.32897	-2.496	0.00015	0.00192134	yes	Cdkn2c	12.9421	5.60953	6.05947	1.2851	3.89143	3.87483
XLOC_009249	XLOC_009249	Cdkn3	14:46760540-46771525	ECtrl	E3KO	OK	13.0205	7.17083	-0.860573	-1.84734	0.00225	0.0184493	yes	Cdkn3	15.5887	13.4378	7.37987	8.07772	3.67244	6.39467
XLOC_017809	XLOC_017809	Celf2	2:6539704-7081313	ECtrl	E3KO	OK	14.4066	4.75556	-1.59904	-1.67244	0.00075	0.007507	yes	Celf2	12.5502	19.5487	11.3473	1.9112	5.09412	6.71129
XLOC_011455	XLOC_011455	Celsr1	15:85898757-86033777	ECtrl	E3KO	OK	5.3157	2.86505	-0.891702	-3.13426	5e-05	0.000724232	yes	Celsr1	6.10915	3.78114	4.2735	1.93893	2.58204	2.64911
XLOC_024024	XLOC_024024	Cenpa	5:30666776-30674827	ECtrl	E3KO	OK	49.4357	28.8661	-0.776177	-2.53094	5e-05	0.000724232	yes	Cenpa	57.8984	43.394	41.5488	31.102	22.803	21.0469
XLOC_020170	XLOC_020170	Cenpe	3:135212562-135273540	ECtrl	E3KO	OK	6.95662	3.9306	-0.823638	-3.17061	5e-05	0.000724232	yes	Cenpe	5.99242	7.00519	6.50459	3.14105	3.29465	3.5915
XLOC_001883	XLOC_001883	Cenpf	1:189640598-189688086	ECtrl	E3KO	OK	5.16531	1.80381	-1.5178	-1.44393	0.0002	0.00245954	yes	Cenpf	7.82011	4.19743	3.37476	1.14529	2.11898	1.93177
XLOC_035115	XLOC_035115	Cenpi	X:134308083-134362639	ECtrl	E3KO	OK	4.4288	2.34478	-0.917467	-2.19326	0.0001	0.00134402	yes	Cenpi	5.35721	4.92759	2.86175	1.64257	2.15515	2.41649
XLOC_000752	XLOC_000752	Cenpl	1:161070766-161086724	ECtrl	E3KO	OK	5.08225	2.50071	-1.02313	-1.93095	0.0023	0.0187672	yes	Cenpl	6.37408	4.46211	3.70732	1.3383	2.60656	2.63043
XLOC_031513	XLOC_031513	Cenpn	8:116921739-116941503	ECtrl	E3KO	OK	5.47132	2.12283	-1.3659	-2.81978	5e-05	0.000724232	yes	Cenpn	6.48971	4.39249	4.47694	0.443862	2.90303	2.26582
XLOC_015358	XLOC_015358	Cep55	19:38055024-38074425	ECtrl	E3KO	OK	12.5048	4.17463	-1.58276	-4.73016	5e-05	0.000724232	yes	Cep55	15.1424	10.3412	9.8574	3.69037	3.27435	3.70472
XLOC_002852	XLOC_002852	Cep57l1	10:41718839-41809607	ECtrl	E3KO	OK	3.70598	2.03054	-0.867993	-1.92462	0.00125	0.0114398	yes	Cep57l1	4.13774	3.54956	2.70846	1.5776	1.80734	1.83484
XLOC_031406	XLOC_031406	Ces2b	8:104831571-104840093	ECtrl	E3KO	OK	2.02764	3.80575	0.908384	1.76681	0.00495	0.0345452	yes	Ces2b	2.15871	1.84313	1.45132	3.98001	2.3621	3.10138
XLOC_031409	XLOC_031409	Ces2e	8:104926259-104934672	ECtrl	E3KO	OK	5.08378	18.9471	1.898	5.59921	5e-05	0.000724232	yes	Ces2e	2.78858	4.64691	6.40371	14.632	15.3019	18.025
XLOC_031411	XLOC_031411	Ces2g	8:104961717-104969537	ECtrl	E3KO	OK	10.5578	35.2091	1.73764	6.27861	5e-05	0.000724232	yes	Ces2g	4.71475	12.4642	11.9917	30.3086	28.5421	31.5707
XLOC_025838	XLOC_025838	Cftr	6:18170686-18322768	ECtrl	E3KO	OK	3.58132	1.53188	-1.22519	-3.43748	5e-05	0.000724232	yes	Cftr	2.94344	4.61172	2.8464	1.42914	1.53212	1.06235
XLOC_033633	XLOC_033633	Cgnl1	9:71626508-71771602	ECtrl	E3KO	OK	65.5221	114.779	0.808806	2.99151	5e-05	0.000724232	yes	Cgnl1	31.0783	48.4621	52.3744	60.2756	79.0666	78.093
XLOC_012133	XLOC_012133	Chaf1b	16:93883900-93906115	ECtrl	E3KO	OK	5.28084	2.87981	-0.874794	-1.87392	0.00115	0.0106752	yes	Chaf1b	6.50478	3.21568	4.68787	1.17112	3.00788	3.20856
XLOC_017204	XLOC_017204	Chchd5	2:129129699-129134134	ECtrl	E3KO	OK	5.33281	2.32669	-1.19662	-1.96202	0.00275	0.0216705	yes	Chchd5	5.45443	4.77932	5.04562	0.259406	3.37877	3.0332
XLOC_019487	XLOC_019487	Chmp4c	3:10366906-10391005	ECtrl	E3KO	OK	1.491	2.86106	0.94027	1.68279	0.00515	0.0356208	yes	Chmp4c	1.55432	1.58925	1.06218	3.73535	1.64945	1.77
XLOC_033737	XLOC_033737	Chst2	9:95400928-95407270	ECtrl	E3KO	OK	7.25983	13.5139	0.896435	3.37514	5e-05	0.000724232	yes	Chst2	6.86674	8.35018	5.7194	7.67196	14.555	13.2151
XLOC_034309	XLOC_034309	Chst7	X:20059559-20097521	ECtrl	E3KO	OK	6.71614	11.0099	0.713092	1.91808	0.0012	0.0110638	yes	Chst7	5.53157	8.40955	3.87981	10.0917	7.84776	9.1817
XLOC_033503	XLOC_033503	Cib2	9:54538983-54560218	ECtrl	E3KO	OK	3.7593	1.97526	-0.928421	-1.62746	0.0066	0.0431998	yes	Cib2	5.12808	2.32908	3.0113	0.304901	2.22746	2.58632
XLOC_018916	XLOC_018916	Ckap2l	2:129246375-129297212	ECtrl	E3KO	OK	8.8355	4.58207	-0.947313	-3.05872	5e-05	0.000724232	yes	Ckap2l	10.6045	8.306	6.18631	4.64075	3.465	3.6451
XLOC_033072	XLOC_033072	Clasp2	9:113812585-113919697	ECtrl	E3KO	OK	11.8099	8.32445	-0.504572	-1.5951	0.0054	0.0369354	yes	Clasp2	12.4514	11.9259	9.40205	5.81248	8.59529	7.26319
XLOC_021034	XLOC_021034	Clca1	3:144729676-144760977	ECtrl	E3KO	OK	11.1638	21.5269	0.947312	3.66843	5e-05	0.000724232	yes	Clca1	7.29668	11.3951	12.9484	18.5324	17.8042	19.7512
XLOC_021041	XLOC_021041	Clca5	3:145070264-145099104	ECtrl	E3KO	OK	39.1942	76.9613	0.973493	4.16839	5e-05	0.000724232	yes	Clca5	23.6306	39.4718	46.5592	52.1097	73.9927	73.3273
XLOC_011766	XLOC_011766	Cldn5	16:18776846-18778260	ECtrl	E3KO	OK	240.764	136.146	-0.822462	-3.48603	5e-05	0.000724232	yes	Cldn5	275.819	167.273	201.085	97.4822	128.613	114.494
XLOC_007074	XLOC_007074	Clec14a	12:58264719-58269258	ECtrl	E3KO	OK	17.0451	30.5858	0.843505	3.47613	5e-05	0.000724232	yes	Clec14a	16.2629	18.0855	15.6488	27.456	25.5487	27.8993
XLOC_026557	XLOC_026557	Clec4n	6:123229842-123247021	ECtrl	E3KO	OK	3.86269	24.0878	2.64063	3.99718	5e-05	0.000724232	yes	Clec4n	1.60514	4.94076	4.2584	35.5085	10.3431	14.1782
XLOC_034659	XLOC_034659	Cnga2	X:71991848-72010218	ECtrl	E3KO	OK	0.118776	11.9891	6.65733	4.19238	5e-05	0.000724232	yes	Cnga2	0.010977	0.21588	0.0985404	28.3826	0.181572	0.204498
XLOC_021653	XLOC_021653	Cntln	4:84884308-85131921	ECtrl	E3KO	OK	5.10279	2.72674	-0.904108	-1.85595	0.0029	0.0226265	yes	Cntln	5.8736	5.25835	3.7614	2.60313	2.37638	2.07032
XLOC_021429	XLOC_021429	Col15a1	4:47197486-47313167	ECtrl	E3KO	OK	7.26933	3.69263	-0.977173	-1.88629	0.0009	0.00873141	yes	Col15a1	6.39325	5.91551	8.12463	3.98536	2.79669	2.65148
XLOC_025793	XLOC_025793	Col1a2	6:4504813-4541543	ECtrl	E3KO	OK	3.19908	0.643612	-2.31339	-4.07428	5e-05	0.000724232	yes	Col1a2	0.681872	4.42173	3.47831	0.146062	0.844524	0.648257
XLOC_026892	XLOC_026892	Copg2	6:30723546-30896794	ECtrl	E3KO	OK	82.9902	191.632	1.20733	2.81993	5e-05	0.000724232	yes	Copg2	70.2773	90.4437	75.5346	166.887	145.944	181.816
XLOC_007908	XLOC_007908	Cplx2	13:54371348-54383917	ECtrl	E3KO	OK	7.88787	4.18466	-0.914525	-3.05963	5e-05	0.000724232	yes	Cplx2	7.21916	6.64518	7.79289	2.42318	4.78797	3.51875
XLOC_031180	XLOC_031180	Crlf1	8:70493157-70504081	ECtrl	E3KO	OK	4.67277	16.4618	1.81677	2.18061	0.00065	0.00667132	yes	Crlf1	4.05704	3.53857	5.39903	11.8803	11.866	18.0724
XLOC_024099	XLOC_024099	Crmp1	5:37242079-37336894	ECtrl	E3KO	OK	33.4809	16.5575	-1.01586	-3.34852	5e-05	0.000724232	yes	Crmp1	28.8834	22.0502	40.1679	11.9608	17.6831	12.297
XLOC_032612	XLOC_032612	Cryab	9:50752757-50756633	ECtrl	E3KO	OK	4.40392	17.6714	2.00455	4.42825	5e-05	0.000724232	yes	Cryab	2.63661	3.41673	5.97258	13.5577	12.3483	18.6649
XLOC_020258	XLOC_020258	Cryz	3:154576519-154623182	ECtrl	E3KO	OK	18.3904	10.4173	-0.81997	-2.39362	5e-05	0.000724232	yes	Cryz	22.3708	14.9383	14.7811	7.4331	10.5258	8.94105
XLOC_020867	XLOC_020867	Csf1	3:107741047-107760469	ECtrl	E3KO	OK	28.4152	56.4234	0.989632	3.38763	5e-05	0.000724232	yes	Csf1	16.7229	31.1269	29.5854	53.4395	40.6323	48.9426
XLOC_004464	XLOC_004464	Csf3	11:98701262-98703629	ECtrl	E3KO	OK	0.876154	3.82199	2.12507	2.95074	5e-05	0.000724232	yes	Csf3	1.54806	0.779918	0.0394451	1.91248	2.64095	5.26242
XLOC_002530	XLOC_002530	Csrp2	10:110920176-110939599	ECtrl	E3KO	OK	18.214	8.45782	-1.10669	-2.76359	5e-05	0.000724232	yes	Csrp2	21.9775	14.5873	13.2258	4.71449	9.08444	7.78681
XLOC_033101	XLOC_033101	Ctdspl	9:118926452-119043998	ECtrl	E3KO	OK	21.3095	11.5716	-0.880913	-3.37178	5e-05	0.000724232	yes	Ctdspl	24.3333	17.5663	18.2514	7.9267	11.261	10.8481
XLOC_002036	XLOC_002036	Ctgf	10:24549440-24598683	ECtrl	E3KO	OK	165.301	320.051	0.953204	4.09152	5e-05	0.000724232	yes	Ctgf	150.391	194.99	118.559	315.913	236.209	264.148
XLOC_008638	XLOC_008638	Ctla2a	13:60934154-60936625	ECtrl	E3KO	OK	1054.41	1697.38	0.686878	2.71254	5e-05	0.000724232	yes	Ctla2a	771.189	1212.92	984.615	1761.84	1373.39	1218.67
XLOC_008636	XLOC_008636	Ctla2b	13:60895350-60897447	ECtrl	E3KO	OK	320.765	585.078	0.867113	3.65693	5e-05	0.000724232	yes	Ctla2b	216.213	357.512	311.934	551.495	481.652	450.13
XLOC_023376	XLOC_023376	Ctps	4:120539867-120570276	ECtrl	E3KO	OK	29.5109	44.8549	0.604018	2.37913	5e-05	0.000724232	yes	Ctps	25.7532	30.018	25.6653	47.0411	33.0039	33.8157
XLOC_032881	XLOC_032881	Ctsh	9:90054151-90076089	ECtrl	E3KO	OK	80.0388	145.241	0.859674	3.23414	5e-05	0.000724232	yes	Ctsh	74.3306	81.3691	69.5002	125.607	116.037	132.449
XLOC_019926	XLOC_019926	Ctss	3:95526785-95556403	ECtrl	E3KO	OK	15.4694	41.1817	1.41258	4.63278	5e-05	0.000724232	yes	Ctss	4.08399	17.4261	20.8919	35.242	28.0498	41.1224
XLOC_031362	XLOC_031362	Cx3cl1	8:94772008-94782423	ECtrl	E3KO	OK	2.73203	4.38327	0.682036	1.60517	0.00335	0.0254018	yes	Cx3cl1	2.28796	2.04803	3.26921	5.53249	2.76024	2.50784
XLOC_012058	XLOC_012058	Cxadr	16:78301495-78359785	ECtrl	E3KO	OK	18.4339	9.75167	-0.918638	-2.42437	5e-05	0.000724232	yes	Cxadr	21.9491	16.7272	14.6375	8.22805	9.31202	8.08277
XLOC_029479	XLOC_029479	Cxcl17	7:25400052-25412886	ECtrl	E3KO	OK	5.30175	2.64788	-1.00163	-1.58336	0.0065	0.0426884	yes	Cxcl17	7.06059	2.00564	5.38197	2.12516	1.90713	2.62941
XLOC_035833	XLOC_035833	Cxx1b	X:53669177-53670408	ECtrl	E3KO	OK	13.9673	29.5063	1.07896	3.10053	5e-05	0.000724232	yes	Cxx1b	12.247	10.2253	15.027	25.3814	23.0868	24.4146
XLOC_034513	XLOC_034513	Cxx1c	X:53577086-53609132	ECtrl	E3KO	OK	2.80249	8.73843	1.64066	1.61834	0.00395	0.0289109	yes	Cxx1c	2.02523	2.52347	3.25232	4.82028	10.3315	7.41699
XLOC_014206	XLOC_014206	Cyp1b1	17:79706952-79715041	ECtrl	E3KO	OK	2.98414	9.67614	1.69712	5.20935	5e-05	0.000724232	yes	Cyp1b1	0.345022	4.02769	4.15094	4.54179	8.45993	12.8712
XLOC_013241	XLOC_013241	Cyp39a1	17:43667424-43751431	ECtrl	E3KO	OK	5.25724	3.03274	-0.793685	-2.22219	0.0002	0.00245954	yes	Cyp39a1	5.76439	4.88367	4.49328	2.1866	2.83325	2.94652
XLOC_023285	XLOC_023285	Cyp4b1	4:115624724-115647709	ECtrl	E3KO	OK	28.3929	14.649	-0.954728	-2.94643	5e-05	0.000724232	yes	Cyp4b1	29.3956	25.1748	22.6076	10.2033	13.5371	13.4879
XLOC_024858	XLOC_024858	Cyp51	5:4081144-4104746	ECtrl	E3KO	OK	3.95274	11.3788	1.52543	2.29349	0.00015	0.00192134	yes	Cyp51	4.54475	2.98502	3.66975	13.1321	5.5356	10.7847
XLOC_021042	XLOC_021042	Cyr61	3:145646970-145649985	ECtrl	E3KO	OK	40.5725	63.3257	0.642288	2.57024	5e-05	0.000724232	yes	Cyr61	36.3046	40.7499	33.4112	58.6218	44.9068	55.6432
XLOC_018206	XLOC_018206	Cytip	2:58129136-58195532	ECtrl	E3KO	OK	0.163065	2.24586	3.78375	1.41046	5e-05	0.000724232	yes	Cytip	0.188609	0.202465	0.0557516	4.38755	0.377491	0.616903
XLOC_010458	XLOC_010458	Dach1	14:97786852-98169765	ECtrl	E3KO	OK	2.43947	1.20707	-1.01506	-2.43657	5e-05	0.000724232	yes	Dach1	1.90104	3.40339	1.93998	0.913233	1.02588	1.25278
XLOC_024784	XLOC_024784	Daglb	5:143464492-143504442	ECtrl	E3KO	OK	14.9712	9.88388	-0.599037	-1.98452	0.0009	0.00873141	yes	Daglb	14.8626	12.161	14.1734	4.43878	11.2017	9.89577
XLOC_032757	XLOC_032757	Dapk2	9:66158222-66272242	ECtrl	E3KO	OK	25.1612	39.0956	0.635804	2.30982	0.0001	0.00134402	yes	Dapk2	15.4432	28.155	25.3203	27.4533	37.2352	34.4758
XLOC_022978	XLOC_022978	Dbc1	4:68761513-68954397	ECtrl	E3KO	OK	1.55807	3.24717	1.05942	2.25217	0.00015	0.00192134	yes	Dbc1	1.49517	1.68694	0.955435	2.4764	2.50729	3.00624
XLOC_022593	XLOC_022593	Decr1	4:15917239-15945507	ECtrl	E3KO	OK	4.46135	6.98178	0.646115	1.87982	0.0006	0.0062413	yes	Decr1	3.00782	5.1238	4.73083	8.34557	4.10336	5.66475
XLOC_026947	XLOC_026947	Dennd2a	6:39462377-39557867	ECtrl	E3KO	OK	8.06118	5.10651	-0.658654	-1.94568	0.0002	0.00245954	yes	Dennd2a	8.23647	6.93031	6.6178	3.61673	5.1034	4.35241
XLOC_020273	XLOC_020273	Depdc1a	3:159495432-159529955	ECtrl	E3KO	OK	3.84814	0.82374	-2.2239	-3.58402	5e-05	0.000724232	yes	Depdc1a	5.74988	4.95742	1.3261	0.0893299	0.826682	1.3485
XLOC_021810	XLOC_021810	Dhcr24	4:106561037-106589113	ECtrl	E3KO	OK	4.49336	7.34546	0.709059	2.03985	0.0006	0.0062413	yes	Dhcr24	4.15548	3.41296	4.55046	4.98524	5.81213	7.61908
XLOC_010447	XLOC_010447	Diap3	14:86655366-87141224	ECtrl	E3KO	OK	7.01499	4.58196	-0.614476	-2.00727	0.0004	0.00443257	yes	Diap3	6.63364	7.84626	6.1099	3.66301	3.56061	4.73269
XLOC_033476	XLOC_033476	Dixdc1	9:50662751-50739517	ECtrl	E3KO	OK	4.82933	1.87357	-1.36603	-1.8438	0.0003	0.00348276	yes	Dixdc1	4.95063	2.87708	5.27051	0.957174	1.91077	1.80369
XLOC_020160	XLOC_020160	Dkk2	3:132085291-132180293	ECtrl	E3KO	OK	13.6117	4.04548	-1.75047	-5.79128	5e-05	0.000724232	yes	Dkk2	17.1795	11.2467	10.2482	3.1392	4.44576	2.87642
XLOC_010132	XLOC_010132	Dlgap5	14:47387778-47418407	ECtrl	E3KO	OK	10.8007	5.59361	-0.949266	-2.13327	0.0005	0.00535591	yes	Dlgap5	12.5459	9.77563	6.94749	5.73797	4.60764	4.47176
XLOC_017100	XLOC_017100	Dll4	2:119321186-119335962	ECtrl	E3KO	OK	9.39339	5.42706	-0.791474	-2.42097	5e-05	0.000724232	yes	Dll4	9.66682	6.51899	9.68412	3.12646	5.23642	5.52745
XLOC_001328	XLOC_001328	Dock10	1:80501072-80758553	ECtrl	E3KO	OK	2.82836	1.4416	-0.972298	-2.8974	5e-05	0.000724232	yes	Dock10	2.58691	2.42209	2.9648	0.684212	1.69739	1.39938
XLOC_015289	XLOC_015289	Dock8	19:24999528-25202432	ECtrl	E3KO	OK	5.79248	13.2441	1.1931	4.5448	5e-05	0.000724232	yes	Dock8	2.81752	6.80793	6.29303	8.77829	11.7542	13.2473
XLOC_017320	XLOC_017320	Dtd1	2:144599896-144768758	ECtrl	E3KO	OK	12.5601	8.07514	-0.637291	-1.69657	0.0028	0.0219934	yes	Dtd1	14.161	10.6594	8.90863	4.36582	8.54232	7.55974
XLOC_006270	XLOC_006270	Dtnb	12:3572380-3781796	ECtrl	E3KO	OK	6.14751	11.0147	0.84136	1.81691	0.00055	0.00580945	yes	Dtnb	4.94108	5.98706	6.05222	8.59485	8.75809	10.9647
XLOC_025500	XLOC_025500	Dtx1	5:120680201-120711927	ECtrl	E3KO	OK	5.58008	0.534509	-3.384	-4.67691	5e-05	0.000724232	yes	Dtx1	8.61264	1.61786	5.12248	0.279555	0.872463	0.215289
XLOC_027635	XLOC_027635	Dusp16	6:134715472-134792625	ECtrl	E3KO	OK	8.10047	5.53381	-0.549734	-1.51957	0.0044	0.0314835	yes	Dusp16	7.2762	7.67781	6.76953	5.98692	5.4436	2.4388
XLOC_005973	XLOC_005973	Dusp3	11:101971142-101992264	ECtrl	E3KO	OK	61.9029	35.702	-0.794	-2.84519	5e-05	0.000724232	yes	Dusp3	68.4926	53.2973	52.8332	28.5244	34.2971	28.6818
XLOC_034682	XLOC_034682	Dusp9	X:73639418-73643514	ECtrl	E3KO	OK	3.13887	1.17433	-1.41841	-2.64133	0.0001	0.00134402	yes	Dusp9	3.02949	2.51783	2.90302	0.385489	1.43641	1.18186
XLOC_010512	XLOC_010512	Dzip1	14:118875519-118925314	ECtrl	E3KO	OK	4.48813	7.67087	0.773275	2.48784	0.0001	0.00134402	yes	Dzip1	2.79204	4.2988	5.50474	6.09969	6.70587	6.92371
XLOC_030678	XLOC_030678	Ebf3	7:137193672-137314445	ECtrl	E3KO	OK	3.67252	1.5768	-1.21977	-3.07072	5e-05	0.000724232	yes	Ebf3	3.75679	3.44925	3.41214	0.531446	1.64421	1.99826
XLOC_010311	XLOC_010311	Ebpl	14:61339762-61360445	ECtrl	E3KO	OK	7.24313	4.00664	-0.854218	-2.14266	0.0004	0.00443257	yes	Ebpl	7.628	5.39494	7.23654	1.68827	4.01942	4.68454
XLOC_020729	XLOC_020729	Ecm1	3:95734146-95739569	ECtrl	E3KO	OK	64.0744	103.973	0.698383	2.25138	0.0002	0.00245954	yes	Ecm1	27.8859	53.4725	85.9722	68.5338	86.2969	92.6257
XLOC_007845	XLOC_007845	Edn1	13:42301269-42307989	ECtrl	E3KO	OK	94.653	193.523	1.03179	4.3881	5e-05	0.000724232	yes	Edn1	75.7047	119.27	72.6282	186.31	141.408	163.693
XLOC_010483	XLOC_010483	Ednrb	14:103814624-103844173	ECtrl	E3KO	OK	78.1514	131.397	0.749586	3.30678	5e-05	0.000724232	yes	Ednrb	80.0795	65.1668	82.8191	83.3777	123.523	143.168
XLOC_030205	XLOC_030205	Eed	7:89954655-89981848	ECtrl	E3KO	OK	22.2434	33.5231	0.591779	2.15738	0.0001	0.00134402	yes	Eed	24.3371	25.1611	14.5284	39.4752	22.8814	23.6
XLOC_008499	XLOC_008499	Eef1e1	13:38645697-38659028	ECtrl	E3KO	OK	12.9683	20.8636	0.685997	1.96203	0.0007	0.00709513	yes	Eef1e1	11.7697	8.27405	16.8346	28.1296	13.2146	12.3062
XLOC_028838	XLOC_028838	Eef2k	7:120842830-120907219	ECtrl	E3KO	OK	8.65795	5.14106	-0.751962	-2.06241	0.00015	0.00192134	yes	Eef2k	7.65738	7.35557	7.64786	1.95091	6.05727	5.05129
XLOC_003583	XLOC_003583	Efemp1	11:28853203-28926743	ECtrl	E3KO	OK	1.06298	4.44199	2.06309	2.78097	5e-05	0.000724232	yes	Efemp1	0.410253	1.15639	1.45021	0.298742	4.19186	8.10238
XLOC_000062	XLOC_000062	Efhc1	1:20951625-20990838	ECtrl	E3KO	OK	1.51578	2.75798	0.86355	1.60113	0.00475	0.0334549	yes	Efhc1	2.058	1.18686	0.979825	3.70398	1.67108	1.57226
XLOC_014502	XLOC_014502	Eif1a	18:46597703-46610225	ECtrl	E3KO	OK	30.597	60.1736	0.975739	3.31177	5e-05	0.000724232	yes	Eif1a	24.6066	34.4417	30.1323	62.6399	44.8419	49.887
XLOC_000251	XLOC_000251	Eif4a-ps4	1:60703917-60705656	ECtrl	E3KO	OK	5.56913	19.2164	1.78682	4.25837	5e-05	0.000724232	yes	Eif4a-ps4	4.60813	5.67621	5.07163	37.7262	4.6881	4.31607
XLOC_011818	XLOC_011818	Eif4a2	16:23107443-23127737	ECtrl	E3KO	OK	166.829	599.684	1.84584	8.86524	5e-05	0.000724232	yes	Eif4a2	173.583	181.307	154.638	170.233	157.582	149.362
XLOC_019540	XLOC_019540	Eif5a2	3:28781310-28798846	ECtrl	E3KO	OK	10.0348	5.46953	-0.875528	-3.09877	5e-05	0.000724232	yes	Eif5a2	10.6135	9.53577	9.95286	2.78197	5.96168	6.16652
XLOC_020147	XLOC_020147	Elovl6	3:129532385-129638495	ECtrl	E3KO	OK	2.97704	4.21051	0.500116	1.60422	0.00575	0.0388058	yes	Elovl6	2.72464	3.43747	2.40623	4.27991	3.39857	3.26916
XLOC_020181	XLOC_020181	Emcn	3:137341066-137432185	ECtrl	E3KO	OK	1059.78	1743.82	0.718479	2.69551	5e-05	0.000724232	yes	Emcn	821.993	1094.57	1033.09	1556.62	1452.13	1476.57
XLOC_011518	XLOC_011518	Endou	15:97711018-97731405	ECtrl	E3KO	OK	0.819389	2.09116	1.35169	2.32513	0.00025	0.00297984	yes	Endou	0.353199	1.09562	0.761558	2.22823	1.33667	1.68889
XLOC_002782	XLOC_002782	Enpp3	10:24773813-24836195	ECtrl	E3KO	OK	8.66238	5.88311	-0.558183	-1.75913	0.00225	0.0184493	yes	Enpp3	10.301	6.55477	7.57581	5.13244	4.70852	5.27956
XLOC_015376	XLOC_015376	Entpd1	19:40612365-40741602	ECtrl	E3KO	OK	32.6229	103.692	1.66834	1.95152	5e-05	0.000724232	yes	Entpd1	52.9678	90.0307	59.5763	98.6223	75.2511	122.213
XLOC_010390	XLOC_010390	Epb4.9	14:70602183-70636048	ECtrl	E3KO	OK	31.1504	21.9535	-0.504798	-2.01801	0.0007	0.00709513	yes	Epb4.9	30.6793	21.2744	32.9964	21.2374	17.8666	15.3339
XLOC_033777	XLOC_033777	Ephb1	9:101922127-102354694	ECtrl	E3KO	OK	25.0959	12.8337	-0.96752	-3.82494	5e-05	0.000724232	yes	Ephb1	24.6426	19.5905	23.8443	8.14215	13.8621	10.5425
XLOC_036198	XLOC_036198	Ercc6l	X:102141715-102157091	ECtrl	E3KO	OK	2.42173	1.15643	-1.06636	-2.69828	5e-05	0.000724232	yes	Ercc6l	2.87931	2.52078	1.57016	0.949306	0.891063	1.16697
XLOC_031634	XLOC_031634	Erich1	8:14027564-14090327	ECtrl	E3KO	OK	8.05734	12.5155	0.635346	1.83686	0.00145	0.0129287	yes	Erich1	8.48686	6.1672	7.59474	15.7371	7.73782	7.50176
XLOC_009650	XLOC_009650	Esd	14:74732296-74750765	ECtrl	E3KO	OK	236.85	413.163	0.802734	2.91903	5e-05	0.000724232	yes	Esd	149.743	247.387	262.052	329.08	375.325	352.103
XLOC_008200	XLOC_008200	Esm1	13:113171607-113225908	ECtrl	E3KO	OK	43.518	92.7331	1.09147	4.52602	5e-05	0.000724232	yes	Esm1	29.0053	54.4095	42.0366	74.8348	76.5823	90.1075
XLOC_001935	XLOC_001935	Esr1	10:4611592-5005614	ECtrl	E3KO	OK	0.691053	3.16898	2.19715	2.95367	5e-05	0.000724232	yes	Esr1	0.826162	0.561432	0.47428	6.75699	0.422542	0.492881
XLOC_006620	XLOC_006620	Esrrb	12:86361116-86521628	ECtrl	E3KO	OK	0.392566	3.84862	3.29333	3.53831	5e-05	0.000724232	yes	Esrrb	0.748871	0.252877	0.0561349	8.53298	0.308283	0.32801
XLOC_027951	XLOC_027951	Exoc3l2	7:19489055-19496760	ECtrl	E3KO	OK	5.52122	12.5185	1.18101	3.26084	5e-05	0.000724232	yes	Exoc3l2	3.94681	5.55858	5.52024	8.81818	10.2942	12.5701
XLOC_033152	XLOC_033152	Exosc7	9:123113214-123136129	ECtrl	E3KO	OK	10.2903	6.24588	-0.720308	-1.65507	0.0052	0.0358848	yes	Exosc7	12.1841	7.72795	7.63108	2.51414	6.65523	6.61668
XLOC_026991	XLOC_026991	Ezh2	6:47530273-47595341	ECtrl	E3KO	OK	13.1735	8.26162	-0.673137	-2.06482	0.00025	0.00297984	yes	Ezh2	13.282	11.488	13.2923	5.5673	8.50715	7.55819
XLOC_008802	XLOC_008802	F2rl1	13:95511731-95525240	ECtrl	E3KO	OK	43.0477	12.9518	-1.73279	-6.36506	5e-05	0.000724232	yes	F2rl1	46.9133	37.6269	36.2617	11.4989	13.9757	7.74599
XLOC_031230	XLOC_031230	F2rl3	8:72761879-72763874	ECtrl	E3KO	OK	5.86987	12.1024	1.04389	2.62364	5e-05	0.000724232	yes	F2rl3	2.04656	5.73297	8.15919	9.30421	9.57492	11.37
XLOC_005560	XLOC_005560	Fam101b	11:76019193-76027782	ECtrl	E3KO	OK	19.4123	38.0393	0.970521	3.93062	5e-05	0.000724232	yes	Fam101b	17.0582	18.1624	19.404	31.3514	27.3118	38.5925
XLOC_006375	XLOC_006375	Fam110c	12:31073967-31079937	ECtrl	E3KO	OK	14.6711	23.6727	0.690245	2.53463	5e-05	0.000724232	yes	Fam110c	9.58348	16.989	14.4621	21.8231	17.9257	20.5749
XLOC_026982	XLOC_026982	Fam115c	6:42623018-42645254	ECtrl	E3KO	OK	1.90262	3.36169	0.821199	1.99645	0.002	0.0167846	yes	Fam115c	1.18434	2.25333	1.80005	2.95308	2.78611	2.87782
XLOC_010599	XLOC_010599	Fam134b	15:25843263-25973687	ECtrl	E3KO	OK	17.8827	7.65177	-1.2247	-4.17508	5e-05	0.000724232	yes	Fam134b	24.6461	15.5787	11.3647	4.68003	7.31468	7.31848
XLOC_009585	XLOC_009585	Fam167a	14:63436393-63465498	ECtrl	E3KO	OK	3.25816	1.12106	-1.53919	-3.33402	5e-05	0.000724232	yes	Fam167a	4.21366	2.0397	2.88892	1.10979	1.02785	0.720736
XLOC_026925	XLOC_026925	Fam180a	6:35312745-35326141	ECtrl	E3KO	OK	8.64393	1.003	-3.10737	-5.21013	5e-05	0.000724232	yes	Fam180a	14.5805	4.04792	5.87069	0.0642918	0.910802	1.65522
XLOC_015752	XLOC_015752	Fam189a2	19:23972750-24031019	ECtrl	E3KO	OK	13.2009	6.11562	-1.11006	-3.31313	5e-05	0.000724232	yes	Fam189a2	16.351	8.8347	10.2383	3.59432	6.26325	5.58228
XLOC_019805	XLOC_019805	Fam189b	3:89183142-89189295	ECtrl	E3KO	OK	4.09139	1.85169	-1.14375	-2.00501	5e-05	0.000724232	yes	Fam189b	3.87317	2.95478	4.35319	0.674652	2.04373	2.05605
XLOC_004066	XLOC_004066	Fam64a	11:72042031-72047370	ECtrl	E3KO	OK	11.9623	4.34853	-1.45989	-3.53648	5e-05	0.000724232	yes	Fam64a	16.7903	8.12359	6.97922	2.8277	3.98953	4.16558
XLOC_000600	XLOC_000600	Fam72a	1:131527902-131539872	ECtrl	E3KO	OK	2.54172	5.95825	1.22908	2.81991	5e-05	0.000724232	yes	Fam72a	2.91125	2.1255	2.55911	10.5174	2.62086	2.25629
XLOC_017516	XLOC_017516	Fam83d	2:158768092-158786637	ECtrl	E3KO	OK	8.4116	4.20117	-1.00159	-2.61399	5e-05	0.000724232	yes	Fam83d	7.18203	8.33354	7.52432	2.629	4.59772	3.56029
XLOC_006930	XLOC_006930	Fam84a	12:14147598-14152038	ECtrl	E3KO	OK	2.66159	6.2375	1.22868	3.19025	5e-05	0.000724232	yes	Fam84a	3.10352	2.86897	1.59944	4.12048	5.24006	6.90233
XLOC_035424	XLOC_035424	Fancb	X:164980591-164997272	ECtrl	E3KO	OK	4.4628	2.61974	-0.768522	-2.00072	0.0007	0.00709513	yes	Fancb	4.68747	4.81145	3.52595	2.3799	2.42981	2.09202
XLOC_009749	XLOC_009749	Farp1	14:121035199-121283744	ECtrl	E3KO	OK	17.8432	11.695	-0.60948	-2.21253	0.0001	0.00134402	yes	Farp1	15.7471	13.6777	19.8748	9.41831	11.0039	9.29152
XLOC_031064	XLOC_031064	Fat1	8:44950207-45052257	ECtrl	E3KO	OK	3.83881	9.20455	1.26169	4.76473	5e-05	0.000724232	yes	Fat1	1.24321	4.36315	4.92856	5.69061	7.55212	10.238
XLOC_010896	XLOC_010896	Fbln1	15:85205948-85286535	ECtrl	E3KO	OK	3.43775	1.54414	-1.15466	-1.86468	0.0016	0.0140202	yes	Fbln1	3.80218	2.25251	3.24583	0.0549637	1.9569	1.96653
XLOC_018868	XLOC_018868	Fbn1	2:125300593-125507993	ECtrl	E3KO	OK	8.91398	4.31526	-1.04662	-3.31263	5e-05	0.000724232	yes	Fbn1	9.12781	7.01215	8.15072	3.56263	3.78243	3.54987
XLOC_001756	XLOC_001756	Fcer1g	1:171229571-171234365	ECtrl	E3KO	OK	18.0045	37.959	1.07608	2.80663	5e-05	0.000724232	yes	Fcer1g	9.46178	20.2453	19.5665	26.4621	32.5635	37.3938
XLOC_001752	XLOC_001752	Fcgr3	1:171051173-171064935	ECtrl	E3KO	OK	2.96909	9.29452	1.64636	3.50493	5e-05	0.000724232	yes	Fcgr3	0.76553	3.84117	3.46653	7.21486	7.0518	9.58235
XLOC_012356	XLOC_012356	Fgf12	16:28160119-28445227	ECtrl	E3KO	OK	7.79285	4.86984	-0.678277	-2.14773	0.00035	0.00396199	yes	Fgf12	7.88463	8.80536	6.85445	3.39813	5.34312	4.40847
XLOC_023956	XLOC_023956	Fgl2	5:21292960-21424677	ECtrl	E3KO	OK	24.3708	4.64602	-2.39108	-7.59152	5e-05	0.000724232	yes	Fgl2	44.2926	16.1209	14.481	6.10817	3.26279	2.87043
XLOC_034558	XLOC_034558	Fhl1	X:56731786-56793346	ECtrl	E3KO	OK	125.816	40.3612	-1.64027	-6.57163	5e-05	0.000724232	yes	Fhl1	148	103.041	104.557	30.4536	45.4272	28.251
XLOC_004909	XLOC_004909	Fignl1	11:11787430-11808962	ECtrl	E3KO	OK	6.4231	2.0541	-1.64477	-3.24034	5e-05	0.000724232	yes	Fignl1	7.53202	6.08155	4.80261	0.958251	2.27685	2.17306
XLOC_019238	XLOC_019238	Fitm2	2:163466378-163473003	ECtrl	E3KO	OK	5.66164	8.56927	0.597952	1.94931	0.0008	0.00791745	yes	Fitm2	5.409	5.27524	5.23766	5.2519	8.2747	8.62121
XLOC_006904	XLOC_006904	Fkbp1b	12:4833174-4841595	ECtrl	E3KO	OK	9.3996	3.41955	-1.45879	-2.71402	5e-05	0.000724232	yes	Fkbp1b	11.0858	6.9394	7.4872	0.415211	4.10388	4.25272
XLOC_018336	XLOC_018336	Fkbp7	2:76663043-76673116	ECtrl	E3KO	OK	40.1788	60.2977	0.585668	2.08549	0.0005	0.00535591	yes	Fkbp7	39.5233	38.4533	35.1645	45.0333	55.2838	54.1356
XLOC_025756	XLOC_025756	Flt1	5:147561603-147726011	ECtrl	E3KO	OK	5.00557	13.9806	1.48182	3.19479	5e-05	0.000724232	yes	Flt1	2.43809	5.04198	6.628	9.32001	9.60572	11.7925
XLOC_017050	XLOC_017050	Fmn1	2:113327735-113716767	ECtrl	E3KO	OK	3.80288	10.6292	1.48287	2.60277	5e-05	0.000724232	yes	Fmn1	1.86324	3.71369	4.67373	8.26135	9.38866	11.7173
XLOC_025015	XLOC_025015	Fndc4	5:31292254-31295877	ECtrl	E3KO	OK	2.6617	0.782884	-1.76548	-2.51532	0.0004	0.00443257	yes	Fndc4	3.317	1.71891	2.2154	0.0500795	1.12744	0.86317
XLOC_025825	XLOC_025825	Foxp2	6:14901348-15441977	ECtrl	E3KO	OK	8.75471	4.30518	-1.02399	-1.64449	0.00075	0.007507	yes	Foxp2	8.75521	7.90553	8.95593	4.27902	4.07506	3.3092
XLOC_020093	XLOC_020093	Frrs1	3:116878226-116903750	ECtrl	E3KO	OK	4.77923	14.0484	1.55556	4.66651	5e-05	0.000724232	yes	Frrs1	2.85017	5.16326	5.28194	9.41955	12.4305	14.379
XLOC_008899	XLOC_008899	Fst	13:114452261-114458730	ECtrl	E3KO	OK	9.55565	13.5597	0.504895	1.64048	0.00435	0.031197	yes	Fst	9.04688	10.8699	7.47656	8.87756	11.6141	14.8362
XLOC_015171	XLOC_015171	Fth1	19:9982702-9985092	ECtrl	E3KO	OK	4454.31	6657.49	0.579777	2.19796	5e-05	0.000724232	yes	Fth1	4263.38	3638.31	4255.61	5219.98	5700.39	5867.11
XLOC_006544	XLOC_006544	Fut8	12:77238103-77476338	ECtrl	E3KO	OK	13.5429	19.8794	0.553744	2.09188	0.00035	0.00396199	yes	Fut8	11.5121	13.8645	12.9952	19.981	14.9411	16.1244
XLOC_032584	XLOC_032584	Fxyd6	9:45370184-45396158	ECtrl	E3KO	OK	105.194	29.1497	-1.8515	-7.03646	5e-05	0.000724232	yes	Fxyd6	138.935	59.028	86.4449	23.1253	30.2559	20.0826
XLOC_024859	XLOC_024859	Fzd1	5:4753841-4758216	ECtrl	E3KO	OK	1.23754	2.56857	1.05349	2.18689	0.0003	0.00348276	yes	Fzd1	0.943687	1.24032	1.25234	3.55128	1.46661	1.33857
XLOC_002357	XLOC_002357	Gadd45b	10:80930090-80932204	ECtrl	E3KO	OK	6.88615	2.98348	-1.2067	-2.26472	0.00035	0.00396199	yes	Gadd45b	9.54951	4.50097	4.53439	0.695732	3.53923	3.42474
XLOC_018256	XLOC_018256	Galnt3	2:66082765-66124994	ECtrl	E3KO	OK	3.72787	10.1917	1.45098	2.0535	0.0012	0.0110638	yes	Galnt3	3.71842	5.17126	1.71951	10.2106	7.06351	9.32558
XLOC_020207	XLOC_020207	Gbp3	3:142560051-142573209	ECtrl	E3KO	OK	8.39128	16.4588	0.9719	3.27539	5e-05	0.000724232	yes	Gbp3	7.38363	6.97371	9.04434	19.8265	11.8124	10.1399
XLOC_003368	XLOC_003368	Gdf11	10:128882294-128891718	ECtrl	E3KO	OK	2.28094	3.80715	0.739081	1.94494	0.00055	0.00580945	yes	Gdf11	2.50933	1.66924	2.19184	4.64361	2.39263	2.58588
XLOC_006921	XLOC_006921	Gen1	12:11240925-11265787	ECtrl	E3KO	OK	2.05596	1.0706	-0.941389	-1.93983	0.00125	0.0114398	yes	Gen1	3.07428	1.83386	1.08101	0.651189	0.928946	1.23175
XLOC_026347	XLOC_026347	Gfpt1	6:87042845-87092197	ECtrl	E3KO	OK	12.8118	19.8087	0.628665	2.29863	5e-05	0.000724232	yes	Gfpt1	8.8525	14.5622	12.9544	13.2353	18.4162	19.6868
XLOC_023461	XLOC_023461	Gja4	4:127311420-127314039	ECtrl	E3KO	OK	4.67497	1.33637	-1.80664	-2.98654	5e-05	0.000724232	yes	Gja4	5.558	2.09036	4.98329	1.12996	1.13372	1.05291
XLOC_019967	XLOC_019967	Gja5	3:97032415-97053634	ECtrl	E3KO	OK	3.37867	0.917008	-1.88145	-3.37735	5e-05	0.000724232	yes	Gja5	3.12733	1.50287	4.78152	1.11191	0.855339	0.347217
XLOC_006001	XLOC_006001	Gjc1	11:102799578-102819700	ECtrl	E3KO	OK	14.9618	7.22429	-1.05035	-3.11158	5e-05	0.000724232	yes	Gjc1	15.0425	11.4342	15.2818	5.31774	7.27426	6.45383
XLOC_034214	XLOC_034214	Gm6787,Psmb7-ps2	X:8097086-8106701	ECtrl	E3KO	OK	0.550304	3.13635	2.51079	2.63984	0.0008	0.00791745	yes	Gm6787,Psmb7-ps2	0.0923851	0.292949	0.388349	3.64433	0.0418485	0.162519
XLOC_020060	XLOC_020060	Gnat2	3:108092788-108101432	ECtrl	E3KO	OK	0.148389	2.66489	4.16662	2.53654	5e-05	0.000724232	yes	Gnat2	0.123377	0.241714	0.0402787	5.66412	0.283124	0.345497
XLOC_008624	XLOC_008624	Golm1	13:59634995-59675784	ECtrl	E3KO	OK	4.04433	7.3798	0.867681	2.67244	5e-05	0.000724232	yes	Golm1	1.83646	4.97228	4.37499	3.76958	6.86555	8.39391
XLOC_012288	XLOC_012288	Gp1bb,Sept5	16:18620318-18629938	ECtrl	E3KO	OK	6.36067	2.95369	-1.10666	-2.48238	0.00015	0.00192134	yes	Gp1bb,Sept5	3.09166	1.99145	3.65342	0.660022	1.66945	1.6538
XLOC_002131	XLOC_002131	Gp49a,Lilrb4	10:51480631-51496613	ECtrl	E3KO	OK	7.92642	16.2041	1.03162	2.90075	5e-05	0.000724232	yes	Gp49a,Lilrb4	1.50889	3.93973	5.95491	7.13616	7.10968	7.2464
XLOC_029626	XLOC_029626	Gpatch1	7:35276535-35318440	ECtrl	E3KO	OK	5.04271	3.32359	-0.601456	-1.67494	0.00335	0.0254018	yes	Gpatch1	4.6133	4.06195	5.05607	2.08748	3.09481	3.23676
XLOC_035329	XLOC_035329	Gpr143	X:152781920-152808646	ECtrl	E3KO	OK	3.28871	6.59836	1.00459	2.11641	0.00035	0.00396199	yes	Gpr143	1.85474	3.88739	3.17487	1.75472	8.15526	7.49275
XLOC_030529	XLOC_030529	Gprc5b	7:118740225-118995211	ECtrl	E3KO	OK	80.2922	47.7922	-0.748483	-2.10066	0.0003	0.00348276	yes	Gprc5b	72.0541	64.809	84.5868	30.2682	52.5172	39.5483
XLOC_008893	XLOC_008893	Gpx8	13:113035110-113091195	ECtrl	E3KO	OK	24.2953	53.1608	1.12969	3.83937	5e-05	0.000724232	yes	Gpx8	18.9948	29.391	19.8555	49.677	40.3173	46.7291
XLOC_000064	XLOC_000064	Gsta3	1:21240588-21265361	ECtrl	E3KO	OK	0.614368	4.56761	2.89426	3.70364	5e-05	0.000724232	yes	Gsta3	0.687724	0.434777	0.639448	5.01072	2.79911	3.78518
XLOC_020871	XLOC_020871	Gstm2	3:107981701-107986453	ECtrl	E3KO	OK	12.2232	20.5207	0.747459	2.11528	0.00025	0.00297984	yes	Gstm2	7.39931	12.4097	14.6208	13.9191	18.3231	20.2265
XLOC_015456	XLOC_015456	Gsto1	19:47737560-47919299	ECtrl	E3KO	OK	91.4208	202.815	1.14957	2.85637	5e-05	0.000724232	yes	Gsto1	75.5591	83.4061	93.4273	189.055	146.858	176.325
XLOC_031025	XLOC_031025	Gtf2e2	8:33731913-33777173	ECtrl	E3KO	OK	28.4901	41.6178	0.546739	1.99034	0.0006	0.0062413	yes	Gtf2e2	31.5235	26.1952	24.3018	51.7339	26.9395	27.4591
XLOC_013805	XLOC_013805	H2-K1	17:33996016-34000333	ECtrl	E3KO	OK	125.049	85.983	-0.540372	-2.10518	0.00015	0.00192134	yes	H2-K1	120.241	71.4411	96.6265	87.8766	57.7417	40.3546
XLOC_013184	XLOC_013184	H2-M3	17:37270219-37274484	ECtrl	E3KO	OK	5.90215	3.54494	-0.735479	-1.61397	0.0054	0.0369354	yes	H2-M3	6.64512	4.27646	4.83047	2.51545	4.10144	2.31998
XLOC_032562	XLOC_032562	H2afx	9:44334714-44336071	ECtrl	E3KO	OK	11.5426	5.35038	-1.10925	-2.20701	0.0004	0.00443257	yes	H2afx	13.9247	7.96197	9.5257	2.91856	5.68887	5.02996
XLOC_020186	XLOC_020186	H2afz	3:137864486-137866922	ECtrl	E3KO	OK	89.6741	48.3629	-0.890793	-1.62081	0.00595	0.0398351	yes	H2afz	89.5182	73.3939	72.8658	19.9206	45.0327	56.7464
XLOC_014824	XLOC_014824	Hbegf	18:36504928-36515805	ECtrl	E3KO	OK	2.45875	7.73476	1.65343	3.89079	5e-05	0.000724232	yes	Hbegf	1.16969	3.62547	2.07915	7.96703	4.57597	7.04056
XLOC_011918	XLOC_011918	Hcls1	16:36934982-36963212	ECtrl	E3KO	OK	7.07806	12.3743	0.805915	2.03058	0.0001	0.00134402	yes	Hcls1	3.05323	7.99134	7.75552	7.35783	10.121	13.1781
XLOC_001392	XLOC_001392	Hdac4	1:91928784-91931176	ECtrl	E3KO	OK	3.66575	1.86126	-0.977825	-1.95801	0.0011	0.0102983	yes	Hdac4	2.31609	2.32398	2.03755	0.471189	1.62659	1.71405
XLOC_004628	XLOC_004628	Helz	11:107531756-107693826	ECtrl	E3KO	OK	7.2072	12.1347	0.751631	2.16822	5e-05	0.000724232	yes	Helz	4.04198	8.61047	8.62131	10.4007	10.0705	11.9271
XLOC_034859	XLOC_034859	Heph	X:96306177-96574485	ECtrl	E3KO	OK	3.38178	5.84362	0.78908	2.21314	0.00025	0.00297984	yes	Heph	2.41243	3.52273	3.49217	5.55511	3.44246	4.44727
XLOC_026160	XLOC_026160	Herc6	6:57580991-57665136	ECtrl	E3KO	OK	2.01671	1.24174	-0.699639	-1.80884	0.00205	0.0171154	yes	Herc6	2.30478	1.74859	1.9542	0.627134	1.35716	1.37167
XLOC_008814	XLOC_008814	Hexb	13:97137936-97198357	ECtrl	E3KO	OK	100.656	65.9579	-0.609823	-2.34187	5e-05	0.000724232	yes	Hexb	106.621	86.1289	97.2989	39.7766	70.6564	63.5228
XLOC_020286	XLOC_020286	Hey1	3:8663361-8667039	ECtrl	E3KO	OK	8.67412	3.08153	-1.49307	-3.58176	5e-05	0.000724232	yes	Hey1	10.8248	7.77328	5.90973	2.04697	2.99248	2.91426
XLOC_025871	XLOC_025871	Hilpda	6:29272487-29275446	ECtrl	E3KO	OK	41.075	61.0944	0.572781	1.99404	0.00065	0.00667132	yes	Hilpda	36.9381	34.551	40.8713	56.8701	49.2764	48.6734
XLOC_008395	XLOC_008395	Hist1h2ac	13:23681466-23683948	ECtrl	E3KO	OK	1.21461	2.57609	1.08469	2.0668	0.001	0.00952306	yes	Hist1h2ac	1.20412	0.916594	1.37328	1.36415	2.15902	3.23771
XLOC_027237	XLOC_027237	Hk2	6:82725024-82774454	ECtrl	E3KO	OK	6.46262	2.70631	-1.25579	-2.22609	0.00035	0.00396199	yes	Hk2	5.36767	4.19875	8.58321	0.405174	3.17448	3.72726
XLOC_003294	XLOC_003294	Hmga2	10:120361274-120476469	ECtrl	E3KO	OK	46.3959	77.3854	0.738064	3.05734	5e-05	0.000724232	yes	Hmga2	28.9362	59.8042	47.2815	55.5106	67.0488	83.6836
XLOC_031113	XLOC_031113	Hmgb2	8:57511842-57515999	ECtrl	E3KO	OK	6.77909	3.84025	-0.819893	-2.30382	0.0001	0.00134402	yes	Hmgb2	8.67859	5.09446	6.46253	4.63294	2.97449	2.44641
XLOC_034651	XLOC_034651	Hmgb3	X:71555917-71560676	ECtrl	E3KO	OK	6.12322	3.10264	-0.980794	-1.89209	0.00095	0.00913113	yes	Hmgb3	6.49065	4.84291	5.6066	1.33729	3.90082	2.78349
XLOC_032814	XLOC_032814	Hmgcll1	9:75775363-76136350	ECtrl	E3KO	OK	2.63418	7.49969	1.50948	3.87577	5e-05	0.000724232	yes	Hmgcll1	1.64101	3.33794	2.70625	6.09812	6.16327	7.6895
XLOC_005086	XLOC_005086	Hmmr	11:40701394-40733422	ECtrl	E3KO	OK	8.05796	4.72773	-0.769268	-2.43131	5e-05	0.000724232	yes	Hmmr	8.7349	8.48063	5.83444	4.31169	3.50444	4.33263
XLOC_031235	XLOC_031235	Hmox1	8:75093590-75100596	ECtrl	E3KO	OK	300.638	574.597	0.934522	3.94706	5e-05	0.000724232	yes	Hmox1	208.914	262.78	343.471	393.735	501.341	552.679
XLOC_011048	XLOC_011048	Hnrnpa1	15:103240431-103244955	ECtrl	E3KO	OK	116.692	77.2415	-0.595256	-2.52879	5e-05	0.000724232	yes	Hnrnpa1	130.657	111.401	83.4214	60.6863	67.2436	70.0266
XLOC_004407	XLOC_004407	Hoxb7,Hoxb8	11:96281904-96290336	ECtrl	E3KO	OK	10.9027	30.9137	1.50356	4.39706	5e-05	0.000724232	yes	Hoxb7,Hoxb8	2.56334	3.23166	3.95483	11.3852	8.55338	8.42005
XLOC_035803	XLOC_035803	Hs6st2	X:51387211-51681856	ECtrl	E3KO	OK	2.46064	5.99901	1.28569	3.45849	5e-05	0.000724232	yes	Hs6st2	1.62401	2.69834	2.29828	7.36985	3.12869	4.48232
XLOC_001911	XLOC_001911	Hsd11b1	1:193203038-193264054	ECtrl	E3KO	OK	23.4135	54.0951	1.20816	4.22098	5e-05	0.000724232	yes	Hsd11b1	23.3011	19.9552	22.9364	43.577	43.2563	52.933
XLOC_025477	XLOC_025477	Hspb8	5:116408490-116422864	ECtrl	E3KO	OK	8.15028	14.9033	0.870714	1.92768	0.001	0.00952306	yes	Hspb8	4.31826	8.98285	8.92695	12.0351	12.3693	13.5607
XLOC_032994	XLOC_032994	Hyal1,Hyal3,Nat6	9:107575819-107587425	ECtrl	E3KO	OK	5.31513	10.0121	0.913574	2.61768	5e-05	0.000724232	yes	Hyal1,Hyal3,Nat6	1.88869	2.05177	1.97172	3.14496	3.17218	3.75172
XLOC_032377	XLOC_032377	Icam1	9:21015959-21039036	ECtrl	E3KO	OK	8.44437	27.7184	1.71478	4.64763	5e-05	0.000724232	yes	Icam1	5.01989	8.37617	9.29423	28.1062	18.8264	21.9364
XLOC_030108	XLOC_030108	Idh2	7:80094845-80115392	ECtrl	E3KO	OK	29.4887	14.9094	-0.983943	-3.33215	5e-05	0.000724232	yes	Idh2	32.1378	19.7123	26.1144	13.3183	12.0855	11.4424
XLOC_007572	XLOC_007572	Idi1	13:8885500-8892451	ECtrl	E3KO	OK	4.00305	7.45455	0.897022	2.36609	5e-05	0.000724232	yes	Idi1	4.84003	3.15598	3.48611	4.6097	4.07389	8.78449
XLOC_001639	XLOC_001639	Ier5	1:155096366-155099636	ECtrl	E3KO	OK	28.6302	45.1134	0.656018	2.64939	5e-05	0.000724232	yes	Ier5	30.5108	28.9195	23.3781	46.6521	35.1884	33.8774
XLOC_001799	XLOC_001799	Ifi204	1:173747292-173766876	ECtrl	E3KO	OK	9.95909	16.2305	0.704621	2.50112	5e-05	0.000724232	yes	Ifi204	8.38745	9.57657	9.9669	15.7226	14.8825	11.2101
XLOC_030712	XLOC_030712	Ifitm3	7:141009585-141010770	ECtrl	E3KO	OK	381.284	637.662	0.741926	3.07976	5e-05	0.000724232	yes	Ifitm3	281.799	257.85	504.335	584.725	536.418	476.162
XLOC_007019	XLOC_007019	Ifrd1	12:40201566-40248504	ECtrl	E3KO	OK	28.0936	52.7177	0.908045	1.81102	0.0031	0.0238603	yes	Ifrd1	29.7117	28.4665	21.129	70.7986	29.4906	32.641
XLOC_032995	XLOC_032995	Ifrd2	9:107587717-107593038	ECtrl	E3KO	OK	2.76158	0.985084	-1.48717	-2.23974	0.0008	0.00791745	yes	Ifrd2	3.29925	2.59825	1.43555	0.0677814	0.865708	1.59528
XLOC_027010	XLOC_027010	Igf2bp3	6:49073794-49214954	ECtrl	E3KO	OK	1.42962	4.02212	1.49233	2.83319	0.0001	0.00134402	yes	Igf2bp3	1.58941	1.14051	1.40259	3.27076	3.41046	3.81421
XLOC_013527	XLOC_013527	Igf2r	17:12682405-12868143	ECtrl	E3KO	OK	11.2524	21.2481	0.9171	3.69759	5e-05	0.000724232	yes	Igf2r	6.17371	11.0754	13.3697	14.2578	17.5908	21.8169
XLOC_004889	XLOC_004889	Igfbp3	11:7206085-7213923	ECtrl	E3KO	OK	57.4879	105.166	0.871332	3.65067	5e-05	0.000724232	yes	Igfbp3	39.6861	63.0216	58.8027	96.9273	70.9293	100.612
XLOC_001281	XLOC_001281	Igfbp5	1:72857931-72874884	ECtrl	E3KO	OK	1.11015	3.1498	1.50451	3.11528	5e-05	0.000724232	yes	Igfbp5	0.382777	0.934731	1.82044	1.93201	3.09616	3.11048
XLOC_019997	XLOC_019997	Igsf3	3:101377124-101463060	ECtrl	E3KO	OK	6.38808	3.84722	-0.731566	-2.48595	0.00015	0.00192134	yes	Igsf3	6.57968	5.1285	5.8138	1.52818	3.96861	4.3838
XLOC_014555	XLOC_014555	Iigp1	18:60376028-60392627	ECtrl	E3KO	OK	2.02091	6.54317	1.69499	4.61572	5e-05	0.000724232	yes	Iigp1	1.32996	1.07496	3.29974	4.85159	5.5159	7.06403
XLOC_034390	XLOC_034390	Il13ra1	X:36112109-36171259	ECtrl	E3KO	OK	6.24903	9.24229	0.564618	1.93586	0.00075	0.007507	yes	Il13ra1	3.22375	7.90429	6.94829	8.87467	7.47546	8.10199
XLOC_016150	XLOC_016150	Il15ra	2:11705286-11733986	ECtrl	E3KO	OK	7.13739	2.8293	-1.33495	-2.07372	5e-05	0.000724232	yes	Il15ra	6.89845	4.1356	8.68866	2.08097	3.16021	2.01387
XLOC_031992	XLOC_031992	Il27ra	8:84021470-84042575	ECtrl	E3KO	OK	3.87678	1.75598	-1.14259	-2.50945	0.00015	0.00192134	yes	Il27ra	5.26496	2.45613	2.64494	1.03131	1.43468	1.94248
XLOC_028871	XLOC_028871	Il4ra	7:125552281-125579472	ECtrl	E3KO	OK	4.18142	8.4731	1.0189	3.3796	5e-05	0.000724232	yes	Il4ra	3.01137	3.60215	4.64963	5.89236	7.04726	8.32019
XLOC_011076	XLOC_011076	Il7r	15:9506160-9529876	ECtrl	E3KO	OK	0.582716	3.16493	2.44131	4.6399	5e-05	0.000724232	yes	Il7r	0.138313	0.609341	0.881779	5.26312	0.879389	1.91179
XLOC_007600	XLOC_007600	Inhba	13:16011850-16027211	ECtrl	E3KO	OK	7.3881	25.1557	1.76761	4.94844	5e-05	0.000724232	yes	Inhba	1.11513	9.82045	8.85163	19.2765	21.8778	21.4905
XLOC_000433	XLOC_000433	Inpp5d	1:87620311-87720507	ECtrl	E3KO	OK	18.9732	31.1456	0.715059	1.92233	0.0007	0.00709513	yes	Inpp5d	13.2843	16.8737	21.6964	22.7525	30.2693	25.7829
XLOC_024002	XLOC_024002	Insig1	5:28071362-28078662	ECtrl	E3KO	OK	24.3313	41.3062	0.763543	3.02233	5e-05	0.000724232	yes	Insig1	21.88	25.4688	21.928	30.6818	35.3405	41.9827
XLOC_019777	XLOC_019777	Iqgap3	3:88082050-88121048	ECtrl	E3KO	OK	2.81109	1.00446	-1.4847	-3.59601	5e-05	0.000724232	yes	Iqgap3	3.18464	1.85039	2.47577	0.900833	0.886722	0.711353
XLOC_008629	XLOC_008629	Isca1	13:59755408-59769810	ECtrl	E3KO	OK	5.99677	9.4381	0.65431	1.71281	0.00225	0.0184493	yes	Isca1	5.67404	5.35518	5.71094	13.7091	4.69013	5.19353
XLOC_006403	XLOC_006403	Ispd	12:36381241-36689444	ECtrl	E3KO	OK	3.11563	1.47571	-1.07811	-2.20684	0.0006	0.0062413	yes	Ispd	3.42119	2.72327	2.77369	0.679948	1.82001	1.3914
XLOC_008901	XLOC_008901	Itga1	13:114958078-115101964	ECtrl	E3KO	OK	4.82793	7.46743	0.629207	1.88437	0.00205	0.0171154	yes	Itga1	3.69656	5.44754	4.66478	7.31313	5.41692	6.59312
XLOC_008900	XLOC_008900	Itga2	13:114835915-114932041	ECtrl	E3KO	OK	1.93484	4.20457	1.11974	3.03632	5e-05	0.000724232	yes	Itga2	0.725994	2.25868	2.40317	2.42724	3.08859	5.3972
XLOC_028924	XLOC_028924	Itgam	7:128062639-128128160	ECtrl	E3KO	OK	0.666609	2.2063	1.72671	2.18903	5e-05	0.000724232	yes	Itgam	0.155586	0.896864	0.769601	1.98428	1.66366	1.9612
XLOC_002272	XLOC_002272	Itgb2	10:77530251-77565708	ECtrl	E3KO	OK	2.68821	8.50606	1.66184	4.18525	5e-05	0.000724232	yes	Itgb2	0.762177	3.78581	2.58612	8.02595	5.57513	7.58399
XLOC_011883	XLOC_011883	Itgb5	16:33829664-33949153	ECtrl	E3KO	OK	1.54729	3.7951	1.29439	1.86411	0.00075	0.007507	yes	Itgb5	0.85868	1.8942	1.29817	1.27988	4.46085	3.90381
XLOC_016021	XLOC_016021	Itih5	2:10153570-10256529	ECtrl	E3KO	OK	6.41564	4.44058	-0.530843	-1.97058	0.0007	0.00709513	yes	Itih5	5.02895	7.06048	5.9497	3.43028	4.23222	3.841
XLOC_000895	XLOC_000895	Itpkb	1:180326969-180424802	ECtrl	E3KO	OK	14.4828	9.05827	-0.677036	-2.6081	5e-05	0.000724232	yes	Itpkb	14.4324	11.507	13.4344	4.11322	9.79892	9.24007
XLOC_030524	XLOC_030524	Itpripl2	7:118485113-118491975	ECtrl	E3KO	OK	77.8233	121.498	0.642656	2.78743	5e-05	0.000724232	yes	Itpripl2	60.2516	91.553	71.5898	108.589	97.5564	109.385
XLOC_012070	XLOC_012070	Jam2	16:84774122-84825928	ECtrl	E3KO	OK	0.889163	3.36611	1.92056	1.81363	0.0046	0.0326234	yes	Jam2	0.189071	1.21492	1.08538	3.52133	0.945368	4.26424
XLOC_031186	XLOC_031186	Jund	8:70697738-70700616	ECtrl	E3KO	OK	16.0531	10.7053	-0.584524	-1.90735	0.0012	0.0110638	yes	Jund	17.4122	15.3453	10.682	7.2865	10.7384	9.07797
XLOC_030869	XLOC_030869	Kbtbd11	8:15011024-15033330	ECtrl	E3KO	OK	18.4225	10.8062	-0.769609	-3.07268	5e-05	0.000724232	yes	Kbtbd11	19.1596	15.6235	16.3239	10.4625	9.3748	7.58182
XLOC_032275	XLOC_032275	Kbtbd3	9:4309742-4331721	ECtrl	E3KO	OK	2.06359	0.901264	-1.19513	-2.05853	0.00105	0.00990498	yes	Kbtbd3	2.82688	1.90197	1.38409	0.162612	0.714102	1.55503
XLOC_036583	XLOC_036583	Kctd12b	X:153685153-153696391	ECtrl	E3KO	OK	42.2605	62.9038	0.573839	2.48331	5e-05	0.000724232	yes	Kctd12b	45.9526	45.7094	35.5046	49.3077	55.3288	65.0549
XLOC_000097	XLOC_000097	Khdrbs2	1:32172805-32657738	ECtrl	E3KO	OK	5.69394	2.05851	-1.46783	-2.82324	5e-05	0.000724232	yes	Khdrbs2	5.16662	5.95379	4.49354	0.917339	2.39892	1.97537
XLOC_015352	XLOC_015352	Kif11	19:37376402-37421859	ECtrl	E3KO	OK	12.0894	5.05078	-1.25916	-4.49805	5e-05	0.000724232	yes	Kif11	15.2553	10.8661	8.78821	5.15491	3.7713	4.12327
XLOC_033149	XLOC_033149	Kif15	9:122951080-123018725	ECtrl	E3KO	OK	2.661	1.12524	-1.24174	-3.19796	5e-05	0.000724232	yes	Kif15	3.47809	2.396	1.72978	0.547195	1.1541	1.22314
XLOC_001403	XLOC_001403	Kif1a	1:93015455-93101865	ECtrl	E3KO	OK	1.34533	2.40014	0.835164	2.26208	0.00015	0.00192134	yes	Kif1a	0.731274	1.11249	1.81013	0.549287	2.32027	3.24911
XLOC_014396	XLOC_014396	Kif20a	18:34624623-34651735	ECtrl	E3KO	OK	14.5035	8.99496	-0.689214	-1.53136	0.0079	0.0497806	yes	Kif20a	13.8223	12.3559	14.1251	8.6307	7.03938	7.14977
XLOC_015341	XLOC_015341	Kif20b	19:34922357-34975731	ECtrl	E3KO	OK	4.87755	3.20284	-0.606805	-2.07598	0.0005	0.00535591	yes	Kif20b	5.27535	4.96436	3.79542	3.11476	2.43743	2.70586
XLOC_030602	XLOC_030602	Kif22	7:127027731-127042420	ECtrl	E3KO	OK	13.7435	4.77393	-1.5255	-4.35129	5e-05	0.000724232	yes	Kif22	16.1693	8.68596	12.6997	2.1882	5.13596	4.87043
XLOC_023318	XLOC_023318	Kif2c	4:117159638-117182639	ECtrl	E3KO	OK	10.5038	3.23239	-1.70024	-4.68559	5e-05	0.000724232	yes	Kif2c	11.2302	7.42961	9.98571	2.27057	3.4552	2.51751
XLOC_006355	XLOC_006355	Klf11	12:24651370-24662774	ECtrl	E3KO	OK	8.65679	4.67162	-0.889909	-2.80732	5e-05	0.000724232	yes	Klf11	7.94707	6.81719	9.76736	3.69482	4.61311	3.76873
XLOC_031223	XLOC_031223	Klf2	8:72319032-72321656	ECtrl	E3KO	OK	26.0934	12.809	-1.02652	-3.0126	5e-05	0.000724232	yes	Klf2	37.5786	16.4564	19.0548	5.47673	14.0167	13.7245
XLOC_031897	XLOC_031897	Klhl26	8:70450227-70476943	ECtrl	E3KO	OK	7.11251	12.1616	0.773903	2.42652	5e-05	0.000724232	yes	Klhl26	6.42446	6.66767	5.96839	10.216	10.3272	9.77627
XLOC_012305	XLOC_012305	Klhl6	16:19946498-19983037	ECtrl	E3KO	OK	21.207	46.8226	1.14267	2.47056	5e-05	0.000724232	yes	Klhl6	13.7645	24.7353	20.0094	46.4003	33.9496	37.3435
XLOC_027590	XLOC_027590	Klra4	6:130043730-130067271	ECtrl	E3KO	OK	2.55485	7.46163	1.54625	3.12827	5e-05	0.000724232	yes	Klra4	0.105266	3.74257	3.42505	5.82839	6.63433	7.15079
XLOC_005606	XLOC_005606	Ksr1	11:79013439-79146407	ECtrl	E3KO	OK	3.00256	1.84573	-0.702003	-1.76336	0.00165	0.0143734	yes	Ksr1	3.0998	2.19325	2.59755	1.26565	1.7815	1.47695
XLOC_011534	XLOC_011534	Lalba	15:98480399-98482683	ECtrl	E3KO	OK	1.00724	4.41637	2.13245	2.51152	0.00035	0.00396199	yes	Lalba	0.736783	1.18416	0.837896	1.58522	4.9157	4.83804
XLOC_001533	XLOC_001533	Lax1	1:133679028-133690108	ECtrl	E3KO	OK	2.85311	5.44976	0.933657	2.29416	0.00015	0.00192134	yes	Lax1	3.08538	2.54179	2.15161	7.27574	3.70519	2.54214
XLOC_009652	XLOC_009652	Lcp1	14:75131100-75230842	ECtrl	E3KO	OK	28.9221	65.3241	1.17544	3.68906	5e-05	0.000724232	yes	Lcp1	15.7631	38.2949	33.0517	53.1509	56.859	84.2355
XLOC_027678	XLOC_027678	Ldhb	6:142490248-142507957	ECtrl	E3KO	OK	7.63925	21.6271	1.50134	4.04279	5e-05	0.000724232	yes	Ldhb	3.32762	7.42895	9.7604	16.3185	15.4723	21.9199
XLOC_012348	XLOC_012348	Leprel1	16:25956474-26105784	ECtrl	E3KO	OK	1.89476	4.14551	1.12954	1.94617	0.0002	0.00245954	yes	Leprel1	2.32288	1.47713	1.50675	3.85443	4.17199	3.02049
XLOC_024768	XLOC_024768	Lfng	5:140607340-140615543	ECtrl	E3KO	OK	5.5632	3.06102	-0.861901	-1.88481	0.00115	0.0106752	yes	Lfng	10.3038	2.27494	2.32199	3.61237	1.7203	2.17194
XLOC_009255	XLOC_009255	Lgals3	14:47367750-47386160	ECtrl	E3KO	OK	40.8756	103.491	1.34019	4.85075	5e-05	0.000724232	yes	Lgals3	31.2392	34.6963	45.6943	90.4232	78.4482	92.3778
XLOC_012326	XLOC_012326	Liph	16:21953825-21995542	ECtrl	E3KO	OK	1.15279	2.44329	1.08369	2.4116	5e-05	0.000724232	yes	Liph	0.893671	1.17155	1.16487	2.73866	1.41806	2.01929
XLOC_014538	XLOC_014538	Lmnb1	18:56707812-56753424	ECtrl	E3KO	OK	17.9308	10.5518	-0.76495	-2.62239	5e-05	0.000724232	yes	Lmnb1	21.9797	16.1576	11.3877	11.4804	7.33714	7.44193
XLOC_015865	XLOC_015865	Loxl4	19:42593981-42612813	ECtrl	E3KO	OK	15.9156	24.4984	0.622247	2.40162	5e-05	0.000724232	yes	Loxl4	11.6631	12.8639	18.1393	19.801	20.5324	21.09
XLOC_009645	XLOC_009645	Lpar6	14:73123036-73325822	ECtrl	E3KO	OK	52.5527	107.821	1.0368	3.36874	5e-05	0.000724232	yes	Lpar6	39.9078	60.9293	54.4663	88.5068	92.0668	108.13
XLOC_006932	XLOC_006932	Lpin1	12:16535668-16589770	ECtrl	E3KO	OK	7.21247	11.6873	0.69637	2.60313	0.0001	0.00134402	yes	Lpin1	5.61349	6.38043	8.03991	9.62797	9.40121	10.7104
XLOC_036516	XLOC_036516	Lrch2	X:147470374-147554081	ECtrl	E3KO	OK	11.9057	7.42049	-0.682071	-1.92522	0.00135	0.0121853	yes	Lrch2	11.6707	12.0742	10.055	4.76913	8.01621	6.60987
XLOC_029559	XLOC_029559	Lrfn3	7:30355513-30362772	ECtrl	E3KO	OK	2.64939	1.28216	-1.04708	-1.8961	0.00155	0.0136555	yes	Lrfn3	2.16515	2.2381	2.77416	0.232586	1.57294	1.48978
XLOC_018389	XLOC_018389	Lrrc55	2:85160777-85196699	ECtrl	E3KO	OK	0.760334	4.3794	2.52603	4.32561	5e-05	0.000724232	yes	Lrrc55	0.394151	1.66637	0.104388	1.92061	4.48477	5.17744
XLOC_013410	XLOC_013410	Ltbp1	17:75005567-75392512	ECtrl	E3KO	OK	8.46938	4.48648	-0.916673	-2.36693	5e-05	0.000724232	yes	Ltbp1	8.22946	8.17648	7.72118	3.45165	4.66222	4.09023
XLOC_029503	XLOC_029503	Ltbp4	7:27305135-27337692	ECtrl	E3KO	OK	5.27509	1.33853	-1.97855	-1.80144	0.0016	0.0140202	yes	Ltbp4	8.66206	2.54431	3.10331	0.601238	1.65083	1.18125
XLOC_001873	XLOC_001873	Lyplal1	1:186087730-186117310	ECtrl	E3KO	OK	5.37834	2.46479	-1.1257	-2.24368	0.00035	0.00396199	yes	Lyplal1	5.85786	5.62394	3.93878	0.0923861	3.3646	3.14463
XLOC_032812	XLOC_032812	Lysmd2	9:75625731-75637773	ECtrl	E3KO	OK	24.672	12.8755	-0.938247	-2.70992	5e-05	0.000724232	yes	Lysmd2	24.2552	23.9211	21.0108	9.10937	12.4008	11.6693
XLOC_003271	XLOC_003271	Lyz2	10:117277333-117282274	ECtrl	E3KO	OK	80.2114	219.823	1.45446	5.84721	5e-05	0.000724232	yes	Lyz2	28.0269	111.142	80.4688	132.877	211.698	221.459
XLOC_036138	XLOC_036138	Maged1	X:94535473-94542143	ECtrl	E3KO	OK	172.991	257.109	0.571683	2.44399	5e-05	0.000724232	yes	Maged1	142.975	146.207	178.74	192.001	220.755	232.176
XLOC_036578	XLOC_036578	Mageh1	X:153036165-153037563	ECtrl	E3KO	OK	12.899	20.336	0.656777	2.0101	0.0004	0.00443257	yes	Mageh1	12.2639	11.8956	12.3368	17.2856	18.3022	16.8042
XLOC_031741	XLOC_031741	Mak16	8:31150315-31168724	ECtrl	E3KO	OK	42.4429	63.7187	0.586191	2.33108	5e-05	0.000724232	yes	Mak16	38.2486	42.0155	40.2338	58.6854	52.0712	51.8118
XLOC_015571	XLOC_015571	Malat1	19:5795689-5802672	ECtrl	E3KO	OK	63.9636	167.104	1.38542	2.32309	5e-05	0.000724232	yes	Malat1	57.1471	83.416	53.6882	259.991	65.424	100.742
XLOC_018896	XLOC_018896	Mall	2:127704385-127729932	ECtrl	E3KO	OK	44.4853	23.5581	-0.917104	-3.44558	5e-05	0.000724232	yes	Mall	53.6852	33.0921	38.2142	14.8143	23.5508	22.541
XLOC_020423	XLOC_020423	Maml3	3:51687610-52104891	ECtrl	E3KO	OK	1.9553	3.28482	0.748429	1.76058	0.00295	0.0229449	yes	Maml3	1.23928	1.56732	1.88339	3.0304	2.14159	2.64599
XLOC_013367	XLOC_013367	Man2a1	17:64600735-64755110	ECtrl	E3KO	OK	37.9585	56.8767	0.583416	2.38003	5e-05	0.000724232	yes	Man2a1	27.6009	42.8123	38.9309	38.6324	51.2257	58.4206
XLOC_027634	XLOC_027634	Mansc1	6:134609209-134632488	ECtrl	E3KO	OK	23.1307	15.0606	-0.619026	-2.22753	5e-05	0.000724232	yes	Mansc1	22.7838	19.5714	23.3818	10.8582	14.1954	13.932
XLOC_034296	XLOC_034296	Maoa	X:16619697-16687818	ECtrl	E3KO	OK	29.6872	62.1451	1.0658	4.60472	5e-05	0.000724232	yes	Maoa	23.3859	32.9839	30.6891	53.3805	56.9254	55.4713
XLOC_012745	XLOC_012745	Map3k4	17:12227620-12318660	ECtrl	E3KO	OK	8.16748	4.34008	-0.91217	-2.13377	0.00105	0.00990498	yes	Map3k4	4.4958	3.85044	5.54676	0.921934	3.52289	2.6578
XLOC_003737	XLOC_003737	Mapk9	11:49846750-49886421	ECtrl	E3KO	OK	50.398	32.068	-0.652233	-1.97995	0.00105	0.00990498	yes	Mapk9	44.0633	50.8871	47.9336	27.5736	35.0784	20.661
XLOC_014348	XLOC_014348	Mapre2	18:23752332-23893861	ECtrl	E3KO	OK	23.571	15.4578	-0.608675	-1.8513	0.0015	0.0132916	yes	Mapre2	22.1758	22.0025	22.5718	12.6741	13.3679	13.8687
XLOC_022101	XLOC_022101	Marcksl1	4:129513580-129515985	ECtrl	E3KO	OK	269.463	395.654	0.554154	2.43814	0.0001	0.00134402	yes	Marcksl1	286.195	225.236	214.917	341.676	307.094	340.63
XLOC_029076	XLOC_029076	Mboat7	7:3677789-3701023	ECtrl	E3KO	OK	10.217	17.5654	0.781761	2.19765	0.0001	0.00134402	yes	Mboat7	9.06305	11.3104	13.1476	18.6226	17.2848	20.6419
XLOC_028417	XLOC_028417	Mcee	7:64392644-64412121	ECtrl	E3KO	OK	22.3586	37.5808	0.749168	2.22926	5e-05	0.000724232	yes	Mcee	22.3221	17.518	20.5723	43.6648	29.1164	21.5478
XLOC_001044	XLOC_001044	Mcm3	1:20802973-20820278	ECtrl	E3KO	OK	17.1801	11.6059	-0.565876	-2.04416	0.0005	0.00535591	yes	Mcm3	19.5628	11.1596	15.4803	7.94722	9.66249	11.5267
XLOC_031236	XLOC_031236	Mcm5	8:75109527-75128439	ECtrl	E3KO	OK	5.67604	2.80145	-1.01871	-2.80139	5e-05	0.000724232	yes	Mcm5	5.9105	5.00894	4.61796	1.60247	2.79818	2.75114
XLOC_003275	XLOC_003275	Mdm2	10:117688887-117710758	ECtrl	E3KO	OK	74.8767	165.56	1.14476	4.42787	5e-05	0.000724232	yes	Mdm2	56.5317	85.1518	75.0801	128.536	131.771	185.743
XLOC_030058	XLOC_030058	Mef2a	7:67231162-67372858	ECtrl	E3KO	OK	44.442	66.5757	0.58307	1.88918	0.00215	0.0177943	yes	Mef2a	37.0357	53.4825	54.2851	52.419	61.7035	64.8895
XLOC_021394	XLOC_021394	Melk	4:44300875-44364675	ECtrl	E3KO	OK	4.36277	2.52736	-0.787615	-1.88229	0.0007	0.00709513	yes	Melk	5.38227	3.04698	3.88996	3.58487	1.20271	1.55264
XLOC_025902	XLOC_025902	Mest	6:30723546-30896794	ECtrl	E3KO	OK	262.673	853.456	1.70005	4.13976	5e-05	0.000724232	yes	Mest	165.564	223.956	208.496	695.664	563.87	693.933
XLOC_001683	XLOC_001683	Mettl13	1:162532126-162548551	ECtrl	E3KO	OK	4.95669	2.61	-0.925324	-2.12454	0.00035	0.00396199	yes	Mettl13	4.37295	3.62578	5.58412	0.470172	2.86745	3.34795
XLOC_028499	XLOC_028499	Mex3b	7:82867332-82871563	ECtrl	E3KO	OK	3.0602	1.42496	-1.1027	-2.27433	0.00035	0.00396199	yes	Mex3b	3.78035	2.34084	2.85565	0.515112	1.75207	1.52541
XLOC_026364	XLOC_026364	Mgll	6:88716423-88828360	ECtrl	E3KO	OK	52.1564	26.831	-0.958945	-3.92092	5e-05	0.000724232	yes	Mgll	65.8335	32.7024	44.3678	21.0891	23.9935	22.2297
XLOC_033246	XLOC_033246	Mir1900,mmu-mir-1900	9:21015959-21039036	ECtrl	E3KO	OK	4.30464	13.4741	1.64623	3.37104	5e-05	0.000724232	yes	Mir1900,mmu-mir-1900	1.53262	2.02387	2.4561	5.8274	4.90376	6.47645
XLOC_024811	XLOC_024811	Mir5105	5:146231229-146302874	ECtrl	E3KO	OK	232364	1860000	3.00322	3.04771	0.0024	0.0194009	yes	Mir5105	232371	214235	175158	4097180	180247	154202
XLOC_024903	XLOC_024903	Mir5109	5:17776748-17776835	ECtrl	E3KO	OK	6794.15	58302.1	3.10118	3.08036	0.00025	0.00297984	yes	Mir5109	9005.97	4068.02	5599.16	129180	5246.14	4454.35
XLOC_030676	XLOC_030676	Mki67	7:135689787-135716379	ECtrl	E3KO	OK	8.44385	4.26997	-0.983676	-3.9614	5e-05	0.000724232	yes	Mki67	8.79693	7.65644	6.8499	2.92141	3.6943	4.28657
XLOC_014700	XLOC_014700	Mkx	18:6910458-7004726	ECtrl	E3KO	OK	0.456736	2.76876	2.59981	2.62148	0.0003	0.00348276	yes	Mkx	0.0538449	0.443543	0.784804	5.38238	0.323859	1.00739
XLOC_004351	XLOC_004351	Mmd	11:90187683-90278589	ECtrl	E3KO	OK	61.8837	123.073	0.991878	4.24397	5e-05	0.000724232	yes	Mmd	51.7763	73.7285	55.3009	105.995	103.171	116.802
XLOC_005652	XLOC_005652	Mmp28	11:83437685-83463071	ECtrl	E3KO	OK	4.84065	13.4893	1.47855	4.58998	5e-05	0.000724232	yes	Mmp28	3.80628	6.16494	4.34733	15.8581	11.6603	12.3501
XLOC_020557	XLOC_020557	Mnd1	3:84087933-84155786	ECtrl	E3KO	OK	1.73164	4.31886	1.31851	1.87887	0.0015	0.0132916	yes	Mnd1	2.26691	1.44106	1.066	9.09088	0.359562	0.785349
XLOC_014357	XLOC_014357	Mocos	18:24653690-24701556	ECtrl	E3KO	OK	7.14615	11.7288	0.714814	2.29363	5e-05	0.000724232	yes	Mocos	6.35056	5.24108	7.8769	7.18691	10.7958	11.8424
XLOC_036463	XLOC_036463	Morc4	X:139821631-139871677	ECtrl	E3KO	OK	24.7678	41.6196	0.748796	1.88473	0.0003	0.00348276	yes	Morc4	14.0395	27.853	28.2686	34.2345	38.9136	36.9
XLOC_023016	XLOC_023016	Mpdz	4:81278499-81442815	ECtrl	E3KO	OK	30.5213	16.664	-0.873081	-1.97268	0.00035	0.00396199	yes	Mpdz	39.2433	38.2314	36.3308	15.2384	27.7233	25.0947
XLOC_036010	XLOC_036010	Mpp1	X:75095853-75131016	ECtrl	E3KO	OK	231.783	532.652	1.20042	4.16413	5e-05	0.000724232	yes	Mpp1	166.412	224.164	244.388	470.521	434.527	445.299
XLOC_016159	XLOC_016159	Mrc1	2:14229413-14332057	ECtrl	E3KO	OK	5.53178	8.00262	0.532728	1.82015	0.0016	0.0140202	yes	Mrc1	8.57497	3.60847	3.41957	3.14116	6.82831	10.814
XLOC_001277	XLOC_001277	Mreg	1:72159232-72212307	ECtrl	E3KO	OK	0.757833	2.35517	1.63588	2.63737	5e-05	0.000724232	yes	Mreg	0.246521	1.29081	0.627769	1.35677	2.50396	2.36323
XLOC_031200	XLOC_031200	Mrpl34	8:71464925-71465752	ECtrl	E3KO	OK	14.4618	33.4411	1.20937	2.62788	5e-05	0.000724232	yes	Mrpl34	14.4157	11.9085	12.4809	54.3642	12.0494	12.1283
XLOC_015675	XLOC_015675	Ms4a6d	19:11586603-11604849	ECtrl	E3KO	OK	7.02059	17.101	1.28441	3.44365	5e-05	0.000724232	yes	Ms4a6d	3.38926	8.22083	7.99157	13.7946	15.0641	15.6243
XLOC_000295	XLOC_000295	Mtap2	1:66175272-66442583	ECtrl	E3KO	OK	0.0255738	5.22749	7.67531	0.565893	5e-05	0.000724232	yes	Mtap2	0.0119904	0.0439096	0.0195071	12.8947	0.0375554	0.0886144
XLOC_010617	XLOC_010617	Mtdh	15:34082693-34142386	ECtrl	E3KO	OK	64.9772	116.414	0.841263	1.90514	0.00205	0.0171154	yes	Mtdh	53.0978	60.8612	62.0361	138.298	78.7418	76.2616
XLOC_031486	XLOC_031486	Mtss1l	8:110721475-110741400	ECtrl	E3KO	OK	6.93457	3.4726	-0.997792	-2.76605	5e-05	0.000724232	yes	Mtss1l	7.2368	4.58532	6.66974	1.90266	4.62622	2.76724
XLOC_021013	XLOC_021013	Mttp	3:138089854-138143388	ECtrl	E3KO	OK	1.24782	2.49745	1.00104	2.34217	0.00015	0.00192134	yes	Mttp	0.750426	1.0391	1.69343	1.48885	2.09776	2.86161
XLOC_035184	XLOC_035184	Mum1l1	X:139210041-139238335	ECtrl	E3KO	OK	2.26687	4.41851	0.962861	2.20378	0.0001	0.00134402	yes	Mum1l1	2.09511	3.20713	1.43861	4.2805	2.64688	4.54908
XLOC_022499	XLOC_022499	Mxra8	4:155839491-155844088	ECtrl	E3KO	OK	169.455	319.901	0.916725	2.41621	5e-05	0.000724232	yes	Mxra8	108.518	163.187	200.263	265.105	295.094	272.595
XLOC_004279	XLOC_004279	Myo19	11:84876314-84916366	ECtrl	E3KO	OK	3.41274	9.41727	1.46438	2.02101	0.0009	0.00873141	yes	Myo19	1.74585	3.33769	4.23724	11.749	5.16211	6.59995
XLOC_010438	XLOC_010438	Naa16	14:79334203-79390778	ECtrl	E3KO	OK	8.18684	12.8954	0.655476	1.81075	0.00075	0.007507	yes	Naa16	7.28434	8.37382	8.46388	14.1783	9.06045	10.483
XLOC_008835	XLOC_008835	Naip2	13:100144062-100202092	ECtrl	E3KO	OK	2.64104	5.84534	1.14618	3.61216	5e-05	0.000724232	yes	Naip2	2.02226	2.80366	2.48818	4.54592	4.88273	5.55563
XLOC_024917	XLOC_024917	Napepld	5:21662900-21701396	ECtrl	E3KO	OK	3.96324	1.7884	-1.14801	-2.90648	5e-05	0.000724232	yes	Napepld	4.40881	3.26071	3.81645	0.940732	2.11054	1.67789
XLOC_027526	XLOC_027526	Ncapd2	6:125168008-125191595	ECtrl	E3KO	OK	12.3148	5.81655	-1.08216	-3.79352	5e-05	0.000724232	yes	Ncapd2	11.8551	9.21232	12.2755	3.60364	5.28722	5.76975
XLOC_006879	XLOC_006879	Ncapg2	12:116405401-116463531	ECtrl	E3KO	OK	4.05292	2.64922	-0.613392	-1.97125	0.0006	0.0062413	yes	Ncapg2	4.22006	4.26943	3.25893	2.70259	1.68652	2.4844
XLOC_009130	XLOC_009130	Ncoa4	14:32159864-32179855	ECtrl	E3KO	OK	6.87353	12.8479	0.902413	1.8799	0.00095	0.00913113	yes	Ncoa4	4.44244	7.69983	6.66631	16.1637	7.60051	8.40945
XLOC_016360	XLOC_016360	Ncs1	2:31245822-31295989	ECtrl	E3KO	OK	8.77737	5.20829	-0.752978	-1.89458	0.00035	0.00396199	yes	Ncs1	7.88804	7.18431	8.95003	1.9445	7.16242	4.43125
XLOC_014174	XLOC_014174	Ndc80	17:71496099-71526857	ECtrl	E3KO	OK	11.3048	6.34016	-0.834338	-2.58117	5e-05	0.000724232	yes	Ndc80	14.3668	9.92287	7.5511	7.7346	4.27739	3.88197
XLOC_012440	XLOC_012440	Ndufb4	16:37647169-37654453	ECtrl	E3KO	OK	9.9337	5.2502	-0.919961	-1.92177	0.00145	0.0129287	yes	Ndufb4	12.772	9.46798	6.08068	1.77449	7.39796	4.71693
XLOC_031826	XLOC_031826	Neil3	8:53586866-53639065	ECtrl	E3KO	OK	4.1346	1.539	-1.42575	-2.58197	0.0001	0.00134402	yes	Neil3	6.3113	2.78899	2.58895	1.45556	1.28893	1.14242
XLOC_000952	XLOC_000952	Nek2	1:191821443-191833050	ECtrl	E3KO	OK	9.7355	4.44465	-1.13119	-3.32959	5e-05	0.000724232	yes	Nek2	10.7745	7.46151	8.44469	4.84184	2.81351	3.38254
XLOC_031693	XLOC_031693	Nek3	8:22128282-22166435	ECtrl	E3KO	OK	4.38694	1.89358	-1.2121	-2.39737	5e-05	0.000724232	yes	Nek3	4.62314	3.9338	3.39615	0.0730439	2.59185	2.28902
XLOC_019775	XLOC_019775	Nes	3:87971077-87980451	ECtrl	E3KO	OK	12.3076	6.49305	-0.922587	-3.35141	5e-05	0.000724232	yes	Nes	6.89956	13.9312	11.8381	3.63795	7.86782	4.87097
XLOC_001100	XLOC_001100	Neurl3	1:36264601-36273425	ECtrl	E3KO	OK	12.009	18.5979	0.631019	2.19097	0.00025	0.00297984	yes	Neurl3	7.44453	12.6459	12.7491	15.3425	14.0957	17.6574
XLOC_015014	XLOC_015014	Nfatc1	18:80606204-80713071	ECtrl	E3KO	OK	67.2223	40.7531	-0.722029	-3.10138	5e-05	0.000724232	yes	Nfatc1	80.4669	47.6509	59.8857	30.6388	38.9687	34.8813
XLOC_032010	XLOC_032010	Nfix	8:84699875-84800344	ECtrl	E3KO	OK	6.55811	4.29298	-0.6113	-1.56444	0.0038	0.0280514	yes	Nfix	7.07965	6.13146	5.86453	4.09351	3.30101	3.79713
XLOC_012506	XLOC_012506	Nfkbiz	16:55811374-55838899	ECtrl	E3KO	OK	5.58952	8.43068	0.592924	1.83127	0.0021	0.0174552	yes	Nfkbiz	4.45982	6.16573	5.21152	8.88725	5.96347	6.68217
XLOC_007589	XLOC_007589	Nid1	13:13437601-13512275	ECtrl	E3KO	OK	135.55	228.863	0.755658	3.19986	5e-05	0.000724232	yes	Nid1	117.816	131.487	127.837	141.958	191.865	256.612
XLOC_024214	XLOC_024214	Nipal1	5:72647795-72671078	ECtrl	E3KO	OK	1.6278	4.03854	1.31091	3.36016	5e-05	0.000724232	yes	Nipal1	0.959602	2.34968	1.4528	2.80927	3.69998	4.24797
XLOC_008858	XLOC_008858	Nln	13:104023438-104109614	ECtrl	E3KO	OK	13.9609	8.74683	-0.674563	-2.45686	5e-05	0.000724232	yes	Nln	13.4678	12.7479	13.5568	5.55747	9.90883	7.38966
XLOC_012163	XLOC_012163	Nlrc3	16:3945006-3976632	ECtrl	E3KO	OK	3.74159	1.86329	-1.0058	-2.57235	5e-05	0.000724232	yes	Nlrc3	4.13785	3.34523	3.09932	1.34504	1.93128	1.58476
XLOC_000713	XLOC_000713	Nmnat2	1:152955100-153119260	ECtrl	E3KO	OK	0.594643	4.03423	2.7622	5.60892	5e-05	0.000724232	yes	Nmnat2	0.172502	0.735172	0.71504	3.00323	2.84453	4.43575
XLOC_033461	XLOC_033461	Nnmt	9:48591876-48605153	ECtrl	E3KO	OK	14.7743	39.1676	1.40657	3.12046	5e-05	0.000724232	yes	Nnmt	7.59825	18.537	13.9535	53.9976	22.1356	20.1348
XLOC_019973	XLOC_019973	Notch2	3:98013537-98150367	ECtrl	E3KO	OK	12.994	8.86538	-0.551595	-2.25589	0.0002	0.00245954	yes	Notch2	11.263	11.5059	12.5253	4.72526	9.29755	8.56303
XLOC_013072	XLOC_013072	Notch4	17:34564267-34588503	ECtrl	E3KO	OK	42.7878	64.6362	0.595145	1.94555	0.00035	0.00396199	yes	Notch4	5.72642	9.36388	13.1307	9.15965	11.1792	11.4862
XLOC_020644	XLOC_020644	Npr1	3:90450590-90465866	ECtrl	E3KO	OK	39.9715	75.5763	0.918964	2.56642	5e-05	0.000724232	yes	Npr1	31.3457	37.7	40.8023	54.2075	66.5513	72.9222
XLOC_006200	XLOC_006200	Nptx1	11:119538718-119547753	ECtrl	E3KO	OK	3.3538	6.63436	0.98416	2.95493	5e-05	0.000724232	yes	Nptx1	1.47806	3.15297	4.63103	2.90907	5.72711	8.35817
XLOC_026104	XLOC_026104	Npy	6:49822709-49829507	ECtrl	E3KO	OK	48.9709	14.6587	-1.74017	-4.07165	5e-05	0.000724232	yes	Npy	65.8929	22.8104	46.0013	0.345087	20.1594	18.0353
XLOC_031746	XLOC_031746	Nrg1	8:31818027-31918203	ECtrl	E3KO	OK	1.34271	4.81174	1.84142	3.51415	5e-05	0.000724232	yes	Nrg1	0.598748	1.41734	1.66622	4.07362	4.43341	3.75197
XLOC_015124	XLOC_015124	Nrxn2	19:6418730-6544899	ECtrl	E3KO	OK	8.40873	4.54532	-0.887507	-1.68923	0.00485	0.0340002	yes	Nrxn2	11.3773	6.95275	4.00139	4.00641	3.15122	4.1902
XLOC_025070	XLOC_025070	Nsg1	5:38038741-38159467	ECtrl	E3KO	OK	47.6518	22.6662	-1.07199	-3.06825	5e-05	0.000724232	yes	Nsg1	47.007	41.5533	45.6529	16.0053	25.8972	16.6515
XLOC_000945	XLOC_000945	Nsl1	1:191063011-191084558	ECtrl	E3KO	OK	2.69191	1.28766	-1.06388	-2.06742	0.0004	0.00443257	yes	Nsl1	3.05471	1.87441	2.50986	0.908986	1.2058	1.16602
XLOC_005397	XLOC_005397	Ntn1	11:68209363-68400823	ECtrl	E3KO	OK	3.32035	1.64694	-1.01155	-2.5554	5e-05	0.000724232	yes	Ntn1	2.91119	2.1049	4.12204	1.077	1.73242	1.36623
XLOC_003216	XLOC_003216	Nts	10:102481759-102490418	ECtrl	E3KO	OK	167.827	43.7655	-1.93911	-7.19051	5e-05	0.000724232	yes	Nts	241.853	130.34	123.981	58.6664	37.0254	18.0978
XLOC_028809	XLOC_028809	Nucb2	7:116504373-116540584	ECtrl	E3KO	OK	17.2659	27.9908	0.697027	2.54647	5e-05	0.000724232	yes	Nucb2	12.4505	18.9406	16.1545	24.3435	21.731	24.3465
XLOC_001734	XLOC_001734	Nuf2	1:169497933-169531464	ECtrl	E3KO	OK	11.1994	4.41949	-1.34147	-3.94894	5e-05	0.000724232	yes	Nuf2	13.6295	9.15777	9.09764	2.59304	4.56134	4.36438
XLOC_002140	XLOC_002140	Nus1	10:52417546-52440192	ECtrl	E3KO	OK	55.6382	98.1508	0.818923	2.49703	0.00025	0.00297984	yes	Nus1	44.1748	70.6469	50.6506	80.7782	82.7333	95.8395
XLOC_017104	XLOC_017104	Nusap1	2:119609511-119651244	ECtrl	E3KO	OK	16.6112	6.92753	-1.26174	-3.09757	5e-05	0.000724232	yes	Nusap1	21.7755	13.9256	11.5926	6.89078	5.20861	5.78872
XLOC_025191	XLOC_025191	Ociad2	5:73322198-73338947	ECtrl	E3KO	OK	2.22507	7.57723	1.76782	3.31682	5e-05	0.000724232	yes	Ociad2	1.96926	1.56288	2.71805	8.45708	4.93654	5.95644
XLOC_008841	XLOC_008841	Ocln	13:100496506-100552718	ECtrl	E3KO	OK	4.91845	2.23033	-1.14095	-1.92324	0.0003	0.00348276	yes	Ocln	3.59592	6.07871	4.22229	2.82245	1.35308	1.57576
XLOC_006329	XLOC_006329	Odc1	12:17544872-17551502	ECtrl	E3KO	OK	167.642	269.289	0.683773	2.98605	5e-05	0.000724232	yes	Odc1	170.059	140.115	153.748	244.212	220.368	219.716
XLOC_000807	XLOC_000807	Olfml2b	1:170644531-170682789	ECtrl	E3KO	OK	3.03795	1.56736	-0.954765	-2.0732	0.00075	0.007507	yes	Olfml2b	2.31611	2.80503	3.16483	0.530623	2.08873	1.44317
XLOC_016195	XLOC_016195	Otud1	2:19658061-19660590	ECtrl	E3KO	OK	8.52558	5.12179	-0.735148	-1.97872	0.0007	0.00709513	yes	Otud1	10.5198	8.36746	6.16267	5.5248	3.90469	3.8034
XLOC_016901	XLOC_016901	Pacsin3	2:91250742-91264679	ECtrl	E3KO	OK	3.56114	1.53509	-1.21402	-1.66673	0.00045	0.00489747	yes	Pacsin3	3.26064	2.26515	4.3491	0.75871	2.5625	1.73633
XLOC_031845	XLOC_031845	Palld	8:61513245-61922834	ECtrl	E3KO	OK	20.8578	49.8826	1.25795	2.25766	5e-05	0.000724232	yes	Palld	13.5497	18.3064	25.3409	47.3879	41.424	34.6857
XLOC_002312	XLOC_002312	Palm	10:79793571-79820896	ECtrl	E3KO	OK	10.4263	5.81751	-0.841756	-2.49304	0.0001	0.00134402	yes	Palm	12.0785	5.94507	9.81227	3.88381	5.65154	4.99612
XLOC_020931	XLOC_020931	Palmd	3:116918255-116984406	ECtrl	E3KO	OK	5.51333	14.7482	1.41954	4.09702	5e-05	0.000724232	yes	Palmd	2.31027	6.97785	5.30687	10.8736	15.5905	13.0562
XLOC_015324	XLOC_015324	Papss2	19:32620004-32667187	ECtrl	E3KO	OK	1.55923	2.63319	0.755978	1.79453	0.00215	0.0177943	yes	Papss2	1.06084	1.43678	1.87289	1.22377	2.22385	3.40539
XLOC_013629	XLOC_013629	Paqr4	17:23726335-23740330	ECtrl	E3KO	OK	3.96285	0.719971	-2.46053	-4.01133	5e-05	0.000724232	yes	Paqr4	5.35106	2.3316	3.03995	0.194559	1.08945	0.578837
XLOC_003012	XLOC_003012	Pcbp3	10:76761856-76961887	ECtrl	E3KO	OK	9.64245	5.05046	-0.932986	-1.77743	0.002	0.0167846	yes	Pcbp3	8.15336	10.0954	8.20868	1.02887	6.30355	6.03092
XLOC_014841	XLOC_014841	Pcdh1	18:38185914-38229145	ECtrl	E3KO	OK	24.8762	38.8396	0.642765	2.29194	5e-05	0.000724232	yes	Pcdh1	15.8245	26.1748	35.7177	29.4887	39.5069	40.5929
XLOC_014843	XLOC_014843	Pcdh12	18:38267091-38284401	ECtrl	E3KO	OK	20.5311	34.2239	0.737194	3.09242	5e-05	0.000724232	yes	Pcdh12	14.7071	18.7676	22.7853	29.0528	28.1366	29.4436
XLOC_009678	XLOC_009678	Pcdh17	14:84443562-84537060	ECtrl	E3KO	OK	1.43766	2.07804	0.5315	1.57082	0.00695	0.0449698	yes	Pcdh17	1.13557	1.50161	1.51427	1.3549	1.64833	2.43487
XLOC_018960	XLOC_018960	Pcna	2:132249161-132253314	ECtrl	E3KO	OK	14.0749	8.90421	-0.660562	-1.90628	0.00055	0.00580945	yes	Pcna	15.3837	12.1595	13.2301	6.80841	9.68802	6.83119
XLOC_034836	XLOC_034836	Pcyt1b	X:93654862-93749951	ECtrl	E3KO	OK	1.07394	2.14037	0.994949	1.83478	0.00115	0.0106752	yes	Pcyt1b	0.881968	1.39163	0.697961	2.11264	1.35982	1.94703
XLOC_018351	XLOC_018351	Pde1a	2:79834452-80129458	ECtrl	E3KO	OK	0.62229	2.49386	2.00272	2.30323	0.00025	0.00297984	yes	Pde1a	0.247926	0.831427	0.859501	2.08654	1.88143	2.48097
XLOC_025675	XLOC_025675	Pdgfa	5:138976013-139000576	ECtrl	E3KO	OK	1.86444	5.00146	1.42361	1.74268	0.0006	0.0062413	yes	Pdgfa	0.85008	2.02681	2.06789	5.25932	2.54281	4.05817
XLOC_016652	XLOC_016652	Pdk1	2:71873223-71903858	ECtrl	E3KO	OK	9.24438	24.1152	1.3833	2.68439	5e-05	0.000724232	yes	Pdk1	5.25388	8.86187	11.1663	26.0368	14.9356	18.8209
XLOC_026788	XLOC_026788	Pdk4	6:5483350-5496309	ECtrl	E3KO	OK	3.55628	11.9459	1.74808	5.2291	5e-05	0.000724232	yes	Pdk4	1.50328	4.42823	4.0952	9.17473	10.1444	11.6894
XLOC_008595	XLOC_008595	Pdlim7	13:55495794-55513676	ECtrl	E3KO	OK	31.5784	18.9492	-0.7368	-2.49682	5e-05	0.000724232	yes	Pdlim7	29.833	24.338	30.4093	15.3188	18.8028	13.3891
XLOC_031402	XLOC_031402	Pdp2	8:104591467-104596836	ECtrl	E3KO	OK	2.71749	1.5352	-0.823846	-1.82733	0.0026	0.0206827	yes	Pdp2	2.55254	2.38255	2.64949	0.712808	1.78177	1.50289
XLOC_019123	XLOC_019123	Pdrg1	2:153008889-153015427	ECtrl	E3KO	OK	54.7476	91.4851	0.74074	2.19015	0.00015	0.00192134	yes	Pdrg1	55.8391	47.5158	48.1591	78.1819	72.5178	79.7345
XLOC_011091	XLOC_011091	Pdzd2	15:12357053-12592556	ECtrl	E3KO	OK	2.76746	1.64987	-0.746209	-2.53892	0.0001	0.00134402	yes	Pdzd2	2.43107	2.68082	2.52867	1.04789	1.4558	1.71228
XLOC_001984	XLOC_001984	Perp	10:18845070-18857073	ECtrl	E3KO	OK	3.94102	24.3311	2.62616	6.97383	5e-05	0.000724232	yes	Perp	1.89496	5.62929	3.73532	19.1124	17.6144	27.0823
XLOC_022478	XLOC_022478	Pex10	4:155067015-155072433	ECtrl	E3KO	OK	1.92452	3.61669	0.910166	1.59158	0.00545	0.0372103	yes	Pex10	2.30797	1.62989	1.39946	5.9166	1.33094	1.56351
XLOC_020280	XLOC_020280	Pex2	3:5560187-5576239	ECtrl	E3KO	OK	9.04195	5.65433	-0.677278	-1.90744	0.0011	0.0102983	yes	Pex2	10.5453	8.93493	6.90291	2.76377	5.81023	6.53251
XLOC_020449	XLOC_020449	Pfn2	3:57841894-57847564	ECtrl	E3KO	OK	24.3886	39.298	0.688246	2.53025	5e-05	0.000724232	yes	Pfn2	24.1828	24.5656	21.8103	35.129	33.8624	34.2815
XLOC_007210	XLOC_007210	Pgf	12:85166638-85177296	ECtrl	E3KO	OK	244.557	162.295	-0.591552	-2.55458	5e-05	0.000724232	yes	Pgf	212.149	192.558	252.813	132.016	157.592	117.771
XLOC_027928	XLOC_027928	Pglyrp1	7:18884689-18890438	ECtrl	E3KO	OK	7.4394	20.6271	1.47128	2.95217	5e-05	0.000724232	yes	Pglyrp1	5.37896	5.49569	9.48083	17.6502	11.9358	22.4825
XLOC_015757	XLOC_015757	Pgm5	19:24683015-24861855	ECtrl	E3KO	OK	39.138	22.4325	-0.80298	-2.67289	5e-05	0.000724232	yes	Pgm5	46.3975	29.8165	30.2323	22.2603	15.4294	15.07
XLOC_034506	XLOC_034506	Phf6	X:52912265-52956943	ECtrl	E3KO	OK	27.815	16.9586	-0.713845	-2.59897	5e-05	0.000724232	yes	Phf6	32.291	28.3104	22.1674	11.7443	18.4102	15.1207
XLOC_003416	XLOC_003416	Pik3ip1	11:3288873-3342971	ECtrl	E3KO	OK	10.9313	4.27977	-1.35287	-1.90298	0.0034	0.0257068	yes	Pik3ip1	9.99083	6.53042	10.9489	1.64259	5.76612	3.15732
XLOC_021909	XLOC_021909	Pik3r3	4:116221617-116303056	ECtrl	E3KO	OK	30.375	53.0178	0.803594	2.51376	5e-05	0.000724232	yes	Pik3r3	21.2587	35.561	30.0347	43.8147	47.4731	47.3553
XLOC_012993	XLOC_012993	Pim1	17:29461895-29495445	ECtrl	E3KO	OK	17.3426	27.5583	0.668166	2.23887	0.0001	0.00134402	yes	Pim1	16.4893	14.7511	15.2316	33.0862	17.6676	17.0132
XLOC_015884	XLOC_015884	Pkd2l1	19:44147636-44192442	ECtrl	E3KO	OK	6.49142	1.42556	-2.18701	-5.20673	5e-05	0.000724232	yes	Pkd2l1	7.40923	4.32778	5.93905	0.55579	2.01317	1.12035
XLOC_019475	XLOC_019475	Pkia	3:7366603-7445366	ECtrl	E3KO	OK	12.7486	7.15928	-0.832457	-2.89165	5e-05	0.000724232	yes	Pkia	13.2356	15.4482	9.68906	3.59137	8.34884	7.48639
XLOC_032694	XLOC_032694	Pkm	9:59656367-59679375	ECtrl	E3KO	OK	249.406	385.622	0.62869	2.662	5e-05	0.000724232	yes	Pkm	167.551	208.82	289.318	249.476	338.737	370.569
XLOC_013240	XLOC_013240	Pla2g7	17:43568097-43612201	ECtrl	E3KO	OK	4.59697	11.2754	1.29442	2.94398	5e-05	0.000724232	yes	Pla2g7	1.39137	5.17397	6.32345	8.71996	9.06537	11.7419
XLOC_030972	XLOC_030972	Plat	8:22757743-22782847	ECtrl	E3KO	OK	56.9273	39.1063	-0.54172	-2.22208	0.00015	0.00192134	yes	Plat	59.5123	36.3808	60.4841	32.4496	40.9086	25.8404
XLOC_015364	XLOC_015364	Plce1	19:38524196-38785098	ECtrl	E3KO	OK	7.39432	2.39318	-1.62749	-5.75306	5e-05	0.000724232	yes	Plce1	8.54297	6.21112	5.9687	2.47509	2.50526	1.15729
XLOC_001812	XLOC_001812	Pld5	1:175962305-176275312	ECtrl	E3KO	OK	7.65698	3.66371	-1.06347	-2.73141	5e-05	0.000724232	yes	Pld5	5.45685	7.35903	8.50092	2.69543	4.05679	2.71763
XLOC_006541	XLOC_006541	Plekhg3	12:76533559-76579039	ECtrl	E3KO	OK	3.89966	2.19436	-0.829552	-2.29185	0.0001	0.00134402	yes	Plekhg3	3.7085	2.73317	4.02736	0.917906	2.51815	2.13511
XLOC_023048	XLOC_023048	Plin2	4:86648385-86670060	ECtrl	E3KO	OK	72.4896	143.928	0.989502	3.01888	5e-05	0.000724232	yes	Plin2	50.7694	63.7445	87.5453	132.089	131.229	114.284
XLOC_028851	XLOC_028851	Plk1	7:122159436-122169875	ECtrl	E3KO	OK	7.79033	2.6558	-1.55254	-3.59507	5e-05	0.000724232	yes	Plk1	9.2645	6.57186	5.12016	1.39573	2.67681	2.722
XLOC_032892	XLOC_032892	Plscr2	9:92275601-92297752	ECtrl	E3KO	OK	16.4977	52.8431	1.67945	5.33838	5e-05	0.000724232	yes	Plscr2	6.17557	22.0731	18.9104	53.6098	37.9997	48.9015
XLOC_032894	XLOC_032894	Plscr4	9:92457377-92493510	ECtrl	E3KO	OK	15.2768	7.62576	-1.00239	-3.41585	5e-05	0.000724232	yes	Plscr4	17.0623	15.5178	13.0688	3.0587	9.29974	8.384
XLOC_016177	XLOC_016177	Plxdc2	2:16356303-16755839	ECtrl	E3KO	OK	1.74502	3.54006	1.02054	1.88228	0.002	0.0167846	yes	Plxdc2	0.576819	2.84083	1.41056	2.20798	3.54955	3.40716
XLOC_014596	XLOC_014596	Pmaip1	18:66458603-66465550	ECtrl	E3KO	OK	11.0694	20.2616	0.872178	3.09978	5e-05	0.000724232	yes	Pmaip1	8.08132	15.0104	9.4613	14.1891	19.3985	20.2649
XLOC_020597	XLOC_020597	Pmf1	3:88394142-88410316	ECtrl	E3KO	OK	8.24436	3.10401	-1.40928	-2.57606	5e-05	0.000724232	yes	Pmf1	10.4145	4.9448	6.73483	0.394083	2.92979	4.62552
XLOC_003947	XLOC_003947	Pmp22	11:63128981-63159547	ECtrl	E3KO	OK	13.8932	21.3775	0.621711	2.03012	0.0003	0.00348276	yes	Pmp22	10.7974	13.1105	15.4642	14.4811	16.5318	25.0828
XLOC_035978	XLOC_035978	Pnck	X:73655993-73660117	ECtrl	E3KO	OK	2.29699	0.756045	-1.6032	-2.04448	0.00025	0.00297984	yes	Pnck	1.9861	1.18385	3.1424	0.429426	0.54984	0.92636
XLOC_026901	XLOC_026901	Podxl	6:31519487-31563981	ECtrl	E3KO	OK	40.3453	20.0962	-1.00548	-4.24178	5e-05	0.000724232	yes	Podxl	41.6709	30.2008	40.8094	15.1236	18.9604	17.8321
XLOC_024460	XLOC_024460	Pole	5:110286305-110337474	ECtrl	E3KO	OK	23.7493	42.5955	0.842819	2.71051	5e-05	0.000724232	yes	Pole	21.9481	19.2379	24.6005	38.56	34.6278	35.3591
XLOC_007098	XLOC_007098	Pole2	12:69201778-69228190	ECtrl	E3KO	OK	4.67611	2.04271	-1.19482	-2.32892	0.0003	0.00348276	yes	Pole2	6.41991	3.65651	3.32968	0	2.41122	3.07815
XLOC_026786	XLOC_026786	Pon3	6:5220851-5256286	ECtrl	E3KO	OK	8.10751	16.6588	1.03895	2.28674	5e-05	0.000724232	yes	Pon3	4.28536	8.33555	9.92337	9.34798	16.0814	18.3236
XLOC_014082	XLOC_014082	Pot1b	17:55652024-55712628	ECtrl	E3KO	OK	2.52682	1.49404	-0.758111	-1.79125	0.00245	0.0197194	yes	Pot1b	2.49915	2.45598	2.17942	0.634289	1.93051	1.36386
XLOC_001715	XLOC_001715	Pou2f1	1:165781074-166002678	ECtrl	E3KO	OK	3.07782	22.7051	2.88304	9.32216	5e-05	0.000724232	yes	Pou2f1	2.55712	3.23699	3.08121	3.20843	2.91556	54.1418
XLOC_011580	XLOC_011580	Pou6f1	15:100575317-100599984	ECtrl	E3KO	OK	6.31552	3.93994	-0.680727	-1.85372	0.00055	0.00580945	yes	Pou6f1	5.73878	5.73067	6.82775	2.27421	4.07007	4.41465
XLOC_026483	XLOC_026483	Pparg	6:115361220-115490401	ECtrl	E3KO	OK	12.2064	19.4548	0.672488	2.25629	0.00035	0.00396199	yes	Pparg	12.8659	12.1268	8.8264	17.1428	16.398	15.9739
XLOC_028475	XLOC_028475	Prc1	7:80294449-80316259	ECtrl	E3KO	OK	30.0754	10.7329	-1.48654	-4.59968	5e-05	0.000724232	yes	Prc1	36.163	27.6235	21.8669	8.74829	9.16851	9.91203
XLOC_028565	XLOC_028565	Prcp	7:92875252-92934573	ECtrl	E3KO	OK	87.3424	141.609	0.697162	3.05192	5e-05	0.000724232	yes	Prcp	66.1922	89.5948	93.3489	111.248	136.847	122.474
XLOC_001675	XLOC_001675	Prdx6	1:161240111-161251219	ECtrl	E3KO	OK	145.539	215.904	0.568981	1.967	0.00035	0.00396199	yes	Prdx6	119.584	121.522	157.076	168.178	175.633	202.51
XLOC_000030	XLOC_000030	Prex2	1:10993464-11303682	ECtrl	E3KO	OK	16.2892	24.6278	0.596369	2.59063	5e-05	0.000724232	yes	Prex2	13.4052	18.455	15.8481	21.6482	20.4027	23.1906
XLOC_002618	XLOC_002618	Prim1	10:128015167-128030037	ECtrl	E3KO	OK	9.31997	3.36348	-1.47037	-3.27061	5e-05	0.000724232	yes	Prim1	10.3388	8.72347	7.22526	0.153444	4.73366	4.11393
XLOC_001086	XLOC_001086	Prim2	1:33453810-33669786	ECtrl	E3KO	OK	7.07293	4.67756	-0.596552	-1.56438	0.00695	0.0449698	yes	Prim2	7.42404	6.21061	6.02984	2.48023	4.92126	4.75931
XLOC_025676	XLOC_025676	Prkar1b	5:139017305-139186510	ECtrl	E3KO	OK	1.13886	8.27258	2.86075	1.60231	0.00045	0.00489747	yes	Prkar1b	0.297737	0.296796	1.85797	15.0457	1.48072	2.50526
XLOC_030395	XLOC_030395	Prkcdbp	7:105480606-105482197	ECtrl	E3KO	OK	20.0552	8.19732	-1.29075	-3.15823	5e-05	0.000724232	yes	Prkcdbp	24.0262	11.1832	17.9069	6.13682	7.5243	6.64504
XLOC_023843	XLOC_023843	Prkcz	4:155260128-155361361	ECtrl	E3KO	OK	28.4925	15.7822	-0.852281	-2.9133	5e-05	0.000724232	yes	Prkcz	31.0395	20.2308	25.9338	11.1856	15.4808	13.113
XLOC_007033	XLOC_007033	Prkd1	12:50341230-50649223	ECtrl	E3KO	OK	7.33382	2.1412	-1.77615	-4.84628	5e-05	0.000724232	yes	Prkd1	9.76862	4.95787	5.8041	1.46413	1.92787	2.12075
XLOC_007748	XLOC_007748	Prl6a1	13:27312626-27319252	ECtrl	E3KO	OK	0.683797	4.13895	2.59763	3.09345	5e-05	0.000724232	yes	Prl6a1	0.730458	0.616602	0.600885	5.84005	1.80709	2.90321
XLOC_017469	XLOC_017469	Procr	2:155751116-155755471	ECtrl	E3KO	OK	168.313	250.332	0.572698	2.46483	5e-05	0.000724232	yes	Procr	109.264	147.326	165.849	177.173	195.37	209.581
XLOC_001886	XLOC_001886	Prox1	1:190118037-190217276	ECtrl	E3KO	OK	141.35	78.8761	-0.841613	-3.54446	5e-05	0.000724232	yes	Prox1	157.975	120.156	131.413	58.0703	79.1911	64.6772
XLOC_036695	XLOC_036695	Prps2	X:167346321-167382749	ECtrl	E3KO	OK	19.8724	30.9908	0.641077	2.21832	5e-05	0.000724232	yes	Prps2	18.4338	21.9709	17.0498	28.2838	25.6934	27.708
XLOC_005699	XLOC_005699	Prr11	11:87089152-87108708	ECtrl	E3KO	OK	8.15336	3.71065	-1.13572	-3.57606	5e-05	0.000724232	yes	Prr11	9.3215	9.19644	5.68698	3.25835	3.03742	3.5575
XLOC_018686	XLOC_018686	Prrg4	2:104830740-104849876	ECtrl	E3KO	OK	11.6289	28.2523	1.28065	2.30151	5e-05	0.000724232	yes	Prrg4	4.0558	13.5885	16.4536	25.866	22.0626	24.5846
XLOC_008336	XLOC_008336	Prss16	13:22002175-22009742	ECtrl	E3KO	OK	1.9233	3.99912	1.0561	1.71624	0.0027	0.0213473	yes	Prss16	2.5629	0.93769	1.61147	5.19378	1.93909	2.24524
XLOC_027926	XLOC_027926	Psg22	7:18718089-18727248	ECtrl	E3KO	OK	7.9423	40.9949	2.36782	7.55806	5e-05	0.000724232	yes	Psg22	1.97716	7.85462	12.119	35.5069	30.8626	38.6999
XLOC_016153	XLOC_016153	Pter	2:12924040-13003453	ECtrl	E3KO	OK	24.5879	37.8193	0.621173	1.63323	0.0037	0.0274592	yes	Pter	21.782	24.8309	20.5029	39.422	27.6197	27.86
XLOC_021062	XLOC_021062	Ptgfr	3:151798917-151837630	ECtrl	E3KO	OK	0.977936	2.31072	1.24053	1.40323	0.0063	0.0416398	yes	Ptgfr	0.621682	1.15028	0.781537	2.27016	1.17311	2.02201
XLOC_020811	XLOC_020811	Ptgfrn	3:101040231-101110278	ECtrl	E3KO	OK	24.2109	13.72	-0.819376	-3.30149	5e-05	0.000724232	yes	Ptgfrn	26.6614	17.869	21.8391	7.17019	14.8169	13.1055
XLOC_000699	XLOC_000699	Ptgs2	1:150100123-150108010	ECtrl	E3KO	OK	2.42823	13.7896	2.50561	7.74496	5e-05	0.000724232	yes	Ptgs2	0.582774	2.92675	3.43766	11.4236	9.15625	15.8517
XLOC_007265	XLOC_007265	Ptpn21	12:98676740-98737405	ECtrl	E3KO	OK	4.91216	3.16735	-0.63308	-1.96362	0.0005	0.00535591	yes	Ptpn21	4.38581	4.13113	5.18605	1.3106	4.0386	2.86927
XLOC_023333	XLOC_023333	Ptprf	4:118208212-118291405	ECtrl	E3KO	OK	5.96183	2.22118	-1.42443	-2.90618	5e-05	0.000724232	yes	Ptprf	7.65221	4.21157	4.83149	1.86162	2.13869	1.84533
XLOC_001306	XLOC_001306	Ptprn	1:75247040-75264208	ECtrl	E3KO	OK	11.6833	7.81563	-0.580009	-1.8773	0.001	0.00952306	yes	Ptprn	7.8868	9.46897	14.124	4.25938	8.26185	7.22718
XLOC_014101	XLOC_014101	Ptprs	17:56412430-56476483	ECtrl	E3KO	OK	2.10035	0.82199	-1.35343	-2.85861	5e-05	0.000724232	yes	Ptprs	2.29605	1.68818	1.62376	0.544842	0.96272	0.565611
XLOC_008485	XLOC_008485	Pxdc1	13:34627839-34652681	ECtrl	E3KO	OK	21.6062	11.4295	-0.91868	-2.55626	5e-05	0.000724232	yes	Pxdc1	19.3755	18.1707	19.0711	6.60899	11.4514	8.81009
XLOC_006229	XLOC_006229	Pycr1	11:120635711-120643769	ECtrl	E3KO	OK	1.76209	3.1762	0.850009	1.46544	0.0061	0.0406133	yes	Pycr1	1.7945	1.64043	1.33261	4.83922	1.96504	0.992736
XLOC_004184	XLOC_004184	Rab34	11:78188429-78192193	ECtrl	E3KO	OK	5.45096	14.1273	1.3739	2.82505	5e-05	0.000724232	yes	Rab34	2.36206	3.23584	9.296	13.2568	10.6	11.9049
XLOC_033269	XLOC_033269	Rab3d	9:21907490-21918192	ECtrl	E3KO	OK	5.81802	2.82518	-1.04219	-2.73292	5e-05	0.000724232	yes	Rab3d	6.34382	4.34591	5.40894	1.96324	2.75742	2.52299
XLOC_015172	XLOC_015172	Rab3il1	19:10001668-10038380	ECtrl	E3KO	OK	25.5509	16.2282	-0.654867	-1.95075	0.0011	0.0102983	yes	Rab3il1	28.4599	15.7522	24.5111	9.32843	16.0817	15.5283
XLOC_032947	XLOC_032947	Rab6b	9:103112073-103185270	ECtrl	E3KO	OK	4.5065	2.28806	-0.977882	-2.75189	5e-05	0.000724232	yes	Rab6b	4.39175	3.17836	5.18826	2.35815	2.07884	1.43028
XLOC_011565	XLOC_011565	Racgap1	15:99620495-99651656	ECtrl	E3KO	OK	20.5269	11.394	-0.849249	-1.81514	0.0001	0.00134402	yes	Racgap1	26.4975	15.7129	14.2942	11.6547	8.25699	8.15716
XLOC_011083	XLOC_011083	Rai14	15:10568978-10714631	ECtrl	E3KO	OK	27.8431	46.242	0.731884	3.14131	5e-05	0.000724232	yes	Rai14	24.189	27.0886	26.3522	35.629	36.9895	45.2206
XLOC_006882	XLOC_006882	Rapgef5	12:117516478-117756978	ECtrl	E3KO	OK	19.1967	29.1244	0.60137	2.46278	5e-05	0.000724232	yes	Rapgef5	13.7107	17.5439	21.9061	26.0162	25.1271	22.9367
XLOC_001216	XLOC_001216	Raph1	1:60483235-60567104	ECtrl	E3KO	OK	41.6128	59.8573	0.524501	2.06715	0.00025	0.00297984	yes	Raph1	30.7725	42.4518	44.5048	42.7372	54.0124	58.0743
XLOC_024225	XLOC_024225	Rasl11b	5:74195295-74199478	ECtrl	E3KO	OK	2.99989	5.82348	0.956974	2.06017	0.00095	0.00913113	yes	Rasl11b	3.87401	2.58717	1.66185	7.91582	2.85353	3.49016
XLOC_000749	XLOC_000749	Rc3h1	1:160906417-160974978	ECtrl	E3KO	OK	17.1498	25.9124	0.595452	1.86436	0.00195	0.0164532	yes	Rc3h1	13.4207	17.0193	18.3536	18.9664	23.1027	24.4458
XLOC_012668	XLOC_012668	Rcan1	16:92391952-92466146	ECtrl	E3KO	OK	51.2139	33.4818	-0.613159	-2.48879	0.0001	0.00134402	yes	Rcan1	48.7401	38.5207	52.4927	22.8462	35.1417	27.4105
XLOC_009644	XLOC_009644	Rcbtb2	14:73123036-73325822	ECtrl	E3KO	OK	37.3933	93.4393	1.32125	2.17863	5e-05	0.000724232	yes	Rcbtb2	28.1262	41.4101	34.0821	61.322	85.7013	95.8576
XLOC_004532	XLOC_004532	Rdm1	11:101627194-101636100	ECtrl	E3KO	OK	4.48205	0.79734	-2.49089	-1.19091	0.00095	0.00913113	yes	Rdm1	5.29331	2.0602	5.5121	0.110328	0.829282	1.1312
XLOC_026265	XLOC_026265	Reep1	6:71707560-71810710	ECtrl	E3KO	OK	32.2114	18.4471	-0.804181	-3.15315	5e-05	0.000724232	yes	Reep1	44.4604	26.0778	20.6749	13.9353	16.949	16.7299
XLOC_014402	XLOC_014402	Reep2	18:34840588-34847463	ECtrl	E3KO	OK	2.30429	4.88125	1.08293	2.22927	0.00055	0.00580945	yes	Reep2	1.50586	2.50842	2.1537	4.08782	3.84073	4.24476
XLOC_027654	XLOC_027654	Rerg	6:137054824-137170497	ECtrl	E3KO	OK	5.44932	10.6344	0.964593	2.72711	5e-05	0.000724232	yes	Rerg	6.90911	3.85288	4.712	12.0098	7.52353	8.20347
XLOC_001593	XLOC_001593	Rgs2	1:143999337-144004161	ECtrl	E3KO	OK	12.0102	22.179	0.884939	1.51348	0.00775	0.0490343	yes	Rgs2	10.9569	10.0782	10.2257	13.4554	11.3577	19.1318
XLOC_028106	XLOC_028106	Rinl	7:28788968-28798963	ECtrl	E3KO	OK	1.03197	2.87295	1.47713	2.76343	5e-05	0.000724232	yes	Rinl	0.621612	1.49916	0.587567	5.00255	0.623068	1.2881
XLOC_010252	XLOC_010252	Ripk3	14:55784995-55788857	ECtrl	E3KO	OK	11.6144	26.4102	1.18518	3.89164	5e-05	0.000724232	yes	Ripk3	6.71977	10.7637	13.965	21.1534	23.0748	22.0432
XLOC_010174	XLOC_010174	Rnase1	14:51145001-51146767	ECtrl	E3KO	OK	1.86832	5.46598	1.54874	2.42216	0.0001	0.00134402	yes	Rnase1	0.696441	1.76994	2.67922	5.48741	3.80317	4.56153
XLOC_006364	XLOC_006364	Rnaseh1	12:28649601-28659591	ECtrl	E3KO	OK	5.11284	2.31282	-1.14447	-2.23831	0.0002	0.00245954	yes	Rnaseh1	4.87429	3.17454	5.69149	0.956528	2.51684	2.39722
XLOC_009572	XLOC_009572	Rnaseh2b	14:62276230-62372992	ECtrl	E3KO	OK	21.2839	11.3354	-0.908929	-2.3295	0.00025	0.00297984	yes	Rnaseh2b	24.5102	18.3334	13.9071	4.94162	12.7634	11.7402
XLOC_014338	XLOC_014338	Rnf125	18:20944624-20983848	ECtrl	E3KO	OK	38.6546	25.6185	-0.593455	-2.16111	0.0004	0.00443257	yes	Rnf125	34.7453	39.14	36.4631	20.0368	25.4312	21.3297
XLOC_007868	XLOC_007868	Rnf144b	13:47122719-47247991	ECtrl	E3KO	OK	5.50798	10.2058	0.889799	3.02787	5e-05	0.000724232	yes	Rnf144b	4.31607	6.51847	4.75917	8.53703	8.26715	9.74277
XLOC_031260	XLOC_031260	Rnf150	8:82863355-83091271	ECtrl	E3KO	OK	2.57438	1.26292	-1.02746	-3.04886	5e-05	0.000724232	yes	Rnf150	2.4555	2.66874	2.19981	0.606441	1.41399	1.29657
XLOC_002837	XLOC_002837	RP24-170A20.3	10:39890017-39899238	ECtrl	E3KO	OK	4.25561	2.5418	-0.743519	-1.93535	0.00105	0.00990498	yes	RP24-170A20.3	4.92844	4.69172	2.40882	1.58406	2.50097	2.52264
XLOC_026806	XLOC_026806	Rpa3	6:8255935-8259173	ECtrl	E3KO	OK	17.7642	8.76334	-1.01942	-2.19078	0.00045	0.00489747	yes	Rpa3	19.5976	17.507	13.7608	2.87219	10.1316	10.1394
XLOC_032970	XLOC_032970	Rpl29	9:106429453-106431568	ECtrl	E3KO	OK	1.93796	4.85934	1.32622	1.68164	0.0056	0.0380159	yes	Rpl29	1.64232	2.3216	1.19987	10.1887	0.239504	0.98986
XLOC_011037	XLOC_011037	Rpl39-ps	15:102634981-102635336	ECtrl	E3KO	OK	17.2234	52.9406	1.62	2.74526	5e-05	0.000724232	yes	Rpl39-ps	80.8825	94.1693	14.1414	105.809	8.37732	13.8333
XLOC_030196	XLOC_030196	Rps13-ps2	7:88530404-88530925	ECtrl	E3KO	OK	1.13078	7.75061	2.77699	2.76004	0.00045	0.00489747	yes	Rps13-ps2	1.51895	0.874244	0.738323	16.8119	1.23474	0.618905
XLOC_034773	XLOC_034773	Rps24-ps3	X:79195046-79195448	ECtrl	E3KO	OK	2.90356	16.4991	2.50649	3.11201	5e-05	0.000724232	yes	Rps24-ps3	2.86526	2.83512	2.34711	33.8615	2.80773	3.5505
XLOC_018323	XLOC_018323	Rps6-ps4	2:75191033-75191854	ECtrl	E3KO	OK	3.45242	9.06135	1.39212	2.28945	0.0001	0.00134402	yes	Rps6-ps4	3.29286	3.10831	3.03919	17.5573	1.9316	2.19979
XLOC_015596	XLOC_015596	Rps6ka4	19:6829084-6840601	ECtrl	E3KO	OK	11.0601	7.11686	-0.636055	-1.96808	0.0009	0.00873141	yes	Rps6ka4	12.6949	8.1604	8.39362	2.96386	8.03695	7.04491
XLOC_002797	XLOC_002797	Rspo3	10:29453108-29535867	ECtrl	E3KO	OK	4.64484	2.64124	-0.814412	-1.95579	0.0014	0.0125573	yes	Rspo3	7.88663	3.28538	2.38514	2.30565	2.38138	2.19524
XLOC_011825	XLOC_011825	Rtp4	16:23609918-23614222	ECtrl	E3KO	OK	8.23478	19.7517	1.26218	3.76443	5e-05	0.000724232	yes	Rtp4	7.22264	4.28736	11.828	23.9475	16.1416	10.6369
XLOC_020647	XLOC_020647	S100a1	3:90511033-90514392	ECtrl	E3KO	OK	13.388	33.6333	1.32895	3.40817	5e-05	0.000724232	yes	S100a1	6.69446	13.5445	15.5153	35.2597	21.676	25.1936
XLOC_002646	XLOC_002646	Sarnp	10:128821770-128877638	ECtrl	E3KO	OK	25.7375	36.6076	0.50827	1.73872	0.00285	0.0223185	yes	Sarnp	25.12	23.9973	21.9003	42.7343	28.7011	20.3278
XLOC_031852	XLOC_031852	Sc4mol	8:64718138-64733792	ECtrl	E3KO	OK	21.4061	33.2917	0.63714	2.03647	0.0003	0.00348276	yes	Sc4mol	25.6826	18.6289	18.1603	22.9379	27.6285	37.4796
XLOC_015886	XLOC_015886	Scd1	19:44394450-44407709	ECtrl	E3KO	OK	1.88844	3.96045	1.06847	2.85672	5e-05	0.000724232	yes	Scd1	0.923697	2.79644	1.61534	2.63766	3.20346	4.52288
XLOC_015639	XLOC_015639	Scgb1a1	19:9083635-9087958	ECtrl	E3KO	OK	1.07777	19.6212	4.18629	5.04758	5e-05	0.000724232	yes	Scgb1a1	1.15445	0	1.8671	46.2439	0	0.654863
XLOC_000193	XLOC_000193	Sdpr	1:51289125-51302959	ECtrl	E3KO	OK	159.308	100.674	-0.662137	-2.86066	5e-05	0.000724232	yes	Sdpr	201.796	125.313	132.945	92.3983	81.034	86.8051
XLOC_000772	XLOC_000772	Selp	1:164115263-164220277	ECtrl	E3KO	OK	29.4473	88.0263	1.5798	5.21217	5e-05	0.000724232	yes	Selp	15.9205	33.7382	30.5518	74.1818	64.6222	82.3518
XLOC_023932	XLOC_023932	Sema3a	5:13396783-13602565	ECtrl	E3KO	OK	84.0209	46.2374	-0.861688	-1.88351	5e-05	0.000724232	yes	Sema3a	67.2576	80.8574	89.5282	26.0781	53.0189	42.1609
XLOC_023930	XLOC_023930	Sema3d	5:12383165-12588943	ECtrl	E3KO	OK	6.75654	1.16108	-2.54082	-7.13383	5e-05	0.000724232	yes	Sema3d	12.0607	4.78322	3.80783	0.988986	1.1418	0.969632
XLOC_009120	XLOC_009120	Sema3g	14:31217859-31230350	ECtrl	E3KO	OK	2.31128	0.499256	-2.21084	-4.12908	5e-05	0.000724232	yes	Sema3g	2.03941	1.44097	2.76703	0.371279	0.5271	0.354191
XLOC_017157	XLOC_017157	Sema6d	2:124089968-124667770	ECtrl	E3KO	OK	8.37059	13.4018	0.679023	2.28937	0.00015	0.00192134	yes	Sema6d	6.03336	8.8769	8.62781	9.90108	11.3944	13.5418
XLOC_006710	XLOC_006710	Serpina3g	12:104236241-104253778	ECtrl	E3KO	OK	0.411867	5.97873	3.85959	4.43358	5e-05	0.000724232	yes	Serpina3g	0.257897	0.704383	0.138972	8.28387	1.75492	4.5442
XLOC_000543	XLOC_000543	Serpinb11	1:107361928-107380475	ECtrl	E3KO	OK	14.0295	6.4741	-1.11571	-3.42887	5e-05	0.000724232	yes	Serpinb11	19.4608	11.4813	9.55431	7.26604	5.0201	4.43511
XLOC_008466	XLOC_008466	Serpinb1a	13:32842091-32851185	ECtrl	E3KO	OK	1.44859	5.5646	1.94162	4.12245	5e-05	0.000724232	yes	Serpinb1a	0.667729	1.13198	2.2071	3.30335	4.20764	6.88885
XLOC_007790	XLOC_007790	Serpinb1b	13:33084124-33094380	ECtrl	E3KO	OK	1.33237	2.78066	1.06144	1.84817	0.0013	0.0118058	yes	Serpinb1b	1.50107	1.7488	0.598716	0.254201	2.52981	4.57058
XLOC_007787	XLOC_007787	Serpinb6b	13:32965208-32979067	ECtrl	E3KO	OK	33.4583	57.1128	0.771453	3.10642	5e-05	0.000724232	yes	Serpinb6b	27.2359	34.4152	32.7418	53.7319	48.0025	46.31
XLOC_007789	XLOC_007789	Serpinb9b	13:33027415-33041884	ECtrl	E3KO	OK	18.5935	39.2231	1.07691	4.28749	5e-05	0.000724232	yes	Serpinb9b	9.77306	17.402	25.4372	23.1148	41.8225	38.6106
XLOC_025639	XLOC_025639	Serpine1	5:137061503-137072272	ECtrl	E3KO	OK	61.5256	143.729	1.22409	5.12073	5e-05	0.000724232	yes	Serpine1	26.4323	77.3863	63.1059	134.206	128.34	99.7955
XLOC_001323	XLOC_001323	Serpine2	1:79794196-79858696	ECtrl	E3KO	OK	103.156	62.7462	-0.71723	-3.05004	5e-05	0.000724232	yes	Serpine2	99.8643	102.622	83.0698	56.5919	57.5458	45.5765
XLOC_002100	XLOC_002100	Sesn1	10:41810573-41908424	ECtrl	E3KO	OK	25.6685	14.7309	-0.801152	-2.94813	5e-05	0.000724232	yes	Sesn1	32.6729	17.8859	21.8481	10.6174	13.867	13.6754
XLOC_003617	XLOC_003617	Sh3pxd2b	11:32347819-32428173	ECtrl	E3KO	OK	25.509	17.102	-0.576836	-2.38453	5e-05	0.000724232	yes	Sh3pxd2b	17.308	23.3275	28.5978	9.15334	19.4497	15.1387
XLOC_031590	XLOC_031590	Shcbp1	8:4735979-4779534	ECtrl	E3KO	OK	7.0537	3.16594	-1.15575	-2.97735	5e-05	0.000724232	yes	Shcbp1	8.95844	6.64754	4.98588	4.08789	2.29996	1.78846
XLOC_036574	XLOC_036574	Shroom2	X:152609508-152769465	ECtrl	E3KO	OK	18.9129	30.6383	0.695962	2.81834	5e-05	0.000724232	yes	Shroom2	15.5791	19.6934	18.0461	24.4618	26.0511	28.3518
XLOC_030714	XLOC_030714	Sigirr	7:141091174-141100546	ECtrl	E3KO	OK	5.02633	2.54779	-0.980259	-2.07894	0.00075	0.007507	yes	Sigirr	5.07654	3.41306	4.97491	1.23839	2.76011	2.45148
XLOC_032248	XLOC_032248	Sipa1l2	8:125418062-125492710	ECtrl	E3KO	OK	6.77887	11.2803	0.734693	2.74481	5e-05	0.000724232	yes	Sipa1l2	4.72494	6.42165	7.21987	8.4144	9.29448	10.7409
XLOC_010288	XLOC_010288	Ska3	14:57806560-57826163	ECtrl	E3KO	OK	5.43905	1.94094	-1.4866	-3.41736	5e-05	0.000724232	yes	Ska3	6.97708	4.26818	4.29914	1.22451	2.01496	1.82841
XLOC_014544	XLOC_014544	Slc12a2	18:57878677-57946821	ECtrl	E3KO	OK	21.0419	32.41	0.623169	2.64637	5e-05	0.000724232	yes	Slc12a2	15.3484	24.4425	21.6825	20.8056	29.8637	35.5027
XLOC_020028	XLOC_020028	Slc16a1	3:104638667-104658462	ECtrl	E3KO	OK	3.14443	4.52211	0.524198	1.53365	0.0075	0.0477652	yes	Slc16a1	3.19307	3.41276	2.60293	2.72449	3.73188	5.55789
XLOC_036227	XLOC_036227	Slc16a2	X:103697413-103821965	ECtrl	E3KO	OK	8.00166	5.37731	-0.573415	-1.72274	0.0024	0.0194009	yes	Slc16a2	8.38916	7.25053	5.23257	4.55425	3.95605	4.17238
XLOC_018958	XLOC_018958	Slc23a2	2:132052495-132220250	ECtrl	E3KO	OK	23.6014	36.4428	0.62676	2.27398	5e-05	0.000724232	yes	Slc23a2	17.6062	21.3276	27.6381	27.5683	35.0613	33.3837
XLOC_033585	XLOC_033585	Slc24a1	9:64922860-64951607	ECtrl	E3KO	OK	2.16728	5.1472	1.2479	3.8123	5e-05	0.000724232	yes	Slc24a1	1.53436	2.08304	2.26814	3.75587	4.72063	4.47814
XLOC_023792	XLOC_023792	Slc25a33	4:149744035-149774277	ECtrl	E3KO	OK	3.50351	5.98415	0.772344	1.6703	0.0052	0.0358848	yes	Slc25a33	4.31138	3.43345	2.04511	7.04276	4.31177	3.66875
XLOC_003991	XLOC_003991	Slc25a35	11:68968130-68975185	ECtrl	E3KO	OK	4.46648	1.85923	-1.26443	-2.14674	0.00035	0.00396199	yes	Slc25a35	5.3662	3.67454	3.50208	0.52753	1.9927	2.40394
XLOC_011487	XLOC_011487	Slc2a13	15:91267695-91573261	ECtrl	E3KO	OK	12.7107	5.23985	-1.27845	-3.75974	5e-05	0.000724232	yes	Slc2a13	12.6022	13.2083	11.6696	3.00813	6.96182	4.11078
XLOC_025073	XLOC_025073	Slc2a9	5:38349272-38503143	ECtrl	E3KO	OK	4.80128	9.55773	0.993248	2.51921	5e-05	0.000724232	yes	Slc2a9	3.21777	4.32815	5.40344	8.65389	8.67382	6.82086
XLOC_021552	XLOC_021552	Slc31a1	4:62360726-62408642	ECtrl	E3KO	OK	40.6202	67.4879	0.732432	2.94921	5e-05	0.000724232	yes	Slc31a1	39.4814	42.5887	35.4265	53.1679	59.9156	65.6214
XLOC_008670	XLOC_008670	Slc35d2	13:64096309-64129330	ECtrl	E3KO	OK	5.3568	3.43546	-0.640868	-1.62968	0.0046	0.0326234	yes	Slc35d2	4.62199	6.4299	4.36589	3.14243	2.95181	2.89045
XLOC_033348	XLOC_033348	Slc37a2	9:37229148-37255738	ECtrl	E3KO	OK	1.38528	4.06515	1.55313	2.41659	5e-05	0.000724232	yes	Slc37a2	0.398306	1.77436	1.62113	3.71091	3.24781	3.37813
XLOC_011515	XLOC_011515	Slc38a4	15:96994822-97055956	ECtrl	E3KO	OK	29.4933	16.44	-0.843175	-2.50418	5e-05	0.000724232	yes	Slc38a4	36.102	21.3111	25.8391	17.4248	13.296	11.4713
XLOC_001155	XLOC_001155	Slc39a10	1:46807543-46854046	ECtrl	E3KO	OK	18.4123	27.5174	0.579678	1.81157	0.0029	0.0226265	yes	Slc39a10	14.8623	19.4333	19.1127	23.4262	23.9618	24.5035
XLOC_020178	XLOC_020178	Slc39a8	3:135825278-135888572	ECtrl	E3KO	OK	2.01313	5.27925	1.39089	3.41148	5e-05	0.000724232	yes	Slc39a8	1.37486	3.02397	1.42933	6.17222	3.64105	3.76095
XLOC_021474	XLOC_021474	Slc44a1	4:53440412-53622478	ECtrl	E3KO	OK	27.7684	17.5492	-0.662037	-2.00732	0.0007	0.00709513	yes	Slc44a1	25.7423	27.0061	27.6044	10.9383	18.9601	16.105
XLOC_000609	XLOC_000609	Slc45a3	1:131962966-131982963	ECtrl	E3KO	OK	85.6415	34.4526	-1.3137	-5.37962	5e-05	0.000724232	yes	Slc45a3	99.5033	49.5572	70.3461	26.4087	33.2449	21.7563
XLOC_018938	XLOC_018938	Slc4a11	2:130684112-130697519	ECtrl	E3KO	OK	0.85372	2.76095	1.69333	1.85556	0.001	0.00952306	yes	Slc4a11	0.657344	0.787661	0.887114	3.07871	1.74696	2.05336
XLOC_010781	XLOC_010781	Slc52a2	15:76538942-76542130	ECtrl	E3KO	OK	1.41738	2.61348	0.882747	1.6169	0.0057	0.0385329	yes	Slc52a2	1.35584	1.03191	1.49165	4.02922	1.05713	1.30681
XLOC_025760	XLOC_025760	Slc7a1	5:148327409-148399904	ECtrl	E3KO	OK	10.6875	6.78502	-0.655498	-2.4644	5e-05	0.000724232	yes	Slc7a1	9.86598	9.77887	10.0273	5.56654	6.57201	5.14178
XLOC_020417	XLOC_020417	Slc7a11	3:50364935-50443613	ECtrl	E3KO	OK	1.41257	5.4394	1.94513	6.082	5e-05	0.000724232	yes	Slc7a11	0.764751	1.7673	1.59344	3.59258	4.69387	6.33732
XLOC_032946	XLOC_032946	Slco2a1	9:103008488-103087849	ECtrl	E3KO	OK	0.969915	7.16981	2.886	6.01588	5e-05	0.000724232	yes	Slco2a1	0.33842	0.977682	1.33372	4.89282	4.89466	8.37818
XLOC_030256	XLOC_030256	Slco2b1	7:99657803-99711340	ECtrl	E3KO	OK	2.48785	5.29778	1.09049	2.85086	5e-05	0.000724232	yes	Slco2b1	2.45589	1.82335	2.65384	4.65131	4.21248	4.68841
XLOC_004244	XLOC_004244	Slfn5	11:82910549-82962941	ECtrl	E3KO	OK	41.9951	70.8235	0.754006	2.46816	0.0001	0.00134402	yes	Slfn5	25.2362	37.7104	56.0185	62.0938	70.2782	57.1272
XLOC_024132	XLOC_024132	Slit2	5:47983154-48306282	ECtrl	E3KO	OK	4.15268	17.9535	2.11215	3.35933	5e-05	0.000724232	yes	Slit2	1.51255	5.46207	4.41439	22.2864	10.3427	11.6833
XLOC_009726	XLOC_009726	Slitrk5	14:111675114-111683134	ECtrl	E3KO	OK	2.29535	0.73303	-1.64677	-3.3245	5e-05	0.000724232	yes	Slitrk5	2.44157	2.04881	2.06452	0.115265	0.993785	0.832231
XLOC_011582	XLOC_011582	Smagp	15:100621341-100636865	ECtrl	E3KO	OK	14.3253	3.39308	-2.0779	-4.03557	5e-05	0.000724232	yes	Smagp	21.1661	6.62936	10.9912	3.53583	2.16508	2.70277
XLOC_023383	XLOC_023383	Smap2	4:120968316-121017247	ECtrl	E3KO	OK	31.2094	48.3843	0.632558	2.6051	5e-05	0.000724232	yes	Smap2	29.2554	29.6594	27.1888	37.502	39.8614	46.531
XLOC_006568	XLOC_006568	Smoc1	12:81026807-81186414	ECtrl	E3KO	OK	0.965143	6.26616	2.69877	5.60712	5e-05	0.000724232	yes	Smoc1	0.538913	0.804491	1.30276	5.50518	4.80043	5.54014
XLOC_020301	XLOC_020301	Snx16	3:10417818-10440124	ECtrl	E3KO	OK	3.69426	6.61674	0.840837	2.26809	5e-05	0.000724232	yes	Snx16	4.02077	4.18915	2.82656	10.8086	3.43746	3.04418
XLOC_015927	XLOC_015927	Sorcs1	19:50143300-50778662	ECtrl	E3KO	OK	17.6234	10.6037	-0.732928	-2.31774	5e-05	0.000724232	yes	Sorcs1	18.7785	15.9952	20.8506	7.73845	12.6527	9.56312
XLOC_000975	XLOC_000975	Sox17	1:4490927-4496413	ECtrl	E3KO	OK	4.61349	8.29994	0.847242	2.09991	0.00035	0.00396199	yes	Sox17	2.79701	3.55162	3.07667	3.67216	4.14328	6.13106
XLOC_000405	XLOC_000405	Sp100	1:85600377-85709998	ECtrl	E3KO	OK	2.37765	6.41779	1.43254	2.36006	5e-05	0.000724232	yes	Sp100	3.32196	2.89675	3.06963	11.4817	3.05939	3.54851
XLOC_004189	XLOC_004189	Spag5	11:78301528-78322457	ECtrl	E3KO	OK	5.81812	2.47104	-1.23543	-2.72705	5e-05	0.000724232	yes	Spag5	5.32329	5.95178	3.83057	2.00908	2.09231	2.12363
XLOC_017150	XLOC_017150	Spata5l1	2:122630624-122632930	ECtrl	E3KO	OK	4.31332	1.93942	-1.15318	-1.74157	0.00395	0.0289109	yes	Spata5l1	5.5363	3.07274	2.70531	0.0386245	2.87785	2.12642
XLOC_018271	XLOC_018271	Spc25	2:69193894-69206194	ECtrl	E3KO	OK	14.3082	7.17144	-0.996506	-2.64658	5e-05	0.000724232	yes	Spc25	19.2445	12.7684	9.98671	3.07618	8.44563	7.90168
XLOC_005497	XLOC_005497	Spns2	11:72441354-72489904	ECtrl	E3KO	OK	56.6474	82.8674	0.548794	1.73319	0.00235	0.0190851	yes	Spns2	52.5055	46.8484	52.6508	73.8895	65.7849	66.6328
XLOC_024398	XLOC_024398	Spp1	5:104435117-104441050	ECtrl	E3KO	OK	44.7926	90.2078	1.00999	3.67175	5e-05	0.000724232	yes	Spp1	22.3279	46.5554	54.9236	58.9374	74.1174	99.2526
XLOC_029535	XLOC_029535	Spred3	7:29158828-29169841	ECtrl	E3KO	OK	17.753	26.2808	0.56595	2.16348	5e-05	0.000724232	yes	Spred3	16.2293	22.1472	20.4802	29.255	24.3699	25.6549
XLOC_010706	XLOC_010706	Sqle	15:59315076-59331192	ECtrl	E3KO	OK	11.3259	19.9155	0.814265	2.8525	5e-05	0.000724232	yes	Sqle	12.0016	11.5449	8.098	12.4162	13.9329	25.0535
XLOC_028905	XLOC_028905	Srcap	7:127512026-127536376	ECtrl	E3KO	OK	7.41212	12.663	0.772663	1.72777	0.0033	0.025098	yes	Srcap	6.38714	8.22622	8.73789	7.13303	8.48996	9.01283
XLOC_024233	XLOC_024233	Srd5a3	5:76140270-76155504	ECtrl	E3KO	OK	52.211	35.7331	-0.547091	-1.99682	0.00075	0.007507	yes	Srd5a3	50.8159	42.1926	54.9158	23.8028	37.785	32.2354
XLOC_002942	XLOC_002942	Srgn	10:62493832-62527451	ECtrl	E3KO	OK	6.70545	12.9179	0.945967	1.68014	0.0032	0.02448	yes	Srgn	3.33683	4.55187	10.9532	13.6261	9.17647	14.2686
XLOC_024242	XLOC_024242	Srp72	5:76974682-76999937	ECtrl	E3KO	OK	82.7363	121.325	0.552284	1.8503	0.0018	0.0154292	yes	Srp72	68.1204	87.0634	79.5247	105.025	100.804	109.319
XLOC_030470	XLOC_030470	St5	7:109523910-109617147	ECtrl	E3KO	OK	8.41533	3.44818	-1.28719	-3.59081	5e-05	0.000724232	yes	St5	8.00412	7.11323	7.98954	2.06505	3.66733	3.09942
XLOC_003147	XLOC_003147	Stab2	10:86839093-87028015	ECtrl	E3KO	OK	8.94785	143.154	3.99988	4.67638	5e-05	0.000724232	yes	Stab2	5.29621	6.48053	13.2873	138.712	106.156	126.039
XLOC_033891	XLOC_033891	Stac	9:111561436-111690348	ECtrl	E3KO	OK	2.20675	0.782178	-1.49635	-2.38968	0.0001	0.00134402	yes	Stac	3.02068	1.55015	1.35311	0.494068	0.98428	0.517577
XLOC_005951	XLOC_005951	Stat5b	11:100780730-100850724	ECtrl	E3KO	OK	8.15533	5.67614	-0.522835	-1.76601	0.00245	0.0197194	yes	Stat5b	7.7694	6.60276	7.83789	4.5295	5.24859	5.04601
XLOC_009620	XLOC_009620	Stc1	14:69029288-69041401	ECtrl	E3KO	OK	36.5654	11.0603	-1.72508	-6.63346	5e-05	0.000724232	yes	Stc1	34.9165	27.0583	44.3097	5.04152	14.1421	10.3803
XLOC_024868	XLOC_024868	Steap1	5:5736316-5749326	ECtrl	E3KO	OK	3.59792	9.76467	1.44041	3.01516	5e-05	0.000724232	yes	Steap1	1.85084	4.55522	3.7743	8.75096	6.11393	10.3721
XLOC_024867	XLOC_024867	Steap2	5:5664830-5694578	ECtrl	E3KO	OK	9.67705	23.8125	1.29908	4.03884	5e-05	0.000724232	yes	Steap2	5.97673	10.8551	10.4758	19.0566	18.2251	24.1101
XLOC_019479	XLOC_019479	Stmn2	3:8509526-8561604	ECtrl	E3KO	OK	6.86721	10.283	0.582471	1.66375	0.00435	0.031197	yes	Stmn2	2.35411	7.83537	8.98232	4.37845	10.2079	12.0707
XLOC_030798	XLOC_030798	Stxbp2	8:3630954-3643644	ECtrl	E3KO	OK	5.26007	14.153	1.42795	2.01977	5e-05	0.000724232	yes	Stxbp2	2.09305	5.29035	7.28421	19.6339	7.31446	9.81711
XLOC_026481	XLOC_026481	Syn2	6:115134901-115282626	ECtrl	E3KO	OK	6.08187	9.69832	0.673221	2.19428	0.00015	0.00192134	yes	Syn2	6.12587	5.74981	5.06902	10.4218	7.25844	6.94218
XLOC_002691	XLOC_002691	Syne1	10:5020202-5069063	ECtrl	E3KO	OK	6.93115	4.74757	-0.545906	-1.86987	0.001	0.00952306	yes	Syne1	6.74162	5.80537	6.50731	2.91378	5.20212	4.04588
XLOC_006534	XLOC_006534	Syne2	12:75818133-76110926	ECtrl	E3KO	OK	2.65961	1.0263	-1.37377	-1.13772	0.00575	0.0388058	yes	Syne2	2.18989	1.20996	4.39025	0.487021	1.22931	0.948886
XLOC_024063	XLOC_024063	Tacc3	5:33658127-33678995	ECtrl	E3KO	OK	28.3826	12.1217	-1.22741	-3.05216	5e-05	0.000724232	yes	Tacc3	29.2881	20.4153	27.323	9.03845	10.3279	10.9941
XLOC_014834	XLOC_014834	Taf7	18:37640901-37644204	ECtrl	E3KO	OK	2.01145	3.4546	0.780283	1.88459	0.00135	0.0121853	yes	Taf7	2.48578	1.64471	1.74074	3.71288	2.53403	2.72101
XLOC_024154	XLOC_024154	Tbc1d19	5:53809626-53904380	ECtrl	E3KO	OK	16.8271	11.8037	-0.511545	-1.79011	0.00225	0.0184493	yes	Tbc1d19	18.1989	17.457	13.9503	5.71202	12.7655	13.2388
XLOC_035516	XLOC_035516	Tbc1d25	X:8154471-8176181	ECtrl	E3KO	OK	5.01145	2.48696	-1.01084	-2.25499	0.0003	0.00348276	yes	Tbc1d25	4.35091	3.02551	6.46575	1.3385	2.16147	2.81708
XLOC_003300	XLOC_003300	Tbc1d30	10:121263823-121311189	ECtrl	E3KO	OK	2.48979	1.03629	-1.26459	-3.02958	5e-05	0.000724232	yes	Tbc1d30	3.15656	1.80648	2.01388	0.516737	1.17571	1.00452
XLOC_031261	XLOC_031261	Tbc1d9	8:83165080-83272934	ECtrl	E3KO	OK	29.9324	18.3982	-0.702143	-2.33836	5e-05	0.000724232	yes	Tbc1d9	25.6392	27.7065	28.3232	13.3048	19.0004	14.6982
XLOC_012287	XLOC_012287	Tbx1	16:18581712-18586969	ECtrl	E3KO	OK	43.1369	26.904	-0.681102	-2.32038	5e-05	0.000724232	yes	Tbx1	54.7375	27.6071	33.5541	25.1753	21.5642	19.9208
XLOC_026827	XLOC_026827	Tfec	6:16833380-16898441	ECtrl	E3KO	OK	0.780293	5.75646	2.88309	4.90037	5e-05	0.000724232	yes	Tfec	0.319087	0.74733	1.09775	4.28706	4.17067	6.31235
XLOC_018373	XLOC_018373	Tfpi	2:84432854-84476775	ECtrl	E3KO	OK	67.4305	114.358	0.762086	2.85006	5e-05	0.000724232	yes	Tfpi	58.7095	67.1844	61.569	101.831	94.3392	94.0628
XLOC_026779	XLOC_026779	Tfpi2	6:3962593-3968375	ECtrl	E3KO	OK	47.6961	224.637	2.23565	9.10884	5e-05	0.000724232	yes	Tfpi2	31.8823	66.3954	42.6031	187.183	186.213	226.027
XLOC_028928	XLOC_028928	Tgfb1i1	7:128246811-128253712	ECtrl	E3KO	OK	21.0778	14.7413	-0.515863	-1.60442	0.00725	0.0465035	yes	Tgfb1i1	19.4938	17.8168	19.2701	15.9455	11.9235	9.0906
XLOC_001874	XLOC_001874	Tgfb2	1:186623185-186705992	ECtrl	E3KO	OK	18.288	11.2365	-0.702712	-2.70709	5e-05	0.000724232	yes	Tgfb2	18.0499	19.1729	16.1024	11.903	9.6146	7.66451
XLOC_007218	XLOC_007218	Tgfb3	12:85824658-86079041	ECtrl	E3KO	OK	19.2718	12.0996	-0.671529	-1.95771	0.0012	0.0110638	yes	Tgfb3	19.6362	14.2959	18.9513	8.47723	11.8634	10.4673
XLOC_004465	XLOC_004465	Thra	11:98740637-98775333	ECtrl	E3KO	OK	24.7656	16.025	-0.628018	-1.77448	0.00235	0.0190851	yes	Thra	22.6828	17.4678	21.75	10.3041	15.5933	13.0153
XLOC_032555	XLOC_032555	Thy1	9:44043383-44048579	ECtrl	E3KO	OK	299.724	146.497	-1.03276	-4.43716	5e-05	0.000724232	yes	Thy1	329.925	226.548	260.681	142.324	133.059	94.4196
XLOC_023499	XLOC_023499	Tinagl1	4:130164453-130175122	ECtrl	E3KO	OK	22.6529	38.3762	0.76052	2.65549	5e-05	0.000724232	yes	Tinagl1	19.4346	18.0882	23.4811	31.3827	28.8967	36.2806
XLOC_030048	XLOC_030048	Tjp1	7:65296164-65371239	ECtrl	E3KO	OK	152.447	261.153	0.776585	1.95894	0.00015	0.00192134	yes	Tjp1	90.8397	149.501	139.236	234.557	198.223	208.646
XLOC_031849	XLOC_031849	Tll1	8:64014769-64205993	ECtrl	E3KO	OK	3.00006	11.7534	1.97001	6.47866	5e-05	0.000724232	yes	Tll1	1.60886	3.54906	3.2147	10.2964	8.72766	11.0443
XLOC_021581	XLOC_021581	Tlr4	4:66827583-66930284	ECtrl	E3KO	OK	13.5121	25.0218	0.888933	2.52381	0.0001	0.00134402	yes	Tlr4	6.14428	18.8981	14.2717	17.9772	19.7931	29.0661
XLOC_004350	XLOC_004350	Tmem100	11:90030347-90036508	ECtrl	E3KO	OK	9.46881	5.43719	-0.800322	-2.11575	0.00025	0.00297984	yes	Tmem100	13.7426	7.84839	5.61207	5.01922	4.75613	4.28149
XLOC_015660	XLOC_015660	Tmem132a	19:10839726-10869940	ECtrl	E3KO	OK	3.69403	1.38036	-1.42015	-2.42799	0.0002	0.00245954	yes	Tmem132a	3.5956	2.49923	3.62474	0.665525	1.47925	1.30312
XLOC_035216	XLOC_035216	Tmem164	X:142681405-142843494	ECtrl	E3KO	OK	37.2072	61.394	0.722516	1.83721	0.00405	0.0294993	yes	Tmem164	35.5261	30.0254	36.8402	63.9368	48.1028	44.4984
XLOC_032204	XLOC_032204	Tmem170	8:111864897-111876675	ECtrl	E3KO	OK	5.58273	10.3735	0.893863	2.35206	0.00015	0.00192134	yes	Tmem170	4.87051	5.8093	5.3206	14.1357	6.36181	6.10311
XLOC_026091	XLOC_026091	Tmem176a	6:48841482-48845364	ECtrl	E3KO	OK	66.3902	119.308	0.845652	3.27605	5e-05	0.000724232	yes	Tmem176a	52.5807	62.0001	64.4749	103.215	91.537	104.037
XLOC_027008	XLOC_027008	Tmem176b	6:48833810-48841374	ECtrl	E3KO	OK	125.468	226.472	0.852016	3.60616	5e-05	0.000724232	yes	Tmem176b	106.211	112.517	117.941	208.634	175.862	179.647
XLOC_000157	XLOC_000157	Tmem182	1:40805600-40855944	ECtrl	E3KO	OK	0.513066	2.35193	2.19663	2.80553	5e-05	0.000724232	yes	Tmem182	0.328291	1.07851	0.0567554	4.17266	1.12957	0.662752
XLOC_005595	XLOC_005595	Tmem199	11:78507054-78512172	ECtrl	E3KO	OK	31.4215	49.239	0.648047	1.915	0.0019	0.0161162	yes	Tmem199	30.9219	25.9852	30.1844	45.4037	36.9808	42.3195
XLOC_007158	XLOC_007158	Tmem229b	12:78961794-79007627	ECtrl	E3KO	OK	4.14178	2.28258	-0.859584	-1.9775	0.00035	0.00396199	yes	Tmem229b	3.91641	3.26619	4.22533	0.960021	2.614	2.40911
XLOC_002221	XLOC_002221	Tmem26	10:68723745-68782654	ECtrl	E3KO	OK	19.7095	12.5254	-0.654028	-2.57988	5e-05	0.000724232	yes	Tmem26	23.8937	17.072	16.5813	7.80878	13.4145	11.9653
XLOC_001471	XLOC_001471	Tmem37	1:120067376-120074074	ECtrl	E3KO	OK	1.38061	3.12572	1.17888	1.65266	0.00765	0.0485231	yes	Tmem37	1.04824	0.990107	1.79442	2.85754	2.34522	2.64478
XLOC_023954	XLOC_023954	Tmem60	5:20882190-20886870	ECtrl	E3KO	OK	24.1075	14.6265	-0.720897	-2.01925	0.0007	0.00709513	yes	Tmem60	24.626	22.8816	21.8428	3.61559	17.9004	17.4038
XLOC_011250	XLOC_011250	Tmem71	15:66526211-66561046	ECtrl	E3KO	OK	4.93829	2.85908	-0.788461	-2.0949	0.00055	0.00580945	yes	Tmem71	5.02147	4.85691	4.75771	3.71415	2.3035	1.49255
XLOC_033651	XLOC_033651	Tmod2	9:75565620-75611325	ECtrl	E3KO	OK	28.6052	9.73032	-1.55572	-5.70493	5e-05	0.000724232	yes	Tmod2	27.186	25.649	30.4143	7.58074	10.2018	7.57325
XLOC_027716	XLOC_027716	Tmtc1	6:148232429-148444389	ECtrl	E3KO	OK	4.69777	1.96136	-1.26012	-3.79927	5e-05	0.000724232	yes	Tmtc1	7.34442	3.00667	3.25043	2.84092	1.46328	0.874512
XLOC_033499	XLOC_033499	Tnfaip8l3	9:54025605-54068411	ECtrl	E3KO	OK	13.9129	6.06466	-1.19793	-3.66524	5e-05	0.000724232	yes	Tnfaip8l3	17.706	11.2389	11.1311	4.77938	5.97292	5.08133
XLOC_009628	XLOC_009628	Tnfrsf10b	14:69767471-69784403	ECtrl	E3KO	OK	66.3834	105.654	0.670453	2.90021	5e-05	0.000724232	yes	Tnfrsf10b	50.8148	66.9861	69.2224	67.6999	102.294	104.227
XLOC_000534	XLOC_000534	Tnfrsf11a	1:105780722-105847981	ECtrl	E3KO	OK	5.04733	3.3033	-0.611612	-1.84694	0.00125	0.0114398	yes	Tnfrsf11a	7.21178	4.24316	3.0041	2.83605	2.9519	2.80121
XLOC_030769	XLOC_030769	Tnfrsf26	7:143607684-143627845	ECtrl	E3KO	OK	36.7687	59.8399	0.702631	2.94404	5e-05	0.000724232	yes	Tnfrsf26	25.461	45.5565	33.7949	52.6913	47.5086	56.396
XLOC_019532	XLOC_019532	Tnfsf10	3:27317027-27342427	ECtrl	E3KO	OK	2.45364	0.91945	-1.41608	-3.04382	5e-05	0.000724232	yes	Tnfsf10	1.92842	2.78017	2.36158	0.361502	1.15172	0.941943
XLOC_029042	XLOC_029042	Tnnt3	7:142460808-142516009	ECtrl	E3KO	OK	0.268481	5.41646	4.33446	1.43584	5e-05	0.000724232	yes	Tnnt3	0.198585	0	0.532832	12.1859	0.0759667	0.217508
XLOC_022805	XLOC_022805	Tomm5	4:45105207-45108114	ECtrl	E3KO	OK	74.5599	128.473	0.784987	2.84257	5e-05	0.000724232	yes	Tomm5	72.3604	70.2196	64.773	134.344	97.2474	92.0483
XLOC_005848	XLOC_005848	Top2a	11:98992942-99024189	ECtrl	E3KO	OK	40.9923	17.2877	-1.24561	-3.0684	5e-05	0.000724232	yes	Top2a	59.6122	34.0185	32.0735	17.5631	13.7992	15.6453
XLOC_002808	XLOC_002808	Tpd52l1	10:31332379-31445921	ECtrl	E3KO	OK	2.57586	5.91419	1.19913	2.34422	5e-05	0.000724232	yes	Tpd52l1	2.45835	2.64399	2.04291	8.23647	2.97806	3.44302
XLOC_009728	XLOC_009728	Tpm3-rs7	14:113314607-113316713	ECtrl	E3KO	OK	1.0123	2.81515	1.47557	2.53134	5e-05	0.000724232	yes	Tpm3-rs7	0.658379	1.22714	0.916956	5.47008	0.699381	0.565486
XLOC_024658	XLOC_024658	Tpst1	5:130073325-130135729	ECtrl	E3KO	OK	33.1814	22.5078	-0.559949	-2.0708	0.0003	0.00348276	yes	Tpst1	37.8141	27.5528	26.0966	18.9803	19.3658	19.1549
XLOC_027373	XLOC_027373	Tpt1-ps3	6:99877746-99878433	ECtrl	E3KO	OK	9.50578	42.6765	2.16657	4.81762	5e-05	0.000724232	yes	Tpt1-ps3	7.41941	12.1774	7.70865	88.3831	6.88066	8.18933
XLOC_017415	XLOC_017415	Tpx2	2:152847963-152895321	ECtrl	E3KO	OK	21.3217	11.5253	-0.887518	-2.41043	0.00025	0.00297984	yes	Tpx2	22.8415	19.3401	17.521	10.9595	8.81617	9.27714
XLOC_001048	XLOC_001048	Tram2	1:20996295-21079229	ECtrl	E3KO	OK	8.56579	5.42073	-0.660099	-2.3458	5e-05	0.000724232	yes	Tram2	7.62739	7.65657	8.64406	2.77364	5.99239	5.37658
XLOC_019104	XLOC_019104	Trib3	2:152337421-152344032	ECtrl	E3KO	OK	40.9772	24.8997	-0.718695	-2.61562	5e-05	0.000724232	yes	Trib3	43.489	27.6216	36.9547	12.1505	25.564	24.2026
XLOC_027045	XLOC_027045	Tril	6:53815470-53820825	ECtrl	E3KO	OK	10.3259	5.39939	-0.935395	-3.10741	5e-05	0.000724232	yes	Tril	14.983	7.24325	6.98475	5.1425	4.73083	3.9238
XLOC_013738	XLOC_013738	Trp53cor1	17:29057473-29078961	ECtrl	E3KO	OK	3.46121	5.86073	0.759802	2.0757	0.0003	0.00348276	yes	Trp53cor1	2.43054	3.41829	3.70276	6.53971	4.0357	4.20227
XLOC_007010	XLOC_007010	Tspan13	12:36014556-36042500	ECtrl	E3KO	OK	84.1392	45.9982	-0.871201	-3.50353	5e-05	0.000724232	yes	Tspan13	108.474	71.1394	65.0019	30.0961	43.058	47.583
XLOC_002937	XLOC_002937	Tspan15	10:62185395-62231218	ECtrl	E3KO	OK	5.79405	3.83367	-0.595845	-1.72267	0.00275	0.0216705	yes	Tspan15	6.82871	5.13554	4.2193	2.00335	3.92666	4.01068
XLOC_021851	XLOC_021851	Ttc39a	4:109406622-109444745	ECtrl	E3KO	OK	3.18659	1.04359	-1.61045	-1.80492	0.00025	0.00297984	yes	Ttc39a	3.24755	2.12473	3.31071	0.827	1.00364	0.815562
XLOC_010162	XLOC_010162	Ttc5	14:50765414-50785518	ECtrl	E3KO	OK	21.6564	14.1928	-0.609629	-2.04709	0.00045	0.00489747	yes	Ttc5	21.9053	16.9336	19.5758	5.68633	16.6174	14.1081
XLOC_032845	XLOC_032845	Ttk	9:83834688-83872390	ECtrl	E3KO	OK	4.65523	1.39792	-1.73557	-4.00662	5e-05	0.000724232	yes	Ttk	5.72247	4.55991	3.06562	0.633767	1.67746	1.36699
XLOC_027753	XLOC_027753	Ttyh1	7:4074124-4136926	ECtrl	E3KO	OK	3.02356	5.4296	0.844597	1.70412	0.0004	0.00443257	yes	Ttyh1	3.12776	2.01881	3.33608	6.26924	4.04049	3.78255
XLOC_028772	XLOC_028772	Tub	7:109010824-109083331	ECtrl	E3KO	OK	2.39036	0.883148	-1.4365	-2.31097	0.00015	0.00192134	yes	Tub	3.9286	1.40924	1.33469	0.635953	0.87526	0.747952
XLOC_008482	XLOC_008482	Tubb2b	13:34127007-34130354	ECtrl	E3KO	OK	8.37944	3.67328	-1.18978	-2.9012	5e-05	0.000724232	yes	Tubb2b	6.41841	6.96074	9.20594	1.27573	4.76851	3.39488
XLOC_033396	XLOC_033396	Ubash3b	9:41011097-41161697	ECtrl	E3KO	OK	9.29669	5.12703	-0.858593	-2.15657	5e-05	0.000724232	yes	Ubash3b	10.5907	5.59763	9.4688	3.38346	5.51484	4.19332
XLOC_017577	XLOC_017577	Ube2c	2:164769897-164779967	ECtrl	E3KO	OK	72.4813	28.8277	-1.33015	-3.92299	5e-05	0.000724232	yes	Ube2c	84.864	59.4362	59.7476	17.4632	27.509	29.8243
XLOC_000648	XLOC_000648	Ube2t	1:134962564-134974162	ECtrl	E3KO	OK	4.41323	0.973071	-2.18122	-3.04159	5e-05	0.000724232	yes	Ube2t	6.23459	3.09537	3.07191	0.13648	1.35673	1.08237
XLOC_023636	XLOC_023636	Ubxn10	4:138709836-138746132	ECtrl	E3KO	OK	1.15722	3.2031	1.46881	2.08568	0.00115	0.0106752	yes	Ubxn10	1.14347	0.738979	1.32342	5.00956	1.01575	1.86024
XLOC_013338	XLOC_013338	Uhrf1	17:56303320-56323486	ECtrl	E3KO	OK	3.22613	1.37568	-1.22966	-1.77026	0.0006	0.0062413	yes	Uhrf1	3.8841	2.80598	2.34146	0.240783	1.21096	2.02322
XLOC_002700	XLOC_002700	Ulbp1	10:7444872-7473477	ECtrl	E3KO	OK	15.5606	22.5486	0.535137	1.82797	0.00205	0.0171154	yes	Ulbp1	8.24103	20.9655	14.6438	16.841	18.6792	22.8823
XLOC_021370	XLOC_021370	Unc13b	4:43058952-43264871	ECtrl	E3KO	OK	9.0547	4.47038	-1.01827	-2.67033	5e-05	0.000724232	yes	Unc13b	7.81664	6.19654	9.69934	4.10195	3.78383	3.31869
XLOC_003479	XLOC_003479	Upp1	11:9118102-9136170	ECtrl	E3KO	OK	46.5658	67.0002	0.524896	1.66557	0.0047	0.0331644	yes	Upp1	35.1042	38.7668	51.4373	51.0688	56.6089	61.498
XLOC_034951	XLOC_034951	Uprt	X:104482817-104507490	ECtrl	E3KO	OK	6.92562	10.4338	0.59125	1.83494	0.0018	0.0154292	yes	Uprt	3.72045	8.28267	7.80806	5.45782	11.1136	11.1174
XLOC_027212	XLOC_027212	Vamp5	6:72368048-72380468	ECtrl	E3KO	OK	5.84653	10.7271	0.875604	2.40719	5e-05	0.000724232	yes	Vamp5	5.70154	4.38068	6.46602	11.4554	6.68711	9.4089
XLOC_001771	XLOC_001771	Vangl2	1:172000959-172028444	ECtrl	E3KO	OK	3.19475	1.77767	-0.845717	-2.08719	0.00025	0.00297984	yes	Vangl2	3.72499	2.61852	2.53117	0.738093	2.08427	1.8118
XLOC_011896	XLOC_011896	Wdr5b	16:36041189-36042973	ECtrl	E3KO	OK	3.30799	1.66586	-0.989682	-1.79201	0.0042	0.0303542	yes	Wdr5b	3.32525	3.16447	2.93406	0.138423	2.37208	1.95014
XLOC_010727	XLOC_010727	Wisp1	15:66891319-66923201	ECtrl	E3KO	OK	2.82154	5.57769	0.983185	2.97325	5e-05	0.000724232	yes	Wisp1	1.35814	4.00162	2.37919	4.8387	4.81581	4.43972
XLOC_009101	XLOC_009101	Wnt5a	14:28504749-28527447	ECtrl	E3KO	OK	6.13678	10.6974	0.801709	2.44878	5e-05	0.000724232	yes	Wnt5a	5.15871	6.55929	6.00533	8.80578	8.64177	10.7371
XLOC_003879	XLOC_003879	Wnt9a	11:59306927-59333552	ECtrl	E3KO	OK	3.44517	1.92512	-0.839632	-1.93997	0.00115	0.0106752	yes	Wnt9a	2.66328	2.96763	3.76673	1.01283	2.07778	1.82635
XLOC_014185	XLOC_014185	Xdh	17:73883907-73950182	ECtrl	E3KO	OK	4.45479	6.92176	0.635782	2.095	0.00045	0.00489747	yes	Xdh	4.08423	3.52194	4.59308	5.49376	5.33434	6.64087
XLOC_003312	XLOC_003312	Xrcc6bp1	10:126868429-126901371	ECtrl	E3KO	OK	2.55925	6.72197	1.39316	2.27758	0.00015	0.00192134	yes	Xrcc6bp1	2.18771	2.44069	2.4102	13.0914	1.71064	1.15974
XLOC_008111	XLOC_008111	Zbed3	13:95325236-95337841	ECtrl	E3KO	OK	33.6305	23.1335	-0.539788	-1.91568	0.0009	0.00873141	yes	Zbed3	40.82	24.2435	27.9541	14.0676	23.0889	22.1378
XLOC_019481	XLOC_019481	Zbtb10	3:9250601-9285333	ECtrl	E3KO	OK	3.572	2.06442	-0.790997	-2.45464	5e-05	0.000724232	yes	Zbtb10	3.86722	3.10108	3.63173	1.29202	2.39981	1.84057
XLOC_016750	XLOC_016750	Zc3h15	2:83644434-83664622	ECtrl	E3KO	OK	37.8589	56.6839	0.582307	1.93778	0.001	0.00952306	yes	Zc3h15	46.8595	41.5903	26.2917	75.1413	41.9758	43.1123
XLOC_012279	XLOC_012279	Zdhhc8	16:18220753-18235136	ECtrl	E3KO	OK	3.51624	2.2397	-0.650727	-1.69238	0.00445	0.0317709	yes	Zdhhc8	3.35517	2.82602	3.22891	1.42046	2.18337	2.04369
XLOC_029456	XLOC_029456	Zfp109	7:24228047-24236632	ECtrl	E3KO	OK	1.5016	3.23549	1.10748	1.99926	0.00125	0.0114398	yes	Zfp109	1.13457	1.55747	1.39491	6.63651	0.782449	0.438162
XLOC_028126	XLOC_028126	Zfp30	7:29783997-29794702	ECtrl	E3KO	OK	2.56237	1.11266	-1.20347	-2.41607	0.0002	0.00245954	yes	Zfp30	2.47191	2.14576	2.52254	0.0713529	1.58706	1.29226
XLOC_029521	XLOC_029521	Zfp36	7:28376783-28379255	ECtrl	E3KO	OK	2.07318	4.87975	1.23496	2.36882	0.00015	0.00192134	yes	Zfp36	1.89349	2.03296	1.75073	4.34476	4.12083	3.99825
XLOC_023472	XLOC_023472	Zfp362	4:128773087-128806045	ECtrl	E3KO	OK	6.77489	4.45106	-0.60605	-1.59765	0.00545	0.0372103	yes	Zfp362	7.09764	4.8632	6.03073	2.54334	3.72051	4.96612
XLOC_008671	XLOC_008671	Zfp367	13:64133021-64153202	ECtrl	E3KO	OK	5.71581	2.45349	-1.22012	-2.18989	0.0001	0.00134402	yes	Zfp367	7.71591	3.5335	4.65026	1.5764	1.86172	2.77783
XLOC_013030	XLOC_013030	Zfp472	17:32965813-32979233	ECtrl	E3KO	OK	3.7767	1.59434	-1.24417	-2.68575	5e-05	0.000724232	yes	Zfp472	3.96758	3.19367	3.55494	0.194644	1.83283	2.21353
XLOC_012841	XLOC_012841	Zfp52	17:21555045-21562066	ECtrl	E3KO	OK	12.8764	18.6762	0.536472	1.83892	0.00145	0.0129287	yes	Zfp52	9.79837	19.3495	8.5116	8.8093	15.4476	25.3393
XLOC_012966	XLOC_012966	Zfp523	17:28177206-28205886	ECtrl	E3KO	OK	2.52575	1.32737	-0.92814	-1.3715	0.00525	0.0361338	yes	Zfp523	2.90309	1.61627	2.24633	0.700145	1.2579	1.37619
XLOC_027827	XLOC_027827	Zfp606	7:12478292-12496235	ECtrl	E3KO	OK	3.14985	1.94921	-0.692395	-1.73903	0.0023	0.0187672	yes	Zfp606	3.83337	3.81776	1.88637	1.3235	2.21004	1.73096
XLOC_013784	XLOC_013784	Zfp763	17:33016862-33033402	ECtrl	E3KO	OK	2.61774	0.986065	-1.40857	-2.8061	5e-05	0.000724232	yes	Zfp763	2.99481	2.33267	2.43156	0.390973	1.48509	0.77163
XLOC_018770	XLOC_018770	Zfp770	2:114193460-114201469	ECtrl	E3KO	OK	4.22793	2.84344	-0.572315	-1.62606	0.00535	0.0366684	yes	Zfp770	4.67232	4.65351	3.24651	0.569807	3.65115	3.51047
XLOC_012842	XLOC_012842	Zfp948	17:21567045-21588697	ECtrl	E3KO	OK	2.93799	4.56251	0.634999	1.6999	0.00315	0.0241791	yes	Zfp948	2.66612	3.32389	2.42212	5.63489	2.80744	3.29679
test_id	gene_id	gene	locus	sample_1	sample_2	status	value_1	value_2	log2(fold_change)	test_stat	p_value	q_value	significant	gene	E3KO Rep 1	E3KO Rep 2	E3KO Rep 3	EfCtrl Rep 1	EfCtrl Rep 2	EfCtrl Rep 3
XLOC_017821	XLOC_017821	9230102O04Rik,Gata3	2:9857077-9890034	E3KO	EfCtrl	OK	2.49085	0.369488	-2.75304	-2.11357	5e-05	0.000724232	yes	9230102O04Rik,Gata3	1.03107	0.579285	0.71326	0.0532655	0.158615	0.210369
XLOC_010510	XLOC_010510	Abcc4	14:118482691-118706219	E3KO	EfCtrl	OK	6.33916	4.23589	-0.581628	-1.95802	0.00075	0.007507	yes	Abcc4	6.17582	4.58081	5.38562	3.71096	4.67535	3.51793
XLOC_027680	XLOC_027680	Abcc9	6:142587861-142702274	E3KO	EfCtrl	OK	4.50679	2.97028	-0.601501	-1.99376	0.00025	0.00297984	yes	Abcc9	2.63985	4.67229	4.39317	2.16187	3.07361	3.20054
XLOC_026171	XLOC_026171	Abcg2	6:58584522-58692869	E3KO	EfCtrl	OK	76.9702	31.6936	-1.28011	-2.63352	5e-05	0.000724232	yes	Abcg2	91.0888	53.8449	50.5262	33.8059	26.6579	29.269
XLOC_021079	XLOC_021079	Acadm	3:153922356-153944632	E3KO	EfCtrl	OK	21.7488	33.4305	0.62023	2.22037	0.0001	0.00134402	yes	Acadm	13.74	22.2932	19.5807	34.5391	26.4294	32.4807
XLOC_021664	XLOC_021664	Acer2	4:86874395-86934822	E3KO	EfCtrl	OK	6.00684	2.22294	-1.43414	-2.78247	5e-05	0.000724232	yes	Acer2	3.04912	1.7897	3.00758	1.26383	0.844946	1.07306
XLOC_033790	XLOC_033790	Acpp	9:104288250-104337728	E3KO	EfCtrl	OK	8.24896	5.04884	-0.708261	-2.33135	5e-05	0.000724232	yes	Acpp	8.05442	6.77625	6.43429	4.02338	6.02693	4.45476
XLOC_031078	XLOC_031078	Acsl1	8:46471040-46536051	E3KO	EfCtrl	OK	7.13282	12.1599	0.769582	1.76121	0.00135	0.0121853	yes	Acsl1	4.092	6.71973	7.59002	12.6163	10.3605	11.1096
XLOC_015803	XLOC_015803	Acta2	19:34241089-34255336	E3KO	EfCtrl	OK	6.49473	27.2354	2.06814	6.24065	5e-05	0.000724232	yes	Acta2	4.48957	6.31515	5.74484	11.622	28.0727	35.138
XLOC_019242	XLOC_019242	Ada	2:163726583-163750239	E3KO	EfCtrl	OK	24.1369	16.5553	-0.543949	-1.76462	0.0022	0.0181411	yes	Ada	13.2441	19.6722	20.8047	16.4289	12.4586	13.1586
XLOC_012604	XLOC_012604	Adamts1	16:85793826-85803113	E3KO	EfCtrl	OK	16.5012	10.4199	-0.663232	-2.41955	5e-05	0.000724232	yes	Adamts1	13.0827	11.0898	15.1996	9.18982	10.3644	7.71584
XLOC_033308	XLOC_033308	Adamts15	9:30899154-30922452	E3KO	EfCtrl	OK	0.956592	4.07241	2.08991	5.12512	5e-05	0.000724232	yes	Adamts15	0.497548	1.03315	0.920337	3.00309	3.38126	4.84258
XLOC_012605	XLOC_012605	Adamts5	16:85858169-85901125	E3KO	EfCtrl	OK	25.2821	10.0213	-1.33504	-5.50104	5e-05	0.000724232	yes	Adamts5	16.4394	23.3472	27.3104	8.60933	11.5133	8.94962
XLOC_027345	XLOC_027345	Adamts9	6:92772698-93272889	E3KO	EfCtrl	OK	4.30697	2.50191	-0.78364	-2.26138	5e-05	0.000724232	yes	Adamts9	3.44052	3.49225	4.10897	1.86679	2.61867	2.523
XLOC_003015	XLOC_003015	Adarb1	10:77290725-77418270	E3KO	EfCtrl	OK	12.1006	21.689	0.841889	2.12432	5e-05	0.000724232	yes	Adarb1	6.11322	14.1224	11.2371	19.6838	19.7158	21.5762
XLOC_012170	XLOC_012170	Adcy9	16:4287528-4420498	E3KO	EfCtrl	OK	6.98547	4.76879	-0.550736	-1.76044	0.0024	0.0194009	yes	Adcy9	7.25998	5.21744	4.91952	5.15851	3.88485	4.15077
XLOC_031734	XLOC_031734	Adrb3	8:27225775-27229588	E3KO	EfCtrl	OK	5.13197	1.4604	-1.81315	-3.54595	5e-05	0.000724232	yes	Adrb3	9.33947	3.21028	2.37891	2.04111	1.05529	1.32893
XLOC_020930	XLOC_020930	Agl	3:116739998-116808166	E3KO	EfCtrl	OK	10.2401	6.72246	-0.60717	-2.03629	0.00015	0.00192134	yes	Agl	9.36181	8.86239	8.21174	5.82283	6.68985	6.94024
XLOC_023765	XLOC_023765	Agtrap	4:148077060-148088031	E3KO	EfCtrl	OK	19.0699	27.6322	0.535051	2.16655	5e-05	0.000724232	yes	Agtrap	13.7749	19.1195	15.4461	26.2841	23.586	26.7221
XLOC_020866	XLOC_020866	Ahcyl1	3:107663117-107696560	E3KO	EfCtrl	OK	78.1927	52.2235	-0.582336	-2.44681	5e-05	0.000724232	yes	Ahcyl1	71.6509	64.332	73.1446	48.9586	53.5347	54.0546
XLOC_013857	XLOC_013857	Aif1	17:35170990-35176068	E3KO	EfCtrl	OK	4.18111	0.880727	-2.24712	-2.28469	0.00025	0.00297984	yes	Aif1	8.33801	0.649266	1.13287	0.427941	1.78053	0.393396
XLOC_000852	XLOC_000852	Aim2	1:173334253-173466040	E3KO	EfCtrl	OK	15.2993	3.40922	-2.16595	-3.53921	5e-05	0.000724232	yes	Aim2	10.7646	12.5866	17.8266	2.78698	4.78855	2.31154
XLOC_021774	XLOC_021774	Ak4	4:101419276-101466995	E3KO	EfCtrl	OK	2.96171	1.20376	-1.29888	-2.40484	5e-05	0.000724232	yes	Ak4	4.45293	1.25329	1.70184	0.852427	1.27921	1.26291
XLOC_025927	XLOC_025927	Akr1b10	6:34384217-34396950	E3KO	EfCtrl	OK	19.9729	12.345	-0.694117	-2.15537	0.00025	0.00297984	yes	Akr1b10	16.2605	15.703	19.3632	10.7199	12.887	11.6704
XLOC_008420	XLOC_008420	Aldh5a1	13:24905592-24941417	E3KO	EfCtrl	OK	1.25294	2.15109	0.779748	1.90179	0.0014	0.0125573	yes	Aldh5a1	0.832902	1.45039	0.991786	2.36494	1.93086	1.86179
XLOC_036492	XLOC_036492	Ammecr1	X:142851145-142966728	E3KO	EfCtrl	OK	9.89841	6.77404	-0.54718	-2.00169	0.00065	0.00667132	yes	Ammecr1	8.01696	9.50353	9.05013	5.73079	7.2699	7.02683
XLOC_028789	XLOC_028789	Ampd3	7:110766676-110844457	E3KO	EfCtrl	OK	26.8591	61.7284	1.20052	1.46282	0.0015	0.0132916	yes	Ampd3	20.3179	27.5206	18.1314	57.2156	48.655	50.1854
XLOC_020969	XLOC_020969	Ank2	3:126921606-126998452	E3KO	EfCtrl	OK	4.91445	9.63694	0.971543	3.48218	5e-05	0.000724232	yes	Ank2	2.29238	5.26323	5.23827	10.282	7.08201	9.85202
XLOC_033197	XLOC_033197	Ankrd49	9:14780208-14782964	E3KO	EfCtrl	OK	11.7586	7.56842	-0.635652	-1.88697	0.00105	0.00990498	yes	Ankrd49	13.916	7.35807	8.92051	8.25027	6.43593	6.92838
XLOC_033284	XLOC_033284	Anln	9:22331213-22389206	E3KO	EfCtrl	OK	7.38707	13.0962	0.82607	3.14467	5e-05	0.000724232	yes	Anln	6.67283	5.95291	6.48611	13.5795	10.6549	13.1254
XLOC_018722	XLOC_018722	Ano3	2:110655200-110950923	E3KO	EfCtrl	OK	17.722	8.24475	-1.104	-3.72048	5e-05	0.000724232	yes	Ano3	12.5995	16.9928	17.2962	8.0463	8.95372	7.04922
XLOC_030105	XLOC_030105	Anpep	7:79821802-79848210	E3KO	EfCtrl	OK	8.84867	5.26298	-0.74958	-2.30824	0.0001	0.00134402	yes	Anpep	7.83075	5.67758	8.82135	4.94544	6.50231	3.28427
XLOC_027289	XLOC_027289	Antxr1	6:87133853-87335775	E3KO	EfCtrl	OK	25.7261	37.8822	0.558286	2.38244	5e-05	0.000724232	yes	Antxr1	19.996	25.2749	20.686	34.6242	34.1044	37.5701
XLOC_024353	XLOC_024353	Anxa3	5:96793384-96845968	E3KO	EfCtrl	OK	77.025	44.885	-0.779094	-3.18041	5e-05	0.000724232	yes	Anxa3	61.0057	62.1656	70.5663	34.366	49.6927	39.7447
XLOC_005227	XLOC_005227	Anxa6	11:54979107-55033445	E3KO	EfCtrl	OK	66.2795	95.0448	0.520046	2.2413	0.0001	0.00134402	yes	Anxa6	50.7634	62.3518	52.4883	95.8585	81.022	82.6079
XLOC_028418	XLOC_028418	Apba2	7:64501705-64753870	E3KO	EfCtrl	OK	3.29653	6.21448	0.914685	2.49683	5e-05	0.000724232	yes	Apba2	3.25573	3.42606	3.18168	7.92519	4.59685	5.63686
XLOC_030396	XLOC_030396	Apbb1	7:105558485-105574402	E3KO	EfCtrl	OK	0.987823	2.15075	1.12251	1.96652	0.00165	0.0143734	yes	Apbb1	0.687699	1.08679	0.706149	2.38996	1.73193	1.78607
XLOC_035775	XLOC_035775	Apln	X:48025145-48034853	E3KO	EfCtrl	OK	231.649	114.155	-1.02095	-4.46978	5e-05	0.000724232	yes	Apln	186.785	192.944	214.795	100.138	119.067	102.298
XLOC_012376	XLOC_012376	Apod	16:31296191-31314808	E3KO	EfCtrl	OK	5.28701	0.870387	-2.60272	-2.84272	0.00025	0.00297984	yes	Apod	11.4552	0.532994	0.602106	0.626767	1.03426	0.767943
XLOC_029370	XLOC_029370	Apoe	7:19696108-19699166	E3KO	EfCtrl	OK	5.39264	2.17412	-1.31056	-1.84682	0.00045	0.00489747	yes	Apoe	3.07018	4.38245	5.90456	2.02874	2.10158	1.64542
XLOC_034845	XLOC_034845	Apoo	X:94367116-94417093	E3KO	EfCtrl	OK	8.7201	3.95434	-1.14091	-2.09312	0.0005	0.00535591	yes	Apoo	12.6708	4.17152	5.7765	4.10385	3.93111	3.47436
XLOC_026136	XLOC_026136	Aqp1	6:55336431-55348555	E3KO	EfCtrl	OK	885.593	597.138	-0.568579	-2.35181	5e-05	0.000724232	yes	Aqp1	729.522	775.91	726.963	573.906	482.186	593.886
XLOC_033183	XLOC_033183	Arhgap42	9:8994952-9239013	E3KO	EfCtrl	OK	4.3997	9.83132	1.15998	4.09295	5e-05	0.000724232	yes	Arhgap42	2.80939	4.70067	4.14533	8.70474	9.55592	10.1622
XLOC_030868	XLOC_030868	Arhgef10	8:14911662-15001085	E3KO	EfCtrl	OK	5.00514	7.86171	0.651432	1.80035	0.0018	0.0154292	yes	Arhgef10	3.89372	4.69753	4.11437	6.33442	7.15583	8.45882
XLOC_019677	XLOC_019677	Arhgef26	3:62338343-62462221	E3KO	EfCtrl	OK	1.04232	2.71422	1.38074	2.21655	0.0002	0.00245954	yes	Arhgef26	0.50668	1.08025	0.953264	1.91472	2.98318	2.33736
XLOC_009097	XLOC_009097	Arhgef3	14:27238038-27403904	E3KO	EfCtrl	OK	11.0275	16.2349	0.55799	2.08401	0.00035	0.00396199	yes	Arhgef3	6.50798	11.5764	10.486	15.673	12.9372	17.1512
XLOC_022775	XLOC_022775	Arhgef39	4:43496141-43499695	E3KO	EfCtrl	OK	1.13724	3.39764	1.57899	1.89013	0.001	0.00952306	yes	Arhgef39	0.615604	0.838571	1.48513	3.85777	2.82446	2.92357
XLOC_035123	XLOC_035123	Armcx4	X:134686518-134696757	E3KO	EfCtrl	OK	9.7403	6.27174	-0.635099	-2.5266	5e-05	0.000724232	yes	Armcx4	6.09566	8.86888	9.56516	5.29039	5.7525	6.15583
XLOC_028799	XLOC_028799	Arntl	7:113207464-113314122	E3KO	EfCtrl	OK	12.7838	8.61398	-0.569567	-1.93881	0.0009	0.00873141	yes	Arntl	14.1499	8.71689	9.62018	8.9042	7.45868	7.96019
XLOC_008065	XLOC_008065	Arrdc3	13:80883383-80896035	E3KO	EfCtrl	OK	50.8937	75.1648	0.56257	1.86331	0.0007	0.00709513	yes	Arrdc3	35.465	53.7686	42.0841	78.1695	57.1876	77.006
XLOC_024315	XLOC_024315	Art3	5:92331826-92414628	E3KO	EfCtrl	OK	6.30469	1.17135	-2.42825	-2.32242	5e-05	0.000724232	yes	Art3	10.9605	2.85778	2.29996	1.09618	1.03094	1.88365
XLOC_007556	XLOC_007556	Asb13	13:3634031-3651774	E3KO	EfCtrl	OK	3.78397	6.55467	0.792622	1.88309	0.001	0.00952306	yes	Asb13	2.13008	2.792	3.99607	6.13721	5.20472	5.87223
XLOC_025802	XLOC_025802	Asb4	6:5383385-5433022	E3KO	EfCtrl	OK	3.45031	0.897289	-1.94308	-3.13982	5e-05	0.000724232	yes	Asb4	2.07426	2.37759	4.54042	0.577541	1.20414	0.76672
XLOC_031274	XLOC_031274	Asf1b	8:83955506-83970197	E3KO	EfCtrl	OK	2.37707	5.48337	1.20587	2.12935	0.00085	0.0083291	yes	Asf1b	0.518047	2.37757	3.26721	5.72153	4.99113	4.63409
XLOC_000681	XLOC_000681	Aspm	1:139454772-139494090	E3KO	EfCtrl	OK	1.77074	4.09678	1.21014	4.01529	5e-05	0.000724232	yes	Aspm	1.22726	1.69209	1.68885	4.23509	3.38248	4.02665
XLOC_016362	XLOC_016362	Ass1	2:31470206-31520672	E3KO	EfCtrl	OK	35.662	12.777	-1.48084	-5.01467	5e-05	0.000724232	yes	Ass1	30.9305	26.3921	31.9633	12.7614	12.8461	9.66674
XLOC_024943	XLOC_024943	Atg9b	5:24364809-24392143	E3KO	EfCtrl	OK	4.37114	1.93149	-1.17829	-1.85085	0.00305	0.0235647	yes	Atg9b	3.65836	2.4414	3.93278	1.66273	2.32128	1.19713
XLOC_004506	XLOC_004506	Atp6v0a1	11:101009451-101063719	E3KO	EfCtrl	OK	74.2801	50.2244	-0.564587	-1.60514	0.0078	0.0492859	yes	Atp6v0a1	74.1283	59.2223	57.1431	43.0375	45.5853	50.231
XLOC_025157	XLOC_025157	Atp8a1	5:67607882-67909013	E3KO	EfCtrl	OK	6.92211	4.12965	-0.745192	-1.67604	0.00025	0.00297984	yes	Atp8a1	5.66143	5.89611	8.34664	4.46947	4.07402	4.27776
XLOC_022173	XLOC_022173	Aunip	4:134510998-134523927	E3KO	EfCtrl	OK	1.19869	2.59166	1.11242	1.69944	0.00415	0.0300799	yes	Aunip	1.3345	1.15181	0.524004	3.0159	1.81275	2.36602
XLOC_019351	XLOC_019351	Aurka	2:172356189-172370535	E3KO	EfCtrl	OK	9.27543	13.9613	0.589948	1.77638	0.0018	0.0154292	yes	Aurka	7.09738	7.1637	7.74265	14.9803	10.7573	13.2459
XLOC_029488	XLOC_029488	Axl	7:25757272-25788705	E3KO	EfCtrl	OK	11.0848	7.34478	-0.593792	-1.55716	0.00375	0.027755	yes	Axl	5.32	9.76904	13.3571	4.08794	9.43283	6.65117
XLOC_031927	XLOC_031927	B3gnt3	8:71691718-71701800	E3KO	EfCtrl	OK	11.0695	5.63378	-0.974409	-2.61554	5e-05	0.000724232	yes	B3gnt3	8.93283	9.41147	9.73146	3.97822	6.6393	4.98059
XLOC_012152	XLOC_012152	Bace2	16:97356727-97439012	E3KO	EfCtrl	OK	6.68804	2.842	-1.23468	-3.57601	5e-05	0.000724232	yes	Bace2	6.57604	5.04703	5.46433	2.77383	3.50194	1.75814
XLOC_014270	XLOC_014270	Bambi	18:3507956-3516404	E3KO	EfCtrl	OK	2.93774	1.62341	-0.855683	-2.26497	5e-05	0.000724232	yes	Bambi	3.12931	2.38402	2.18296	1.45234	1.58529	1.68748
XLOC_029373	XLOC_029373	Bcam	7:19756130-19775403	E3KO	EfCtrl	OK	4.06795	2.32068	-0.809756	-1.58622	0.0034	0.0257068	yes	Bcam	2.75425	3.51727	3.97537	2.64661	2.034	1.716
XLOC_020115	XLOC_020115	Bcar3	3:122419779-122530180	E3KO	EfCtrl	OK	3.50305	1.93108	-0.859206	-2.04706	0.00035	0.00396199	yes	Bcar3	3.37942	2.606	2.7112	1.90812	1.58287	1.82054
XLOC_031395	XLOC_031395	Bean1	8:104170512-104219092	E3KO	EfCtrl	OK	3.21844	8.03701	1.3203	3.60228	5e-05	0.000724232	yes	Bean1	1.94158	3.37874	2.88826	6.78018	7.04171	8.40882
XLOC_034680	XLOC_034680	Bgn	X:73483601-73495933	E3KO	EfCtrl	OK	114.13	28.94	-1.97954	-7.90921	5e-05	0.000724232	yes	Bgn	85.8171	80.3812	126.579	15.2801	30.5509	34.552
XLOC_004745	XLOC_004745	Birc5	11:117849250-117855743	E3KO	EfCtrl	OK	22.6515	33.0045	0.543056	1.70674	0.0036	0.0268779	yes	Birc5	25.9972	14.6281	16.0827	36.1856	27.1879	29.1144
XLOC_030119	XLOC_030119	Blm	7:80454992-80535119	E3KO	EfCtrl	OK	1.0439	1.90568	0.868319	2.03079	0.0007	0.00709513	yes	Blm	0.695085	1.06693	0.956988	2.08548	1.5525	1.77572
XLOC_029361	XLOC_029361	Bloc1s3	7:19505813-19508331	E3KO	EfCtrl	OK	24.6072	16.1256	-0.609729	-1.95627	0.00085	0.0083291	yes	Bloc1s3	28.4002	17.1561	16.3154	15.2921	13.084	16.9881
XLOC_010123	XLOC_010123	Bmp4	14:46379413-46390669	E3KO	EfCtrl	OK	64.2916	42.8209	-0.586313	-2.18693	5e-05	0.000724232	yes	Bmp4	63.7303	43.6945	53.632	45.4588	36.0813	37.33
XLOC_007827	XLOC_007827	Bmp6	13:38345715-38499728	E3KO	EfCtrl	OK	12.0668	17.4063	0.528562	1.72722	0.00285	0.0223185	yes	Bmp6	11.6876	8.61052	9.75976	18.5172	12.5941	16.9312
XLOC_009695	XLOC_009695	Bora	14:99046426-99074537	E3KO	EfCtrl	OK	1.52582	3.22207	1.0784	2.29476	0.0004	0.00443257	yes	Bora	0.831722	1.1507	2.00282	2.65259	3.70875	2.78982
XLOC_024119	XLOC_024119	Bst1	5:43744615-43843247	E3KO	EfCtrl	OK	7.51323	2.02359	-1.89252	-1.82997	0.00155	0.0136555	yes	Bst1	6.71239	5.34933	7.58142	1.88372	2.18702	1.77801
XLOC_018899	XLOC_018899	Bub1	2:127801121-127831865	E3KO	EfCtrl	OK	4.4799	7.93687	0.825103	2.47622	5e-05	0.000724232	yes	Bub1	4.55547	3.36783	3.92203	8.43698	7.18557	7.20026
XLOC_017843	XLOC_017843	C1ql3	2:13003456-13011747	E3KO	EfCtrl	OK	3.27045	1.48982	-1.13435	-2.18794	0.00035	0.00396199	yes	C1ql3	2.53449	2.43382	3.39979	0.782541	1.9994	1.37267
XLOC_014122	XLOC_014122	C3	17:57203969-57228136	E3KO	EfCtrl	OK	11.2211	1.68909	-2.73189	-2.12846	5e-05	0.000724232	yes	C3	15.6365	4.24083	4.10138	1.22255	1.13706	1.75139
XLOC_031287	XLOC_031287	Cacna1a	8:84388439-84640246	E3KO	EfCtrl	OK	4.81137	1.17405	-2.03496	-1.95296	0.00015	0.00192134	yes	Cacna1a	6.90881	0.540175	0.912549	0.702406	0.440484	0.265485
XLOC_026849	XLOC_026849	Cadps2	6:23262772-23839421	E3KO	EfCtrl	OK	1.74738	3.21227	0.878399	1.80017	0.0013	0.0118058	yes	Cadps2	1.6034	1.59487	1.28604	3.67838	1.64349	3.72434
XLOC_022229	XLOC_022229	Camk2n1	4:138454313-138460123	E3KO	EfCtrl	OK	18.6062	12.6673	-0.554676	-2.1121	0.0003	0.00348276	yes	Camk2n1	15.9556	14.9523	16.6326	10.0651	13.759	11.7591
XLOC_036673	XLOC_036673	Car5b	X:163976821-164027997	E3KO	EfCtrl	OK	6.90059	3.42861	-1.0091	-2.95867	5e-05	0.000724232	yes	Car5b	7.25829	5.47651	5.20579	3.50269	3.48136	2.89088
XLOC_022549	XLOC_022549	Car8	4:8143366-8239041	E3KO	EfCtrl	OK	21.2089	13.4885	-0.652941	-2.55933	5e-05	0.000724232	yes	Car8	14.5175	17.793	24.0701	11.6414	15.6844	11.8875
XLOC_032278	XLOC_032278	Casp1	9:5298516-5307265	E3KO	EfCtrl	OK	4.18639	1.67321	-1.32309	-2.55778	5e-05	0.000724232	yes	Casp1	4.5283	2.82239	3.39395	1.21696	1.76953	1.77906
XLOC_032280	XLOC_032280	Casp12	9:5345429-5373032	E3KO	EfCtrl	OK	3.81427	9.03198	1.24363	2.02301	0.00025	0.00297984	yes	Casp12	1.08547	4.60945	4.34559	8.50333	7.64998	9.42624
XLOC_032279	XLOC_032279	Casp4	9:5308827-5336783	E3KO	EfCtrl	OK	25.0189	12.6562	-0.983175	-1.65261	0.00685	0.0444672	yes	Casp4	29.3308	15.647	17.6823	10.1978	13.8099	11.4002
XLOC_025832	XLOC_025832	Cav1	6:17197750-17385604	E3KO	EfCtrl	OK	473.012	675.328	0.513713	1.70124	0.0019	0.0161162	yes	Cav1	414.677	409.561	421.383	659.861	612.94	668.913
XLOC_012130	XLOC_012130	Cbr3	16:93683214-93690990	E3KO	EfCtrl	OK	3.07175	0.890041	-1.78712	-2.32806	0.00055	0.00580945	yes	Cbr3	4.9404	0.968265	1.37164	1.01046	0.886241	0.52793
XLOC_004755	XLOC_004755	Cbx2	11:119022961-119031270	E3KO	EfCtrl	OK	2.15436	3.42139	0.667327	1.64545	0.00445	0.0317709	yes	Cbx2	1.4409	2.18628	1.8895	3.27603	2.62706	3.59166
XLOC_033137	XLOC_033137	Ccbp2	9:121898463-121911064	E3KO	EfCtrl	OK	28.101	18.1533	-0.630391	-2.38347	0.0001	0.00134402	yes	Ccbp2	22.6545	25.378	23.3751	17.6696	18.1214	14.9798
XLOC_014876	XLOC_014876	Ccdc112	18:46282150-46311928	E3KO	EfCtrl	OK	0.993775	2.31202	1.21817	2.36209	0.00015	0.00192134	yes	Ccdc112	0.0616033	1.48579	1.1073	1.53739	2.68975	2.35728
XLOC_026101	XLOC_026101	Ccdc126	6:49319273-49341582	E3KO	EfCtrl	OK	8.09139	4.96292	-0.705198	-1.94657	0.00115	0.0106752	yes	Ccdc126	11.2125	5.21636	4.76673	4.09512	5.61324	4.91206
XLOC_011304	XLOC_011304	Ccdc166	15:75979871-75982285	E3KO	EfCtrl	OK	2.64385	1.15352	-1.19659	-1.98581	0.0011	0.0102983	yes	Ccdc166	4.9579	0.9758	0.493919	1.1541	0.958559	1.13582
XLOC_026354	XLOC_026354	Ccdc48	6:87730868-87755912	E3KO	EfCtrl	OK	4.71795	8.46332	0.843064	1.9086	0.0009	0.00873141	yes	Ccdc48	1.00123	4.00311	2.9327	7.56573	4.81081	4.21716
XLOC_032304	XLOC_032304	Ccdc82	9:13246981-13289409	E3KO	EfCtrl	OK	4.35564	7.06533	0.697873	1.73221	0.00355	0.0265861	yes	Ccdc82	1.13938	5.62931	5.07928	6.16221	6.76409	7.36993
XLOC_005068	XLOC_005068	Ccdc99	11:34809189-34833641	E3KO	EfCtrl	OK	2.27889	3.95408	0.795007	1.85393	0.0013	0.0118058	yes	Ccdc99	1.7889	1.55572	2.29511	3.68988	3.82114	3.48906
XLOC_004231	XLOC_004231	Ccl2	11:82028223-82038562	E3KO	EfCtrl	OK	591.317	228.595	-1.37114	-5.82396	5e-05	0.000724232	yes	Ccl2	536.611	481.584	513.914	187.849	287.233	177.803
XLOC_022760	XLOC_022760	Ccl21a	4:42735544-42856771	E3KO	EfCtrl	OK	0.925249	4.6154	2.31854	2.9052	0.0001	0.00134402	yes	Ccl21a	1.0214	0.705457	0.590778	5.31044	3.37416	4.23937
XLOC_004232	XLOC_004232	Ccl7	11:82045711-82047525	E3KO	EfCtrl	OK	41.1501	10.9201	-1.91391	-5.12476	5e-05	0.000724232	yes	Ccl7	28.2775	35.5641	43.5322	11.0585	14.5298	5.55262
XLOC_020373	XLOC_020373	Ccna2	3:36552605-36572150	E3KO	EfCtrl	OK	12.0317	23.5689	0.970049	2.27226	5e-05	0.000724232	yes	Ccna2	14.1401	8.08557	8.98171	25.8047	17.8531	24.0654
XLOC_008848	XLOC_008848	Ccnb1	13:100778649-100786570	E3KO	EfCtrl	OK	3.43857	7.35052	1.09604	2.72791	5e-05	0.000724232	yes	Ccnb1	1.92421	3.31274	3.73289	7.42805	6.04354	7.85605
XLOC_033625	XLOC_033625	Ccnb2	9:70407688-70421554	E3KO	EfCtrl	OK	13.4378	30.5587	1.18529	3.99147	5e-05	0.000724232	yes	Ccnb2	12.7137	9.39383	11.6308	32.2677	24.4424	28.17
XLOC_013647	XLOC_013647	Ccnf	17:24223231-24251409	E3KO	EfCtrl	OK	2.84496	6.05865	1.09059	2.32022	5e-05	0.000724232	yes	Ccnf	1.56122	2.76424	2.8675	7.47009	4.63802	4.69889
XLOC_005087	XLOC_005087	Ccng1	11:40748551-40755311	E3KO	EfCtrl	OK	204.191	123.516	-0.725221	-3.0417	5e-05	0.000724232	yes	Ccng1	148.929	186.667	211.531	107.887	136.465	119.345
XLOC_024651	XLOC_024651	Cct6a	5:129787438-129845820	E3KO	EfCtrl	OK	1320.97	508.336	-1.37774	-23.3296	5e-05	0.000724232	yes	Cct6a	151.179	139.551	130.874	125.659	129.052	121.776
XLOC_000252	XLOC_000252	Cd28	1:60716799-60773359	E3KO	EfCtrl	OK	2.15713	0.926285	-1.21958	-2.53193	5e-05	0.000724232	yes	Cd28	0.808282	3.02554	2.02004	0.48966	1.28727	0.949259
XLOC_004543	XLOC_004543	Cd300lg	11:102041508-102055620	E3KO	EfCtrl	OK	1.98805	3.60821	0.859926	1.76359	0.0024	0.0194009	yes	Cd300lg	2.34482	1.4781	1.152	3.80839	2.22363	4.025
XLOC_000968	XLOC_000968	Cd34	1:194938820-195037908	E3KO	EfCtrl	OK	475.133	281.17	-0.75689	-3.23046	5e-05	0.000724232	yes	Cd34	406.93	416.186	401.501	255.483	296.134	247.157
XLOC_024904	XLOC_024904	Cd36	5:17781689-17888959	E3KO	EfCtrl	OK	26.7593	18.1748	-0.558103	-2.21973	5e-05	0.000724232	yes	Cd36	23.2474	20.0292	27.5151	14.7708	21.0745	16.9875
XLOC_023564	XLOC_023564	Cd52	4:134065911-134095082	E3KO	EfCtrl	OK	14.3844	6.19796	-1.21464	-1.98673	0.0008	0.00791745	yes	Cd52	25.2278	4.06347	6.5436	5.64342	7.09798	4.86168
XLOC_020856	XLOC_020856	Cd53	3:106758860-106790149	E3KO	EfCtrl	OK	12.5821	6.09596	-1.04545	-3.3092	5e-05	0.000724232	yes	Cd53	11.572	9.42537	13.2212	4.4234	7.73874	6.11837
XLOC_001501	XLOC_001501	Cd55	1:130439026-130557075	E3KO	EfCtrl	OK	82.6498	52.3868	-0.657808	-2.24688	5e-05	0.000724232	yes	Cd55	73.1859	71.1221	73.639	46.4375	52.744	52.5193
XLOC_016974	XLOC_016974	Cd59a	2:104095800-104115354	E3KO	EfCtrl	OK	63.7943	44.708	-0.512895	-1.74724	0.00275	0.0216705	yes	Cd59a	67.3693	48.7583	47.6624	40.0317	46.4738	40.4621
XLOC_005425	XLOC_005425	Cd68	11:69664212-69666153	E3KO	EfCtrl	OK	41.4019	24.7935	-0.739733	-1.86723	0.0009	0.00873141	yes	Cd68	17.5524	40.2575	50.559	24.6159	26.848	18.3918
XLOC_014205	XLOC_014205	Cdc42ep3	17:79334024-79358022	E3KO	EfCtrl	OK	12.4572	6.81626	-0.869924	-2.5288	5e-05	0.000724232	yes	Cdc42ep3	14.4446	7.21553	10.0013	5.3681	7.40069	6.57793
XLOC_010362	XLOC_010362	Cdca2	14:67676330-67715841	E3KO	EfCtrl	OK	2.09565	5.53279	1.40061	1.82962	0.0006	0.0062413	yes	Cdca2	1.11993	2.03795	2.41304	5.82887	5.86881	4.44627
XLOC_026578	XLOC_026578	Cdca3	6:124829546-124833701	E3KO	EfCtrl	OK	5.60316	13.1181	1.22724	2.60291	5e-05	0.000724232	yes	Cdca3	3.16474	6.11203	5.21437	10.297	13.6828	10.7274
XLOC_015107	XLOC_015107	Cdca5	19:6084982-6091777	E3KO	EfCtrl	OK	3.2149	5.72415	0.832287	1.90369	0.00145	0.0129287	yes	Cdca5	1.88597	3.5648	2.76906	5.44869	4.33164	6.08744
XLOC_016658	XLOC_016658	Cdca7	2:72476158-72486893	E3KO	EfCtrl	OK	1.25398	3.41314	1.44459	1.74222	0.00195	0.0164532	yes	Cdca7	0.545099	1.50678	1.20689	2.05808	4.30949	3.46652
XLOC_031525	XLOC_031525	Cdh13	8:118283732-119324921	E3KO	EfCtrl	OK	81.2724	123.435	0.602919	2.61053	5e-05	0.000724232	yes	Cdh13	59.6025	83.4206	63.3167	124.925	106.95	110.366
XLOC_014740	XLOC_014740	Cdh2	18:16588876-16809246	E3KO	EfCtrl	OK	12.4628	7.6832	-0.697849	-2.48397	5e-05	0.000724232	yes	Cdh2	7.16323	11.8627	13.6287	5.72671	8.64963	7.55452
XLOC_002973	XLOC_002973	Cdk1	10:69336634-69352938	E3KO	EfCtrl	OK	35.0575	60.0989	0.777613	2.17352	0.00015	0.00192134	yes	Cdk1	33.4396	26.8042	28.8055	66.1387	51.7536	50.3957
XLOC_001520	XLOC_001520	Cdk18	1:132113549-132139685	E3KO	EfCtrl	OK	14.3858	8.66658	-0.731111	-2.4604	5e-05	0.000724232	yes	Cdk18	9.76242	12.4017	13.9276	9.06904	8.08828	6.77042
XLOC_012986	XLOC_012986	Cdkn1a	17:29090978-29100722	E3KO	EfCtrl	OK	369.465	202.581	-0.86694	-3.81932	5e-05	0.000724232	yes	Cdkn1a	252.131	331.618	375.313	191.653	212.603	170.653
XLOC_023087	XLOC_023087	Cdkn2b	4:89306288-89311032	E3KO	EfCtrl	OK	115.715	72.3326	-0.677858	-2.75953	5e-05	0.000724232	yes	Cdkn2b	106.328	91.3151	92.4843	52.6411	77.083	69.3534
XLOC_023249	XLOC_023249	Cdkn2c	4:109660875-109667189	E3KO	EfCtrl	OK	3.45617	7.85933	1.18523	2.28087	0.0003	0.00348276	yes	Cdkn2c	1.2851	3.89143	3.87483	6.97024	6.68107	8.58495
XLOC_009249	XLOC_009249	Cdkn3	14:46760540-46771525	E3KO	EfCtrl	OK	7.17083	12.4292	0.79352	1.69986	0.00475	0.0334549	yes	Cdkn3	8.07772	3.67244	6.39467	14.2325	11.2451	9.60891
XLOC_017809	XLOC_017809	Celf2	2:6539704-7081313	E3KO	EfCtrl	OK	4.75556	13.3275	1.48672	2.36194	5e-05	0.000724232	yes	Celf2	1.9112	5.09412	6.71129	12.4479	9.95045	15.9759
XLOC_011455	XLOC_011455	Celsr1	15:85898757-86033777	E3KO	EfCtrl	OK	2.86505	6.41436	1.16275	4.12221	5e-05	0.000724232	yes	Celsr1	1.93893	2.58204	2.64911	6.70674	4.61677	6.24242
XLOC_024024	XLOC_024024	Cenpa	5:30666776-30674827	E3KO	EfCtrl	OK	28.8661	42.3102	0.551627	1.80342	0.00205	0.0171154	yes	Cenpa	31.102	22.803	21.0469	46.6503	36.6568	38.6848
XLOC_020170	XLOC_020170	Cenpe	3:135212562-135273540	E3KO	EfCtrl	OK	3.9306	7.30418	0.893974	3.4558	5e-05	0.000724232	yes	Cenpe	3.14105	3.29465	3.5915	7.25573	6.3932	6.79336
XLOC_001883	XLOC_001883	Cenpf	1:189640598-189688086	E3KO	EfCtrl	OK	1.80381	7.05558	1.96771	1.72809	0.0001	0.00134402	yes	Cenpf	1.14529	2.11898	1.93177	7.39533	6.37952	6.33775
XLOC_035115	XLOC_035115	Cenpi	X:134308083-134362639	E3KO	EfCtrl	OK	2.34478	4.46991	0.930797	1.88297	0.00035	0.00396199	yes	Cenpi	1.64257	2.15515	2.41649	5.68433	2.88077	4.40207
XLOC_000752	XLOC_000752	Cenpl	1:161070766-161086724	E3KO	EfCtrl	OK	2.50071	4.89768	0.969761	1.77878	0.00375	0.027755	yes	Cenpl	1.3383	2.60656	2.63043	4.36491	5.19539	4.47751
XLOC_031513	XLOC_031513	Cenpn	8:116921739-116941503	E3KO	EfCtrl	OK	2.12283	5.26793	1.31124	2.70191	5e-05	0.000724232	yes	Cenpn	0.443862	2.90303	2.26582	5.50807	3.92174	5.45743
XLOC_015358	XLOC_015358	Cep55	19:38055024-38074425	E3KO	EfCtrl	OK	4.17463	9.75637	1.2247	3.61091	5e-05	0.000724232	yes	Cep55	3.69037	3.27435	3.70472	10.9842	7.04064	9.1968
XLOC_002852	XLOC_002852	Cep57l1	10:41718839-41809607	E3KO	EfCtrl	OK	2.03054	3.80977	0.907844	2.03058	0.00075	0.007507	yes	Cep57l1	1.5776	1.80734	1.83484	3.75332	3.79303	3.26372
XLOC_031406	XLOC_031406	Ces2b	8:104831571-104840093	E3KO	EfCtrl	OK	3.80575	1.70281	-1.16026	-2.42247	5e-05	0.000724232	yes	Ces2b	3.98001	2.3621	3.10138	1.64593	1.46072	1.59205
XLOC_031409	XLOC_031409	Ces2e	8:104926259-104934672	E3KO	EfCtrl	OK	18.9471	4.87479	-1.95857	-5.89157	5e-05	0.000724232	yes	Ces2e	14.632	15.3019	18.025	4.31812	5.00936	4.21145
XLOC_031411	XLOC_031411	Ces2g	8:104961717-104969537	E3KO	EfCtrl	OK	35.2091	13.1886	-1.41665	-5.36587	5e-05	0.000724232	yes	Ces2g	30.3086	28.5421	31.5707	11.4974	12.7323	13.0099
XLOC_025838	XLOC_025838	Cftr	6:18170686-18322768	E3KO	EfCtrl	OK	1.53188	3.57461	1.22248	3.50775	5e-05	0.000724232	yes	Cftr	1.42914	1.53212	1.06235	3.47802	3.0702	3.76524
XLOC_033633	XLOC_033633	Cgnl1	9:71626508-71771602	E3KO	EfCtrl	OK	114.779	72.6589	-0.659648	-2.62628	5e-05	0.000724232	yes	Cgnl1	60.2756	79.0666	78.093	46.4365	54.6468	47.421
XLOC_012133	XLOC_012133	Chaf1b	16:93883900-93906115	E3KO	EfCtrl	OK	2.87981	4.86519	0.756524	1.50765	0.0042	0.0303542	yes	Chaf1b	1.17112	3.00788	3.20856	4.4724	4.23205	4.74819
XLOC_017204	XLOC_017204	Chchd5	2:129129699-129134134	E3KO	EfCtrl	OK	2.32669	5.3324	1.1965	1.82265	0.00315	0.0241791	yes	Chchd5	0.259406	3.37877	3.0332	6.92163	4.15466	4.74271
XLOC_019487	XLOC_019487	Chmp4c	3:10366906-10391005	E3KO	EfCtrl	OK	2.86106	1.41045	-1.0204	-1.82517	0.00265	0.0210194	yes	Chmp4c	3.73535	1.64945	1.77	1.41837	1.24709	1.30606
XLOC_033737	XLOC_033737	Chst2	9:95400928-95407270	E3KO	EfCtrl	OK	13.5139	8.10375	-0.737782	-2.81116	5e-05	0.000724232	yes	Chst2	7.67196	14.555	13.2151	6.78148	7.74089	8.58893
XLOC_034309	XLOC_034309	Chst7	X:20059559-20097521	E3KO	EfCtrl	OK	11.0099	6.58808	-0.740868	-1.98415	0.00095	0.00913113	yes	Chst7	10.0917	7.84776	9.1817	5.25429	6.55574	6.07031
XLOC_033503	XLOC_033503	Cib2	9:54538983-54560218	E3KO	EfCtrl	OK	1.97526	3.89815	0.980749	1.73197	0.0042	0.0303542	yes	Cib2	0.304901	2.22746	2.58632	3.98242	2.80212	4.08451
XLOC_018916	XLOC_018916	Ckap2l	2:129246375-129297212	E3KO	EfCtrl	OK	4.58207	9.23351	1.01088	3.29913	5e-05	0.000724232	yes	Ckap2l	4.64075	3.465	3.6451	9.4112	8.08897	8.74021
XLOC_033072	XLOC_033072	Clasp2	9:113812585-113919697	E3KO	EfCtrl	OK	8.32445	11.806	0.504092	1.63336	0.0047	0.0331644	yes	Clasp2	5.81248	8.59529	7.26319	11.4907	10.1637	11.9963
XLOC_021034	XLOC_021034	Clca1	3:144729676-144760977	E3KO	EfCtrl	OK	21.5269	12.1837	-0.821188	-3.21314	5e-05	0.000724232	yes	Clca1	18.5324	17.8042	19.7512	12.3502	13.0809	9.54327
XLOC_021041	XLOC_021041	Clca5	3:145070264-145099104	E3KO	EfCtrl	OK	76.9613	42.5993	-0.853304	-3.68439	5e-05	0.000724232	yes	Clca5	52.1097	73.9927	73.3273	35.2807	47.4395	37.6195
XLOC_011766	XLOC_011766	Cldn5	16:18776846-18778260	E3KO	EfCtrl	OK	136.146	240.813	0.822757	3.44538	5e-05	0.000724232	yes	Cldn5	97.4822	128.613	114.494	262.865	198.438	197.248
XLOC_007074	XLOC_007074	Clec14a	12:58264719-58269258	E3KO	EfCtrl	OK	30.5858	16.5661	-0.884629	-3.64156	5e-05	0.000724232	yes	Clec14a	27.456	25.5487	27.8993	18.3267	14.6211	15.4162
XLOC_026557	XLOC_026557	Clec4n	6:123229842-123247021	E3KO	EfCtrl	OK	24.0878	8.1223	-1.56834	-2.23979	5e-05	0.000724232	yes	Clec4n	35.5085	10.3431	14.1782	8.19256	10.0633	4.96017
XLOC_034659	XLOC_034659	Cnga2	X:71991848-72010218	E3KO	EfCtrl	OK	11.9891	0.0578173	-7.696	-2.72009	0.0001	0.00134402	yes	Cnga2	28.3826	0.181572	0.204498	0.0559609	0.083907	0.0224471
XLOC_021653	XLOC_021653	Cntln	4:84884308-85131921	E3KO	EfCtrl	OK	2.72674	4.81672	0.820874	1.67926	0.0078	0.0492859	yes	Cntln	2.60313	2.37638	2.07032	4.87493	3.92954	4.73442
XLOC_021429	XLOC_021429	Col15a1	4:47197486-47313167	E3KO	EfCtrl	OK	3.69263	7.26455	0.976222	1.80333	0.00115	0.0106752	yes	Col15a1	3.98536	2.79669	2.65148	5.31043	7.60193	7.52699
XLOC_025793	XLOC_025793	Col1a2	6:4504813-4541543	E3KO	EfCtrl	OK	0.643612	6.85012	3.41187	6.33354	5e-05	0.000724232	yes	Col1a2	0.146062	0.844524	0.648257	1.76708	7.8883	8.63317
XLOC_026892	XLOC_026892	Copg2	6:30723546-30896794	E3KO	EfCtrl	OK	191.632	78.1819	-1.29343	-2.98977	5e-05	0.000724232	yes	Copg2	166.887	145.944	181.816	68.8508	78.516	76.2083
XLOC_007908	XLOC_007908	Cplx2	13:54371348-54383917	E3KO	EfCtrl	OK	4.18466	8.48542	1.01987	3.44218	5e-05	0.000724232	yes	Cplx2	2.42318	4.78797	3.51875	8.62882	7.19459	7.88808
XLOC_031180	XLOC_031180	Crlf1	8:70493157-70504081	E3KO	EfCtrl	OK	16.4618	3.68493	-2.15941	-2.53744	0.0004	0.00443257	yes	Crlf1	11.8803	11.866	18.0724	4.82881	2.52835	3.03653
XLOC_024099	XLOC_024099	Crmp1	5:37242079-37336894	E3KO	EfCtrl	OK	16.5575	30.5223	0.882381	2.90918	5e-05	0.000724232	yes	Crmp1	11.9608	17.6831	12.297	29.6216	28.0643	26.4285
XLOC_032612	XLOC_032612	Cryab	9:50752757-50756633	E3KO	EfCtrl	OK	17.6714	6.23522	-1.5029	-3.70755	5e-05	0.000724232	yes	Cryab	13.5577	12.3483	18.6649	4.05624	8.57722	4.50173
XLOC_020258	XLOC_020258	Cryz	3:154576519-154623182	E3KO	EfCtrl	OK	10.4173	18.7481	0.847758	2.51468	5e-05	0.000724232	yes	Cryz	7.4331	10.5258	8.94105	20.4508	14.4048	18.0638
XLOC_020867	XLOC_020867	Csf1	3:107741047-107760469	E3KO	EfCtrl	OK	56.4234	30.1647	-0.903432	-3.34557	5e-05	0.000724232	yes	Csf1	53.4395	40.6323	48.9426	26.04	31.0585	27.2263
XLOC_004464	XLOC_004464	Csf3	11:98701262-98703629	E3KO	EfCtrl	OK	3.82199	0.752129	-2.34527	-3.26092	5e-05	0.000724232	yes	Csf3	1.91248	2.64095	5.26242	0.741673	0.816971	0.552763
XLOC_002530	XLOC_002530	Csrp2	10:110920176-110939599	E3KO	EfCtrl	OK	8.45782	19.3706	1.19551	3.00595	5e-05	0.000724232	yes	Csrp2	4.71449	9.08444	7.78681	21.9083	15.0403	16.8168
XLOC_033101	XLOC_033101	Ctdspl	9:118926452-119043998	E3KO	EfCtrl	OK	11.5716	19.0407	0.718504	2.62453	5e-05	0.000724232	yes	Ctdspl	7.9267	11.261	10.8481	19.7043	16.299	18.5253
XLOC_002036	XLOC_002036	Ctgf	10:24549440-24598683	E3KO	EfCtrl	OK	320.051	152.082	-1.07345	-4.65361	5e-05	0.000724232	yes	Ctgf	315.913	236.209	264.148	142.276	138.276	148.73
XLOC_008638	XLOC_008638	Ctla2a	13:60934154-60936625	E3KO	EfCtrl	OK	1697.38	1085.05	-0.645548	-2.57558	5e-05	0.000724232	yes	Ctla2a	1761.84	1373.39	1218.67	991.402	1049.26	1034.25
XLOC_008636	XLOC_008636	Ctla2b	13:60895350-60897447	E3KO	EfCtrl	OK	585.078	328.795	-0.831439	-3.55537	5e-05	0.000724232	yes	Ctla2b	551.495	481.652	450.13	276.057	346.119	293.634
XLOC_023376	XLOC_023376	Ctps	4:120539867-120570276	E3KO	EfCtrl	OK	44.8549	25.8017	-0.7978	-3.14418	5e-05	0.000724232	yes	Ctps	47.0411	33.0039	33.8157	24.8235	23.5305	24.0567
XLOC_032881	XLOC_032881	Ctsh	9:90054151-90076089	E3KO	EfCtrl	OK	145.241	81.9453	-0.825713	-3.29493	5e-05	0.000724232	yes	Ctsh	125.607	116.037	132.449	83.169	81.3755	81.7153
XLOC_019926	XLOC_019926	Ctss	3:95526785-95556403	E3KO	EfCtrl	OK	41.1817	26.7811	-0.62079	-2.23711	0.00015	0.00192134	yes	Ctss	35.242	28.0498	41.1224	22.5667	35.5771	16.6908
XLOC_031362	XLOC_031362	Cx3cl1	8:94772008-94782423	E3KO	EfCtrl	OK	4.38327	2.30917	-0.924631	-2.15421	0.00015	0.00192134	yes	Cx3cl1	5.53249	2.76024	2.50784	2.75212	1.80412	1.87047
XLOC_012058	XLOC_012058	Cxadr	16:78301495-78359785	E3KO	EfCtrl	OK	9.75167	16.7487	0.780327	2.0911	0.0006	0.0062413	yes	Cxadr	8.22805	9.31202	8.08277	16.2139	14.247	17.419
XLOC_029479	XLOC_029479	Cxcl17	7:25400052-25412886	E3KO	EfCtrl	OK	2.64788	5.46765	1.04608	1.66741	0.0043	0.0309138	yes	Cxcl17	2.12516	1.90713	2.62941	7.41509	3.51325	4.33983
XLOC_035833	XLOC_035833	Cxx1b	X:53669177-53670408	E3KO	EfCtrl	OK	29.5063	12.2783	-1.26491	-3.60024	5e-05	0.000724232	yes	Cxx1b	25.3814	23.0868	24.4146	11.8712	11.5548	10.0598
XLOC_034513	XLOC_034513	Cxx1c	X:53577086-53609132	E3KO	EfCtrl	OK	8.73843	3.61739	-1.27243	-1.5749	0.0074	0.0472642	yes	Cxx1c	4.82028	10.3315	7.41699	3.95842	3.07943	3.03491
XLOC_014206	XLOC_014206	Cyp1b1	17:79706952-79715041	E3KO	EfCtrl	OK	9.67614	3.81047	-1.34446	-4.21808	5e-05	0.000724232	yes	Cyp1b1	4.54179	8.45993	12.8712	1.38612	5.95306	3.68354
XLOC_013241	XLOC_013241	Cyp39a1	17:43667424-43751431	E3KO	EfCtrl	OK	3.03274	5.42628	0.839344	2.3657	5e-05	0.000724232	yes	Cyp39a1	2.1866	2.83325	2.94652	5.95382	4.5765	5.05085
XLOC_023285	XLOC_023285	Cyp4b1	4:115624724-115647709	E3KO	EfCtrl	OK	14.649	26.6976	0.865904	2.57604	5e-05	0.000724232	yes	Cyp4b1	10.2033	13.5371	13.4879	26.0389	24.8392	23.4895
XLOC_024858	XLOC_024858	Cyp51	5:4081144-4104746	E3KO	EfCtrl	OK	11.3788	3.99534	-1.50996	-1.97076	0.00015	0.00192134	yes	Cyp51	13.1321	5.5356	10.7847	4.89241	3.14785	3.35021
XLOC_021042	XLOC_021042	Cyr61	3:145646970-145649985	E3KO	EfCtrl	OK	63.3257	36.9393	-0.777634	-3.08582	5e-05	0.000724232	yes	Cyr61	58.6218	44.9068	55.6432	37.2228	32.1156	33.2376
XLOC_018206	XLOC_018206	Cytip	2:58129136-58195532	E3KO	EfCtrl	OK	2.24586	0.423737	-2.40603	-1.67126	0.0001	0.00134402	yes	Cytip	4.38755	0.377491	0.616903	0.111297	0.616191	0.450982
XLOC_010458	XLOC_010458	Dach1	14:97786852-98169765	E3KO	EfCtrl	OK	1.20707	2.14837	0.831732	1.99071	0.001	0.00952306	yes	Dach1	0.913233	1.02588	1.25278	1.88425	2.37839	1.99098
XLOC_024784	XLOC_024784	Daglb	5:143464492-143504442	E3KO	EfCtrl	OK	9.88388	16.7399	0.760143	2.54752	5e-05	0.000724232	yes	Daglb	4.43878	11.2017	9.89577	15.9828	14.2101	16.5042
XLOC_032757	XLOC_032757	Dapk2	9:66158222-66272242	E3KO	EfCtrl	OK	39.0956	27.0353	-0.532164	-1.99987	0.00025	0.00297984	yes	Dapk2	27.4533	37.2352	34.4758	23.8114	25.1584	25.8107
XLOC_022978	XLOC_022978	Dbc1	4:68761513-68954397	E3KO	EfCtrl	OK	3.24717	1.634	-0.990776	-2.17411	0.0001	0.00134402	yes	Dbc1	2.4764	2.50729	3.00624	1.38507	1.19531	1.9817
XLOC_022593	XLOC_022593	Decr1	4:15917239-15945507	E3KO	EfCtrl	OK	6.98178	4.23307	-0.721891	-2.08151	0.0004	0.00443257	yes	Decr1	8.34557	4.10336	5.66475	4.07727	4.17743	3.94532
XLOC_026947	XLOC_026947	Dennd2a	6:39462377-39557867	E3KO	EfCtrl	OK	5.10651	8.23788	0.689935	2.01136	0.0002	0.00245954	yes	Dennd2a	3.61673	5.1034	4.35241	7.8582	6.34479	8.56997
XLOC_020273	XLOC_020273	Depdc1a	3:159495432-159529955	E3KO	EfCtrl	OK	0.82374	3.29738	2.00106	3.32973	5e-05	0.000724232	yes	Depdc1a	0.0893299	0.826682	1.3485	2.97676	3.37941	3.3515
XLOC_021810	XLOC_021810	Dhcr24	4:106561037-106589113	E3KO	EfCtrl	OK	7.34546	4.75181	-0.628375	-1.82617	0.0011	0.0102983	yes	Dhcr24	4.98524	5.81213	7.61908	5.65117	4.00333	3.52745
XLOC_010447	XLOC_010447	Diap3	14:86655366-87141224	E3KO	EfCtrl	OK	4.58196	7.02025	0.615557	2.0282	0.0005	0.00535591	yes	Diap3	3.66301	3.56061	4.73269	6.62835	6.53103	6.96755
XLOC_033476	XLOC_033476	Dixdc1	9:50662751-50739517	E3KO	EfCtrl	OK	1.87357	3.72229	0.990404	1.47704	0.00355	0.0265861	yes	Dixdc1	0.957174	1.91077	1.80369	2.67923	2.59965	4.51032
XLOC_020160	XLOC_020160	Dkk2	3:132085291-132180293	E3KO	EfCtrl	OK	4.04548	11.3969	1.49426	4.92157	5e-05	0.000724232	yes	Dkk2	3.1392	4.44576	2.87642	11.7423	9.05465	11.4227
XLOC_010132	XLOC_010132	Dlgap5	14:47387778-47418407	E3KO	EfCtrl	OK	5.59361	10.625	0.925604	1.82169	0.00215	0.0177943	yes	Dlgap5	5.73797	4.60764	4.47176	10.1314	11.2448	8.10208
XLOC_017100	XLOC_017100	Dll4	2:119321186-119335962	E3KO	EfCtrl	OK	5.42706	8.242	0.602823	1.84835	0.0013	0.0118058	yes	Dll4	3.12646	5.23642	5.52745	9.40171	6.64955	7.04785
XLOC_001328	XLOC_001328	Dock10	1:80501072-80758553	E3KO	EfCtrl	OK	1.4416	3.33866	1.2116	3.65285	5e-05	0.000724232	yes	Dock10	0.684212	1.69739	1.39938	3.12051	2.95571	3.3878
XLOC_015289	XLOC_015289	Dock8	19:24999528-25202432	E3KO	EfCtrl	OK	13.2441	6.98328	-0.923376	-3.66946	5e-05	0.000724232	yes	Dock8	8.77829	11.7542	13.2473	5.5044	7.29863	6.60721
XLOC_017320	XLOC_017320	Dtd1	2:144599896-144768758	E3KO	EfCtrl	OK	8.07514	12.3153	0.608888	1.64363	0.0043	0.0309138	yes	Dtd1	4.36582	8.54232	7.55974	13.9197	8.73378	11.1435
XLOC_006270	XLOC_006270	Dtnb	12:3572380-3781796	E3KO	EfCtrl	OK	11.0147	5.83756	-0.915997	-1.96963	0.00015	0.00192134	yes	Dtnb	8.59485	8.75809	10.9647	5.8314	5.7946	4.91761
XLOC_025500	XLOC_025500	Dtx1	5:120680201-120711927	E3KO	EfCtrl	OK	0.534509	4.06125	2.92564	3.97422	5e-05	0.000724232	yes	Dtx1	0.279555	0.872463	0.215289	4.72279	2.34798	4.23723
XLOC_027635	XLOC_027635	Dusp16	6:134715472-134792625	E3KO	EfCtrl	OK	5.53381	8.45893	0.612203	1.51786	0.0044	0.0314835	yes	Dusp16	5.98692	5.4436	2.4388	6.79272	7.69618	8.21207
XLOC_005973	XLOC_005973	Dusp3	11:101971142-101992264	E3KO	EfCtrl	OK	35.702	56.2678	0.656303	2.36293	5e-05	0.000724232	yes	Dusp3	28.5244	34.2971	28.6818	56.0649	49.5345	54.3295
XLOC_034682	XLOC_034682	Dusp9	X:73639418-73643514	E3KO	EfCtrl	OK	1.17433	3.15561	1.42608	2.65288	5e-05	0.000724232	yes	Dusp9	0.385489	1.43641	1.18186	3.64803	2.23463	2.8466
XLOC_010512	XLOC_010512	Dzip1	14:118875519-118925314	E3KO	EfCtrl	OK	7.67087	4.66779	-0.716651	-2.34475	5e-05	0.000724232	yes	Dzip1	6.09969	6.70587	6.92371	4.63278	4.47366	4.11062
XLOC_030678	XLOC_030678	Ebf3	7:137193672-137314445	E3KO	EfCtrl	OK	1.5768	3.61536	1.19714	3.01901	5e-05	0.000724232	yes	Ebf3	0.531446	1.64421	1.99826	3.82974	2.68799	3.81627
XLOC_010311	XLOC_010311	Ebpl	14:61339762-61360445	E3KO	EfCtrl	OK	4.00664	6.15044	0.618296	1.52097	0.00785	0.0495383	yes	Ebpl	1.68827	4.01942	4.68454	5.33772	5.24416	6.66773
XLOC_020729	XLOC_020729	Ecm1	3:95734146-95739569	E3KO	EfCtrl	OK	103.973	72.8923	-0.512366	-1.72495	0.00345	0.0260091	yes	Ecm1	68.5338	86.2969	92.6257	64.8262	77.5112	51.0245
XLOC_007845	XLOC_007845	Edn1	13:42301269-42307989	E3KO	EfCtrl	OK	193.523	96.2349	-1.00788	-4.36439	5e-05	0.000724232	yes	Edn1	186.31	141.408	163.693	92.1609	79.3571	98.9092
XLOC_010483	XLOC_010483	Ednrb	14:103814624-103844173	E3KO	EfCtrl	OK	131.397	63.2763	-1.05419	-4.58842	5e-05	0.000724232	yes	Ednrb	83.3777	123.523	143.168	59.6248	73.3716	50.8394
XLOC_030205	XLOC_030205	Eed	7:89954655-89981848	E3KO	EfCtrl	OK	33.5231	23.4277	-0.51694	-1.90914	0.00045	0.00489747	yes	Eed	39.4752	22.8814	23.6	19.0607	22.1369	25.4808
XLOC_008499	XLOC_008499	Eef1e1	13:38645697-38659028	E3KO	EfCtrl	OK	20.8636	10.4051	-1.00369	-2.75825	5e-05	0.000724232	yes	Eef1e1	28.1296	13.2146	12.3062	9.42816	9.08891	11.3591
XLOC_028838	XLOC_028838	Eef2k	7:120842830-120907219	E3KO	EfCtrl	OK	5.14106	8.09875	0.655635	1.84572	0.0006	0.0062413	yes	Eef2k	1.95091	6.05727	5.05129	7.70383	6.88757	7.46378
XLOC_003583	XLOC_003583	Efemp1	11:28853203-28926743	E3KO	EfCtrl	OK	4.44199	1.86668	-1.25073	-2.02491	0.0022	0.0181411	yes	Efemp1	0.298742	4.19186	8.10238	0.689076	2.88166	1.86062
XLOC_000062	XLOC_000062	Efhc1	1:20951625-20990838	E3KO	EfCtrl	OK	2.75798	1.48337	-0.894729	-1.67804	0.0036	0.0268779	yes	Efhc1	3.70398	1.67108	1.57226	0.951082	1.3867	1.8144
XLOC_014502	XLOC_014502	Eif1a	18:46597703-46610225	E3KO	EfCtrl	OK	60.1736	28.9512	-1.05551	-3.60871	5e-05	0.000724232	yes	Eif1a	62.6399	44.8419	49.887	25.253	30.3009	28.414
XLOC_000251	XLOC_000251	Eif4a-ps4	1:60703917-60705656	E3KO	EfCtrl	OK	19.2164	10.9817	-0.80724	-2.14459	0.0002	0.00245954	yes	Eif4a-ps4	37.7262	4.6881	4.31607	10.9546	10.405	9.25105
XLOC_011818	XLOC_011818	Eif4a2	16:23107443-23127737	E3KO	EfCtrl	OK	599.684	151.924	-1.98085	-10.1645	5e-05	0.000724232	yes	Eif4a2	170.233	157.582	149.362	157.522	151.981	141.18
XLOC_019540	XLOC_019540	Eif5a2	3:28781310-28798846	E3KO	EfCtrl	OK	5.46953	8.61752	0.655855	2.28332	5e-05	0.000724232	yes	Eif5a2	2.78197	5.96168	6.16652	8.60904	7.64603	9.35404
XLOC_020147	XLOC_020147	Elovl6	3:129532385-129638495	E3KO	EfCtrl	OK	4.21051	2.59217	-0.699835	-2.21093	0.0001	0.00134402	yes	Elovl6	4.27991	3.39857	3.26916	2.62241	2.18158	2.64591
XLOC_020181	XLOC_020181	Emcn	3:137341066-137432185	E3KO	EfCtrl	OK	1743.82	1021.02	-0.772232	-2.9125	5e-05	0.000724232	yes	Emcn	1556.62	1452.13	1476.57	876.898	1043.75	965.926
XLOC_011518	XLOC_011518	Endou	15:97711018-97731405	E3KO	EfCtrl	OK	2.09116	0.991594	-1.07648	-1.95855	0.00105	0.00990498	yes	Endou	2.22823	1.33667	1.68889	0.914261	1.27206	0.587073
XLOC_002782	XLOC_002782	Enpp3	10:24773813-24836195	E3KO	EfCtrl	OK	5.88311	9.30114	0.660827	2.09874	0.00015	0.00192134	yes	Enpp3	5.13244	4.70852	5.27956	9.63118	6.38061	10.3091
XLOC_015376	XLOC_015376	Entpd1	19:40612365-40741602	E3KO	EfCtrl	OK	103.692	28.6154	-1.85744	-2.75755	5e-05	0.000724232	yes	Entpd1	98.6223	75.2511	122.213	29.2862	27.5081	29.1488
XLOC_010390	XLOC_010390	Epb4.9	14:70602183-70636048	E3KO	EfCtrl	OK	21.9535	31.2758	0.510597	2.05562	0.0001	0.00134402	yes	Epb4.9	21.2374	17.8666	15.3339	32.5165	26.7825	27.5632
XLOC_033777	XLOC_033777	Ephb1	9:101922127-102354694	E3KO	EfCtrl	OK	12.8337	26.4289	1.04218	4.14982	5e-05	0.000724232	yes	Ephb1	8.14215	13.8621	10.5425	25.9694	22.9543	23.9261
XLOC_036198	XLOC_036198	Ercc6l	X:102141715-102157091	E3KO	EfCtrl	OK	1.15643	2.528	1.12832	2.89539	5e-05	0.000724232	yes	Ercc6l	0.949306	0.891063	1.16697	2.61814	2.14576	2.47261
XLOC_031634	XLOC_031634	Erich1	8:14027564-14090327	E3KO	EfCtrl	OK	12.5155	7.17017	-0.803641	-2.28261	0.00025	0.00297984	yes	Erich1	15.7371	7.73782	7.50176	7.59825	6.83783	5.48784
XLOC_009650	XLOC_009650	Esd	14:74732296-74750765	E3KO	EfCtrl	OK	413.163	232.779	-0.827752	-2.97069	5e-05	0.000724232	yes	Esd	329.08	375.325	352.103	192.458	253.321	204.062
XLOC_008200	XLOC_008200	Esm1	13:113171607-113225908	E3KO	EfCtrl	OK	92.7331	39.9547	-1.21472	-4.99382	5e-05	0.000724232	yes	Esm1	74.8348	76.5823	90.1075	30.3683	46.1309	38.0228
XLOC_001935	XLOC_001935	Esr1	10:4611592-5005614	E3KO	EfCtrl	OK	3.16898	0.562113	-2.49508	-3.28627	5e-05	0.000724232	yes	Esr1	6.75699	0.422542	0.492881	0.554135	0.549567	0.288656
XLOC_006620	XLOC_006620	Esrrb	12:86361116-86521628	E3KO	EfCtrl	OK	3.84862	0.310296	-3.63262	-3.71202	5e-05	0.000724232	yes	Esrrb	8.53298	0.308283	0.32801	0.423424	0.143653	0.288571
XLOC_027951	XLOC_027951	Exoc3l2	7:19489055-19496760	E3KO	EfCtrl	OK	12.5185	6.63757	-0.91534	-2.63349	5e-05	0.000724232	yes	Exoc3l2	8.81818	10.2942	12.5701	5.46285	6.93044	5.92341
XLOC_033152	XLOC_033152	Exosc7	9:123113214-123136129	E3KO	EfCtrl	OK	6.24588	10.2036	0.708108	1.64006	0.0065	0.0426884	yes	Exosc7	2.51414	6.65523	6.61668	9.13008	8.43022	10.0754
XLOC_026991	XLOC_026991	Ezh2	6:47530273-47595341	E3KO	EfCtrl	OK	8.26162	12.0432	0.543722	1.61722	0.00385	0.028343	yes	Ezh2	5.5673	8.50715	7.55819	11.0035	12.0491	11.6494
XLOC_008802	XLOC_008802	F2rl1	13:95511731-95525240	E3KO	EfCtrl	OK	12.9518	41.3817	1.67584	6.1495	5e-05	0.000724232	yes	F2rl1	11.4989	13.9757	7.74599	38.2703	32.6647	45.6333
XLOC_031230	XLOC_031230	F2rl3	8:72761879-72763874	E3KO	EfCtrl	OK	12.1024	6.25808	-0.951499	-2.52408	5e-05	0.000724232	yes	F2rl3	9.30421	9.57492	11.37	4.50288	6.56341	6.00593
XLOC_005560	XLOC_005560	Fam101b	11:76019193-76027782	E3KO	EfCtrl	OK	38.0393	15.7787	-1.26952	-5.03592	5e-05	0.000724232	yes	Fam101b	31.3514	27.3118	38.5925	13.5157	14.0427	16.8302
XLOC_006375	XLOC_006375	Fam110c	12:31073967-31079937	E3KO	EfCtrl	OK	23.6727	12.4077	-0.931986	-3.38028	5e-05	0.000724232	yes	Fam110c	21.8231	17.9257	20.5749	9.48408	13.9058	11.4555
XLOC_026982	XLOC_026982	Fam115c	6:42623018-42645254	E3KO	EfCtrl	OK	3.36169	1.86108	-0.853045	-2.25542	5e-05	0.000724232	yes	Fam115c	2.95308	2.78611	2.87782	1.40999	2.20509	1.69671
XLOC_010599	XLOC_010599	Fam134b	15:25843263-25973687	E3KO	EfCtrl	OK	7.65177	17.3495	1.18103	4.11799	5e-05	0.000724232	yes	Fam134b	4.68003	7.31468	7.31848	15.5629	15.8945	17.4624
XLOC_009585	XLOC_009585	Fam167a	14:63436393-63465498	E3KO	EfCtrl	OK	1.12106	2.74587	1.2924	2.74992	5e-05	0.000724232	yes	Fam167a	1.10979	1.02785	0.720736	2.75767	2.4745	2.51349
XLOC_026925	XLOC_026925	Fam180a	6:35312745-35326141	E3KO	EfCtrl	OK	1.003	5.62424	2.48734	4.11161	5e-05	0.000724232	yes	Fam180a	0.0642918	0.910802	1.65522	6.02989	4.14814	5.78389
XLOC_015752	XLOC_015752	Fam189a2	19:23972750-24031019	E3KO	EfCtrl	OK	6.11562	12.5009	1.03146	3.05958	5e-05	0.000724232	yes	Fam189a2	3.59432	6.26325	5.58228	13.6515	9.44271	11.3045
XLOC_019805	XLOC_019805	Fam189b	3:89183142-89189295	E3KO	EfCtrl	OK	1.85169	4.09925	1.14652	1.9222	0.00015	0.00192134	yes	Fam189b	0.674652	2.04373	2.05605	4.59763	3.53316	3.61072
XLOC_004066	XLOC_004066	Fam64a	11:72042031-72047370	E3KO	EfCtrl	OK	4.34853	9.45147	1.12001	2.66409	5e-05	0.000724232	yes	Fam64a	2.8277	3.98953	4.16558	10.4719	6.98651	8.70542
XLOC_000600	XLOC_000600	Fam72a	1:131527902-131539872	E3KO	EfCtrl	OK	5.95825	2.68228	-1.15143	-2.65164	5e-05	0.000724232	yes	Fam72a	10.5174	2.62086	2.25629	2.85734	2.40313	2.62485
XLOC_017516	XLOC_017516	Fam83d	2:158768092-158786637	E3KO	EfCtrl	OK	4.20117	9.24739	1.13826	3.00055	5e-05	0.000724232	yes	Fam83d	2.629	4.59772	3.56029	7.25059	8.47357	9.99294
XLOC_006930	XLOC_006930	Fam84a	12:14147598-14152038	E3KO	EfCtrl	OK	6.2375	2.98884	-1.06138	-2.8173	5e-05	0.000724232	yes	Fam84a	4.12048	5.24006	6.90233	2.34017	4.10987	2.04988
XLOC_035424	XLOC_035424	Fancb	X:164980591-164997272	E3KO	EfCtrl	OK	2.61974	4.25742	0.700553	1.80899	0.002	0.0167846	yes	Fancb	2.3799	2.42981	2.09202	3.81358	4.71261	3.81471
XLOC_009749	XLOC_009749	Farp1	14:121035199-121283744	E3KO	EfCtrl	OK	11.695	18.1294	0.632438	2.29003	5e-05	0.000724232	yes	Farp1	9.41831	11.0039	9.29152	16.9958	16.9798	17.2414
XLOC_031064	XLOC_031064	Fat1	8:44950207-45052257	E3KO	EfCtrl	OK	9.20455	4.90381	-0.908443	-3.67118	5e-05	0.000724232	yes	Fat1	5.69061	7.55212	10.238	3.96213	5.04502	4.57376
XLOC_010896	XLOC_010896	Fbln1	15:85205948-85286535	E3KO	EfCtrl	OK	1.54414	3.84132	1.3148	2.11841	0.0003	0.00348276	yes	Fbln1	0.0549637	1.9569	1.96653	2.81795	3.23828	4.44591
XLOC_018868	XLOC_018868	Fbn1	2:125300593-125507993	E3KO	EfCtrl	OK	4.31526	10.1577	1.23505	3.92458	5e-05	0.000724232	yes	Fbn1	3.56263	3.78243	3.54987	9.18869	7.54643	11.2966
XLOC_001756	XLOC_001756	Fcer1g	1:171229571-171234365	E3KO	EfCtrl	OK	37.959	20.7649	-0.870293	-2.34246	5e-05	0.000724232	yes	Fcer1g	26.4621	32.5635	37.3938	20.1368	22.9098	14.7769
XLOC_001752	XLOC_001752	Fcgr3	1:171051173-171064935	E3KO	EfCtrl	OK	9.29452	4.93173	-0.914287	-2.21045	5e-05	0.000724232	yes	Fcgr3	7.21486	7.0518	9.58235	4.42777	6.32291	3.16406
XLOC_012356	XLOC_012356	Fgf12	16:28160119-28445227	E3KO	EfCtrl	OK	4.86984	7.44057	0.61154	1.92075	0.00075	0.007507	yes	Fgf12	3.39813	5.34312	4.40847	6.87171	7.77708	7.3964
XLOC_023956	XLOC_023956	Fgl2	5:21292960-21424677	E3KO	EfCtrl	OK	4.64602	19.2578	2.05138	6.80308	5e-05	0.000724232	yes	Fgl2	6.10817	3.26279	2.87043	24.1081	11.6686	21.0571
XLOC_034558	XLOC_034558	Fhl1	X:56731786-56793346	E3KO	EfCtrl	OK	40.3612	112.879	1.48374	6.00039	5e-05	0.000724232	yes	Fhl1	30.4536	45.4272	28.251	105.767	98.5868	116.886
XLOC_004909	XLOC_004909	Fignl1	11:11787430-11808962	E3KO	EfCtrl	OK	2.0541	5.96028	1.53687	2.10022	0.00045	0.00489747	yes	Fignl1	0.958251	2.27685	2.17306	6.57399	5.10953	5.19113
XLOC_019238	XLOC_019238	Fitm2	2:163466378-163473003	E3KO	EfCtrl	OK	8.56927	5.99674	-0.514996	-1.68521	0.003	0.0232558	yes	Fitm2	5.2519	8.2747	8.62121	5.2843	6.23099	5.40735
XLOC_006904	XLOC_006904	Fkbp1b	12:4833174-4841595	E3KO	EfCtrl	OK	3.41955	7.50412	1.13388	2.06478	0.00105	0.00990498	yes	Fkbp1b	0.415211	4.10388	4.25272	7.07163	6.23332	7.29143
XLOC_018336	XLOC_018336	Fkbp7	2:76663043-76673116	E3KO	EfCtrl	OK	60.2977	39.5381	-0.608861	-2.14819	0.00035	0.00396199	yes	Fkbp7	45.0333	55.2838	54.1356	36.9834	40.3556	33.574
XLOC_025756	XLOC_025756	Flt1	5:147561603-147726011	E3KO	EfCtrl	OK	13.9806	5.34153	-1.38811	-2.9904	5e-05	0.000724232	yes	Flt1	9.32001	9.60572	11.7925	4.02716	5.53224	4.36676
XLOC_017050	XLOC_017050	Fmn1	2:113327735-113716767	E3KO	EfCtrl	OK	10.6292	5.51211	-0.94736	-1.37272	0.00615	0.040851	yes	Fmn1	8.26135	9.38866	11.7173	4.50812	6.67036	4.35508
XLOC_025015	XLOC_025015	Fndc4	5:31292254-31295877	E3KO	EfCtrl	OK	0.782884	2.32298	1.56911	2.1257	0.0017	0.0147224	yes	Fndc4	0.0500795	1.12744	0.86317	2.99498	1.8018	1.67712
XLOC_025825	XLOC_025825	Foxp2	6:14901348-15441977	E3KO	EfCtrl	OK	4.30518	9.40774	1.12778	1.14048	0.0036	0.0268779	yes	Foxp2	4.27902	4.07506	3.3092	10.4662	7.98744	8.98453
XLOC_020093	XLOC_020093	Frrs1	3:116878226-116903750	E3KO	EfCtrl	OK	14.0484	5.80666	-1.27463	-3.97624	5e-05	0.000724232	yes	Frrs1	9.41955	12.4305	14.379	4.86749	6.15691	5.30776
XLOC_008899	XLOC_008899	Fst	13:114452261-114458730	E3KO	EfCtrl	OK	13.5597	7.94226	-0.7717	-2.4578	5e-05	0.000724232	yes	Fst	8.87756	11.6141	14.8362	7.65836	8.17952	6.77594
XLOC_015171	XLOC_015171	Fth1	19:9982702-9985092	E3KO	EfCtrl	OK	6657.49	4398.5	-0.597968	-2.26827	0.00015	0.00192134	yes	Fth1	5219.98	5700.39	5867.11	3900.4	4206.71	4032.6
XLOC_006544	XLOC_006544	Fut8	12:77238103-77476338	E3KO	EfCtrl	OK	19.8794	13.2626	-0.583909	-2.20083	0.00015	0.00192134	yes	Fut8	19.981	14.9411	16.1244	11.8432	12.1075	13.6311
XLOC_032584	XLOC_032584	Fxyd6	9:45370184-45396158	E3KO	EfCtrl	OK	29.1497	101.507	1.80002	6.87909	5e-05	0.000724232	yes	Fxyd6	23.1253	30.2559	20.0826	119.147	67.0871	95.1505
XLOC_024859	XLOC_024859	Fzd1	5:4753841-4758216	E3KO	EfCtrl	OK	2.56857	1.275	-1.01047	-2.11543	0.00055	0.00580945	yes	Fzd1	3.55128	1.46661	1.33857	1.14552	1.05223	1.37122
XLOC_002357	XLOC_002357	Gadd45b	10:80930090-80932204	E3KO	EfCtrl	OK	2.98348	8.07079	1.43571	2.73618	5e-05	0.000724232	yes	Gadd45b	0.695732	3.53923	3.42474	7.60995	5.8989	8.62877
XLOC_018256	XLOC_018256	Galnt3	2:66082765-66124994	E3KO	EfCtrl	OK	10.1917	3.04195	-1.74433	-2.67724	5e-05	0.000724232	yes	Galnt3	10.2106	7.06351	9.32558	1.5768	3.17398	3.90463
XLOC_020207	XLOC_020207	Gbp3	3:142560051-142573209	E3KO	EfCtrl	OK	16.4588	9.41684	-0.805549	-2.69211	5e-05	0.000724232	yes	Gbp3	19.8265	11.8124	10.1399	8.61361	11.7617	6.36704
XLOC_003368	XLOC_003368	Gdf11	10:128882294-128891718	E3KO	EfCtrl	OK	3.80715	2.24565	-0.761577	-2.0071	0.0004	0.00443257	yes	Gdf11	4.64361	2.39263	2.58588	1.82696	1.88202	2.60116
XLOC_006921	XLOC_006921	Gen1	12:11240925-11265787	E3KO	EfCtrl	OK	1.0706	2.22339	1.05434	2.23007	0.0003	0.00348276	yes	Gen1	0.651189	0.928946	1.23175	2.10067	2.244	2.02713
XLOC_026347	XLOC_026347	Gfpt1	6:87042845-87092197	E3KO	EfCtrl	OK	19.8087	13.0732	-0.599528	-2.23654	5e-05	0.000724232	yes	Gfpt1	13.2353	18.4162	19.6868	12.7745	12.4958	12.0095
XLOC_023461	XLOC_023461	Gja4	4:127311420-127314039	E3KO	EfCtrl	OK	1.33637	3.29116	1.30028	2.08936	0.00115	0.0106752	yes	Gja4	1.12996	1.13372	1.05291	3.48815	2.33359	3.18453
XLOC_019967	XLOC_019967	Gja5	3:97032415-97053634	E3KO	EfCtrl	OK	0.917008	2.12098	1.20973	2.08658	0.0003	0.00348276	yes	Gja5	1.11191	0.855339	0.347217	2.00124	1.59887	2.32322
XLOC_006001	XLOC_006001	Gjc1	11:102799578-102819700	E3KO	EfCtrl	OK	7.22429	12.9183	0.83849	2.44377	5e-05	0.000724232	yes	Gjc1	5.31774	7.27426	6.45383	12.3386	10.4103	13.4395
XLOC_034214	XLOC_034214	Gm6787,Psmb7-ps2	X:8097086-8106701	E3KO	EfCtrl	OK	3.13635	0.289736	-3.43628	-3.50559	5e-05	0.000724232	yes	Gm6787,Psmb7-ps2	3.64433	0.0418485	0.162519	0.0487052	0.218723	0.141244
XLOC_020060	XLOC_020060	Gnat2	3:108092788-108101432	E3KO	EfCtrl	OK	2.66489	0.376725	-2.82249	-2.57716	0.0004	0.00443257	yes	Gnat2	5.66412	0.283124	0.345497	0.157144	0.756883	0.169576
XLOC_008624	XLOC_008624	Golm1	13:59634995-59675784	E3KO	EfCtrl	OK	7.3798	4.73966	-0.638799	-2.05334	0.00055	0.00580945	yes	Golm1	3.76958	6.86555	8.39391	4.12089	4.60959	4.53734
XLOC_012288	XLOC_012288	Gp1bb,Sept5	16:18620318-18629938	E3KO	EfCtrl	OK	2.95369	5.59656	0.922023	2.05965	0.0007	0.00709513	yes	Gp1bb,Sept5	0.660022	1.66945	1.6538	2.99074	2.75361	2.1606
XLOC_002131	XLOC_002131	Gp49a,Lilrb4	10:51480631-51496613	E3KO	EfCtrl	OK	16.2041	10.1875	-0.66956	-2.01419	0.00035	0.00396199	yes	Gp49a,Lilrb4	7.13616	7.10968	7.2464	3.82721	6.86095	4.06596
XLOC_029626	XLOC_029626	Gpatch1	7:35276535-35318440	E3KO	EfCtrl	OK	3.32359	4.86238	0.548922	1.52581	0.00745	0.0475082	yes	Gpatch1	2.08748	3.09481	3.23676	4.09689	4.21532	5.03914
XLOC_035329	XLOC_035329	Gpr143	X:152781920-152808646	E3KO	EfCtrl	OK	6.59836	3.93921	-0.744202	-1.62644	0.0045	0.0320548	yes	Gpr143	1.75472	8.15526	7.49275	3.6271	2.96565	4.35437
XLOC_030529	XLOC_030529	Gprc5b	7:118740225-118995211	E3KO	EfCtrl	OK	47.7922	81.5303	0.770561	2.15896	0.0002	0.00245954	yes	Gprc5b	30.2682	52.5172	39.5483	80.7406	71.5936	75.3909
XLOC_008893	XLOC_008893	Gpx8	13:113035110-113091195	E3KO	EfCtrl	OK	53.1608	29.4427	-0.852454	-3.01145	5e-05	0.000724232	yes	Gpx8	49.677	40.3173	46.7291	25.1521	31.3047	26.8723
XLOC_000064	XLOC_000064	Gsta3	1:21240588-21265361	E3KO	EfCtrl	OK	4.56761	1.36862	-1.73871	-2.62496	5e-05	0.000724232	yes	Gsta3	5.01072	2.79911	3.78518	0.424889	2.05367	1.32303
XLOC_020871	XLOC_020871	Gstm2	3:107981701-107986453	E3KO	EfCtrl	OK	20.5207	13.9292	-0.558963	-1.6432	0.00415	0.0300799	yes	Gstm2	13.9191	18.3231	20.2265	14.0827	12.5667	12.8897
XLOC_015456	XLOC_015456	Gsto1	19:47737560-47919299	E3KO	EfCtrl	OK	202.815	85.8595	-1.24011	-3.01009	5e-05	0.000724232	yes	Gsto1	189.055	146.858	176.325	72.6962	82.4647	83.5536
XLOC_031025	XLOC_031025	Gtf2e2	8:33731913-33777173	E3KO	EfCtrl	OK	41.6178	27.4114	-0.602424	-2.20055	0.0001	0.00134402	yes	Gtf2e2	51.7339	26.9395	27.4591	26.3354	25.332	26.4503
XLOC_013805	XLOC_013805	H2-K1	17:33996016-34000333	E3KO	EfCtrl	OK	85.983	126.282	0.554528	2.15399	5e-05	0.000724232	yes	H2-K1	87.8766	57.7417	40.3546	126.263	95.8081	84.5733
XLOC_013184	XLOC_013184	H2-M3	17:37270219-37274484	E3KO	EfCtrl	OK	3.54494	6.11297	0.786112	1.74188	0.00305	0.0235647	yes	H2-M3	2.51545	4.10144	2.31998	5.6543	5.6577	5.39485
XLOC_032562	XLOC_032562	H2afx	9:44334714-44336071	E3KO	EfCtrl	OK	5.35038	10.2248	0.934366	1.81308	0.0029	0.0226265	yes	H2afx	2.91856	5.68887	5.02996	11.9438	9.6429	6.71973
XLOC_020186	XLOC_020186	H2afz	3:137864486-137866922	E3KO	EfCtrl	OK	48.3629	91.5971	0.921403	1.73732	0.00365	0.0271648	yes	H2afz	19.9206	45.0327	56.7464	83.8763	77.9427	85.5363
XLOC_014824	XLOC_014824	Hbegf	18:36504928-36515805	E3KO	EfCtrl	OK	7.73476	3.09718	-1.3204	-3.29027	5e-05	0.000724232	yes	Hbegf	7.96703	4.57597	7.04056	2.07526	3.90709	2.69359
XLOC_011918	XLOC_011918	Hcls1	16:36934982-36963212	E3KO	EfCtrl	OK	12.3743	7.05649	-0.810318	-2.07153	0.0005	0.00535591	yes	Hcls1	7.35783	10.121	13.1781	5.91774	7.44372	5.70979
XLOC_001392	XLOC_001392	Hdac4	1:91928784-91931176	E3KO	EfCtrl	OK	1.86126	3.48195	0.903613	1.79428	0.00285	0.0223185	yes	Hdac4	0.471189	1.62659	1.71405	2.57249	1.7774	2.48068
XLOC_004628	XLOC_004628	Helz	11:107531756-107693826	E3KO	EfCtrl	OK	12.1347	8.41735	-0.527704	-1.73199	0.00125	0.0114398	yes	Helz	10.4007	10.0705	11.9271	7.87701	8.52589	9.49609
XLOC_034859	XLOC_034859	Heph	X:96306177-96574485	E3KO	EfCtrl	OK	5.84362	3.24067	-0.85057	-2.35667	0.00015	0.00192134	yes	Heph	5.55511	3.44246	4.44727	2.89881	2.65646	3.60728
XLOC_026160	XLOC_026160	Herc6	6:57580991-57665136	E3KO	EfCtrl	OK	1.24174	2.36705	0.930728	2.42269	0.0001	0.00134402	yes	Herc6	0.627134	1.35716	1.37167	2.03635	2.66366	2.2825
XLOC_008814	XLOC_008814	Hexb	13:97137936-97198357	E3KO	EfCtrl	OK	65.9579	95.3729	0.532034	2.0355	0.00045	0.00489747	yes	Hexb	39.7766	70.6564	63.5228	86.0777	89.1442	99.0884
XLOC_020286	XLOC_020286	Hey1	3:8663361-8667039	E3KO	EfCtrl	OK	3.08153	5.7047	0.888506	2.04704	0.0006	0.0062413	yes	Hey1	2.04697	2.99248	2.91426	5.42866	5.07775	5.54227
XLOC_025871	XLOC_025871	Hilpda	6:29272487-29275446	E3KO	EfCtrl	OK	61.0944	38.171	-0.678565	-2.35196	5e-05	0.000724232	yes	Hilpda	56.8701	49.2764	48.6734	39.0377	33.9063	34.0603
XLOC_008395	XLOC_008395	Hist1h2ac	13:23681466-23683948	E3KO	EfCtrl	OK	2.57609	1.28544	-1.00292	-1.93695	0.0012	0.0110638	yes	Hist1h2ac	1.36415	2.15902	3.23771	1.31049	1.38574	0.981636
XLOC_027237	XLOC_027237	Hk2	6:82725024-82774454	E3KO	EfCtrl	OK	2.70631	5.53193	1.03145	1.61947	0.0067	0.0437064	yes	Hk2	0.405174	3.17448	3.72726	2.94284	6.14479	6.8392
XLOC_003294	XLOC_003294	Hmga2	10:120361274-120476469	E3KO	EfCtrl	OK	77.3854	46.5812	-0.732315	-3.00586	5e-05	0.000724232	yes	Hmga2	55.5106	67.0488	83.6836	38.0626	57.4973	40.6261
XLOC_031113	XLOC_031113	Hmgb2	8:57511842-57515999	E3KO	EfCtrl	OK	3.84025	5.91127	0.622268	1.72766	0.00395	0.0289109	yes	Hmgb2	4.63294	2.97449	2.44641	7.01805	4.73554	5.48136
XLOC_034651	XLOC_034651	Hmgb3	X:71555917-71560676	E3KO	EfCtrl	OK	3.10264	6.10496	0.976485	1.8792	0.00175	0.0150813	yes	Hmgb3	1.33729	3.90082	2.78349	6.42295	4.49026	6.11838
XLOC_032814	XLOC_032814	Hmgcll1	9:75775363-76136350	E3KO	EfCtrl	OK	7.49969	2.40913	-1.63832	-4.12504	5e-05	0.000724232	yes	Hmgcll1	6.09812	6.16327	7.6895	1.76722	3.02768	2.22108
XLOC_005086	XLOC_005086	Hmmr	11:40701394-40733422	E3KO	EfCtrl	OK	4.72773	8.36098	0.822525	2.41045	5e-05	0.000724232	yes	Hmmr	4.31169	3.50444	4.33263	8.77483	7.11501	7.7854
XLOC_031235	XLOC_031235	Hmox1	8:75093590-75100596	E3KO	EfCtrl	OK	574.597	299.422	-0.940369	-4.04696	5e-05	0.000724232	yes	Hmox1	393.735	501.341	552.679	268.869	322.319	233.948
XLOC_011048	XLOC_011048	Hnrnpa1	15:103240431-103244955	E3KO	EfCtrl	OK	77.2415	115.549	0.581062	2.50312	5e-05	0.000724232	yes	Hnrnpa1	60.6863	67.2436	70.0266	111.164	100.195	112.329
XLOC_004407	XLOC_004407	Hoxb7,Hoxb8	11:96281904-96290336	E3KO	EfCtrl	OK	30.9137	12.455	-1.31152	-3.95593	5e-05	0.000724232	yes	Hoxb7,Hoxb8	11.3852	8.55338	8.42005	4.33516	4.16524	4.05145
XLOC_035803	XLOC_035803	Hs6st2	X:51387211-51681856	E3KO	EfCtrl	OK	5.99901	2.54329	-1.23803	-3.3189	5e-05	0.000724232	yes	Hs6st2	7.36985	3.12869	4.48232	1.66691	2.80457	2.29211
XLOC_001911	XLOC_001911	Hsd11b1	1:193203038-193264054	E3KO	EfCtrl	OK	54.0951	21.8079	-1.31065	-4.6087	5e-05	0.000724232	yes	Hsd11b1	43.577	43.2563	52.933	21.4097	20.604	20.0959
XLOC_025477	XLOC_025477	Hspb8	5:116408490-116422864	E3KO	EfCtrl	OK	14.9033	9.0162	-0.725044	-1.6672	0.00345	0.0260091	yes	Hspb8	12.0351	12.3693	13.5607	6.81042	10.4648	7.87644
XLOC_032994	XLOC_032994	Hyal1,Hyal3,Nat6	9:107575819-107587425	E3KO	EfCtrl	OK	10.0121	5.47031	-0.872054	-2.52001	5e-05	0.000724232	yes	Hyal1,Hyal3,Nat6	3.14496	3.17218	3.75172	2.33344	1.94649	2.14466
XLOC_032377	XLOC_032377	Icam1	9:21015959-21039036	E3KO	EfCtrl	OK	27.7184	9.95111	-1.47791	-4.11406	5e-05	0.000724232	yes	Icam1	28.1062	18.8264	21.9364	9.24363	10.3723	7.81865
XLOC_030108	XLOC_030108	Idh2	7:80094845-80115392	E3KO	EfCtrl	OK	14.9094	23.2424	0.640538	2.12995	0.0003	0.00348276	yes	Idh2	13.3183	12.0855	11.4424	25.5712	18.412	20.1644
XLOC_007572	XLOC_007572	Idi1	13:8885500-8892451	E3KO	EfCtrl	OK	7.45455	2.84299	-1.39072	-3.23271	5e-05	0.000724232	yes	Idi1	4.6097	4.07389	8.78449	2.37098	2.27198	2.45055
XLOC_001639	XLOC_001639	Ier5	1:155096366-155099636	E3KO	EfCtrl	OK	45.1134	27.1473	-0.732746	-2.95656	5e-05	0.000724232	yes	Ier5	46.6521	35.1884	33.8774	26.4678	27.0189	23.9217
XLOC_001799	XLOC_001799	Ifi204	1:173747292-173766876	E3KO	EfCtrl	OK	16.2305	11.4581	-0.502339	-1.78153	0.00175	0.0150813	yes	Ifi204	15.7226	14.8825	11.2101	9.42815	14.5326	8.50266
XLOC_030712	XLOC_030712	Ifitm3	7:141009585-141010770	E3KO	EfCtrl	OK	637.662	435.591	-0.549818	-2.34369	5e-05	0.000724232	yes	Ifitm3	584.725	536.418	476.162	422.859	489.826	291.54
XLOC_007019	XLOC_007019	Ifrd1	12:40201566-40248504	E3KO	EfCtrl	OK	52.7177	28.5279	-0.885913	-1.80851	0.00515	0.0356208	yes	Ifrd1	70.7986	29.4906	32.641	23.1015	28.5803	28.079
XLOC_032995	XLOC_032995	Ifrd2	9:107587717-107593038	E3KO	EfCtrl	OK	0.985084	2.118	1.10439	1.61502	0.0077	0.0487696	yes	Ifrd2	0.0677814	0.865708	1.59528	2.04667	1.77177	1.99049
XLOC_027010	XLOC_027010	Igf2bp3	6:49073794-49214954	E3KO	EfCtrl	OK	4.02212	1.65859	-1.278	-2.59209	5e-05	0.000724232	yes	Igf2bp3	3.27076	3.41046	3.81421	1.45453	1.9749	1.32714
XLOC_013527	XLOC_013527	Igf2r	17:12682405-12868143	E3KO	EfCtrl	OK	21.2481	12.3697	-0.780525	-3.1983	5e-05	0.000724232	yes	Igf2r	14.2578	17.5908	21.8169	10.6583	11.9036	11.5477
XLOC_004889	XLOC_004889	Igfbp3	11:7206085-7213923	E3KO	EfCtrl	OK	105.166	53.752	-0.968271	-4.06477	5e-05	0.000724232	yes	Igfbp3	96.9273	70.9293	100.612	42.7106	58.7604	49.7507
XLOC_001281	XLOC_001281	Igfbp5	1:72857931-72874884	E3KO	EfCtrl	OK	3.1498	0.846655	-1.89542	-4.3513	5e-05	0.000724232	yes	Igfbp5	1.93201	3.09616	3.11048	0.516005	1.37657	0.468477
XLOC_019997	XLOC_019997	Igsf3	3:101377124-101463060	E3KO	EfCtrl	OK	3.84722	6.3227	0.716724	2.43721	0.0001	0.00134402	yes	Igsf3	1.52818	3.96861	4.3838	5.55936	5.74307	6.1967
XLOC_014555	XLOC_014555	Iigp1	18:60376028-60392627	E3KO	EfCtrl	OK	6.54317	3.86695	-0.758794	-2.26617	0.0001	0.00134402	yes	Iigp1	4.85159	5.5159	7.06403	3.48518	5.12037	2.68391
XLOC_034390	XLOC_034390	Il13ra1	X:36112109-36171259	E3KO	EfCtrl	OK	9.24229	6.4178	-0.526172	-1.80985	0.0019	0.0161162	yes	Il13ra1	8.87467	7.47546	8.10199	6.05076	6.77215	5.93328
XLOC_016150	XLOC_016150	Il15ra	2:11705286-11733986	E3KO	EfCtrl	OK	2.8293	5.31323	0.909146	1.55464	0.0021	0.0174552	yes	Il15ra	2.08097	3.16021	2.01387	5.44454	4.52655	4.91832
XLOC_031992	XLOC_031992	Il27ra	8:84021470-84042575	E3KO	EfCtrl	OK	1.75598	3.16726	0.850961	1.832	0.0028	0.0219934	yes	Il27ra	1.03131	1.43468	1.94248	3.68549	2.08352	2.9875
XLOC_028871	XLOC_028871	Il4ra	7:125552281-125579472	E3KO	EfCtrl	OK	8.4731	4.93205	-0.780703	-2.68245	5e-05	0.000724232	yes	Il4ra	5.89236	7.04726	8.32019	4.39631	5.07675	4.07544
XLOC_011076	XLOC_011076	Il7r	15:9506160-9529876	E3KO	EfCtrl	OK	3.16493	0.91105	-1.79657	-3.62721	5e-05	0.000724232	yes	Il7r	5.26312	0.879389	1.91179	0.603492	1.39562	0.624092
XLOC_007600	XLOC_007600	Inhba	13:16011850-16027211	E3KO	EfCtrl	OK	25.1557	7.58149	-1.73033	-5.22735	5e-05	0.000724232	yes	Inhba	19.2765	21.8778	21.4905	5.83878	9.22779	5.57442
XLOC_000433	XLOC_000433	Inpp5d	1:87620311-87720507	E3KO	EfCtrl	OK	31.1456	20.2118	-0.623825	-1.78517	0.0021	0.0174552	yes	Inpp5d	22.7525	30.2693	25.7829	18.8887	20.2101	16.7768
XLOC_024002	XLOC_024002	Insig1	5:28071362-28078662	E3KO	EfCtrl	OK	41.3062	25.9614	-0.669991	-2.65894	5e-05	0.000724232	yes	Insig1	30.6818	35.3405	41.9827	22.9851	24.9381	26.4152
XLOC_019777	XLOC_019777	Iqgap3	3:88082050-88121048	E3KO	EfCtrl	OK	1.00446	2.54471	1.34108	3.22679	5e-05	0.000724232	yes	Iqgap3	0.900833	0.886722	0.711353	2.61964	2.09733	2.26469
XLOC_008629	XLOC_008629	Isca1	13:59755408-59769810	E3KO	EfCtrl	OK	9.4381	6.21289	-0.603232	-1.58135	0.00505	0.0350694	yes	Isca1	13.7091	4.69013	5.19353	5.89971	5.91666	5.62788
XLOC_006403	XLOC_006403	Ispd	12:36381241-36689444	E3KO	EfCtrl	OK	1.47571	2.73152	0.888294	1.78913	0.0031	0.0238603	yes	Ispd	0.679948	1.82001	1.3914	2.69928	2.24684	2.8424
XLOC_008901	XLOC_008901	Itga1	13:114958078-115101964	E3KO	EfCtrl	OK	7.46743	5.05835	-0.561944	-1.8139	0.00085	0.0083291	yes	Itga1	7.31313	5.41692	6.59312	4.8898	4.21575	5.3511
XLOC_008900	XLOC_008900	Itga2	13:114835915-114932041	E3KO	EfCtrl	OK	4.20457	1.95308	-1.10621	-3.03392	5e-05	0.000724232	yes	Itga2	2.42724	3.08859	5.3972	1.61341	1.9028	2.00804
XLOC_028924	XLOC_028924	Itgam	7:128062639-128128160	E3KO	EfCtrl	OK	2.2063	0.946766	-1.22055	-1.77521	0.00075	0.007507	yes	Itgam	1.98428	1.66366	1.9612	0.900917	1.29526	0.458226
XLOC_002272	XLOC_002272	Itgb2	10:77530251-77565708	E3KO	EfCtrl	OK	8.50606	5.74381	-0.566483	-1.65439	0.00305	0.0235647	yes	Itgb2	8.02595	5.57513	7.58399	5.31147	6.52803	4.14121
XLOC_011883	XLOC_011883	Itgb5	16:33829664-33949153	E3KO	EfCtrl	OK	3.7951	1.78392	-1.08908	-1.78571	0.0022	0.0181411	yes	Itgb5	1.27988	4.46085	3.90381	0.878793	1.9564	1.92475
XLOC_016021	XLOC_016021	Itih5	2:10153570-10256529	E3KO	EfCtrl	OK	4.44058	7.62939	0.780819	2.93177	5e-05	0.000724232	yes	Itih5	3.43028	4.23222	3.841	6.49968	6.54685	8.55694
XLOC_000895	XLOC_000895	Itpkb	1:180326969-180424802	E3KO	EfCtrl	OK	9.05827	13.829	0.610387	2.34846	0.0001	0.00134402	yes	Itpkb	4.11322	9.79892	9.24007	13.2549	12.1526	12.8549
XLOC_030524	XLOC_030524	Itpripl2	7:118485113-118491975	E3KO	EfCtrl	OK	121.498	77.2437	-0.65344	-2.84657	5e-05	0.000724232	yes	Itpripl2	108.589	97.5564	109.385	65.8014	78.2672	77.0759
XLOC_012070	XLOC_012070	Jam2	16:84774122-84825928	E3KO	EfCtrl	OK	3.36611	1.08511	-1.63324	-1.85749	0.0026	0.0206827	yes	Jam2	3.52133	0.945368	4.26424	0.416516	1.22896	1.43215
XLOC_031186	XLOC_031186	Jund	8:70697738-70700616	E3KO	EfCtrl	OK	10.7053	16.2816	0.604919	1.96004	0.00075	0.007507	yes	Jund	7.2865	10.7384	9.07797	12.8361	15.2808	16.5448
XLOC_030869	XLOC_030869	Kbtbd11	8:15011024-15033330	E3KO	EfCtrl	OK	10.8062	19.6345	0.861526	3.44666	5e-05	0.000724232	yes	Kbtbd11	10.4625	9.3748	7.58182	19.449	16.1125	19.395
XLOC_032275	XLOC_032275	Kbtbd3	9:4309742-4331721	E3KO	EfCtrl	OK	0.901264	1.77646	0.978981	1.66469	0.0058	0.0390723	yes	Kbtbd3	0.162612	0.714102	1.55503	1.43636	2.09373	1.6398
XLOC_036583	XLOC_036583	Kctd12b	X:153685153-153696391	E3KO	EfCtrl	OK	62.9038	41.2248	-0.609635	-2.66675	5e-05	0.000724232	yes	Kctd12b	49.3077	55.3288	65.0549	44.1193	37.8418	40.1689
XLOC_000097	XLOC_000097	Khdrbs2	1:32172805-32657738	E3KO	EfCtrl	OK	2.05851	7.10985	1.78822	3.52139	5e-05	0.000724232	yes	Khdrbs2	0.917339	2.39892	1.97537	4.7544	7.33347	7.5261
XLOC_015352	XLOC_015352	Kif11	19:37376402-37421859	E3KO	EfCtrl	OK	5.05078	10.223	1.01724	3.63421	5e-05	0.000724232	yes	Kif11	5.15491	3.7713	4.12327	11.6768	7.56455	9.97837
XLOC_033149	XLOC_033149	Kif15	9:122951080-123018725	E3KO	EfCtrl	OK	1.12524	3.01865	1.42368	3.7427	5e-05	0.000724232	yes	Kif15	0.547195	1.1541	1.22314	3.10379	2.61758	2.80125
XLOC_001403	XLOC_001403	Kif1a	1:93015455-93101865	E3KO	EfCtrl	OK	2.40014	1.54226	-0.638071	-1.82179	0.00145	0.0129287	yes	Kif1a	0.549287	2.32027	3.24911	1.25919	1.71176	1.26562
XLOC_014396	XLOC_014396	Kif20a	18:34624623-34651735	E3KO	EfCtrl	OK	8.99496	14.6747	0.706145	1.61612	0.00675	0.0439656	yes	Kif20a	8.6307	7.03938	7.14977	15.0414	12.8477	13.2639
XLOC_015341	XLOC_015341	Kif20b	19:34922357-34975731	E3KO	EfCtrl	OK	3.20284	5.4138	0.757287	2.62323	5e-05	0.000724232	yes	Kif20b	3.11476	2.43743	2.70586	5.18622	5.34061	4.85318
XLOC_030602	XLOC_030602	Kif22	7:127027731-127042420	E3KO	EfCtrl	OK	4.77393	12.4311	1.3807	3.90648	5e-05	0.000724232	yes	Kif22	2.1882	5.13596	4.87043	13.6724	9.72658	11.125
XLOC_023318	XLOC_023318	Kif2c	4:117159638-117182639	E3KO	EfCtrl	OK	3.23239	9.4705	1.55084	4.15688	5e-05	0.000724232	yes	Kif2c	2.27057	3.4552	2.51751	10.4419	7.17624	8.67943
XLOC_006355	XLOC_006355	Klf11	12:24651370-24662774	E3KO	EfCtrl	OK	4.67162	7.9686	0.770404	2.39457	5e-05	0.000724232	yes	Klf11	3.69482	4.61311	3.76873	7.62107	6.91975	8.10855
XLOC_031223	XLOC_031223	Klf2	8:72319032-72321656	E3KO	EfCtrl	OK	12.809	23.0317	0.846456	2.46785	5e-05	0.000724232	yes	Klf2	5.47673	14.0167	13.7245	20.2276	20.2804	23.7963
XLOC_031897	XLOC_031897	Klhl26	8:70450227-70476943	E3KO	EfCtrl	OK	12.1616	7.06445	-0.783686	-2.45765	5e-05	0.000724232	yes	Klhl26	10.216	10.3272	9.77627	6.32072	7.20815	5.81256
XLOC_012305	XLOC_012305	Klhl6	16:19946498-19983037	E3KO	EfCtrl	OK	46.8226	23.4651	-0.996687	-2.18922	0.0003	0.00348276	yes	Klhl6	46.4003	33.9496	37.3435	19.8266	21.6594	23.68
XLOC_027590	XLOC_027590	Klra4	6:130043730-130067271	E3KO	EfCtrl	OK	7.46163	2.47337	-1.59301	-3.24253	5e-05	0.000724232	yes	Klra4	5.82839	6.63433	7.15079	2.26414	2.9969	1.85744
XLOC_005606	XLOC_005606	Ksr1	11:79013439-79146407	E3KO	EfCtrl	OK	1.84573	2.93949	0.671376	1.66866	0.00325	0.0247798	yes	Ksr1	1.26565	1.7815	1.47695	3.21707	2.38331	2.31066
XLOC_011534	XLOC_011534	Lalba	15:98480399-98482683	E3KO	EfCtrl	OK	4.41637	0.813056	-2.44143	-2.72655	0.0003	0.00348276	yes	Lalba	1.58522	4.9157	4.83804	0.592928	0.501033	1.13517
XLOC_001533	XLOC_001533	Lax1	1:133679028-133690108	E3KO	EfCtrl	OK	5.44976	3.06045	-0.832447	-2.07952	0.00025	0.00297984	yes	Lax1	7.27574	3.70519	2.54214	2.69122	2.30699	3.46738
XLOC_009652	XLOC_009652	Lcp1	14:75131100-75230842	E3KO	EfCtrl	OK	65.3241	34.8072	-0.908232	-2.97417	5e-05	0.000724232	yes	Lcp1	53.1509	56.859	84.2355	34.9702	41.9577	34.1078
XLOC_027678	XLOC_027678	Ldhb	6:142490248-142507957	E3KO	EfCtrl	OK	21.6271	9.29845	-1.21778	-3.52635	5e-05	0.000724232	yes	Ldhb	16.3185	15.4723	21.9199	8.22462	11.0063	6.17203
XLOC_012348	XLOC_012348	Leprel1	16:25956474-26105784	E3KO	EfCtrl	OK	4.14551	2.01375	-1.04167	-1.86947	0.0007	0.00709513	yes	Leprel1	3.85443	4.17199	3.02049	1.37191	2.08147	2.50114
XLOC_024768	XLOC_024768	Lfng	5:140607340-140615543	E3KO	EfCtrl	OK	3.06102	5.35219	0.806116	1.79226	0.00215	0.0177943	yes	Lfng	3.61237	1.7203	2.17194	6.4234	3.19751	5.16283
XLOC_009255	XLOC_009255	Lgals3	14:47367750-47386160	E3KO	EfCtrl	OK	103.491	52.9223	-0.967553	-3.58576	5e-05	0.000724232	yes	Lgals3	90.4232	78.4482	92.3778	42.7991	62.1271	42.2133
XLOC_012326	XLOC_012326	Liph	16:21953825-21995542	E3KO	EfCtrl	OK	2.44329	0.993641	-1.29803	-2.76846	5e-05	0.000724232	yes	Liph	2.73866	1.41806	2.01929	0.810653	1.00766	0.969581
XLOC_014538	XLOC_014538	Lmnb1	18:56707812-56753424	E3KO	EfCtrl	OK	10.5518	15.5036	0.555113	1.88822	0.0017	0.0147224	yes	Lmnb1	11.4804	7.33714	7.44193	15.1973	12.9706	14.8472
XLOC_015865	XLOC_015865	Loxl4	19:42593981-42612813	E3KO	EfCtrl	OK	24.4984	16.4596	-0.573762	-2.26474	0.00015	0.00192134	yes	Loxl4	19.801	20.5324	21.09	14.8632	15.1174	14.9223
XLOC_009645	XLOC_009645	Lpar6	14:73123036-73325822	E3KO	EfCtrl	OK	107.821	48.8051	-1.14353	-3.60699	5e-05	0.000724232	yes	Lpar6	88.5068	92.0668	108.13	44.3528	51.6252	47.7851
XLOC_006932	XLOC_006932	Lpin1	12:16535668-16589770	E3KO	EfCtrl	OK	11.6873	7.01255	-0.736924	-2.77322	5e-05	0.000724232	yes	Lpin1	9.62797	9.40121	10.7104	6.62017	6.75338	6.2662
XLOC_036516	XLOC_036516	Lrch2	X:147470374-147554081	E3KO	EfCtrl	OK	7.42049	11.7994	0.669128	1.80945	0.00145	0.0129287	yes	Lrch2	4.76913	8.01621	6.60987	11.726	9.52742	12.2497
XLOC_029559	XLOC_029559	Lrfn3	7:30355513-30362772	E3KO	EfCtrl	OK	1.28216	2.37218	0.887634	1.60247	0.00705	0.0454691	yes	Lrfn3	0.232586	1.57294	1.48978	1.92754	1.91432	2.63533
XLOC_018389	XLOC_018389	Lrrc55	2:85160777-85196699	E3KO	EfCtrl	OK	4.3794	1.45718	-1.58756	-3.52335	5e-05	0.000724232	yes	Lrrc55	1.92061	4.48477	5.17744	1.09106	1.53606	1.55676
XLOC_013410	XLOC_013410	Ltbp1	17:75005567-75392512	E3KO	EfCtrl	OK	4.48648	9.59416	1.09657	2.73881	5e-05	0.000724232	yes	Ltbp1	3.45165	4.66222	4.09023	10.5438	7.09483	9.6487
XLOC_029503	XLOC_029503	Ltbp4	7:27305135-27337692	E3KO	EfCtrl	OK	1.33853	5.61032	2.06744	1.86702	0.0014	0.0125573	yes	Ltbp4	0.601238	1.65083	1.18125	6.0995	3.22295	6.15317
XLOC_001873	XLOC_001873	Lyplal1	1:186087730-186117310	E3KO	EfCtrl	OK	2.46479	5.07735	1.04261	2.06725	0.00115	0.0106752	yes	Lyplal1	0.0923861	3.3646	3.14463	4.26903	5.77009	4.45663
XLOC_032812	XLOC_032812	Lysmd2	9:75625731-75637773	E3KO	EfCtrl	OK	12.8755	22.9648	0.834793	2.39448	0.0002	0.00245954	yes	Lysmd2	9.10937	12.4008	11.6693	21.4853	23.0321	20.2153
XLOC_003271	XLOC_003271	Lyz2	10:117277333-117282274	E3KO	EfCtrl	OK	219.823	150.642	-0.545221	-2.31527	5e-05	0.000724232	yes	Lyz2	132.877	211.698	221.459	123.431	190.695	107.496
XLOC_036138	XLOC_036138	Maged1	X:94535473-94542143	E3KO	EfCtrl	OK	257.109	170.213	-0.59504	-2.57326	5e-05	0.000724232	yes	Maged1	192.001	220.755	232.176	157.879	161.581	148.977
XLOC_036578	XLOC_036578	Mageh1	X:153036165-153037563	E3KO	EfCtrl	OK	20.336	13.7784	-0.561623	-1.73042	0.0024	0.0194009	yes	Mageh1	17.2856	18.3022	16.8042	11.068	13.8249	14.1047
XLOC_031741	XLOC_031741	Mak16	8:31150315-31168724	E3KO	EfCtrl	OK	63.7187	43.4434	-0.552577	-2.19364	0.0001	0.00134402	yes	Mak16	58.6854	52.0712	51.8118	38.1454	44.2618	40.0717
XLOC_015571	XLOC_015571	Malat1	19:5795689-5802672	E3KO	EfCtrl	OK	167.104	68.0517	-1.29604	-2.26088	5e-05	0.000724232	yes	Malat1	259.991	65.424	100.742	63.1996	73.8494	60.8313
XLOC_018896	XLOC_018896	Mall	2:127704385-127729932	E3KO	EfCtrl	OK	23.5581	42.6713	0.857044	3.23656	5e-05	0.000724232	yes	Mall	14.8143	23.5508	22.541	43.7736	35.8789	41.2861
XLOC_020423	XLOC_020423	Maml3	3:51687610-52104891	E3KO	EfCtrl	OK	3.28482	1.93449	-0.763863	-2.0772	0.0002	0.00245954	yes	Maml3	3.0304	2.14159	2.64599	1.64108	1.83284	1.78665
XLOC_013367	XLOC_013367	Man2a1	17:64600735-64755110	E3KO	EfCtrl	OK	56.8767	40.0461	-0.506179	-2.1856	0.0001	0.00134402	yes	Man2a1	38.6324	51.2257	58.4206	34.9606	41.4734	38.5778
XLOC_027634	XLOC_027634	Mansc1	6:134609209-134632488	E3KO	EfCtrl	OK	15.0606	22.0704	0.551333	1.97468	0.00085	0.0083291	yes	Mansc1	10.8582	14.1954	13.932	23.2376	17.8279	21.7755
XLOC_034296	XLOC_034296	Maoa	X:16619697-16687818	E3KO	EfCtrl	OK	62.1451	28.7525	-1.11195	-4.76952	5e-05	0.000724232	yes	Maoa	53.3805	56.9254	55.4713	28.2412	27.9364	28.1432
XLOC_012745	XLOC_012745	Map3k4	17:12227620-12318660	E3KO	EfCtrl	OK	4.34008	8.42651	0.957213	2.28384	0.00065	0.00667132	yes	Map3k4	0.921934	3.52289	2.6578	4.45326	4.04738	5.78391
XLOC_003737	XLOC_003737	Mapk9	11:49846750-49886421	E3KO	EfCtrl	OK	32.068	47.8051	0.576033	1.6737	0.00375	0.027755	yes	Mapk9	27.5736	35.0784	20.661	45.4978	42.6819	47.8955
XLOC_014348	XLOC_014348	Mapre2	18:23752332-23893861	E3KO	EfCtrl	OK	15.4578	21.9211	0.503987	1.57766	0.00615	0.040851	yes	Mapre2	12.6741	13.3679	13.8687	20.5247	20.5699	21.0388
XLOC_022101	XLOC_022101	Marcksl1	4:129513580-129515985	E3KO	EfCtrl	OK	395.654	260.476	-0.603086	-2.64365	5e-05	0.000724232	yes	Marcksl1	341.676	307.094	340.63	227.902	251.226	236.825
XLOC_029076	XLOC_029076	Mboat7	7:3677789-3701023	E3KO	EfCtrl	OK	17.5654	10.1996	-0.784229	-1.98088	0.00145	0.0129287	yes	Mboat7	18.6226	17.2848	20.6419	10.5781	12.0659	14.4364
XLOC_028417	XLOC_028417	Mcee	7:64392644-64412121	E3KO	EfCtrl	OK	37.5808	22.5177	-0.738938	-2.21571	0.0001	0.00134402	yes	Mcee	43.6648	29.1164	21.5478	22.8629	20.2455	19.3587
XLOC_001044	XLOC_001044	Mcm3	1:20802973-20820278	E3KO	EfCtrl	OK	11.6059	16.5833	0.514872	1.85823	0.00125	0.0114398	yes	Mcm3	7.94722	9.66249	11.5267	17.4821	13.3028	14.8183
XLOC_031236	XLOC_031236	Mcm5	8:75109527-75128439	E3KO	EfCtrl	OK	2.80145	5.68304	1.02049	2.79691	5e-05	0.000724232	yes	Mcm5	1.60247	2.79818	2.75114	6.58103	4.56431	4.6607
XLOC_003275	XLOC_003275	Mdm2	10:117688887-117710758	E3KO	EfCtrl	OK	165.56	77.7882	-1.08973	-4.10898	5e-05	0.000724232	yes	Mdm2	128.536	131.771	185.743	72.0389	88.9859	67.7644
XLOC_030058	XLOC_030058	Mef2a	7:67231162-67372858	E3KO	EfCtrl	OK	66.5757	45.1908	-0.558965	-1.75955	0.00365	0.0271648	yes	Mef2a	52.419	61.7035	64.8895	42.8059	47.5039	48.9063
XLOC_021394	XLOC_021394	Melk	4:44300875-44364675	E3KO	EfCtrl	OK	2.52736	3.87668	0.617191	1.47632	0.0065	0.0426884	yes	Melk	3.58487	1.20271	1.55264	4.08889	3.06188	3.8147
XLOC_025902	XLOC_025902	Mest	6:30723546-30896794	E3KO	EfCtrl	OK	853.456	267.857	-1.67185	-4.11697	5e-05	0.000724232	yes	Mest	695.664	563.87	693.933	220.009	232.096	194.829
XLOC_001683	XLOC_001683	Mettl13	1:162532126-162548551	E3KO	EfCtrl	OK	2.61	4.54173	0.799189	1.84368	0.0015	0.0132916	yes	Mettl13	0.470172	2.86745	3.34795	5.04375	3.36763	4.10088
XLOC_028499	XLOC_028499	Mex3b	7:82867332-82871563	E3KO	EfCtrl	OK	1.42496	2.8022	0.97564	1.98895	0.0013	0.0118058	yes	Mex3b	0.515112	1.75207	1.52541	2.37472	2.89078	2.79144
XLOC_026364	XLOC_026364	Mgll	6:88716423-88828360	E3KO	EfCtrl	OK	26.831	51.3046	0.935187	3.80685	5e-05	0.000724232	yes	Mgll	21.0891	23.9935	22.2297	56.2909	39.4732	47.1815
XLOC_033246	XLOC_033246	Mir1900,mmu-mir-1900	9:21015959-21039036	E3KO	EfCtrl	OK	13.4741	4.51417	-1.57766	-3.12857	5e-05	0.000724232	yes	Mir1900,mmu-mir-1900	5.8274	4.90376	6.47645	1.78821	2.31602	2.23034
XLOC_024811	XLOC_024811	Mir5105	5:146231229-146302874	E3KO	EfCtrl	OK	1860000	137250	-3.7628	-3.57383	5e-05	0.000724232	yes	Mir5105	4097180	180247	154202	173289	68101	138666
XLOC_024903	XLOC_024903	Mir5109	5:17776748-17776835	E3KO	EfCtrl	OK	58302.1	8110.88	-2.84562	-3.35718	5e-05	0.000724232	yes	Mir5109	129180	5246.14	4454.35	7325.65	7100.4	7973.46
XLOC_030676	XLOC_030676	Mki67	7:135689787-135716379	E3KO	EfCtrl	OK	4.26997	9.06138	1.08551	4.38397	5e-05	0.000724232	yes	Mki67	2.92141	3.6943	4.28657	9.09696	7.22466	8.95965
XLOC_014700	XLOC_014700	Mkx	18:6910458-7004726	E3KO	EfCtrl	OK	2.76876	0.328206	-3.07657	-2.78978	5e-05	0.000724232	yes	Mkx	5.38238	0.323859	1.00739	0.265561	0.255764	0.426526
XLOC_004351	XLOC_004351	Mmd	11:90187683-90278589	E3KO	EfCtrl	OK	123.073	62.4357	-0.979065	-4.18497	5e-05	0.000724232	yes	Mmd	105.995	103.171	116.802	53.247	65.2035	63.5846
XLOC_005652	XLOC_005652	Mmp28	11:83437685-83463071	E3KO	EfCtrl	OK	13.4893	5.0689	-1.41208	-4.32511	5e-05	0.000724232	yes	Mmp28	15.8581	11.6603	12.3501	5.00227	5.38257	5.45078
XLOC_020557	XLOC_020557	Mnd1	3:84087933-84155786	E3KO	EfCtrl	OK	4.31886	1.5114	-1.51477	-2.11429	0.00035	0.00396199	yes	Mnd1	9.09088	0.359562	0.785349	1.09442	1.64015	1.45517
XLOC_014357	XLOC_014357	Mocos	18:24653690-24701556	E3KO	EfCtrl	OK	11.7288	7.63222	-0.619877	-2.02331	0.0004	0.00443257	yes	Mocos	7.18691	10.7958	11.8424	7.62811	7.59394	5.9745
XLOC_036463	XLOC_036463	Morc4	X:139821631-139871677	E3KO	EfCtrl	OK	41.6196	27.5802	-0.593631	-1.63325	0.001	0.00952306	yes	Morc4	34.2345	38.9136	36.9	24.4971	24.63	28.8496
XLOC_023016	XLOC_023016	Mpdz	4:81278499-81442815	E3KO	EfCtrl	OK	16.664	26.1349	0.649244	1.47039	0.0043	0.0309138	yes	Mpdz	15.2384	27.7233	25.0947	39.6027	31.5885	34.2936
XLOC_036010	XLOC_036010	Mpp1	X:75095853-75131016	E3KO	EfCtrl	OK	532.652	254.984	-1.06279	-3.7219	5e-05	0.000724232	yes	Mpp1	470.521	434.527	445.299	230.384	242.331	236.176
XLOC_016159	XLOC_016159	Mrc1	2:14229413-14332057	E3KO	EfCtrl	OK	8.00262	5.29045	-0.597081	-2.11239	0.00015	0.00192134	yes	Mrc1	3.14116	6.82831	10.814	5.25947	4.3232	5.34368
XLOC_001277	XLOC_001277	Mreg	1:72159232-72212307	E3KO	EfCtrl	OK	2.35517	0.951355	-1.30778	-2.29201	0.0002	0.00245954	yes	Mreg	1.35677	2.50396	2.36323	0.711186	1.21493	0.812569
XLOC_031200	XLOC_031200	Mrpl34	8:71464925-71465752	E3KO	EfCtrl	OK	33.4411	14.0973	-1.2462	-2.69159	5e-05	0.000724232	yes	Mrpl34	54.3642	12.0494	12.1283	11.4323	14.0023	12.8042
XLOC_015675	XLOC_015675	Ms4a6d	19:11586603-11604849	E3KO	EfCtrl	OK	17.101	8.34627	-1.03487	-2.28095	0.0007	0.00709513	yes	Ms4a6d	13.7946	15.0641	15.6243	6.63004	9.04569	8.10841
XLOC_000295	XLOC_000295	Mtap2	1:66175272-66442583	E3KO	EfCtrl	OK	5.22749	0.356945	-3.87235	-2.25433	5e-05	0.000724232	yes	Mtap2	12.8947	0.0375554	0.0886144	0.0727285	0.872286	0.056477
XLOC_010617	XLOC_010617	Mtdh	15:34082693-34142386	E3KO	EfCtrl	OK	116.414	66.3692	-0.810684	-1.89293	0.00335	0.0254018	yes	Mtdh	138.298	78.7418	76.2616	55.3642	65.2636	61.1096
XLOC_031486	XLOC_031486	Mtss1l	8:110721475-110741400	E3KO	EfCtrl	OK	3.4726	6.3204	0.864001	2.54599	5e-05	0.000724232	yes	Mtss1l	1.90266	4.62622	2.76724	6.19817	5.18277	5.9525
XLOC_021013	XLOC_021013	Mttp	3:138089854-138143388	E3KO	EfCtrl	OK	2.49745	1.21072	-1.04459	-2.45756	5e-05	0.000724232	yes	Mttp	1.48885	2.09776	2.86161	1.00553	1.45354	0.951541
XLOC_035184	XLOC_035184	Mum1l1	X:139210041-139238335	E3KO	EfCtrl	OK	4.41851	2.06337	-1.09856	-2.36885	5e-05	0.000724232	yes	Mum1l1	4.2805	2.64688	4.54908	1.97358	1.85567	2.16844
XLOC_022499	XLOC_022499	Mxra8	4:155839491-155844088	E3KO	EfCtrl	OK	319.901	175.464	-0.866451	-2.32242	5e-05	0.000724232	yes	Mxra8	265.105	295.094	272.595	183.699	159.329	157.679
XLOC_004279	XLOC_004279	Myo19	11:84876314-84916366	E3KO	EfCtrl	OK	9.41727	3.50115	-1.42748	-2.3793	0.0001	0.00134402	yes	Myo19	11.749	5.16211	6.59995	3.66805	3.0769	3.03562
XLOC_010438	XLOC_010438	Naa16	14:79334203-79390778	E3KO	EfCtrl	OK	12.8954	7.4694	-0.787792	-2.27208	5e-05	0.000724232	yes	Naa16	14.1783	9.06045	10.483	5.88196	8.79067	6.89095
XLOC_008835	XLOC_008835	Naip2	13:100144062-100202092	E3KO	EfCtrl	OK	5.84534	2.8754	-1.02352	-3.25108	5e-05	0.000724232	yes	Naip2	4.54592	4.88273	5.55563	2.33272	2.84434	2.89241
XLOC_024917	XLOC_024917	Napepld	5:21662900-21701396	E3KO	EfCtrl	OK	1.7884	3.49123	0.965066	2.40157	5e-05	0.000724232	yes	Napepld	0.940732	2.11054	1.67789	3.58229	2.97525	3.50387
XLOC_027526	XLOC_027526	Ncapd2	6:125168008-125191595	E3KO	EfCtrl	OK	5.81655	11.9797	1.04235	3.64338	5e-05	0.000724232	yes	Ncapd2	3.60364	5.28722	5.76975	13.1415	9.71384	10.1642
XLOC_006879	XLOC_006879	Ncapg2	12:116405401-116463531	E3KO	EfCtrl	OK	2.64922	3.9425	0.573544	1.84979	0.00165	0.0143734	yes	Ncapg2	2.70259	1.68652	2.4844	4.28662	3.38687	3.63964
XLOC_009130	XLOC_009130	Ncoa4	14:32159864-32179855	E3KO	EfCtrl	OK	12.8479	6.87031	-0.90309	-1.97214	0.00055	0.00580945	yes	Ncoa4	16.1637	7.60051	8.40945	8.39596	5.04147	5.93373
XLOC_016360	XLOC_016360	Ncs1	2:31245822-31295989	E3KO	EfCtrl	OK	5.20829	8.53985	0.713401	1.81567	0.00085	0.0083291	yes	Ncs1	1.9445	7.16242	4.43125	7.54239	8.77121	7.61569
XLOC_014174	XLOC_014174	Ndc80	17:71496099-71526857	E3KO	EfCtrl	OK	6.34016	9.74785	0.620565	1.90878	0.00065	0.00667132	yes	Ndc80	7.7346	4.27739	3.88197	10.0466	8.21771	8.90726
XLOC_012440	XLOC_012440	Ndufb4	16:37647169-37654453	E3KO	EfCtrl	OK	5.2502	9.77472	0.896684	1.87752	0.0016	0.0140202	yes	Ndufb4	1.77449	7.39796	4.71693	9.43606	9.74466	8.62775
XLOC_031826	XLOC_031826	Neil3	8:53586866-53639065	E3KO	EfCtrl	OK	1.539	4.54991	1.56384	2.88917	5e-05	0.000724232	yes	Neil3	1.45556	1.28893	1.14242	5.17914	3.47232	4.19438
XLOC_000952	XLOC_000952	Nek2	1:191821443-191833050	E3KO	EfCtrl	OK	4.44465	8.21999	0.887066	2.59517	5e-05	0.000724232	yes	Nek2	4.84184	2.81351	3.38254	8.67895	6.02641	8.07885
XLOC_031693	XLOC_031693	Nek3	8:22128282-22166435	E3KO	EfCtrl	OK	1.89358	3.72626	0.976611	1.75652	0.00165	0.0143734	yes	Nek3	0.0730439	2.59185	2.28902	3.92938	3.33277	3.12309
XLOC_019775	XLOC_019775	Nes	3:87971077-87980451	E3KO	EfCtrl	OK	6.49305	12.1324	0.901892	3.40651	5e-05	0.000724232	yes	Nes	3.63795	7.86782	4.87097	10.2406	12.2132	10.4429
XLOC_001100	XLOC_001100	Neurl3	1:36264601-36273425	E3KO	EfCtrl	OK	18.5979	11.8722	-0.647547	-2.25601	0.00015	0.00192134	yes	Neurl3	15.3425	14.0957	17.6574	10.9926	12.511	9.5114
XLOC_015014	XLOC_015014	Nfatc1	18:80606204-80713071	E3KO	EfCtrl	OK	40.7531	64.9119	0.671572	2.90697	5e-05	0.000724232	yes	Nfatc1	30.6388	38.9687	34.8813	62.0194	54.9069	65.6296
XLOC_032010	XLOC_032010	Nfix	8:84699875-84800344	E3KO	EfCtrl	OK	4.29298	6.41623	0.579745	1.45327	0.00565	0.0382737	yes	Nfix	4.09351	3.30101	3.79713	5.91925	6.55966	7.86989
XLOC_012506	XLOC_012506	Nfkbiz	16:55811374-55838899	E3KO	EfCtrl	OK	8.43068	5.65151	-0.577013	-1.79947	0.0024	0.0194009	yes	Nfkbiz	8.88725	5.96347	6.68217	4.74407	6.46843	4.77202
XLOC_007589	XLOC_007589	Nid1	13:13437601-13512275	E3KO	EfCtrl	OK	228.863	136.112	-0.749696	-3.17772	5e-05	0.000724232	yes	Nid1	141.958	191.865	256.612	125.794	126.652	131.486
XLOC_024214	XLOC_024214	Nipal1	5:72647795-72671078	E3KO	EfCtrl	OK	4.03854	1.48633	-1.44208	-3.64677	5e-05	0.000724232	yes	Nipal1	2.80927	3.69998	4.24797	1.57762	1.2591	1.50112
XLOC_008858	XLOC_008858	Nln	13:104023438-104109614	E3KO	EfCtrl	OK	8.74683	12.8138	0.550869	1.99231	0.0009	0.00873141	yes	Nln	5.55747	9.90883	7.38966	12.5721	11.5335	12.364
XLOC_012163	XLOC_012163	Nlrc3	16:3945006-3976632	E3KO	EfCtrl	OK	1.86329	3.51847	0.917096	2.35743	0.00015	0.00192134	yes	Nlrc3	1.34504	1.93128	1.58476	4.16237	2.82503	3.25845
XLOC_000713	XLOC_000713	Nmnat2	1:152955100-153119260	E3KO	EfCtrl	OK	4.03423	0.68566	-2.55673	-5.49298	5e-05	0.000724232	yes	Nmnat2	3.00323	2.84453	4.43575	0.771511	0.651873	0.506395
XLOC_033461	XLOC_033461	Nnmt	9:48591876-48605153	E3KO	EfCtrl	OK	39.1676	20.2426	-0.952268	-2.12567	0.00055	0.00580945	yes	Nnmt	53.9976	22.1356	20.1348	17.1456	21.489	17.0605
XLOC_019973	XLOC_019973	Notch2	3:98013537-98150367	E3KO	EfCtrl	OK	8.86538	14.7068	0.730228	3.00715	5e-05	0.000724232	yes	Notch2	4.72526	9.29755	8.56303	12.7701	12.184	15.5507
XLOC_013072	XLOC_013072	Notch4	17:34564267-34588503	E3KO	EfCtrl	OK	64.6362	43.4477	-0.573065	-1.88615	0.00095	0.00913113	yes	Notch4	9.15965	11.1792	11.4862	8.25544	9.55751	8.02814
XLOC_020644	XLOC_020644	Npr1	3:90450590-90465866	E3KO	EfCtrl	OK	75.5763	38.9462	-0.95645	-2.88469	5e-05	0.000724232	yes	Npr1	54.2075	66.5513	72.9222	36.0293	41.8837	30.606
XLOC_006200	XLOC_006200	Nptx1	11:119538718-119547753	E3KO	EfCtrl	OK	6.63436	2.41487	-1.45801	-4.24172	5e-05	0.000724232	yes	Nptx1	2.90907	5.72711	8.35817	2.0527	3.20085	1.45005
XLOC_026104	XLOC_026104	Npy	6:49822709-49829507	E3KO	EfCtrl	OK	14.6587	32.6896	1.15707	2.62377	5e-05	0.000724232	yes	Npy	0.345087	20.1594	18.0353	42.1023	22.7322	26.629
XLOC_031746	XLOC_031746	Nrg1	8:31818027-31918203	E3KO	EfCtrl	OK	4.81174	1.34629	-1.83757	-3.56346	5e-05	0.000724232	yes	Nrg1	4.07362	4.43341	3.75197	1.25303	1.2449	1.26821
XLOC_015124	XLOC_015124	Nrxn2	19:6418730-6544899	E3KO	EfCtrl	OK	4.54532	8.33767	0.875263	1.63174	0.00435	0.031197	yes	Nrxn2	4.00641	3.15122	4.1902	9.22952	5.99703	7.94341
XLOC_025070	XLOC_025070	Nsg1	5:38038741-38159467	E3KO	EfCtrl	OK	22.6662	46.8531	1.0476	2.98891	5e-05	0.000724232	yes	Nsg1	16.0053	25.8972	16.6515	46.2761	41.9855	44.0638
XLOC_000945	XLOC_000945	Nsl1	1:191063011-191084558	E3KO	EfCtrl	OK	1.28766	2.70236	1.06947	2.04062	0.0004	0.00443257	yes	Nsl1	0.908986	1.2058	1.16602	2.53914	1.92471	3.04825
XLOC_005397	XLOC_005397	Ntn1	11:68209363-68400823	E3KO	EfCtrl	OK	1.64694	3.12332	0.923289	2.34912	0.0001	0.00134402	yes	Ntn1	1.077	1.73242	1.36623	3.11218	3.1282	2.40585
XLOC_003216	XLOC_003216	Nts	10:102481759-102490418	E3KO	EfCtrl	OK	43.7655	151.393	1.79043	6.77766	5e-05	0.000724232	yes	Nts	58.6664	37.0254	18.0978	164.49	107.814	165.075
XLOC_028809	XLOC_028809	Nucb2	7:116504373-116540584	E3KO	EfCtrl	OK	27.9908	17.9445	-0.641409	-2.37274	5e-05	0.000724232	yes	Nucb2	24.3435	21.731	24.3465	16.0047	18.4615	15.2358
XLOC_001734	XLOC_001734	Nuf2	1:169497933-169531464	E3KO	EfCtrl	OK	4.41949	10.9063	1.30321	3.84306	5e-05	0.000724232	yes	Nuf2	2.59304	4.56134	4.36438	10.7316	7.95141	12.125
XLOC_002140	XLOC_002140	Nus1	10:52417546-52440192	E3KO	EfCtrl	OK	98.1508	56.6567	-0.792753	-2.44103	0.00035	0.00396199	yes	Nus1	80.7782	82.7333	95.8395	50.8304	62.5342	52.8731
XLOC_017104	XLOC_017104	Nusap1	2:119609511-119651244	E3KO	EfCtrl	OK	6.92753	13.2988	0.940884	2.72014	5e-05	0.000724232	yes	Nusap1	6.89078	5.20861	5.78872	13.7227	10.9359	13.2593
XLOC_025191	XLOC_025191	Ociad2	5:73322198-73338947	E3KO	EfCtrl	OK	7.57723	3.36176	-1.17246	-2.06831	0.00125	0.0114398	yes	Ociad2	8.45708	4.93654	5.95644	3.57932	3.18518	2.74608
XLOC_008841	XLOC_008841	Ocln	13:100496506-100552718	E3KO	EfCtrl	OK	2.23033	4.3078	0.949697	1.56095	0.0039	0.0286427	yes	Ocln	2.82245	1.35308	1.57576	4.13648	3.1875	4.89899
XLOC_006329	XLOC_006329	Odc1	12:17544872-17551502	E3KO	EfCtrl	OK	269.289	161.403	-0.738487	-3.22988	5e-05	0.000724232	yes	Odc1	244.212	220.368	219.716	154.206	144.928	151.956
XLOC_000807	XLOC_000807	Olfml2b	1:170644531-170682789	E3KO	EfCtrl	OK	1.56736	3.29119	1.07028	2.36047	5e-05	0.000724232	yes	Olfml2b	0.530623	2.08873	1.44317	2.87242	2.71104	3.53663
XLOC_016195	XLOC_016195	Otud1	2:19658061-19660590	E3KO	EfCtrl	OK	5.12179	7.71231	0.590514	1.57794	0.00525	0.0361338	yes	Otud1	5.5248	3.90469	3.8034	7.38235	6.64231	8.20311
XLOC_016901	XLOC_016901	Pacsin3	2:91250742-91264679	E3KO	EfCtrl	OK	1.53509	3.38945	1.14273	1.52558	0.0004	0.00443257	yes	Pacsin3	0.75871	2.5625	1.73633	4.79471	2.50191	2.98892
XLOC_031845	XLOC_031845	Palld	8:61513245-61922834	E3KO	EfCtrl	OK	49.8826	21.6944	-1.20122	-2.45622	5e-05	0.000724232	yes	Palld	47.3879	41.424	34.6857	15.6876	23.1201	21.6419
XLOC_002312	XLOC_002312	Palm	10:79793571-79820896	E3KO	EfCtrl	OK	5.81751	12.127	1.05975	3.19166	5e-05	0.000724232	yes	Palm	3.88381	5.65154	4.99612	14.7082	9.23406	9.50602
XLOC_020931	XLOC_020931	Palmd	3:116918255-116984406	E3KO	EfCtrl	OK	14.7482	6.17519	-1.25598	-4.03165	5e-05	0.000724232	yes	Palmd	10.8736	15.5905	13.0562	4.50627	8.18798	5.49866
XLOC_015324	XLOC_015324	Papss2	19:32620004-32667187	E3KO	EfCtrl	OK	2.63319	1.18033	-1.15762	-2.59141	0.0001	0.00134402	yes	Papss2	1.22377	2.22385	3.40539	0.999739	1.13824	1.19935
XLOC_013629	XLOC_013629	Paqr4	17:23726335-23740330	E3KO	EfCtrl	OK	0.719971	2.11506	1.55469	2.39073	0.00025	0.00297984	yes	Paqr4	0.194559	1.08945	0.578837	2.60628	1.54566	1.76316
XLOC_003012	XLOC_003012	Pcbp3	10:76761856-76961887	E3KO	EfCtrl	OK	5.05046	10.121	1.00286	1.69435	0.0006	0.0062413	yes	Pcbp3	1.02887	6.30355	6.03092	10.7876	9.11068	8.83306
XLOC_014841	XLOC_014841	Pcdh1	18:38185914-38229145	E3KO	EfCtrl	OK	38.8396	27.1599	-0.516053	-1.94121	0.0009	0.00873141	yes	Pcdh1	29.4887	39.5069	40.5929	30.433	31.6769	28.6499
XLOC_014843	XLOC_014843	Pcdh12	18:38267091-38284401	E3KO	EfCtrl	OK	34.2239	21.8346	-0.648384	-2.76013	5e-05	0.000724232	yes	Pcdh12	29.0528	28.1366	29.4436	21.7812	19.3278	19.7911
XLOC_009678	XLOC_009678	Pcdh17	14:84443562-84537060	E3KO	EfCtrl	OK	2.07804	1.35762	-0.614146	-1.77199	0.0031	0.0238603	yes	Pcdh17	1.3549	1.64833	2.43487	1.09778	1.02787	1.7671
XLOC_018960	XLOC_018960	Pcna	2:132249161-132253314	E3KO	EfCtrl	OK	8.90421	13.7614	0.628064	1.73006	0.00255	0.020354	yes	Pcna	6.80841	9.68802	6.83119	13.3936	12.3717	13.8087
XLOC_034836	XLOC_034836	Pcyt1b	X:93654862-93749951	E3KO	EfCtrl	OK	2.14037	1.24803	-0.778207	-1.67469	0.002	0.0167846	yes	Pcyt1b	2.11264	1.35982	1.94703	1.04185	0.965716	1.48539
XLOC_018351	XLOC_018351	Pde1a	2:79834452-80129458	E3KO	EfCtrl	OK	2.49386	0.402453	-2.63149	-3.25698	5e-05	0.000724232	yes	Pde1a	2.08654	1.88143	2.48097	0.242655	0.498758	0.403723
XLOC_025675	XLOC_025675	Pdgfa	5:138976013-139000576	E3KO	EfCtrl	OK	5.00146	2.08198	-1.26439	-1.6394	0.002	0.0167846	yes	Pdgfa	5.25932	2.54281	4.05817	1.08487	2.51571	1.9359
XLOC_016652	XLOC_016652	Pdk1	2:71873223-71903858	E3KO	EfCtrl	OK	24.1152	9.95881	-1.2759	-2.80463	5e-05	0.000724232	yes	Pdk1	26.0368	14.9356	18.8209	8.79842	8.4857	10.5563
XLOC_026788	XLOC_026788	Pdk4	6:5483350-5496309	E3KO	EfCtrl	OK	11.9459	3.83364	-1.63973	-4.84096	5e-05	0.000724232	yes	Pdk4	9.17473	10.1444	11.6894	2.6809	4.81926	3.38681
XLOC_008595	XLOC_008595	Pdlim7	13:55495794-55513676	E3KO	EfCtrl	OK	18.9492	31.957	0.753995	2.57835	5e-05	0.000724232	yes	Pdlim7	15.3188	18.8028	13.3891	32.4002	29.2711	27.6075
XLOC_031402	XLOC_031402	Pdp2	8:104591467-104596836	E3KO	EfCtrl	OK	1.5352	2.76117	0.846856	1.87807	0.00205	0.0171154	yes	Pdp2	0.712808	1.78177	1.50289	3.02948	1.96534	2.81411
XLOC_019123	XLOC_019123	Pdrg1	2:153008889-153015427	E3KO	EfCtrl	OK	91.4851	57.9233	-0.659392	-1.93763	0.00075	0.007507	yes	Pdrg1	78.1819	72.5178	79.7345	51.4842	56.1795	52.5116
XLOC_011091	XLOC_011091	Pdzd2	15:12357053-12592556	E3KO	EfCtrl	OK	1.64987	2.45339	0.572426	1.93035	0.00075	0.007507	yes	Pdzd2	1.04789	1.4558	1.71228	2.37541	2.07257	2.40939
XLOC_001984	XLOC_001984	Perp	10:18845070-18857073	E3KO	EfCtrl	OK	24.3311	5.36104	-2.18222	-6.23586	5e-05	0.000724232	yes	Perp	19.1124	17.6144	27.0823	4.37734	6.54161	4.53216
XLOC_022478	XLOC_022478	Pex10	4:155067015-155072433	E3KO	EfCtrl	OK	3.61669	1.21875	-1.56927	-2.42233	5e-05	0.000724232	yes	Pex10	5.9166	1.33094	1.56351	1.3261	1.39074	1.04852
XLOC_020280	XLOC_020280	Pex2	3:5560187-5576239	E3KO	EfCtrl	OK	5.65433	9.03729	0.676535	1.91162	0.00125	0.0114398	yes	Pex2	2.76377	5.81023	6.53251	8.73428	8.78292	8.65673
XLOC_020449	XLOC_020449	Pfn2	3:57841894-57847564	E3KO	EfCtrl	OK	39.298	24.7155	-0.669041	-2.4619	5e-05	0.000724232	yes	Pfn2	35.129	33.8624	34.2815	20.1645	25.4643	26.3113
XLOC_007210	XLOC_007210	Pgf	12:85166638-85177296	E3KO	EfCtrl	OK	162.295	249.334	0.61946	2.70036	5e-05	0.000724232	yes	Pgf	132.016	157.592	117.771	225.47	227.893	229.836
XLOC_027928	XLOC_027928	Pglyrp1	7:18884689-18890438	E3KO	EfCtrl	OK	20.6271	6.23942	-1.72506	-3.41269	5e-05	0.000724232	yes	Pglyrp1	17.6502	11.9358	22.4825	6.76165	5.71105	4.92853
XLOC_015757	XLOC_015757	Pgm5	19:24683015-24861855	E3KO	EfCtrl	OK	22.4325	39.3083	0.809241	2.67495	5e-05	0.000724232	yes	Pgm5	22.2603	15.4294	15.07	45.212	27.4947	37.0394
XLOC_034506	XLOC_034506	Phf6	X:52912265-52956943	E3KO	EfCtrl	OK	16.9586	24.8666	0.552194	2.09178	0.00025	0.00297984	yes	Phf6	11.7443	18.4102	15.1207	24.5462	23.1707	24.8621
XLOC_003416	XLOC_003416	Pik3ip1	11:3288873-3342971	E3KO	EfCtrl	OK	4.27977	10.484	1.29258	1.94122	0.00455	0.0323455	yes	Pik3ip1	1.64259	5.76612	3.15732	8.96066	7.20728	10.171
XLOC_021909	XLOC_021909	Pik3r3	4:116221617-116303056	E3KO	EfCtrl	OK	53.0178	32.5498	-0.70383	-2.38139	5e-05	0.000724232	yes	Pik3r3	43.8147	47.4731	47.3553	30.5369	32.6687	30.2079
XLOC_012993	XLOC_012993	Pim1	17:29461895-29495445	E3KO	EfCtrl	OK	27.5583	15.6047	-0.820512	-2.71427	5e-05	0.000724232	yes	Pim1	33.0862	17.6676	17.0132	14.3711	13.8372	14.6709
XLOC_015884	XLOC_015884	Pkd2l1	19:44147636-44192442	E3KO	EfCtrl	OK	1.42556	5.26951	1.88615	4.43525	5e-05	0.000724232	yes	Pkd2l1	0.55579	2.01317	1.12035	4.92869	4.58932	5.05992
XLOC_019475	XLOC_019475	Pkia	3:7366603-7445366	E3KO	EfCtrl	OK	7.15928	10.5945	0.565424	1.95469	0.0007	0.00709513	yes	Pkia	3.59137	8.34884	7.48639	9.98252	11.0835	10.242
XLOC_032694	XLOC_032694	Pkm	9:59656367-59679375	E3KO	EfCtrl	OK	385.622	261.019	-0.563031	-2.43689	5e-05	0.000724232	yes	Pkm	249.476	338.737	370.569	247.841	260.558	200.094
XLOC_013240	XLOC_013240	Pla2g7	17:43568097-43612201	E3KO	EfCtrl	OK	11.2754	7.11906	-0.663417	-1.76167	0.00165	0.0143734	yes	Pla2g7	8.71996	9.06537	11.7419	4.92752	11.1612	4.3982
XLOC_030972	XLOC_030972	Plat	8:22757743-22782847	E3KO	EfCtrl	OK	39.1063	57.6314	0.559454	2.32116	5e-05	0.000724232	yes	Plat	32.4496	40.9086	25.8404	54.6301	52.6236	52.8105
XLOC_015364	XLOC_015364	Plce1	19:38524196-38785098	E3KO	EfCtrl	OK	2.39318	7.42927	1.63429	5.76733	5e-05	0.000724232	yes	Plce1	2.47509	2.50526	1.15729	8.23204	4.95575	7.80247
XLOC_001812	XLOC_001812	Pld5	1:175962305-176275312	E3KO	EfCtrl	OK	3.66371	7.3894	1.01215	2.49878	5e-05	0.000724232	yes	Pld5	2.69543	4.05679	2.71763	5.614	6.00825	9.1175
XLOC_006541	XLOC_006541	Plekhg3	12:76533559-76579039	E3KO	EfCtrl	OK	2.19436	4.05903	0.887335	2.47991	5e-05	0.000724232	yes	Plekhg3	0.917906	2.51815	2.13511	3.83835	4.00658	3.26225
XLOC_023048	XLOC_023048	Plin2	4:86648385-86670060	E3KO	EfCtrl	OK	143.928	78.8669	-0.867855	-2.68173	5e-05	0.000724232	yes	Plin2	132.089	131.229	114.284	68.1663	80.4691	72.1593
XLOC_028851	XLOC_028851	Plk1	7:122159436-122169875	E3KO	EfCtrl	OK	2.6558	8.33595	1.6502	3.83282	5e-05	0.000724232	yes	Plk1	1.39573	2.67681	2.722	8.34617	6.23674	8.54468
XLOC_032892	XLOC_032892	Plscr2	9:92275601-92297752	E3KO	EfCtrl	OK	52.8431	16.7177	-1.66034	-5.67746	5e-05	0.000724232	yes	Plscr2	53.6098	37.9997	48.9015	12.9043	18.9631	16.5271
XLOC_032894	XLOC_032894	Plscr4	9:92457377-92493510	E3KO	EfCtrl	OK	7.62576	13.6782	0.842929	2.90984	5e-05	0.000724232	yes	Plscr4	3.0587	9.29974	8.384	13.7792	12.3232	14.2994
XLOC_016177	XLOC_016177	Plxdc2	2:16356303-16755839	E3KO	EfCtrl	OK	3.54006	1.99822	-0.825059	-1.6762	0.00535	0.0366684	yes	Plxdc2	2.20798	3.54955	3.40716	1.24173	2.68207	1.67489
XLOC_014596	XLOC_014596	Pmaip1	18:66458603-66465550	E3KO	EfCtrl	OK	20.2616	12.5715	-0.688593	-2.45253	5e-05	0.000724232	yes	Pmaip1	14.1891	19.3985	20.2649	8.43208	15.9452	12.2818
XLOC_020597	XLOC_020597	Pmf1	3:88394142-88410316	E3KO	EfCtrl	OK	3.10401	8.31529	1.42163	2.60079	5e-05	0.000724232	yes	Pmf1	0.394083	2.92979	4.62552	8.74219	5.06949	9.02631
XLOC_003947	XLOC_003947	Pmp22	11:63128981-63159547	E3KO	EfCtrl	OK	21.3775	12.7305	-0.747797	-2.40658	5e-05	0.000724232	yes	Pmp22	14.4811	16.5318	25.0828	9.40798	14.0236	12.964
XLOC_035978	XLOC_035978	Pnck	X:73655993-73660117	E3KO	EfCtrl	OK	0.756045	1.69551	1.16518	1.51771	0.0066	0.0431998	yes	Pnck	0.429426	0.54984	0.92636	1.70453	1.19314	1.78087
XLOC_026901	XLOC_026901	Podxl	6:31519487-31563981	E3KO	EfCtrl	OK	20.0962	37.4946	0.899765	3.79971	5e-05	0.000724232	yes	Podxl	15.1236	18.9604	17.8321	37.2938	31.5092	37.4676
XLOC_024460	XLOC_024460	Pole	5:110286305-110337474	E3KO	EfCtrl	OK	42.5955	23.0071	-0.888624	-2.83181	5e-05	0.000724232	yes	Pole	38.56	34.6278	35.3591	21.9882	22.4161	20.2375
XLOC_007098	XLOC_007098	Pole2	12:69201778-69228190	E3KO	EfCtrl	OK	2.04271	4.2045	1.04145	2.01835	0.0021	0.0174552	yes	Pole2	0	2.41122	3.07815	4.45792	2.98644	4.56719
XLOC_026786	XLOC_026786	Pon3	6:5220851-5256286	E3KO	EfCtrl	OK	16.6588	9.7357	-0.774924	-1.67837	0.00335	0.0254018	yes	Pon3	9.34798	16.0814	18.3236	10.0593	8.80805	8.94887
XLOC_014082	XLOC_014082	Pot1b	17:55652024-55712628	E3KO	EfCtrl	OK	1.49404	2.66781	0.836439	1.99094	0.0012	0.0110638	yes	Pot1b	0.634289	1.93051	1.36386	2.52709	2.43448	2.60547
XLOC_001715	XLOC_001715	Pou2f1	1:165781074-166002678	E3KO	EfCtrl	OK	22.7051	3.13228	-2.85773	-10.3862	5e-05	0.000724232	yes	Pou2f1	3.20843	2.91556	54.1418	2.8815	2.71611	3.39403
XLOC_011580	XLOC_011580	Pou6f1	15:100575317-100599984	E3KO	EfCtrl	OK	3.93994	5.67969	0.527639	1.47119	0.00705	0.0454691	yes	Pou6f1	2.27421	4.07007	4.41465	6.26259	4.47972	5.92708
XLOC_026483	XLOC_026483	Pparg	6:115361220-115490401	E3KO	EfCtrl	OK	19.4548	11.7604	-0.726189	-2.43403	5e-05	0.000724232	yes	Pparg	17.1428	16.398	15.9739	11.2711	11.607	9.99547
XLOC_028475	XLOC_028475	Prc1	7:80294449-80316259	E3KO	EfCtrl	OK	10.7329	25.8785	1.26971	3.95411	5e-05	0.000724232	yes	Prc1	8.74829	9.16851	9.91203	27.5189	21.5938	24.2223
XLOC_028565	XLOC_028565	Prcp	7:92875252-92934573	E3KO	EfCtrl	OK	141.609	94.7232	-0.580126	-2.53359	5e-05	0.000724232	yes	Prcp	111.248	136.847	122.474	82.1601	95.8339	94.1049
XLOC_001675	XLOC_001675	Prdx6	1:161240111-161251219	E3KO	EfCtrl	OK	215.904	138.39	-0.641646	-2.32976	5e-05	0.000724232	yes	Prdx6	168.178	175.633	202.51	124.495	139.396	120.351
XLOC_000030	XLOC_000030	Prex2	1:10993464-11303682	E3KO	EfCtrl	OK	24.6278	16.6785	-0.562293	-2.44092	5e-05	0.000724232	yes	Prex2	21.6482	20.4027	23.1906	16.5819	14.7371	17.3201
XLOC_002618	XLOC_002618	Prim1	10:128015167-128030037	E3KO	EfCtrl	OK	3.36348	8.2635	1.2968	2.88769	5e-05	0.000724232	yes	Prim1	0.153444	4.73366	4.11393	8.18501	7.69844	7.55881
XLOC_001086	XLOC_001086	Prim2	1:33453810-33669786	E3KO	EfCtrl	OK	4.67756	7.3607	0.654087	1.72525	0.0035	0.0262985	yes	Prim2	2.48023	4.92126	4.75931	7.74273	6.49237	6.48947
XLOC_025676	XLOC_025676	Prkar1b	5:139017305-139186510	E3KO	EfCtrl	OK	8.27258	0.961903	-3.10437	-2.06714	5e-05	0.000724232	yes	Prkar1b	15.0457	1.48072	2.50526	0.317983	1.26047	0.747512
XLOC_030395	XLOC_030395	Prkcdbp	7:105480606-105482197	E3KO	EfCtrl	OK	8.19732	18.5314	1.17675	2.85768	5e-05	0.000724232	yes	Prkcdbp	6.13682	7.5243	6.64504	18.1931	13.4321	18.4466
XLOC_023843	XLOC_023843	Prkcz	4:155260128-155361361	E3KO	EfCtrl	OK	15.7822	28.1489	0.834779	2.88734	5e-05	0.000724232	yes	Prkcz	11.1856	15.4808	13.113	30.0945	21.274	26.1692
XLOC_007033	XLOC_007033	Prkd1	12:50341230-50649223	E3KO	EfCtrl	OK	2.1412	6.267	1.54936	4.20313	5e-05	0.000724232	yes	Prkd1	1.46413	1.92787	2.12075	6.98936	4.3843	6.24308
XLOC_007748	XLOC_007748	Prl6a1	13:27312626-27319252	E3KO	EfCtrl	OK	4.13895	0.604449	-2.77557	-3.10694	5e-05	0.000724232	yes	Prl6a1	5.84005	1.80709	2.90321	0.282725	1.07961	0.366908
XLOC_017469	XLOC_017469	Procr	2:155751116-155755471	E3KO	EfCtrl	OK	250.332	160.816	-0.638437	-2.75833	5e-05	0.000724232	yes	Procr	177.173	195.37	209.581	143.441	152.229	117.784
XLOC_001886	XLOC_001886	Prox1	1:190118037-190217276	E3KO	EfCtrl	OK	78.8761	139.117	0.818641	3.45307	5e-05	0.000724232	yes	Prox1	58.0703	79.1911	64.6772	134.27	117.292	145.446
XLOC_036695	XLOC_036695	Prps2	X:167346321-167382749	E3KO	EfCtrl	OK	30.9908	18.6982	-0.728939	-2.59686	5e-05	0.000724232	yes	Prps2	28.2838	25.6934	27.708	16.7807	20.0952	17.2195
XLOC_005699	XLOC_005699	Prr11	11:87089152-87108708	E3KO	EfCtrl	OK	3.71065	8.59013	1.21101	3.87004	5e-05	0.000724232	yes	Prr11	3.25835	3.03742	3.5575	9.88518	6.62812	8.67038
XLOC_018686	XLOC_018686	Prrg4	2:104830740-104849876	E3KO	EfCtrl	OK	28.2523	10.8956	-1.37462	-2.5483	5e-05	0.000724232	yes	Prrg4	25.866	22.0626	24.5846	9.01518	13.3339	8.94772
XLOC_008336	XLOC_008336	Prss16	13:22002175-22009742	E3KO	EfCtrl	OK	3.99912	2.08017	-0.942983	-1.59198	0.00555	0.0377376	yes	Prss16	5.19378	1.93909	2.24524	2.40916	0.786113	2.88729
XLOC_027926	XLOC_027926	Psg22	7:18718089-18727248	E3KO	EfCtrl	OK	40.9949	8.95678	-2.19439	-7.41446	5e-05	0.000724232	yes	Psg22	35.5069	30.8626	38.6999	6.29563	12.3998	6.48791
XLOC_016153	XLOC_016153	Pter	2:12924040-13003453	E3KO	EfCtrl	OK	37.8193	24.9137	-0.60218	-1.69086	0.00325	0.0247798	yes	Pter	39.422	27.6197	27.86	21.633	26.7656	20.785
XLOC_021062	XLOC_021062	Ptgfr	3:151798917-151837630	E3KO	EfCtrl	OK	2.31072	0.869323	-1.41038	-1.51412	0.0029	0.0226265	yes	Ptgfr	2.27016	1.17311	2.02201	0.627632	1.09527	0.742067
XLOC_020811	XLOC_020811	Ptgfrn	3:101040231-101110278	E3KO	EfCtrl	OK	13.72	22.5844	0.719046	2.90082	5e-05	0.000724232	yes	Ptgfrn	7.17019	14.8169	13.1055	21.0899	19.4476	22.0749
XLOC_000699	XLOC_000699	Ptgs2	1:150100123-150108010	E3KO	EfCtrl	OK	13.7896	2.68701	-2.35951	-7.39568	5e-05	0.000724232	yes	Ptgs2	11.4236	9.15625	15.8517	2.04773	3.20805	2.57499
XLOC_007265	XLOC_007265	Ptpn21	12:98676740-98737405	E3KO	EfCtrl	OK	3.16735	4.57102	0.52924	1.63259	0.00515	0.0356208	yes	Ptpn21	1.3106	4.0386	2.86927	4.76798	3.8817	4.18162
XLOC_023333	XLOC_023333	Ptprf	4:118208212-118291405	E3KO	EfCtrl	OK	2.22118	5.30365	1.25566	2.56937	5e-05	0.000724232	yes	Ptprf	1.86162	2.13869	1.84533	6.26955	4.14603	5.28761
XLOC_001306	XLOC_001306	Ptprn	1:75247040-75264208	E3KO	EfCtrl	OK	7.81563	14.2754	0.869096	2.93659	5e-05	0.000724232	yes	Ptprn	4.25938	8.26185	7.22718	13.9768	13.0784	12.0704
XLOC_014101	XLOC_014101	Ptprs	17:56412430-56476483	E3KO	EfCtrl	OK	0.82199	2.26785	1.46413	3.11728	5e-05	0.000724232	yes	Ptprs	0.544842	0.96272	0.565611	1.95088	2.19887	2.0514
XLOC_008485	XLOC_008485	Pxdc1	13:34627839-34652681	E3KO	EfCtrl	OK	11.4295	20.9935	0.87718	2.59206	5e-05	0.000724232	yes	Pxdc1	6.60899	11.4514	8.81009	19.5764	18.8273	17.6196
XLOC_006229	XLOC_006229	Pycr1	11:120635711-120643769	E3KO	EfCtrl	OK	3.1762	1.64336	-0.950649	-1.58385	0.00205	0.0171154	yes	Pycr1	4.83922	1.96504	0.992736	1.64303	1.88779	1.03105
XLOC_004184	XLOC_004184	Rab34	11:78188429-78192193	E3KO	EfCtrl	OK	14.1273	5.24683	-1.42896	-2.84014	5e-05	0.000724232	yes	Rab34	13.2568	10.6	11.9049	3.03428	6.50743	4.8813
XLOC_033269	XLOC_033269	Rab3d	9:21907490-21918192	E3KO	EfCtrl	OK	2.82518	5.13022	0.860679	2.22765	0.00015	0.00192134	yes	Rab3d	1.96324	2.75742	2.52299	6.2675	3.61602	4.53628
XLOC_015172	XLOC_015172	Rab3il1	19:10001668-10038380	E3KO	EfCtrl	OK	16.2282	26.8676	0.727361	2.16494	5e-05	0.000724232	yes	Rab3il1	9.32843	16.0817	15.5283	31.2191	20.8463	22.2209
XLOC_032947	XLOC_032947	Rab6b	9:103112073-103185270	E3KO	EfCtrl	OK	2.28806	3.60906	0.657496	1.81457	0.00155	0.0136555	yes	Rab6b	2.35815	2.07884	1.43028	3.19578	3.25935	3.7753
XLOC_011565	XLOC_011565	Racgap1	15:99620495-99651656	E3KO	EfCtrl	OK	11.394	18.6126	0.708012	1.78971	0.001	0.00952306	yes	Racgap1	11.6547	8.25699	8.15716	18.5031	15.954	17.2298
XLOC_011083	XLOC_011083	Rai14	15:10568978-10714631	E3KO	EfCtrl	OK	46.242	26.5647	-0.799696	-3.43339	5e-05	0.000724232	yes	Rai14	35.629	36.9895	45.2206	24.8756	25.6117	23.8681
XLOC_006882	XLOC_006882	Rapgef5	12:117516478-117756978	E3KO	EfCtrl	OK	29.1244	18.6497	-0.643076	-2.64302	5e-05	0.000724232	yes	Rapgef5	26.0162	25.1271	22.9367	17.1631	17.1514	17.8477
XLOC_001216	XLOC_001216	Raph1	1:60483235-60567104	E3KO	EfCtrl	OK	59.8573	40.7923	-0.55323	-2.25556	0.00015	0.00192134	yes	Raph1	42.7372	54.0124	58.0743	37.4798	37.6007	41.5999
XLOC_024225	XLOC_024225	Rasl11b	5:74195295-74199478	E3KO	EfCtrl	OK	5.82348	3.04485	-0.93551	-2.03654	0.00095	0.00913113	yes	Rasl11b	7.91582	2.85353	3.49016	3.21726	1.97445	3.22372
XLOC_000749	XLOC_000749	Rc3h1	1:160906417-160974978	E3KO	EfCtrl	OK	25.9124	16.845	-0.621324	-2.18828	0.00015	0.00192134	yes	Rc3h1	18.9664	23.1027	24.4458	16.3682	14.7365	16.4724
XLOC_012668	XLOC_012668	Rcan1	16:92391952-92466146	E3KO	EfCtrl	OK	33.4818	49.3368	0.559287	2.26769	0.0001	0.00134402	yes	Rcan1	22.8462	35.1417	27.4105	46.8199	46.1506	44.0616
XLOC_009644	XLOC_009644	Rcbtb2	14:73123036-73325822	E3KO	EfCtrl	OK	93.4393	41.2591	-1.17932	-1.94215	0.0006	0.0062413	yes	Rcbtb2	61.322	85.7013	95.8576	41.4907	36.5547	38.0596
XLOC_004532	XLOC_004532	Rdm1	11:101627194-101636100	E3KO	EfCtrl	OK	0.79734	3.62088	2.18307	1.07602	0.00425	0.0306269	yes	Rdm1	0.110328	0.829282	1.1312	3.7121	3.21324	3.1795
XLOC_026265	XLOC_026265	Reep1	6:71707560-71810710	E3KO	EfCtrl	OK	18.4471	30.5262	0.726658	2.91143	5e-05	0.000724232	yes	Reep1	13.9353	16.949	16.7299	30.8776	23.567	31.9195
XLOC_014402	XLOC_014402	Reep2	18:34840588-34847463	E3KO	EfCtrl	OK	4.88125	2.42891	-1.00694	-2.10416	0.0009	0.00873141	yes	Reep2	4.08782	3.84073	4.24476	2.59445	2.29337	1.82591
XLOC_027654	XLOC_027654	Rerg	6:137054824-137170497	E3KO	EfCtrl	OK	10.6344	5.23421	-1.0227	-2.87491	5e-05	0.000724232	yes	Rerg	12.0098	7.52353	8.20347	4.5663	4.19256	6.03726
XLOC_001593	XLOC_001593	Rgs2	1:143999337-144004161	E3KO	EfCtrl	OK	22.179	7.60809	-1.54359	-3.00374	5e-05	0.000724232	yes	Rgs2	13.4554	11.3577	19.1318	6.40598	7.58922	8.19036
XLOC_028106	XLOC_028106	Rinl	7:28788968-28798963	E3KO	EfCtrl	OK	2.87295	0.924889	-1.63518	-3.02597	5e-05	0.000724232	yes	Rinl	5.00255	0.623068	1.2881	0.749836	0.869846	0.916431
XLOC_010252	XLOC_010252	Ripk3	14:55784995-55788857	E3KO	EfCtrl	OK	26.4102	13.2205	-0.998319	-3.41751	5e-05	0.000724232	yes	Ripk3	21.1534	23.0748	22.0432	11.5851	14.941	9.81512
XLOC_010174	XLOC_010174	Rnase1	14:51145001-51146767	E3KO	EfCtrl	OK	5.46598	1.5788	-1.79165	-2.78427	5e-05	0.000724232	yes	Rnase1	5.48741	3.80317	4.56153	1.15464	1.35271	1.8883
XLOC_006364	XLOC_006364	Rnaseh1	12:28649601-28659591	E3KO	EfCtrl	OK	2.31282	4.21485	0.865826	1.66236	0.0054	0.0369354	yes	Rnaseh1	0.956528	2.51684	2.39722	4.52392	3.40434	3.61161
XLOC_009572	XLOC_009572	Rnaseh2b	14:62276230-62372992	E3KO	EfCtrl	OK	11.3354	18.6437	0.717854	2.00821	0.0007	0.00709513	yes	Rnaseh2b	4.94162	12.7634	11.7402	17.8334	14.457	19.9609
XLOC_014338	XLOC_014338	Rnf125	18:20944624-20983848	E3KO	EfCtrl	OK	25.6185	36.5939	0.514419	1.86237	0.0012	0.0110638	yes	Rnf125	20.0368	25.4312	21.3297	36.5263	30.0481	37.9806
XLOC_007868	XLOC_007868	Rnf144b	13:47122719-47247991	E3KO	EfCtrl	OK	10.2058	5.83029	-0.807757	-2.77459	5e-05	0.000724232	yes	Rnf144b	8.53703	8.26715	9.74277	5.05709	5.61812	5.98686
XLOC_031260	XLOC_031260	Rnf150	8:82863355-83091271	E3KO	EfCtrl	OK	1.26292	2.51752	0.995237	2.94629	5e-05	0.000724232	yes	Rnf150	0.606441	1.41399	1.29657	2.47165	2.17665	2.52752
XLOC_002837	XLOC_002837	RP24-170A20.3	10:39890017-39899238	E3KO	EfCtrl	OK	2.5418	4.1804	0.717793	1.88806	0.00095	0.00913113	yes	RP24-170A20.3	1.58406	2.50097	2.52264	3.8471	3.96114	4.062
XLOC_026806	XLOC_026806	Rpa3	6:8255935-8259173	E3KO	EfCtrl	OK	8.76334	20.6301	1.2352	2.69446	5e-05	0.000724232	yes	Rpa3	2.87219	10.1316	10.1394	15.9191	21.5594	20.9068
XLOC_032970	XLOC_032970	Rpl29	9:106429453-106431568	E3KO	EfCtrl	OK	4.85934	2.05624	-1.24075	-1.60291	0.00785	0.0495383	yes	Rpl29	10.1887	0.239504	0.98986	2.57001	1.13292	1.98006
XLOC_011037	XLOC_011037	Rpl39-ps	15:102634981-102635336	E3KO	EfCtrl	OK	52.9406	24.6219	-1.10443	-2.02839	0.0005	0.00535591	yes	Rpl39-ps	105.809	8.37732	13.8333	25.5838	20.3487	23.0875
XLOC_030196	XLOC_030196	Rps13-ps2	7:88530404-88530925	E3KO	EfCtrl	OK	7.75061	1.69896	-2.18966	-2.41561	0.0003	0.00348276	yes	Rps13-ps2	16.8119	1.23474	0.618905	1.8592	2.19099	0.706406
XLOC_034773	XLOC_034773	Rps24-ps3	X:79195046-79195448	E3KO	EfCtrl	OK	16.4991	5.00092	-1.72212	-2.47017	0.00015	0.00192134	yes	Rps24-ps3	33.8615	2.80773	3.5505	5.71631	3.90181	4.35343
XLOC_018323	XLOC_018323	Rps6-ps4	2:75191033-75191854	E3KO	EfCtrl	OK	9.06135	4.44055	-1.02899	-1.77836	0.00255	0.020354	yes	Rps6-ps4	17.5573	1.9316	2.19979	4.7127	3.10182	4.54417
XLOC_015596	XLOC_015596	Rps6ka4	19:6829084-6840601	E3KO	EfCtrl	OK	7.11686	10.6276	0.578498	1.78772	0.0019	0.0161162	yes	Rps6ka4	2.96386	8.03695	7.04491	9.83376	9.76032	9.35998
XLOC_002797	XLOC_002797	Rspo3	10:29453108-29535867	E3KO	EfCtrl	OK	2.64124	4.23434	0.680919	1.65635	0.00585	0.0393245	yes	Rspo3	2.30565	2.38138	2.19524	3.8788	3.3041	4.94123
XLOC_011825	XLOC_011825	Rtp4	16:23609918-23614222	E3KO	EfCtrl	OK	19.7517	11.0581	-0.836876	-2.61671	5e-05	0.000724232	yes	Rtp4	23.9475	16.1416	10.6369	9.18528	14.6547	7.73528
XLOC_020647	XLOC_020647	S100a1	3:90511033-90514392	E3KO	EfCtrl	OK	33.6333	17.421	-0.949061	-2.5721	5e-05	0.000724232	yes	S100a1	35.2597	21.676	25.1936	17.2605	18.9773	11.2146
XLOC_002646	XLOC_002646	Sarnp	10:128821770-128877638	E3KO	EfCtrl	OK	36.6076	24.5595	-0.57586	-1.96094	0.00035	0.00396199	yes	Sarnp	42.7343	28.7011	20.3278	24.9261	20.8836	22.1606
XLOC_031852	XLOC_031852	Sc4mol	8:64718138-64733792	E3KO	EfCtrl	OK	33.2917	19.6638	-0.759622	-2.39592	5e-05	0.000724232	yes	Sc4mol	22.9379	27.6285	37.4796	19.0365	17.9821	19.5864
XLOC_015886	XLOC_015886	Scd1	19:44394450-44407709	E3KO	EfCtrl	OK	3.96045	2.35165	-0.751991	-2.10432	0.0003	0.00348276	yes	Scd1	2.63766	3.20346	4.52288	1.60318	2.95643	2.15368
XLOC_015639	XLOC_015639	Scgb1a1	19:9083635-9087958	E3KO	EfCtrl	OK	19.6212	0.588607	-5.05897	-4.47556	0.00025	0.00297984	yes	Scgb1a1	46.2439	0	0.654863	0.355622	1.1503	0.122261
XLOC_000193	XLOC_000193	Sdpr	1:51289125-51302959	E3KO	EfCtrl	OK	100.674	144.318	0.519565	2.27414	5e-05	0.000724232	yes	Sdpr	92.3983	81.034	86.8051	142.892	125.784	143.258
XLOC_000772	XLOC_000772	Selp	1:164115263-164220277	E3KO	EfCtrl	OK	88.0263	33.0849	-1.41176	-4.71391	5e-05	0.000724232	yes	Selp	74.1818	64.6222	82.3518	29.2142	32.8444	30.2867
XLOC_023932	XLOC_023932	Sema3a	5:13396783-13602565	E3KO	EfCtrl	OK	46.2374	82.0614	0.827643	1.66702	0.0009	0.00873141	yes	Sema3a	26.0781	53.0189	42.1609	85.6999	80.5156	68.208
XLOC_023930	XLOC_023930	Sema3d	5:12383165-12588943	E3KO	EfCtrl	OK	1.16108	4.93078	2.08635	5.95518	5e-05	0.000724232	yes	Sema3d	0.988986	1.1418	0.969632	5.54434	3.03291	5.92151
XLOC_009120	XLOC_009120	Sema3g	14:31217859-31230350	E3KO	EfCtrl	OK	0.499256	1.71908	1.78379	3.26087	5e-05	0.000724232	yes	Sema3g	0.371279	0.5271	0.354191	1.99577	1.21462	1.52251
XLOC_017157	XLOC_017157	Sema6d	2:124089968-124667770	E3KO	EfCtrl	OK	13.4018	8.68135	-0.626432	-2.20808	5e-05	0.000724232	yes	Sema6d	9.90108	11.3944	13.5418	7.42642	9.50923	7.81936
XLOC_006710	XLOC_006710	Serpina3g	12:104236241-104253778	E3KO	EfCtrl	OK	5.97873	0.809452	-2.88482	-4.19625	5e-05	0.000724232	yes	Serpina3g	8.28387	1.75492	4.5442	0.654895	0.988149	0.556595
XLOC_000543	XLOC_000543	Serpinb11	1:107361928-107380475	E3KO	EfCtrl	OK	6.4741	12.8448	0.988428	3.05618	5e-05	0.000724232	yes	Serpinb11	7.26604	5.0201	4.43511	12.9192	9.86552	13.9694
XLOC_008466	XLOC_008466	Serpinb1a	13:32842091-32851185	E3KO	EfCtrl	OK	5.5646	1.37625	-2.01554	-4.17495	5e-05	0.000724232	yes	Serpinb1a	3.30335	4.20764	6.88885	0.978261	1.81229	1.1105
XLOC_007790	XLOC_007790	Serpinb1b	13:33084124-33094380	E3KO	EfCtrl	OK	2.78066	1.50104	-0.889463	-1.61032	0.0047	0.0331644	yes	Serpinb1b	0.254201	2.52981	4.57058	1.12326	1.41099	1.73616
XLOC_007787	XLOC_007787	Serpinb6b	13:32965208-32979067	E3KO	EfCtrl	OK	57.1128	35.39	-0.690474	-2.7734	5e-05	0.000724232	yes	Serpinb6b	53.7319	48.0025	46.31	32.7803	37.7106	30.5722
XLOC_007789	XLOC_007789	Serpinb9b	13:33027415-33041884	E3KO	EfCtrl	OK	39.2231	16.7543	-1.22717	-4.85592	5e-05	0.000724232	yes	Serpinb9b	23.1148	41.8225	38.6106	14.2843	19.5488	14.3606
XLOC_025639	XLOC_025639	Serpine1	5:137061503-137072272	E3KO	EfCtrl	OK	143.729	59.8688	-1.26347	-5.48279	5e-05	0.000724232	yes	Serpine1	134.206	128.34	99.7955	41.6198	61.6257	61.7735
XLOC_001323	XLOC_001323	Serpine2	1:79794196-79858696	E3KO	EfCtrl	OK	62.7462	105.911	0.755249	3.22595	5e-05	0.000724232	yes	Serpine2	56.5919	57.5458	45.5765	107.974	93.7916	94.4232
XLOC_002100	XLOC_002100	Sesn1	10:41810573-41908424	E3KO	EfCtrl	OK	14.7309	21.7381	0.561383	2.06385	0.00035	0.00396199	yes	Sesn1	10.6174	13.867	13.6754	21.3938	17.877	22.1951
XLOC_003617	XLOC_003617	Sh3pxd2b	11:32347819-32428173	E3KO	EfCtrl	OK	17.102	30.1193	0.816522	3.44274	5e-05	0.000724232	yes	Sh3pxd2b	9.15334	19.4497	15.1387	27.7349	27.8451	27.8269
XLOC_031590	XLOC_031590	Shcbp1	8:4735979-4779534	E3KO	EfCtrl	OK	3.16594	6.09162	0.944193	2.4216	5e-05	0.000724232	yes	Shcbp1	4.08789	2.29996	1.78846	7.61826	4.17014	5.67552
XLOC_036574	XLOC_036574	Shroom2	X:152609508-152769465	E3KO	EfCtrl	OK	30.6383	19.5449	-0.648542	-2.79149	5e-05	0.000724232	yes	Shroom2	24.4618	26.0511	28.3518	18.2277	18.0216	19.5817
XLOC_030714	XLOC_030714	Sigirr	7:141091174-141100546	E3KO	EfCtrl	OK	2.54779	4.3813	0.782112	1.63758	0.00435	0.031197	yes	Sigirr	1.23839	2.76011	2.45148	4.86468	3.09518	4.08758
XLOC_032248	XLOC_032248	Sipa1l2	8:125418062-125492710	E3KO	EfCtrl	OK	11.2803	7.29287	-0.629251	-2.39287	5e-05	0.000724232	yes	Sipa1l2	8.4144	9.29448	10.7409	7.14431	7.04879	6.01759
XLOC_010288	XLOC_010288	Ska3	14:57806560-57826163	E3KO	EfCtrl	OK	1.94094	4.29579	1.14617	2.58211	5e-05	0.000724232	yes	Ska3	1.22451	2.01496	1.82841	3.60613	4.24512	4.36053
XLOC_014544	XLOC_014544	Slc12a2	18:57878677-57946821	E3KO	EfCtrl	OK	32.41	21.0518	-0.622493	-2.6145	5e-05	0.000724232	yes	Slc12a2	20.8056	29.8637	35.5027	16.4847	22.7168	21.903
XLOC_020028	XLOC_020028	Slc16a1	3:104638667-104658462	E3KO	EfCtrl	OK	4.52211	2.75284	-0.716077	-2.04584	0.00065	0.00667132	yes	Slc16a1	2.72449	3.73188	5.55789	2.31215	2.72439	2.95621
XLOC_036227	XLOC_036227	Slc16a2	X:103697413-103821965	E3KO	EfCtrl	OK	5.37731	9.27511	0.786479	2.42626	5e-05	0.000724232	yes	Slc16a2	4.55425	3.95605	4.17238	8.08827	4.84504	10.7863
XLOC_018958	XLOC_018958	Slc23a2	2:132052495-132220250	E3KO	EfCtrl	OK	36.4428	23.2542	-0.648141	-2.33441	5e-05	0.000724232	yes	Slc23a2	27.5683	35.0613	33.3837	22.076	24.4268	20.6329
XLOC_033585	XLOC_033585	Slc24a1	9:64922860-64951607	E3KO	EfCtrl	OK	5.1472	1.98541	-1.37435	-4.18486	5e-05	0.000724232	yes	Slc24a1	3.75587	4.72063	4.47814	1.56296	1.94341	1.94384
XLOC_023792	XLOC_023792	Slc25a33	4:149744035-149774277	E3KO	EfCtrl	OK	5.98415	3.535	-0.759434	-1.63536	0.0048	0.0337324	yes	Slc25a33	7.04276	4.31177	3.66875	2.63616	3.58059	3.65389
XLOC_003991	XLOC_003991	Slc25a35	11:68968130-68975185	E3KO	EfCtrl	OK	1.85923	4.34778	1.22557	2.13775	0.0009	0.00873141	yes	Slc25a35	0.52753	1.9927	2.40394	4.52307	3.30685	4.64293
XLOC_011487	XLOC_011487	Slc2a13	15:91267695-91573261	E3KO	EfCtrl	OK	5.23985	11.7185	1.16119	3.64021	5e-05	0.000724232	yes	Slc2a13	3.00813	6.96182	4.11078	11.5322	11.1014	11.7134
XLOC_025073	XLOC_025073	Slc2a9	5:38349272-38503143	E3KO	EfCtrl	OK	9.55773	5.41247	-0.82038	-2.0779	0.00075	0.007507	yes	Slc2a9	8.65389	8.67382	6.82086	6.04746	4.89402	4.13115
XLOC_021552	XLOC_021552	Slc31a1	4:62360726-62408642	E3KO	EfCtrl	OK	67.4879	42.202	-0.677317	-2.73988	5e-05	0.000724232	yes	Slc31a1	53.1679	59.9156	65.6214	40.7699	37.5691	44.4609
XLOC_008670	XLOC_008670	Slc35d2	13:64096309-64129330	E3KO	EfCtrl	OK	3.43546	5.2557	0.613378	1.55848	0.0062	0.0410945	yes	Slc35d2	3.14243	2.95181	2.89045	4.42074	5.38521	5.34508
XLOC_033348	XLOC_033348	Slc37a2	9:37229148-37255738	E3KO	EfCtrl	OK	4.06515	1.87886	-1.11345	-1.83822	0.00125	0.0114398	yes	Slc37a2	3.71091	3.24781	3.37813	1.82913	2.24915	1.21378
XLOC_011515	XLOC_011515	Slc38a4	15:96994822-97055956	E3KO	EfCtrl	OK	16.44	27.1819	0.725432	2.45421	5e-05	0.000724232	yes	Slc38a4	17.4248	13.296	11.4713	29.9222	22.0046	25.2283
XLOC_001155	XLOC_001155	Slc39a10	1:46807543-46854046	E3KO	EfCtrl	OK	27.5174	19.02	-0.532829	-1.6608	0.0056	0.0380159	yes	Slc39a10	23.4262	23.9618	24.5035	16.9776	19.6826	18.069
XLOC_020178	XLOC_020178	Slc39a8	3:135825278-135888572	E3KO	EfCtrl	OK	5.27925	2.63152	-1.00444	-2.58192	5e-05	0.000724232	yes	Slc39a8	6.17222	3.64105	3.76095	1.73047	3.33237	2.49092
XLOC_021474	XLOC_021474	Slc44a1	4:53440412-53622478	E3KO	EfCtrl	OK	17.5492	25.3675	0.53157	1.62583	0.00425	0.0306269	yes	Slc44a1	10.9383	18.9601	16.105	23.1194	23.2231	26.5059
XLOC_000609	XLOC_000609	Slc45a3	1:131962966-131982963	E3KO	EfCtrl	OK	34.4526	73.0937	1.08513	4.49552	5e-05	0.000724232	yes	Slc45a3	26.4087	33.2449	21.7563	69.8148	57.5416	63.3168
XLOC_018938	XLOC_018938	Slc4a11	2:130684112-130697519	E3KO	EfCtrl	OK	2.76095	0.875724	-1.65662	-2.29818	5e-05	0.000724232	yes	Slc4a11	3.07871	1.74696	2.05336	0.61931	1.10122	0.702204
XLOC_010781	XLOC_010781	Slc52a2	15:76538942-76542130	E3KO	EfCtrl	OK	2.61348	1.4421	-0.857799	-1.58547	0.00615	0.040851	yes	Slc52a2	4.02922	1.05713	1.30681	1.60277	1.32261	1.09912
XLOC_025760	XLOC_025760	Slc7a1	5:148327409-148399904	E3KO	EfCtrl	OK	6.78502	11.0576	0.704611	2.66356	5e-05	0.000724232	yes	Slc7a1	5.56654	6.57201	5.14178	10.5848	9.51642	10.8222
XLOC_020417	XLOC_020417	Slc7a11	3:50364935-50443613	E3KO	EfCtrl	OK	5.4394	1.65688	-1.71498	-5.47748	5e-05	0.000724232	yes	Slc7a11	3.59258	4.69387	6.33732	1.26625	2.27226	1.3254
XLOC_032946	XLOC_032946	Slco2a1	9:103008488-103087849	E3KO	EfCtrl	OK	7.16981	1.01499	-2.82047	-6.23815	5e-05	0.000724232	yes	Slco2a1	4.89282	4.89466	8.37818	0.539304	1.27454	0.970259
XLOC_030256	XLOC_030256	Slco2b1	7:99657803-99711340	E3KO	EfCtrl	OK	5.29778	1.94787	-1.44349	-3.64187	5e-05	0.000724232	yes	Slco2b1	4.65131	4.21248	4.68841	1.97851	1.67391	1.82175
XLOC_004244	XLOC_004244	Slfn5	11:82910549-82962941	E3KO	EfCtrl	OK	70.8235	41.0526	-0.786755	-3.10587	5e-05	0.000724232	yes	Slfn5	62.0938	70.2782	57.1272	41.5246	46.0189	37.9884
XLOC_024132	XLOC_024132	Slit2	5:47983154-48306282	E3KO	EfCtrl	OK	17.9535	4.70001	-1.93353	-3.28723	5e-05	0.000724232	yes	Slit2	22.2864	10.3427	11.6833	2.4816	5.77641	4.98579
XLOC_009726	XLOC_009726	Slitrk5	14:111675114-111683134	E3KO	EfCtrl	OK	0.73303	1.72843	1.23752	2.4238	5e-05	0.000724232	yes	Slitrk5	0.115265	0.993785	0.832231	1.45873	1.90823	1.53784
XLOC_011582	XLOC_011582	Smagp	15:100621341-100636865	E3KO	EfCtrl	OK	3.39308	12.2348	1.85033	3.53275	5e-05	0.000724232	yes	Smagp	3.53583	2.16508	2.70277	16.2376	9.8101	8.06592
XLOC_023383	XLOC_023383	Smap2	4:120968316-121017247	E3KO	EfCtrl	OK	48.3843	31.061	-0.639436	-2.61908	5e-05	0.000724232	yes	Smap2	37.502	39.8614	46.531	27.8931	25.8675	33.1344
XLOC_006568	XLOC_006568	Smoc1	12:81026807-81186414	E3KO	EfCtrl	OK	6.26616	1.08189	-2.53403	-5.57314	5e-05	0.000724232	yes	Smoc1	5.50518	4.80043	5.54014	0.738873	1.39997	0.859293
XLOC_020301	XLOC_020301	Snx16	3:10417818-10440124	E3KO	EfCtrl	OK	6.61674	3.91107	-0.758556	-2.05402	0.0003	0.00348276	yes	Snx16	10.8086	3.43746	3.04418	3.31647	3.66007	4.50893
XLOC_015927	XLOC_015927	Sorcs1	19:50143300-50778662	E3KO	EfCtrl	OK	10.6037	16.427	0.631509	2.03589	0.00035	0.00396199	yes	Sorcs1	7.73845	12.6527	9.56312	18.9673	14.3195	18.8924
XLOC_000975	XLOC_000975	Sox17	1:4490927-4496413	E3KO	EfCtrl	OK	8.29994	3.52751	-1.23445	-2.893	5e-05	0.000724232	yes	Sox17	3.67216	4.14328	6.13106	1.94787	2.51465	2.72722
XLOC_000405	XLOC_000405	Sp100	1:85600377-85709998	E3KO	EfCtrl	OK	6.41779	3.33869	-0.942795	-1.50937	0.00555	0.0377376	yes	Sp100	11.4817	3.05939	3.54851	4.06975	3.878	3.03441
XLOC_004189	XLOC_004189	Spag5	11:78301528-78322457	E3KO	EfCtrl	OK	2.47104	5.36558	1.11862	2.41142	5e-05	0.000724232	yes	Spag5	2.00908	2.09231	2.12363	5.41903	4.21529	4.32936
XLOC_017150	XLOC_017150	Spata5l1	2:122630624-122632930	E3KO	EfCtrl	OK	1.93942	4.84206	1.32	2.0116	0.00085	0.0083291	yes	Spata5l1	0.0386245	2.87785	2.12642	5.25922	3.83394	4.10172
XLOC_018271	XLOC_018271	Spc25	2:69193894-69206194	E3KO	EfCtrl	OK	7.17144	12.6413	0.817815	2.07544	0.00015	0.00192134	yes	Spc25	3.07618	8.44563	7.90168	13.2295	10.716	12.1859
XLOC_005497	XLOC_005497	Spns2	11:72441354-72489904	E3KO	EfCtrl	OK	82.8674	57.0227	-0.539268	-1.72428	0.0023	0.0187672	yes	Spns2	73.8895	65.7849	66.6328	64.1245	48.9542	45.3757
XLOC_024398	XLOC_024398	Spp1	5:104435117-104441050	E3KO	EfCtrl	OK	90.2078	57.0147	-0.661917	-2.46057	5e-05	0.000724232	yes	Spp1	58.9374	74.1174	99.2526	46.6748	62.9931	50.4746
XLOC_029535	XLOC_029535	Spred3	7:29158828-29169841	E3KO	EfCtrl	OK	26.2808	18.1121	-0.537053	-2.05022	5e-05	0.000724232	yes	Spred3	29.255	24.3699	25.6549	21.2565	21.3623	16.4903
XLOC_010706	XLOC_010706	Sqle	15:59315076-59331192	E3KO	EfCtrl	OK	19.9155	10.7746	-0.886266	-3.09852	5e-05	0.000724232	yes	Sqle	12.4162	13.9329	25.0535	10.9389	9.53	9.89435
XLOC_028908	XLOC_028908	Srcap	7:127559385-127565266	E3KO	EfCtrl	OK	6.66121	10.4711	0.652552	2.04003	0.0008	0.00791745	yes	Srcap	7.13303	8.48996	9.01283	9.56643	9.00216	9.70482
XLOC_024233	XLOC_024233	Srd5a3	5:76140270-76155504	E3KO	EfCtrl	OK	35.7331	51.8015	0.535732	1.92537	0.0006	0.0062413	yes	Srd5a3	23.8028	37.785	32.2354	48.766	45.1937	54.5369
XLOC_002942	XLOC_002942	Srgn	10:62493832-62527451	E3KO	EfCtrl	OK	12.9179	5.66425	-1.18942	-2.07094	5e-05	0.000724232	yes	Srgn	13.6261	9.17647	14.2686	5.07367	7.11105	4.04767
XLOC_024242	XLOC_024242	Srp72	5:76974682-76999937	E3KO	EfCtrl	OK	121.325	85.6123	-0.502986	-1.66448	0.00395	0.0289109	yes	Srp72	105.025	100.804	109.319	77.1953	83.422	82.714
XLOC_030470	XLOC_030470	St5	7:109523910-109617147	E3KO	EfCtrl	OK	3.44818	7.04396	1.03055	2.84741	5e-05	0.000724232	yes	St5	2.06505	3.66733	3.09942	7.14366	6.87412	5.61485
XLOC_003147	XLOC_003147	Stab2	10:86839093-87028015	E3KO	EfCtrl	OK	143.154	6.88444	-4.37809	-6.27369	5e-05	0.000724232	yes	Stab2	138.712	106.156	126.039	6.18696	6.53992	6.52341
XLOC_033891	XLOC_033891	Stac	9:111561436-111690348	E3KO	EfCtrl	OK	0.782178	1.87505	1.26136	1.9658	0.00085	0.0083291	yes	Stac	0.494068	0.98428	0.517577	2.21652	1.14707	1.81806
XLOC_005951	XLOC_005951	Stat5b	11:100780730-100850724	E3KO	EfCtrl	OK	5.67614	8.33818	0.554823	1.88776	0.00095	0.00913113	yes	Stat5b	4.5295	5.24859	5.04601	8.19185	6.73225	8.07777
XLOC_009620	XLOC_009620	Stc1	14:69029288-69041401	E3KO	EfCtrl	OK	11.0603	28.5715	1.36918	5.20244	5e-05	0.000724232	yes	Stc1	5.04152	14.1421	10.3803	28.4249	31.1907	23.4878
XLOC_024868	XLOC_024868	Steap1	5:5736316-5749326	E3KO	EfCtrl	OK	9.76467	3.53866	-1.46437	-3.07116	5e-05	0.000724232	yes	Steap1	8.75096	6.11393	10.3721	2.70932	3.94848	3.41781
XLOC_024867	XLOC_024867	Steap2	5:5664830-5694578	E3KO	EfCtrl	OK	23.8125	10.2948	-1.2098	-3.91144	5e-05	0.000724232	yes	Steap2	19.0566	18.2251	24.1101	8.25253	11.028	9.91154
XLOC_019479	XLOC_019479	Stmn2	3:8509526-8561604	E3KO	EfCtrl	OK	10.283	6.67258	-0.62395	-1.77197	0.0029	0.0226265	yes	Stmn2	4.37845	10.2079	12.0707	5.00364	8.88456	4.86645
XLOC_030798	XLOC_030798	Stxbp2	8:3630954-3643644	E3KO	EfCtrl	OK	14.153	5.26984	-1.42527	-2.09763	5e-05	0.000724232	yes	Stxbp2	19.6339	7.31446	9.81711	5.28321	6.13799	3.53923
XLOC_026481	XLOC_026481	Syn2	6:115134901-115282626	E3KO	EfCtrl	OK	9.69832	5.23657	-0.889113	-2.83312	5e-05	0.000724232	yes	Syn2	10.4218	7.25844	6.94218	5.46289	4.01717	5.27789
XLOC_002691	XLOC_002691	Syne1	10:5020202-5069063	E3KO	EfCtrl	OK	4.74757	7.89098	0.733016	2.5429	5e-05	0.000724232	yes	Syne1	2.91378	5.20212	4.04588	6.47348	7.5769	7.84696
XLOC_006534	XLOC_006534	Syne2	12:75818133-76110926	E3KO	EfCtrl	OK	1.0263	2.97503	1.53546	1.2996	0.0015	0.0132916	yes	Syne2	0.487021	1.22931	0.948886	2.65472	1.57033	4.37113
XLOC_024063	XLOC_024063	Tacc3	5:33658127-33678995	E3KO	EfCtrl	OK	12.1217	23.0312	0.925993	2.53093	5e-05	0.000724232	yes	Tacc3	9.03845	10.3279	10.9941	23.2784	18.5689	21.4098
XLOC_014834	XLOC_014834	Taf7	18:37640901-37644204	E3KO	EfCtrl	OK	3.4546	1.91501	-0.85117	-2.0304	0.0006	0.0062413	yes	Taf7	3.71288	2.53403	2.72101	1.84809	1.85025	1.81173
XLOC_024154	XLOC_024154	Tbc1d19	5:53809626-53904380	E3KO	EfCtrl	OK	11.8037	16.7606	0.505828	1.77419	0.0025	0.0200457	yes	Tbc1d19	5.71202	12.7655	13.2388	15.748	16.1326	17.0301
XLOC_035516	XLOC_035516	Tbc1d25	X:8154471-8176181	E3KO	EfCtrl	OK	2.48696	4.11704	0.727222	1.60474	0.00605	0.0403594	yes	Tbc1d25	1.3385	2.16147	2.81708	4.67759	3.28926	3.49093
XLOC_003300	XLOC_003300	Tbc1d30	10:121263823-121311189	E3KO	EfCtrl	OK	1.03629	2.62108	1.33873	3.235	5e-05	0.000724232	yes	Tbc1d30	0.516737	1.17571	1.00452	2.63283	2.06423	2.68728
XLOC_031261	XLOC_031261	Tbc1d9	8:83165080-83272934	E3KO	EfCtrl	OK	18.3982	26.991	0.552914	1.97153	0.0014	0.0125573	yes	Tbc1d9	13.3048	19.0004	14.6982	25.6465	24.5172	25.409
XLOC_012287	XLOC_012287	Tbx1	16:18581712-18586969	E3KO	EfCtrl	OK	26.904	39.4003	0.550386	1.84818	0.0017	0.0147224	yes	Tbx1	25.1753	21.5642	19.9208	35.3287	33.9325	38.8207
XLOC_026827	XLOC_026827	Tfec	6:16833380-16898441	E3KO	EfCtrl	OK	5.75646	0.974458	-2.56251	-4.67214	5e-05	0.000724232	yes	Tfec	4.28706	4.17067	6.31235	0.84904	0.958199	0.940399
XLOC_018373	XLOC_018373	Tfpi	2:84432854-84476775	E3KO	EfCtrl	OK	114.358	67.7204	-0.755896	-2.84776	5e-05	0.000724232	yes	Tfpi	101.831	94.3392	94.0628	58.004	69.2592	63.1149
XLOC_026779	XLOC_026779	Tfpi2	6:3962593-3968375	E3KO	EfCtrl	OK	224.637	49.5467	-2.18073	-9.00705	5e-05	0.000724232	yes	Tfpi2	187.183	186.213	226.027	43.4308	55.3367	46.5031
XLOC_028928	XLOC_028928	Tgfb1i1	7:128246811-128253712	E3KO	EfCtrl	OK	14.7413	22.6471	0.619465	1.9485	0.00105	0.00990498	yes	Tgfb1i1	15.9455	11.9235	9.0906	22.3571	17.7919	22.2578
XLOC_001874	XLOC_001874	Tgfb2	1:186623185-186705992	E3KO	EfCtrl	OK	11.2365	17.2995	0.62254	2.39111	0.0001	0.00134402	yes	Tgfb2	11.903	9.6146	7.66451	17.4185	15.0811	17.2899
XLOC_007218	XLOC_007218	Tgfb3	12:85824658-86079041	E3KO	EfCtrl	OK	12.0996	18.7628	0.632909	1.85592	0.00145	0.0129287	yes	Tgfb3	8.47723	11.8634	10.4673	17.3021	17.228	17.5966
XLOC_004465	XLOC_004465	Thra	11:98740637-98775333	E3KO	EfCtrl	OK	16.025	23.8796	0.575461	1.5931	0.00565	0.0382737	yes	Thra	10.3041	15.5933	13.0153	22.4738	21.4257	18.3985
XLOC_032555	XLOC_032555	Thy1	9:44043383-44048579	E3KO	EfCtrl	OK	146.497	298.466	1.02669	4.30938	5e-05	0.000724232	yes	Thy1	142.324	133.059	94.4196	374.876	209.977	254.579
XLOC_023499	XLOC_023499	Tinagl1	4:130164453-130175122	E3KO	EfCtrl	OK	38.3762	25.3188	-0.600004	-2.10462	0.0003	0.00348276	yes	Tinagl1	31.3827	28.8967	36.2806	25.8205	25.5163	18.046
XLOC_030048	XLOC_030048	Tjp1	7:65296164-65371239	E3KO	EfCtrl	OK	261.153	159.311	-0.713046	-2.03151	0.0003	0.00348276	yes	Tjp1	234.557	198.223	208.646	132.119	132.923	146.707
XLOC_031849	XLOC_031849	Tll1	8:64014769-64205993	E3KO	EfCtrl	OK	11.7534	3.17988	-1.88604	-6.31413	5e-05	0.000724232	yes	Tll1	10.2964	8.72766	11.0443	2.95225	3.27284	2.71883
XLOC_021581	XLOC_021581	Tlr4	4:66827583-66930284	E3KO	EfCtrl	OK	25.0218	12.6108	-0.988525	-3.02948	5e-05	0.000724232	yes	Tlr4	17.9772	19.7931	29.0661	9.94811	14.4355	13.057
XLOC_004350	XLOC_004350	Tmem100	11:90030347-90036508	E3KO	EfCtrl	OK	5.43719	8.2198	0.596243	1.56425	0.00635	0.041914	yes	Tmem100	5.01922	4.75613	4.28149	9.18331	4.47581	9.78276
XLOC_015660	XLOC_015660	Tmem132a	19:10839726-10869940	E3KO	EfCtrl	OK	1.38036	3.35722	1.28222	2.14558	0.0007	0.00709513	yes	Tmem132a	0.665525	1.47925	1.30312	3.84236	2.62205	2.68036
XLOC_035216	XLOC_035216	Tmem164	X:142681405-142843494	E3KO	EfCtrl	OK	61.394	35.6456	-0.784373	-2.07825	0.00265	0.0210194	yes	Tmem164	63.9368	48.1028	44.4984	35.9233	31.4608	32.6258
XLOC_032204	XLOC_032204	Tmem170	8:111864897-111876675	E3KO	EfCtrl	OK	10.3735	5.73438	-0.855196	-2.26028	0.0002	0.00245954	yes	Tmem170	14.1357	6.36181	6.10311	5.80375	5.32761	5.39506
XLOC_026091	XLOC_026091	Tmem176a	6:48841482-48845364	E3KO	EfCtrl	OK	119.308	65.2483	-0.870682	-3.39544	5e-05	0.000724232	yes	Tmem176a	103.215	91.537	104.037	62.8752	58.257	58.8322
XLOC_027008	XLOC_027008	Tmem176b	6:48833810-48841374	E3KO	EfCtrl	OK	226.472	128.888	-0.813213	-3.45002	5e-05	0.000724232	yes	Tmem176b	208.634	175.862	179.647	136.428	109.799	108.931
XLOC_000157	XLOC_000157	Tmem182	1:40805600-40855944	E3KO	EfCtrl	OK	2.35193	0.396791	-2.56739	-3.25139	5e-05	0.000724232	yes	Tmem182	4.17266	1.12957	0.662752	0.180042	0.486081	0.473551
XLOC_005595	XLOC_005595	Tmem199	11:78507054-78512172	E3KO	EfCtrl	OK	49.239	30.7521	-0.679118	-2.01562	0.0011	0.0102983	yes	Tmem199	45.4037	36.9808	42.3195	26.003	28.8347	31.2113
XLOC_007158	XLOC_007158	Tmem229b	12:78961794-79007627	E3KO	EfCtrl	OK	2.28258	3.79722	0.734276	1.7052	0.00165	0.0143734	yes	Tmem229b	0.960021	2.614	2.40911	3.92868	2.95138	4.32115
XLOC_002221	XLOC_002221	Tmem26	10:68723745-68782654	E3KO	EfCtrl	OK	12.5254	18.6265	0.572497	2.27141	5e-05	0.000724232	yes	Tmem26	7.80878	13.4145	11.9653	17.8555	15.8142	20.277
XLOC_001471	XLOC_001471	Tmem37	1:120067376-120074074	E3KO	EfCtrl	OK	3.12572	1.26358	-1.30667	-1.86877	0.0035	0.0262985	yes	Tmem37	2.85754	2.34522	2.64478	0.763775	1.50005	1.19642
XLOC_023954	XLOC_023954	Tmem60	5:20882190-20886870	E3KO	EfCtrl	OK	14.6265	22.5934	0.627316	1.74461	0.0038	0.0280514	yes	Tmem60	3.61559	17.9004	17.4038	22.3962	22.7124	19.4588
XLOC_011250	XLOC_011250	Tmem71	15:66526211-66561046	E3KO	EfCtrl	OK	2.85908	4.876	0.77015	2.02557	0.0005	0.00535591	yes	Tmem71	3.71415	2.3035	1.49255	4.34099	4.17484	5.81736
XLOC_033651	XLOC_033651	Tmod2	9:75565620-75611325	E3KO	EfCtrl	OK	9.73032	26.8399	1.46382	5.56641	5e-05	0.000724232	yes	Tmod2	7.58074	10.2018	7.57325	26.0647	23.9528	27.5461
XLOC_027716	XLOC_027716	Tmtc1	6:148232429-148444389	E3KO	EfCtrl	OK	1.96136	4.13954	1.07762	3.25158	5e-05	0.000724232	yes	Tmtc1	2.84092	1.46328	0.874512	5.20078	2.20014	4.48741
XLOC_033499	XLOC_033499	Tnfaip8l3	9:54025605-54068411	E3KO	EfCtrl	OK	6.06466	12.9156	1.09062	3.34578	5e-05	0.000724232	yes	Tnfaip8l3	4.77938	5.97292	5.08133	13.2988	11.5494	12.1691
XLOC_009628	XLOC_009628	Tnfrsf10b	14:69767471-69784403	E3KO	EfCtrl	OK	105.654	65.3852	-0.692311	-3.00154	5e-05	0.000724232	yes	Tnfrsf10b	67.6999	102.294	104.227	59.4088	63.2473	63.0641
XLOC_000534	XLOC_000534	Tnfrsf11a	1:105780722-105847981	E3KO	EfCtrl	OK	3.3033	4.86848	0.559561	1.71807	0.0024	0.0194009	yes	Tnfrsf11a	2.83605	2.9519	2.80121	5.3181	3.99157	4.63278
XLOC_030769	XLOC_030769	Tnfrsf26	7:143607684-143627845	E3KO	EfCtrl	OK	59.8399	35.6171	-0.74854	-3.14973	5e-05	0.000724232	yes	Tnfrsf26	52.6913	47.5086	56.396	32.5366	37.5753	32.6274
XLOC_019532	XLOC_019532	Tnfsf10	3:27317027-27342427	E3KO	EfCtrl	OK	0.91945	2.02658	1.1402	2.40784	0.0001	0.00134402	yes	Tnfsf10	0.361502	1.15172	0.941943	1.95367	2.18405	1.71743
XLOC_029042	XLOC_029042	Tnnt3	7:142460808-142516009	E3KO	EfCtrl	OK	5.41646	0.33289	-4.02423	-1.86445	5e-05	0.000724232	yes	Tnnt3	12.1859	0.0759667	0.217508	0.490341	0.172982	0.246761
XLOC_022805	XLOC_022805	Tomm5	4:45105207-45108114	E3KO	EfCtrl	OK	128.473	78.4382	-0.711832	-2.58844	5e-05	0.000724232	yes	Tomm5	134.344	97.2474	92.0483	76.3509	68.8202	73.7494
XLOC_005848	XLOC_005848	Top2a	11:98992942-99024189	E3KO	EfCtrl	OK	17.2877	37.3742	1.1123	2.82776	5e-05	0.000724232	yes	Top2a	17.5631	13.7992	15.6453	43.951	29.1742	39.9012
XLOC_002808	XLOC_002808	Tpd52l1	10:31332379-31445921	E3KO	EfCtrl	OK	5.91419	2.51227	-1.23519	-2.41116	0.0002	0.00245954	yes	Tpd52l1	8.23647	2.97806	3.44302	2.30639	2.27035	2.44273
XLOC_009728	XLOC_009728	Tpm3-rs7	14:113314607-113316713	E3KO	EfCtrl	OK	2.81515	1.54192	-0.868479	-1.61831	0.0047	0.0331644	yes	Tpm3-rs7	5.47008	0.699381	0.565486	1.54689	1.2212	1.50065
XLOC_024658	XLOC_024658	Tpst1	5:130073325-130135729	E3KO	EfCtrl	OK	22.5078	34.1428	0.601156	2.22485	0.00015	0.00192134	yes	Tpst1	18.9803	19.3658	19.1549	34.3956	28.037	33.293
XLOC_027373	XLOC_027373	Tpt1-ps3	6:99877746-99878433	E3KO	EfCtrl	OK	42.6765	16.1133	-1.40519	-3.47469	5e-05	0.000724232	yes	Tpt1-ps3	88.3831	6.88066	8.18933	15.8478	15.1759	14.1357
XLOC_017415	XLOC_017415	Tpx2	2:152847963-152895321	E3KO	EfCtrl	OK	11.5253	19.7051	0.773769	2.09712	0.0007	0.00709513	yes	Tpx2	10.9595	8.81617	9.27714	19.6032	16.3764	19.1573
XLOC_001048	XLOC_001048	Tram2	1:20996295-21079229	E3KO	EfCtrl	OK	5.42073	8.20732	0.598422	2.1223	0.00015	0.00192134	yes	Tram2	2.77364	5.99239	5.37658	7.88835	7.22201	8.14215
XLOC_019104	XLOC_019104	Trib3	2:152337421-152344032	E3KO	EfCtrl	OK	24.8997	37.9337	0.607354	2.22206	0.0001	0.00134402	yes	Trib3	12.1505	25.564	24.2026	38.2865	31.1673	33.6403
XLOC_027045	XLOC_027045	Tril	6:53815470-53820825	E3KO	EfCtrl	OK	5.39939	10.5497	0.96634	3.2496	5e-05	0.000724232	yes	Tril	5.1425	4.73083	3.9238	10.6162	7.55109	11.7276
XLOC_013738	XLOC_013738	Trp53cor1	17:29057473-29078961	E3KO	EfCtrl	OK	5.86073	3.95076	-0.568949	-1.60096	0.0058	0.0390723	yes	Trp53cor1	6.53971	4.0357	4.20227	3.73142	3.47271	3.85987
XLOC_007010	XLOC_007010	Tspan13	12:36014556-36042500	E3KO	EfCtrl	OK	45.9982	71.0986	0.628243	2.5666	5e-05	0.000724232	yes	Tspan13	30.0961	43.058	47.583	69.8658	61.6125	72.6966
XLOC_002937	XLOC_002937	Tspan15	10:62185395-62231218	E3KO	EfCtrl	OK	3.83367	5.85531	0.611019	1.77555	0.0024	0.0194009	yes	Tspan15	2.00335	3.92666	4.01068	5.91757	5.34325	5.27461
XLOC_021851	XLOC_021851	Ttc39a	4:109406622-109444745	E3KO	EfCtrl	OK	1.04359	2.92338	1.48608	2.08615	5e-05	0.000724232	yes	Ttc39a	0.827	1.00364	0.815562	3.45814	2.30695	2.41457
XLOC_010162	XLOC_010162	Ttc5	14:50765414-50785518	E3KO	EfCtrl	OK	14.1928	22.6399	0.673703	2.27404	0.00015	0.00192134	yes	Ttc5	5.68633	16.6174	14.1081	20.6777	19.685	21.8967
XLOC_032845	XLOC_032845	Ttk	9:83834688-83872390	E3KO	EfCtrl	OK	1.39792	4.91723	1.81456	4.23508	5e-05	0.000724232	yes	Ttk	0.633767	1.67746	1.36699	5.43202	3.83698	4.69064
XLOC_027753	XLOC_027753	Ttyh1	7:4074124-4136926	E3KO	EfCtrl	OK	5.4296	2.50662	-1.1151	-2.28387	5e-05	0.000724232	yes	Ttyh1	6.26924	4.04049	3.78255	2.75881	2.02299	2.30458
XLOC_028772	XLOC_028772	Tub	7:109010824-109083331	E3KO	EfCtrl	OK	0.883148	1.91936	1.1199	1.77933	0.0015	0.0132916	yes	Tub	0.635953	0.87526	0.747952	2.08657	1.60155	1.75243
XLOC_008482	XLOC_008482	Tubb2b	13:34127007-34130354	E3KO	EfCtrl	OK	3.67328	7.93471	1.11111	2.71684	5e-05	0.000724232	yes	Tubb2b	1.27573	4.76851	3.39488	7.74632	6.6562	7.39261
XLOC_033396	XLOC_033396	Ubash3b	9:41011097-41161697	E3KO	EfCtrl	OK	5.12703	8.1491	0.668515	1.70882	0.0018	0.0154292	yes	Ubash3b	3.38346	5.51484	4.19332	10.2006	6.23647	6.45358
XLOC_017577	XLOC_017577	Ube2c	2:164769897-164779967	E3KO	EfCtrl	OK	28.8277	61.6645	1.09698	3.21649	5e-05	0.000724232	yes	Ube2c	17.4632	27.509	29.8243	66.4386	50.9018	58.0315
XLOC_000648	XLOC_000648	Ube2t	1:134962564-134974162	E3KO	EfCtrl	OK	0.973071	4.61485	2.24566	3.15355	5e-05	0.000724232	yes	Ube2t	0.13648	1.35673	1.08237	5.13687	4.1151	3.84398
XLOC_023636	XLOC_023636	Ubxn10	4:138709836-138746132	E3KO	EfCtrl	OK	3.2031	1.17699	-1.44437	-1.97762	0.0014	0.0125573	yes	Ubxn10	5.00956	1.01575	1.86024	1.53983	0.747884	1.02497
XLOC_013338	XLOC_013338	Uhrf1	17:56303320-56323486	E3KO	EfCtrl	OK	1.37568	2.64105	0.940966	1.36754	0.0048	0.0337324	yes	Uhrf1	0.240783	1.21096	2.02322	2.77909	1.98006	2.60195
XLOC_002700	XLOC_002700	Ulbp1	10:7444872-7473477	E3KO	EfCtrl	OK	22.5486	15.3505	-0.55475	-1.90212	0.001	0.00952306	yes	Ulbp1	16.841	18.6792	22.8823	14.2952	13.9648	15.2192
XLOC_021370	XLOC_021370	Unc13b	4:43058952-43264871	E3KO	EfCtrl	OK	4.47038	6.82557	0.610553	1.73696	0.0009	0.00873141	yes	Unc13b	4.10195	3.78383	3.31869	8.04452	4.76193	6.68145
XLOC_003479	XLOC_003479	Upp1	11:9118102-9136170	E3KO	EfCtrl	OK	67.0002	45.9049	-0.545519	-1.69616	0.0036	0.0268779	yes	Upp1	51.0688	56.6089	61.498	39.9402	50.3515	37.3752
XLOC_034951	XLOC_034951	Uprt	X:104482817-104507490	E3KO	EfCtrl	OK	10.4338	6.47235	-0.688903	-2.11781	0.00035	0.00396199	yes	Uprt	5.45782	11.1136	11.1174	5.43138	6.80632	6.4509
XLOC_027212	XLOC_027212	Vamp5	6:72368048-72380468	E3KO	EfCtrl	OK	10.7271	7.28841	-0.557579	-1.59192	0.0054	0.0369354	yes	Vamp5	11.4554	6.68711	9.4089	8.1935	6.71693	5.92099
XLOC_001771	XLOC_001771	Vangl2	1:172000959-172028444	E3KO	EfCtrl	OK	1.77767	3.2989	0.892	2.21982	5e-05	0.000724232	yes	Vangl2	0.738093	2.08427	1.8118	3.19483	3.07537	3.06348
XLOC_011896	XLOC_011896	Wdr5b	16:36041189-36042973	E3KO	EfCtrl	OK	1.66586	3.11249	0.901799	1.61876	0.0075	0.0477652	yes	Wdr5b	0.138423	2.37208	1.95014	2.72418	2.9919	3.15541
XLOC_010727	XLOC_010727	Wisp1	15:66891319-66923201	E3KO	EfCtrl	OK	5.57769	3.74563	-0.574459	-1.82736	0.0015	0.0132916	yes	Wisp1	4.8387	4.81581	4.43972	2.72766	3.74612	3.93669
XLOC_009101	XLOC_009101	Wnt5a	14:28504749-28527447	E3KO	EfCtrl	OK	10.6974	5.22564	-1.03358	-2.98022	5e-05	0.000724232	yes	Wnt5a	8.80578	8.64177	10.7371	4.74437	5.69729	4.70926
XLOC_003879	XLOC_003879	Wnt9a	11:59306927-59333552	E3KO	EfCtrl	OK	1.92512	3.54706	0.881678	2.06003	0.00065	0.00667132	yes	Wnt9a	1.01283	2.07778	1.82635	3.79083	2.74768	3.32997
XLOC_014185	XLOC_014185	Xdh	17:73883907-73950182	E3KO	EfCtrl	OK	6.92176	4.3507	-0.66989	-2.21257	0.00015	0.00192134	yes	Xdh	5.49376	5.33434	6.64087	4.26841	3.99114	3.82736
XLOC_003312	XLOC_003312	Xrcc6bp1	10:126868429-126901371	E3KO	EfCtrl	OK	6.72197	2.10905	-1.67229	-2.61712	5e-05	0.000724232	yes	Xrcc6bp1	13.0914	1.71064	1.15974	2.57614	1.33603	1.96938
XLOC_008111	XLOC_008111	Zbed3	13:95325236-95337841	E3KO	EfCtrl	OK	23.1335	33.2827	0.524791	1.86168	0.00115	0.0106752	yes	Zbed3	14.0676	23.0889	22.1378	32.4585	25.0603	35.3992
XLOC_019481	XLOC_019481	Zbtb10	3:9250601-9285333	E3KO	EfCtrl	OK	2.06442	3.27528	0.665883	2.03223	0.00075	0.007507	yes	Zbtb10	1.29202	2.39981	1.84057	2.96851	3.53	3.08534
XLOC_016750	XLOC_016750	Zc3h15	2:83644434-83664622	E3KO	EfCtrl	OK	56.6839	39.6235	-0.516584	-1.74742	0.00255	0.020354	yes	Zc3h15	75.1413	41.9758	43.1123	36.2293	38.5394	40.5431
XLOC_012279	XLOC_012279	Zdhhc8	16:18220753-18235136	E3KO	EfCtrl	OK	2.2397	3.73104	0.736273	1.91397	0.00095	0.00913113	yes	Zdhhc8	1.42046	2.18337	2.04369	4.50836	3.01046	2.88272
XLOC_029456	XLOC_029456	Zfp109	7:24228047-24236632	E3KO	EfCtrl	OK	3.23549	1.50272	-1.10641	-2.02446	0.0005	0.00535591	yes	Zfp109	6.63651	0.782449	0.438162	1.49422	1.3201	1.39607
XLOC_028126	XLOC_028126	Zfp30	7:29783997-29794702	E3KO	EfCtrl	OK	1.11266	2.36848	1.08995	2.17789	0.00055	0.00580945	yes	Zfp30	0.0713529	1.58706	1.29226	2.41214	2.37961	1.87923
XLOC_029521	XLOC_029521	Zfp36	7:28376783-28379255	E3KO	EfCtrl	OK	4.87975	2.26721	-1.10589	-2.16638	0.0005	0.00535591	yes	Zfp36	4.34476	4.12083	3.99825	1.53662	2.34205	2.44498
XLOC_023472	XLOC_023472	Zfp362	4:128773087-128806045	E3KO	EfCtrl	OK	4.45106	7.44289	0.741716	2.04299	0.00055	0.00580945	yes	Zfp362	2.54334	3.72051	4.96612	6.1413	6.82807	7.08305
XLOC_008671	XLOC_008671	Zfp367	13:64133021-64153202	E3KO	EfCtrl	OK	2.45349	4.84396	0.981355	1.75164	0.0013	0.0118058	yes	Zfp367	1.5764	1.86172	2.77783	6.58854	4.11923	4.21042
XLOC_013030	XLOC_013030	Zfp472	17:32965813-32979233	E3KO	EfCtrl	OK	1.59434	3.07261	0.946508	1.99334	0.00145	0.0129287	yes	Zfp472	0.194644	1.83283	2.21353	3.11436	2.99589	2.64339
XLOC_012841	XLOC_012841	Zfp52	17:21555045-21562066	E3KO	EfCtrl	OK	18.6762	12.3371	-0.598198	-2.10516	0.00035	0.00396199	yes	Zfp52	8.8093	15.4476	25.3393	9.77406	14.3099	11.7316
XLOC_012966	XLOC_012966	Zfp523	17:28177206-28205886	E3KO	EfCtrl	OK	1.32737	2.71132	1.03043	1.66202	0.0006	0.0062413	yes	Zfp523	0.700145	1.2579	1.37619	2.69247	2.97972	2.06479
XLOC_027827	XLOC_027827	Zfp606	7:12478292-12496235	E3KO	EfCtrl	OK	1.94921	3.54374	0.862386	2.2381	0.00015	0.00192134	yes	Zfp606	1.3235	2.21004	1.73096	3.04637	3.93624	3.46008
XLOC_013784	XLOC_013784	Zfp763	17:33016862-33033402	E3KO	EfCtrl	OK	0.986065	2.80113	1.50625	3.16894	5e-05	0.000724232	yes	Zfp763	0.390973	1.48509	0.77163	3.11332	1.95762	3.0399
XLOC_018770	XLOC_018770	Zfp770	2:114193460-114201469	E3KO	EfCtrl	OK	2.84344	4.28528	0.591751	1.69412	0.0042	0.0303542	yes	Zfp770	0.569807	3.65115	3.51047	4.24491	3.9151	4.36808
XLOC_012842	XLOC_012842	Zfp948	17:21567045-21588697	E3KO	EfCtrl	OK	4.56251	2.42012	-0.91475	-2.36285	5e-05	0.000724232	yes	Zfp948	5.63489	2.80744	3.29679	2.07082	2.09438	2.75044

## Sheet: Panel A
All named genes FPKM in ECtrl ≥ 2 and < 2 if FPKM ≥ 2 in E3KO, log2 fold change ≤ -0.5 or ≥ +0.5, q < 0.05 between ECtrl, EfCtrl vs. E3KO
			Average FPKM					Fold Change vs. ECtrl					Log2 Fold Change vs. ECtrl
Gene			ECtrl	EfCtrl	E3KO			ECtrl	EfCtrl	E3KO			ECtrl	EfCtrl	E3KO
Mtap2			0.0255738	0.356945	5.22749			1	13.9574	204.408			0	3.80296	7.67531
Cnga2			0.118776	0.0578173	11.9891			1	0.486776	100.939			0	-1.03867	6.65734
Tnnt3			0.268481	0.33289	5.41646			1	1.2399	20.1745			0	0.310226	4.33446
Scgb1a1			1.07777	0.588607	19.6212			1	0.546134	18.2054			0	-0.872673	4.18629
Gnat2			0.148389	0.376725	2.66489			1	2.53877	17.9588			0	1.34413	4.16662
Stab2			8.94785	6.88444	143.154			1	0.769396	15.9987			0	-0.378202	3.99988
Serpina3g			0.411867	0.809452	5.97873			1	1.96532	14.5162			0	0.974767	3.85959
Aif1			0.289631	0.880727	4.18111			1	3.04086	14.436			0	1.60448	3.8516
Cytip			0.163065	0.423737	2.24586			1	2.59858	13.7728			0	1.37772	3.78375
Cd52			1.36984	6.19796	14.3844			1	4.52459	10.5008			0	2.17779	3.39243
Esrrb			0.392566	0.310296	3.84862			1	0.79043	9.80375			0	-0.33929	3.29333
Mir5109			6794.15	8110.88	58302.1			1	1.1938	8.58122			0	0.255565	3.10118
Mir5105			232364	137250	1863060			1	0.590668	8.01785			0	-0.75958	3.00322
Gsta3			0.614368	1.36862	4.56761			1	2.22769	7.43465			0	1.15555	2.89426
Slco2a1			0.969915	1.01499	7.16981			1	1.04647	7.3922			0	0.0655353	2.886
9230102O04Rik,Gata3			0.337478	0.369488	2.49085			1	1.09485	7.38078			0	0.130734	2.88377
Tfec			0.780293	0.974458	5.75646			1	1.24884	7.37731			0	0.320584	2.88309
Pou2f1			3.07782	3.13228	22.7051			1	1.01769	7.37701			0	0.0253043	2.88304
Prkar1b			1.13886	0.961903	8.27258			1	0.844619	7.26391			0	-0.243627	2.86075
Rps13-ps2			1.13078	1.69896	7.75061			1	1.50247	6.85422			0	0.587334	2.77699
Nmnat2			0.594643	0.68566	4.03423			1	1.15306	6.78429			0	0.20547	2.7622
Smoc1			0.965143	1.08189	6.26616			1	1.12096	6.49247			0	0.164739	2.69877
Clec4n			3.86269	8.1223	24.0878			1	2.10276	6.23602			0	1.07228	2.64062
Bgn			18.3715	28.94	114.13			1	1.57527	6.21234			0	0.655595	2.63514
Perp			3.94102	5.36104	24.3311			1	1.36032	6.17381			0	0.443944	2.62616
Mkx			0.456736	0.328206	2.76876			1	0.71859	6.06206			0	-0.476759	2.59981
Prl6a1			0.683797	0.604449	4.13895			1	0.88396	6.05289			0	-0.177947	2.59762
Lrrc55			0.760334	1.45718	4.3794			1	1.9165	5.75984			0	0.938474	2.52603
Gm6787,Psmb7-ps2			0.550304	0.289736	3.13635			1	0.526502	5.6993			0	-0.92549	2.51079
Rps24-ps3			2.90356	5.00092	16.4991			1	1.72234	5.68237			0	0.784371	2.50649
Ptgs2			2.42823	2.68701	13.7896			1	1.10657	5.67887			0	0.146097	2.5056
Apod			0.96788	0.870387	5.28701			1	0.899272	5.46246			0	-0.153171	2.44955
Il7r			0.582716	0.91105	3.16493			1	1.56345	5.43134			0	0.644737	2.44131
Psg22			7.9423	8.95678	40.9949			1	1.12773	5.16159			0	0.173423	2.36782
C3			2.18194	1.68909	11.2211			1	0.774123	5.14272			0	-0.369365	2.36253
Tfpi2			47.6961	49.5467	224.637			1	1.0388	4.70976			0	0.0549177	2.23565
Esr1			0.691053	0.562113	3.16898			1	0.813415	4.58573			0	-0.297936	2.19715
Tmem182			0.513066	0.396791	2.35193			1	0.773372	4.58407			0	-0.370765	2.19663
Aim2			3.36061	3.40922	15.2993			1	1.01446	4.55254			0	0.0207186	2.18667
Tpt1-ps3			9.50578	16.1133	42.6765			1	1.69511	4.48953			0	0.761375	2.16656
Lalba			1.00724	0.813056	4.41637			1	0.807212	4.38463			0	-0.308981	2.13245
Csf3			0.876154	0.752129	3.82199			1	0.858444	4.36224			0	-0.220204	2.12507
Slit2			4.15268	4.70001	17.9535			1	1.1318	4.32335			0	0.178621	2.11215
Efemp1			1.06298	1.86668	4.44199			1	1.75608	4.17881			0	0.81236	2.06309
Cryab			4.40392	6.23522	17.6714			1	1.41583	4.01265			0	0.501652	2.00456
Pde1a			0.62229	0.402453	2.49386			1	0.646729	4.00755			0	-0.628767	2.00272
Tll1			3.00006	3.17988	11.7534			1	1.05994	3.91772			0	0.083981	1.97001
Slc7a11			1.41257	1.65688	5.4394			1	1.17295	3.85071			0	0.230147	1.94513
Serpinb1a			1.44859	1.37625	5.5646			1	0.950062	3.84139			0	-0.0739068	1.94163
Adrb3			1.34356	1.4604	5.13197			1	1.08696	3.81968			0	0.120303	1.93345
Ccl7			10.8574	10.9201	41.1501			1	1.00577	3.79005			0	0.0083074	1.92222
Jam2			0.889163	1.08511	3.36611			1	1.22037	3.78571			0	0.287321	1.92056
Apoe			1.44001	2.17412	5.39264			1	1.5098	3.74486			0	0.594353	1.90491
Ces2e			5.08378	4.87479	18.9471			1	0.958891	3.72697			0	-0.0605615	1.898
Cacna1a			1.32128	1.17405	4.81137			1	0.88857	3.64145			0	-0.170442	1.86451
Eif4a2			166.829	151.924	599.684			1	0.910657	3.5946			0	-0.13502	1.84583
Nrg1			1.34271	1.34629	4.81174			1	1.00267	3.5836			0	0.00384147	1.84141
Crlf1			4.67277	3.68493	16.4618			1	0.788596	3.52292			0	-0.342641	1.81677
Asb4			0.987049	0.897289	3.45031			1	0.909062	3.49558			0	-0.137549	1.80553
Bst1			2.15799	2.02359	7.51323			1	0.93772	3.48159			0	-0.0927712	1.79975
Art3			1.81593	1.17135	6.30469			1	0.645041	3.47188			0	-0.632536	1.79572
Eif4a-ps4			5.56913	10.9817	19.2164			1	1.97189	3.45052			0	0.979578	1.78681
Ociad2			2.22507	3.36176	7.57723			1	1.51086	3.40539			0	0.595366	1.76782
Inhba			7.3881	7.58149	25.1557			1	1.02618	3.40489			0	0.037278	1.76761
Pdk4			3.55628	3.83364	11.9459			1	1.07799	3.3591			0	0.108346	1.74807
Ces2g			10.5578	13.1886	35.2091			1	1.24918	3.33489			0	0.320982	1.73764
Itgam			0.666609	0.946766	2.2063			1	1.42027	3.30974			0	0.506167	1.72672
Icam1			8.44437	9.95111	27.7184			1	1.17843	3.28247			0	0.236868	1.71478
Mest			262.673	267.857	853.456			1	1.01974	3.24912			0	0.0281951	1.70005
Cyp1b1			2.98414	3.81047	9.67614			1	1.27691	3.24252			0	0.352654	1.69712
Iigp1			2.02091	3.86695	6.54317			1	1.91347	3.23773			0	0.936191	1.69498
Slc4a11			0.85372	0.875724	2.76095			1	1.02577	3.23402			0	0.0367133	1.69333
Plscr2			16.4977	16.7177	52.8431			1	1.01334	3.20306			0	0.0191115	1.67945
Entpd1			32.6229	28.6154	103.692			1	0.877157	3.1785			0	-0.189093	1.66835
Itgb2			2.68821	5.74381	8.50606			1	2.13667	3.16421			0	1.09536	1.66185
Cd53			3.99651	6.09596	12.5821			1	1.52532	3.14827			0	0.609113	1.65456
Hbegf			2.45875	3.09718	7.73476			1	1.25966	3.14581			0	0.33303	1.65343
Fcgr3			2.96909	4.93173	9.29452			1	1.66102	3.13043			0	0.732073	1.64636
Mir1900,mmu-mir-1900			4.30464	4.51417	13.4741			1	1.04868	3.13013			0	0.0685682	1.64622
Cxx1c			2.80249	3.61739	8.73843			1	1.29078	3.11809			0	0.36824	1.64066
Mreg			0.757833	0.951355	2.35517			1	1.25536	3.10777			0	0.328104	1.63588
Rpl39-ps			17.2234	24.6219	52.9406			1	1.42956	3.07376			0	0.515572	1.62
Selp			29.4473	33.0849	88.0263			1	1.12353	2.98928			0	0.168038	1.5798
Cbr3			1.03912	0.890041	3.07175			1	0.856533	2.95611			0	-0.223419	1.5637
Frrs1			4.77923	5.80666	14.0484			1	1.21498	2.93947			0	0.28093	1.55556
Slc37a2			1.38528	1.87886	4.06515			1	1.3563	2.93453			0	0.43968	1.55313
Rnase1			1.86832	1.5788	5.46598			1	0.845037	2.92561			0	-0.242913	1.54874
Klra4			2.55485	2.47337	7.46163			1	0.968108	2.92057			0	-0.0467605	1.54625
Cyp51			3.95274	3.99534	11.3788			1	1.01078	2.87871			0	0.0154652	1.52542
Hmgcll1			2.63418	2.40913	7.49969			1	0.914565	2.84707			0	-0.128842	1.50948
Igfbp5			1.11015	0.846655	3.1498			1	0.762649	2.83727			0	-0.390909	1.50451
Hoxb7,Hoxb8			10.9027	12.455	30.9137			1	1.14238	2.83542			0	0.19204	1.50356
Ldhb			7.63925	9.29845	21.6271			1	1.21719	2.83105			0	0.283559	1.50134
Igf2bp3			1.42962	1.65859	4.02212			1	1.16016	2.81342			0	0.214326	1.49232
Fmn1			3.80288	5.51211	10.6292			1	1.44946	2.79504			0	0.535512	1.48287
Flt1			5.00557	5.34153	13.9806			1	1.06712	2.79301			0	0.0937187	1.48182
Mmp28			4.84065	5.0689	13.4893			1	1.04715	2.78667			0	0.0664719	1.47854
Rinl			1.03197	0.924889	2.87295			1	0.896236	2.78395			0	-0.158049	1.47713
Tpm3-rs7			1.0123	1.54192	2.81515			1	1.52318	2.78094			0	0.607091	1.47557
Pglyrp1			7.4394	6.23942	20.6271			1	0.838699	2.77268			0	-0.253774	1.47128
Ubxn10			1.15722	1.17699	3.2031			1	1.01708	2.76793			0	0.0244389	1.46881
Myo19			3.41274	3.50115	9.41727			1	1.02591	2.75945			0	0.0368984	1.46438
Lyz2			80.2114	150.642	219.823			1	1.87806	2.74055			0	0.909245	1.45446
Galnt3			3.72787	3.04195	10.1917			1	0.816002	2.73392			0	-0.293355	1.45097
Steap1			3.59792	3.53866	9.76467			1	0.983529	2.71398			0	-0.02396	1.44041
Sp100			2.37765	3.33869	6.41779			1	1.4042	2.69922			0	0.489746	1.43254
Stxbp2			5.26007	5.26984	14.153			1	1.00186	2.69065			0	0.00267716	1.42795
Atg9b			1.62744	1.93149	4.37114			1	1.18683	2.6859			0	0.24711	1.42541
Pdgfa			1.86444	2.08198	5.00146			1	1.11668	2.68255			0	0.159214	1.42361
Palmd			5.51333	6.17519	14.7482			1	1.12005	2.67501			0	0.16356	1.41954
Ctss			15.4694	26.7811	41.1817			1	1.73123	2.66214			0	0.791798	1.41259
Nnmt			14.7743	20.2426	39.1676			1	1.37012	2.65106			0	0.454305	1.40657
Ak4			1.12524	1.20376	2.96171			1	1.06978	2.63207			0	0.097315	1.3962
Xrcc6bp1			2.55925	2.10905	6.72197			1	0.824089	2.62654			0	-0.279128	1.39316
Rps6-ps4			3.45242	4.44055	9.06135			1	1.28621	2.62464			0	0.36313	1.39212
Slc39a8			2.01313	2.63152	5.27925			1	1.30718	2.62241			0	0.386456	1.39089
Adamts5			9.6488	10.0213	25.2821			1	1.03861	2.62023			0	0.0546482	1.38969
Malat1			63.9636	68.0517	167.104			1	1.06391	2.61249			0	0.0893801	1.38542
Pdk1			9.24438	9.95881	24.1152			1	1.07728	2.60863			0	0.107397	1.38329
Ano3			6.8375	8.24475	17.722			1	1.20581	2.59188			0	0.270007	1.374
Rab34			5.45096	5.24683	14.1273			1	0.962552	2.59171			0	-0.0550643	1.3739
Endou			0.819389	0.991594	2.09116			1	1.21016	2.5521			0	0.275201	1.35168
Ccl2			233.262	228.595	591.317			1	0.979992	2.53499			0	-0.0291575	1.34198
Lgals3			40.8756	52.9223	103.491			1	1.29472	2.53185			0	0.372636	1.34019
Cd68			16.4663	24.7935	41.4019			1	1.50571	2.51434			0	0.590446	1.33018
S100a1			13.388	17.421	33.6333			1	1.30124	2.5122			0	0.379887	1.32895
Rpl29			1.93796	2.05624	4.85934			1	1.06103	2.50745			0	0.0854699	1.32622
Rcbtb2			37.3933	41.2591	93.4393			1	1.10338	2.49882			0	0.141933	1.32125
Mnd1			1.73164	1.5114	4.31886			1	0.872814	2.49409			0	-0.196254	1.31851
Nipal1			1.6278	1.48633	4.03854			1	0.913091	2.48098			0	-0.131169	1.31091
Cct6a			534.744	508.336	1320.97			1	0.950616	2.47028			0	-0.073066	1.30468
Steap2			9.67705	10.2948	23.8125			1	1.06384	2.46072			0	0.0892766	1.29908
Ass1			14.5103	12.777	35.662			1	0.880547	2.4577			0	-0.183528	1.29731
Pla2g7			4.59697	7.11906	11.2754			1	1.54864	2.45279			0	0.631004	1.29442
Itgb5			1.54729	1.78392	3.7951			1	1.15293	2.45274			0	0.205307	1.29439
Hs6st2			2.46064	2.54329	5.99901			1	1.03359	2.43799			0	0.0476624	1.28569
Ms4a6d			7.02059	8.34627	17.101			1	1.18883	2.43584			0	0.249539	1.28442
Prrg4			11.6289	10.8956	28.2523			1	0.936942	2.42949			0	-0.093969	1.28065
Adamts9			1.77464	2.50191	4.30697			1	1.40981	2.42695			0	0.495504	1.27915
C1ql3			1.3543	1.48982	3.27045			1	1.10007	2.41486			0	0.137591	1.27194
Rtp4			8.23478	11.0581	19.7517			1	1.34285	2.39857			0	0.425302	1.26217
Fat1			3.83881	4.90381	9.20455			1	1.27743	2.39776			0	0.353244	1.26169
Palld			20.8578	21.6944	49.8826			1	1.04011	2.39156			0	0.0567357	1.25795
Slc24a1			2.16728	1.98541	5.1472			1	0.916084	2.37496			0	-0.126449	1.2479
Ptgfr			0.977936	0.869323	2.31072			1	0.888936	2.36285			0	-0.169848	1.24053
Zfp36			2.07318	2.26721	4.87975			1	1.09359	2.35375			0	0.129073	1.23496
Anpep			3.77286	5.26298	8.84867			1	1.39496	2.34535			0	0.480221	1.2298
Fam72a			2.54172	2.68228	5.95825			1	1.0553	2.34418			0	0.0776547	1.22908
Fam84a			2.66159	2.98884	6.2375			1	1.12295	2.34352			0	0.167297	1.22868
Serpine1			61.5256	59.8688	143.729			1	0.973071	2.33608			0	-0.0393825	1.22409
Mrpl34			14.4618	14.0973	33.4411			1	0.974796	2.31237			0	-0.0368283	1.20938
Hsd11b1			23.4135	21.8079	54.0951			1	0.931424	2.31042			0	-0.10249	1.20816
Copg2			82.9902	78.1819	191.632			1	0.942062	2.30909			0	-0.0861063	1.20733
Casp4			10.8747	12.6562	25.0189			1	1.16382	2.30065			0	0.218869	1.20204
Mpp1			231.783	254.984	532.652			1	1.1001	2.29806			0	0.137632	1.20042
Tpd52l1			2.57586	2.51227	5.91419			1	0.975313	2.29601			0	-0.0360627	1.19913
Dock8			5.79248	6.98328	13.2441			1	1.20558	2.28643			0	0.269724	1.1931
Casp1			1.83551	1.67321	4.18639			1	0.911578	2.28078			0	-0.133562	1.18953
Bambi			1.29176	1.62341	2.93774			1	1.25674	2.27422			0	0.329689	1.18537
Ripk3			11.6144	13.2205	26.4102			1	1.13829	2.27392			0	0.186862	1.18518
Exoc3l2			5.52122	6.63757	12.5185			1	1.20219	2.26734			0	0.265668	1.181
Tmem37			1.38061	1.26358	3.12572			1	0.915233	2.26401			0	-0.127789	1.17888
Lcp1			28.9221	34.8072	65.3241			1	1.20348	2.25862			0	0.267213	1.17544
B3gnt3			4.90922	5.63378	11.0695			1	1.14759	2.25484			0	0.198609	1.17302
Gsto1			91.4208	85.8595	202.815			1	0.939168	2.21848			0	-0.0905447	1.14957
Naip2			2.64104	2.8754	5.84534			1	1.08874	2.21327			0	0.122657	1.14618
Mdm2			74.8767	77.7882	165.56			1	1.03888	2.2111			0	0.0550345	1.14477
Klhl6			21.207	23.4651	46.8226			1	1.10648	2.20788			0	0.145976	1.14266
Gpx8			24.2953	29.4427	53.1608			1	1.21187	2.18811			0	0.277233	1.12969
Leprel1			1.89476	2.01375	4.14551			1	1.0628	2.18788			0	0.0878695	1.12953
Itga2			1.93484	1.95308	4.20457			1	1.00943	2.17308			0	0.0135368	1.11974
Zfp109			1.5016	1.50272	3.23549			1	1.00075	2.15469			0	0.00107566	1.10748
Esm1			43.518	39.9547	92.7331			1	0.918119	2.13091			0	-0.123247	1.09147
Slco2b1			2.48785	1.94787	5.29778			1	0.782953	2.12946			0	-0.353002	1.09049
Hist1h2ac			1.21461	1.28544	2.57609			1	1.05832	2.12092			0	0.0817691	1.08469
Liph			1.15279	0.993641	2.44329			1	0.861944	2.11946			0	-0.214333	1.0837
Reep2			2.30429	2.42891	4.88125			1	1.05408	2.11833			0	0.0759867	1.08293
Ccdc166			1.24901	1.15352	2.64385			1	0.923547	2.11676			0	-0.114742	1.08186
Cxx1b			13.9673	12.2783	29.5063			1	0.879075	2.11253			0	-0.185942	1.07897
Serpinb9b			18.5935	16.7543	39.2231			1	0.901084	2.10951			0	-0.150267	1.07691
Acer2			2.84905	2.22294	6.00684			1	0.780239	2.10837			0	-0.358012	1.07613
Fcer1g			18.0045	20.7649	37.959			1	1.15332	2.10831			0	0.205789	1.07608
Scd1			1.88844	2.35165	3.96045			1	1.24529	2.09721			0	0.316478	1.06847
Maoa			29.6872	28.7525	62.1451			1	0.968515	2.09333			0	-0.0461536	1.0658
Serpinb1b			1.33237	1.50104	2.78066			1	1.12659	2.087			0	0.171968	1.06143
Dbc1			1.55807	1.634	3.24717			1	1.04873	2.0841			0	0.0686479	1.05942
Bace2			3.21523	2.842	6.68804			1	0.883918	2.08011			0	-0.178015	1.05666
Prss16			1.9233	2.08017	3.99912			1	1.08156	2.0793			0	0.113118	1.0561
Fzd1			1.23754	1.275	2.56857			1	1.03027	2.07555			0	0.0430221	1.05349
F2rl3			5.86987	6.25808	12.1024			1	1.06614	2.06178			0	0.0923915	1.04389
Pon3			8.10751	9.7357	16.6588			1	1.20082	2.05474			0	0.264026	1.03895
Lpar6			52.5527	48.8051	107.821			1	0.928689	2.05167			0	-0.106733	1.0368
Cdh2			6.07918	7.6832	12.4628			1	1.26385	2.05008			0	0.337831	1.03568
Edn1			94.653	96.2349	193.523			1	1.01671	2.04455			0	0.023912	1.03178
Gp49a,Lilrb4			7.92642	10.1875	16.2041			1	1.28526	2.04432			0	0.362059	1.03162
Plxdc2			1.74502	1.99822	3.54006			1	1.1451	2.02866			0	0.195472	1.02053
Il4ra			4.18142	4.93205	8.4731			1	1.17952	2.02637			0	0.238194	1.0189
Spp1			44.7926	57.0147	90.2078			1	1.27286	2.0139			0	0.348074	1.00999
Gpr143			3.28871	3.93921	6.59836			1	1.1978	2.00637			0	0.260385	1.00459
Mttp			1.24782	1.21072	2.49745			1	0.970268	2.00145			0	-0.0435446	1.00105
Abcg2			38.5082	31.6936	76.9702			1	0.823035	1.9988			0	-0.280974	0.999134
Pcyt1b			1.07394	1.24803	2.14037			1	1.1621	1.99301			0	0.216739	0.994947
Slc2a9			4.80128	5.41247	9.55773			1	1.1273	1.99066			0	0.172868	0.993249
Mmd			61.8837	62.4357	123.073			1	1.00892	1.98878			0	0.0128117	0.991883
Csf1			28.4152	30.1647	56.4234			1	1.06157	1.98568			0	0.0861984	0.989631
Plin2			72.4896	78.8669	143.928			1	1.08798	1.9855			0	0.121646	0.989501
Cd28			1.08864	0.926285	2.15713			1	0.850864	1.98149			0	-0.232999	0.986586
Abcc9			2.27663	2.97028	4.50679			1	1.30468	1.97959			0	0.383699	0.9852
Nptx1			3.3538	2.41487	6.63436			1	0.72004	1.97816			0	-0.473851	0.984161
Wisp1			2.82154	3.74563	5.57769			1	1.32751	1.97682			0	0.408726	0.983185
Eif1a			30.597	28.9512	60.1736			1	0.94621	1.96665			0	-0.0797671	0.97574
Clca5			39.1942	42.5993	76.9613			1	1.08688	1.96359			0	0.12019	0.973493
Gbp3			8.39128	9.41684	16.4588			1	1.12222	1.96142			0	0.166352	0.971896
Fam101b			19.4123	15.7787	38.0393			1	0.81282	1.95955			0	-0.298993	0.97052
Rerg			5.44932	5.23421	10.6344			1	0.960525	1.95151			0	-0.0581044	0.964591
Mum1l1			2.26687	2.06337	4.41851			1	0.910229	1.94917			0	-0.135699	0.962858
Rasl11b			2.99989	3.04485	5.82348			1	1.01499	1.94123			0	0.0214616	0.956972
Ctgf			165.301	152.082	320.051			1	0.920031	1.93617			0	-0.120246	0.953206
Clca1			11.1638	12.1837	21.5269			1	1.09136	1.92828			0	0.126124	0.947312
Srgn			6.70545	5.66425	12.9179			1	0.844723	1.92648			0	-0.243449	0.945965
Axl			5.76615	7.34478	11.0848			1	1.27378	1.92239			0	0.349111	0.942902
Chmp4c			1.491	1.41045	2.86106			1	0.945976	1.91889			0	-0.0801247	0.940269
Apoo			4.55939	3.95434	8.7201			1	0.867296	1.91256			0	-0.205404	0.935504
Hmox1			300.638	299.422	574.597			1	0.995955	1.91126			0	-0.00584715	0.934523
Lax1			2.85311	3.06045	5.44976			1	1.07267	1.91011			0	0.101208	0.933657
Npr1			39.9715	38.9462	75.5763			1	0.974349	1.89075			0	-0.0374891	0.918962
Igf2r			11.2524	12.3697	21.2481			1	1.09929	1.88832			0	0.136578	0.917101
Mxra8			169.455	175.464	319.901			1	1.03546	1.88782			0	0.0502729	0.916723
Hyal1,Hyal3,Nat6			5.31513	5.47031	10.0121			1	1.0292	1.8837			0	0.0415176	0.913568
Pex10			1.92452	1.21875	3.61669			1	0.633275	1.87927			0	-0.659096	0.910171
Ces2b			2.02764	1.70281	3.80575			1	0.839799	1.87694			0	-0.251884	0.908379
Ifrd1			28.0936	28.5279	52.7177			1	1.01546	1.8765			0	0.022132	0.908046
Ncoa4			6.87353	6.87031	12.8479			1	0.999532	1.86919			0	-0.000676009	0.902409
Idi1			4.00305	2.84299	7.45455			1	0.710206	1.86222			0	-0.493691	0.897022
Chst2			7.25983	8.10375	13.5139			1	1.11625	1.86146			0	0.158654	0.896436
Tmem170			5.58273	5.73438	10.3735			1	1.02716	1.85814			0	0.0386667	0.89386
Rnf144b			5.50798	5.83029	10.2058			1	1.05852	1.85291			0	0.0820443	0.889794
Tlr4			13.5121	12.6108	25.0218			1	0.933297	1.85181			0	-0.0995921	0.888934
Rgs2			12.0102	7.60809	22.179			1	0.633469	1.84668			0	-0.658654	0.884934
Slc52a2			1.41738	1.4421	2.61348			1	1.01744	1.84388			0	0.0249446	0.882746
Vamp5			5.84653	7.28841	10.7271			1	1.24662	1.83478			0	0.318023	0.875608
Ccng1			111.434	123.516	204.191			1	1.10842	1.83239			0	0.148508	0.87373
Pmaip1			11.0694	12.5715	20.2616			1	1.1357	1.83042			0	0.18358	0.872171
Igfbp3			57.4879	53.752	105.166			1	0.935014	1.82936			0	-0.0969399	0.871338
Hspb8			8.15028	9.0162	14.9033			1	1.10624	1.82856			0	0.14567	0.87071
Bcam			2.22834	2.32068	4.06795			1	1.04144	1.82555			0	0.0585782	0.868333
Golm1			4.04433	4.73966	7.3798			1	1.17193	1.82473			0	0.228883	0.867681
Ctla2b			320.765	328.795	585.078			1	1.02503	1.82401			0	0.0356716	0.867112
Efhc1			1.51578	1.48337	2.75798			1	0.978618	1.81951			0	-0.0311819	0.863552
Ctsh			80.0388	81.9453	145.241			1	1.02382	1.81463			0	0.0339617	0.859677
Cdkn1a			203.841	202.581	369.465			1	0.993819	1.81252			0	-0.00894539	0.857993
Car5b			3.80962	3.42861	6.90059			1	0.899987	1.81136			0	-0.152023	0.857073
Cdk18			7.95301	8.66658	14.3858			1	1.08972	1.80885			0	0.123962	0.855073
Agl			5.67278	6.72246	10.2401			1	1.18504	1.80513			0	0.244933	0.852102
Tmem176b			125.468	128.888	226.472			1	1.02726	1.80502			0	0.0387985	0.852013
Pycr1			1.76209	1.64336	3.1762			1	0.93262	1.80252			0	-0.100639	0.850014
Sox17			4.61349	3.52751	8.29994			1	0.764608	1.79906			0	-0.387208	0.847242
Tmem176a			66.3902	65.2483	119.308			1	0.9828	1.79707			0	-0.02503	0.845649
Ttyh1			3.02356	2.50662	5.4296			1	0.829029	1.79576			0	-0.270505	0.844598
Clec14a			17.0451	16.5661	30.5858			1	0.971898	1.7944			0	-0.0411231	0.843505
Pole			23.7493	23.0071	42.5955			1	0.968749	1.79355			0	-0.0458058	0.842816
Dtnb			6.14751	5.83756	11.0147			1	0.949581	1.79173			0	-0.0746367	0.841356
Mtdh			64.9772	66.3692	116.414			1	1.02142	1.79161			0	0.0305803	0.841259
Snx16			3.69426	3.91107	6.61674			1	1.05869	1.79109			0	0.082278	0.840835
Kif1a			1.34533	1.54226	2.40014			1	1.14638	1.78405			0	0.197086	0.835158
Fam115c			1.90262	1.86108	3.36169			1	0.978167	1.76687			0	-0.0318474	0.821199
Nus1			55.6382	56.6567	98.1508			1	1.01831	1.76409			0	0.0261708	0.818924
Cdkn2b			65.7193	72.3326	115.715			1	1.10063	1.76075			0	0.138329	0.816187
Sqle			11.3259	10.7746	19.9155			1	0.951324	1.7584			0	-0.0719914	0.814266
Cgnl1			65.5221	72.6589	114.779			1	1.10892	1.75176			0	0.149158	0.808805
Hcls1			7.07806	7.05649	12.3743			1	0.996953	1.74826			0	-0.00440325	0.805921
Pik3r3			30.375	32.5498	53.0178			1	1.0716	1.74544			0	0.0997643	0.803592
Esd			236.85	232.779	413.163			1	0.982812	1.74441			0	-0.0250128	0.802737
Wnt5a			6.13678	5.22564	10.6974			1	0.851528	1.74316			0	-0.231874	0.801706
Heph			3.38178	3.24067	5.84362			1	0.958273	1.72797			0	-0.0614907	0.78908
Tomm5			74.5599	78.4382	128.473			1	1.05202	1.72308			0	0.0731565	0.784993
Atp8a1			4.02021	4.12965	6.92211			1	1.02722	1.72183			0	0.0387487	0.783941
Mboat7			10.217	10.1996	17.5654			1	0.998297	1.71923			0	-0.00245907	0.781765
Taf7			2.01145	1.91501	3.4546			1	0.952054	1.71747			0	-0.070884	0.780283
Tjp1			152.447	159.311	261.153			1	1.04503	1.71307			0	0.0635381	0.776588
Klhl26			7.11251	7.06445	12.1616			1	0.993243	1.70989			0	-0.00978153	0.773902
Dzip1			4.48813	4.66779	7.67087			1	1.04003	1.70915			0	0.0566252	0.773276
Srcap			7.41212	10.4711	12.663			1	1.4127	1.70842			0	0.498455	0.772661
Slc25a33			3.50351	3.535	5.98415			1	1.00899	1.70804			0	0.0129092	0.772345
Acpp			4.83063	5.04884	8.24896			1	1.04517	1.70764			0	0.0637406	0.772001
Serpinb6b			33.4583	35.39	57.1128			1	1.05773	1.70698			0	0.0809776	0.77145
Insig1			24.3313	25.9614	41.3062			1	1.067	1.69766			0	0.0935548	0.763545
Tfpi			67.4305	67.7204	114.358			1	1.0043	1.69594			0	0.0061892	0.762084
Tinagl1			22.6529	25.3188	38.3762			1	1.11768	1.6941			0	0.160513	0.760516
Trp53cor1			3.46121	3.95076	5.86073			1	1.14144	1.69326			0	0.190854	0.759804
Papss2			1.55923	1.18033	2.63319			1	0.756995	1.68878			0	-0.401643	0.755978
Nid1			135.55	136.112	228.863			1	1.00415	1.6884			0	0.00596915	0.755659
Slfn5			41.9951	41.0526	70.8235			1	0.977557	1.68647			0	-0.0327474	0.754007
Helz			7.2072	8.41735	12.1347			1	1.16791	1.68369			0	0.223927	0.751628
Cd34			282.354	281.17	475.133			1	0.995807	1.68276			0	-0.0060624	0.750826
Ednrb			78.1514	63.2763	131.397			1	0.809663	1.68131			0	-0.304606	0.749589
Mcee			22.3586	22.5177	37.5808			1	1.00712	1.68082			0	0.0102296	0.749166
Morc4			24.7678	27.5802	41.6196			1	1.11355	1.68039			0	0.155167	0.748797
Maml3			1.9553	1.93449	3.28482			1	0.989357	1.67996			0	-0.0154367	0.748424
Gstm2			12.2232	13.9292	20.5207			1	1.13957	1.67883			0	0.18849	0.747458
Cd36			15.9663	18.1748	26.7593			1	1.13832	1.67599			0	0.186909	0.74501
Ifitm3			381.284	435.591	637.662			1	1.14243	1.67241			0	0.192108	0.741926
Pdrg1			54.7476	57.9233	91.4851			1	1.05801	1.67103			0	0.0813481	0.740741
Gdf11			2.28094	2.24565	3.80715			1	0.984528	1.66911			0	-0.0224954	0.739083
Hmga2			46.3959	46.5812	77.3854			1	1.00399	1.66794			0	0.00575049	0.738064
Pcdh12			20.5311	21.8346	34.2239			1	1.06349	1.66693			0	0.0888052	0.737193
Sipa1l2			6.77887	7.29287	11.2803			1	1.07582	1.66404			0	0.105442	0.734689
Anxa3			46.2928	44.885	77.025			1	0.969589	1.66387			0	-0.0445544	0.734539
Slc31a1			40.6202	42.202	67.4879			1	1.03894	1.66144			0	0.055114	0.732432
Rai14			27.8431	26.5647	46.242			1	0.954086	1.66081			0	-0.0678094	0.731884
Car8			12.8348	13.4885	21.2089			1	1.05093	1.65245			0	0.0716691	0.724609
Apln			140.296	114.155	231.649			1	0.813673	1.65114			0	-0.29748	0.723467
Tmem164			37.2072	35.6456	61.394			1	0.95803	1.65006			0	-0.0618578	0.722516
Emcn			1059.78	1021.02	1743.82			1	0.963426	1.64545			0	-0.0537537	0.718486
Inpp5d			18.9732	20.2118	31.1456			1	1.06528	1.64156			0	0.0912348	0.715065
Mocos			7.14615	7.63222	11.7288			1	1.06802	1.64128			0	0.0949366	0.714817
Chst7			6.71614	6.58808	11.0099			1	0.980932	1.63932			0	-0.0277742	0.713097
Dhcr24			4.49336	4.75181	7.34546			1	1.05752	1.63474			0	0.0806825	0.709058
Bloc1s3			15.0948	16.1256	24.6072			1	1.06829	1.63018			0	0.0953012	0.705029
Ifi204			9.95909	11.4581	16.2305			1	1.15052	1.62972			0	0.202282	0.704622
Tnfrsf26			36.7687	35.6171	59.8399			1	0.96868	1.62747			0	-0.0459081	0.70263
Ecm1			64.0744	72.8923	103.973			1	1.13762	1.62269			0	0.186018	0.698389
Prcp			87.3424	94.7232	141.609			1	1.0845	1.62131			0	0.117036	0.697159
Nucb2			17.2659	17.9445	27.9908			1	1.0393	1.62116			0	0.0556162	0.697027
Lpin1			7.21247	7.01255	11.6873			1	0.972281	1.62043			0	-0.0405543	0.696376
Shroom2			18.9129	19.5449	30.6383			1	1.03342	1.61997			0	0.0474216	0.695966
Fam110c			14.6711	12.4077	23.6727			1	0.845724	1.61356			0	-0.241741	0.690247
Ccdc126			5.01899	4.96292	8.09139			1	0.988828	1.61216			0	-0.0162079	0.68899
Pfn2			24.3886	24.7155	39.298			1	1.0134	1.61133			0	0.0192091	0.688249
Ctla2a			1054.41	1085.05	1697.38			1	1.02906	1.60979			0	0.0413256	0.686874
Eef1e1			12.9683	10.4051	20.8636			1	0.802349	1.60882			0	-0.317699	0.685999
Odc1			167.642	161.403	269.289			1	0.962784	1.60633			0	-0.0547162	0.683772
Cx3cl1			2.73203	2.30917	4.38327			1	0.845221	1.6044			0	-0.242599	0.682034
Sema6d			8.37059	8.68135	13.4018			1	1.03713	1.60106			0	0.0525901	0.679026
Adcy9			4.37704	4.76879	6.98547			1	1.0895	1.59593			0	0.123668	0.674402
Syn2			6.08187	5.23657	9.69832			1	0.861013	1.59463			0	-0.215893	0.67322
Pparg			12.2064	11.7604	19.4548			1	0.963462	1.59382			0	-0.0537006	0.672488
Tnfrsf10b			66.3834	65.3852	105.654			1	0.984963	1.59157			0	-0.0218584	0.670453
Pim1			17.3426	15.6047	27.5583			1	0.89979	1.58905			0	-0.15234	0.668167
Bcar3			2.21481	1.93108	3.50305			1	0.871894	1.58165			0	-0.197775	0.661429
Cdc42ep3			7.88193	6.81626	12.4572			1	0.864796	1.58048			0	-0.209569	0.660359
Mageh1			12.899	13.7784	20.336			1	1.06818	1.57656			0	0.0951491	0.656777
Ier5			28.6302	27.1473	45.1134			1	0.948205	1.57573			0	-0.076729	0.656018
Naa16			8.18684	7.4694	12.8954			1	0.912367	1.57514			0	-0.132314	0.655478
Isca1			5.99677	6.21289	9.4381			1	1.03604	1.57386			0	0.0510789	0.654311
Tmem199			31.4215	30.7521	49.239			1	0.978696	1.56705			0	-0.0310671	0.648049
Decr1			4.46135	4.23307	6.98178			1	0.948832	1.56495			0	-0.075776	0.646115
Pcdh1			24.8762	27.1599	38.8396			1	1.0918	1.56132			0	0.126712	0.642762
Itpripl2			77.8233	77.2437	121.498			1	0.992552	1.5612			0	-0.0107849	0.642659
Cyr61			40.5725	36.9393	63.3257			1	0.910452	1.5608			0	-0.135346	0.642289
Prps2			19.8724	18.6982	30.9908			1	0.940913	1.55949			0	-0.0878667	0.641074
Cd55			52.9987	52.3868	82.6498			1	0.988454	1.55947			0	-0.0167536	0.641054
Sc4mol			21.4061	19.6638	33.2917			1	0.918607	1.55524			0	-0.12248	0.637141
Dapk2			25.1612	27.0353	39.0956			1	1.07448	1.55381			0	0.103644	0.635806
Xdh			4.45479	4.3507	6.92176			1	0.976634	1.55378			0	-0.0341099	0.635781
Erich1			8.05734	7.17017	12.5155			1	0.889893	1.5533			0	-0.168296	0.63534
Zfp948			2.93799	2.42012	4.56251			1	0.823733	1.55294			0	-0.279751	0.634998
Smap2			31.2094	31.061	48.3843			1	0.995245	1.55031			0	-0.00687634	0.632558
Neurl3			12.009	11.8722	18.5979			1	0.988609	1.54866			0	-0.0165287	0.631024
Itga1			4.82793	5.05835	7.46743			1	1.04773	1.54671			0	0.0672621	0.629207
Pkm			249.406	261.019	385.622			1	1.04656	1.54616			0	0.0656587	0.628691
Gfpt1			12.8118	13.0732	19.8087			1	1.0204	1.54613			0	0.0291391	0.628661
Atp6v0a1			48.0545	50.2244	74.2801			1	1.04515	1.54575			0	0.0637169	0.628304
Slc23a2			23.6014	23.2542	36.4428			1	0.985289	1.54409			0	-0.0213811	0.626761
Camk2n1			12.0676	12.6673	18.6062			1	1.0497	1.54183			0	0.0699703	0.624645
Akr1b10			12.9632	12.345	19.9729			1	0.952311	1.54074			0	-0.0704951	0.623622
Slc12a2			21.0419	21.0518	32.41			1	1.00047	1.54026			0	0.000678614	0.623174
Loxl4			15.9156	16.4596	24.4984			1	1.03418	1.53927			0	0.0484877	0.622246
Pmp22			13.8932	12.7305	21.3775			1	0.916312	1.5387			0	-0.12609	0.621714
Armcx4			6.33195	6.27174	9.7403			1	0.990491	1.53828			0	-0.0137841	0.621316
Pter			24.5879	24.9137	37.8193			1	1.01325	1.53813			0	0.0189908	0.621174
Arntl			8.35271	8.61398	12.7838			1	1.03128	1.5305			0	0.0444356	0.614
Ccbp2			18.3653	18.1533	28.101			1	0.988456	1.53011			0	-0.0167506	0.613639
Abcc4			4.15731	4.23589	6.33916			1	1.0189	1.52482			0	0.0270148	0.608641
Ctps			29.5109	25.8017	44.8549			1	0.874311	1.51994			0	-0.193782	0.604018
Rapgef5			19.1967	18.6497	29.1244			1	0.971506	1.51716			0	-0.0417059	0.60137
Fitm2			5.66164	5.99674	8.56927			1	1.05919	1.51357			0	0.0829584	0.597952
Prex2			16.2892	16.6785	24.6278			1	1.0239	1.51191			0	0.0340738	0.596372
Rc3h1			17.1498	16.845	25.9124			1	0.982227	1.51094			0	-0.0258713	0.595451
Notch4			42.7878	43.4477	64.6362			1	1.01542	1.51062			0	0.0220803	0.595143
Nfkbiz			5.58952	5.65151	8.43068			1	1.01109	1.5083			0	0.015912	0.592925
Eed			22.2434	23.4277	33.5231			1	1.05324	1.5071			0	0.074838	0.591778
Uprt			6.92562	6.47235	10.4338			1	0.934552	1.50655			0	-0.0976536	0.59125
Ada			16.0241	16.5553	24.1369			1	1.03315	1.50629			0	0.0470498	0.590997
Ahcyl1			51.9451	52.2235	78.1927			1	1.00536	1.5053			0	0.00771148	0.590046
Mak16			42.4429	43.4434	63.7187			1	1.02357	1.50128			0	0.0336138	0.586194
Fkbp7			40.1788	39.5381	60.2977			1	0.984054	1.50073			0	-0.0231909	0.585668
Man2a1			37.9585	40.0461	56.8767			1	1.055	1.49839			0	0.0772388	0.583415
Mef2a			44.442	45.1908	66.5757			1	1.01685	1.49804			0	0.0241054	0.583072
Stmn2			6.86721	6.67258	10.283			1	0.971658	1.49741			0	-0.0414794	0.582465
Zc3h15			37.8589	39.6235	56.6839			1	1.04661	1.49724			0	0.0657238	0.582307
Fth1			4454.31	4398.5	6657.49			1	0.987471	1.49462			0	-0.0181904	0.579776
Slc39a10			18.4123	19.02	27.5174			1	1.03301	1.49451			0	0.0468474	0.579674
Kctd12b			42.2605	41.2248	62.9038			1	0.975492	1.48848			0	-0.0357973	0.573837
Hilpda			41.075	38.171	61.0944			1	0.9293	1.48739			0	-0.105784	0.57278
Procr			168.313	160.816	250.332			1	0.955458	1.4873			0	-0.0657357	0.572696
Adamts1			11.0989	10.4199	16.5012			1	0.938823	1.48674			0	-0.0910753	0.572154
Maged1			172.991	170.213	257.109			1	0.983941	1.48626			0	-0.0233558	0.571683
Bmp4			43.2918	42.8209	64.2916			1	0.989123	1.48508			0	-0.0157787	0.570536
Prdx6			145.539	138.39	215.904			1	0.950879	1.48348			0	-0.0726661	0.568984
Spred3			17.753	18.1121	26.2808			1	1.02023	1.48036			0	0.028891	0.565946
Il13ra1			6.24903	6.4178	9.24229			1	1.02701	1.479			0	0.0384466	0.564618
Ankrd49			7.99925	7.56842	11.7586			1	0.946141	1.46996			0	-0.0798726	0.55578
Marcksl1			269.463	260.476	395.654			1	0.966648	1.46831			0	-0.0489367	0.554152
Fut8			13.5429	13.2626	19.8794			1	0.979303	1.46788			0	-0.0301731	0.553738
Srp72			82.7363	85.6123	121.325			1	1.03476	1.46641			0	0.0492976	0.552285
Spns2			56.6474	57.0227	82.8674			1	1.00663	1.46286			0	0.00952661	0.548795
Gtf2e2			28.4901	27.4114	41.6178			1	0.962138	1.46078			0	-0.0556847	0.54674
Zfp52			12.8764	12.3371	18.6762			1	0.958117	1.45042			0	-0.061726	0.536472
Ammecr1			6.82453	6.77404	9.89841			1	0.992602	1.45042			0	-0.0107132	0.536467
Ulbp1			15.5606	15.3505	22.5486			1	0.986498	1.44908			0	-0.019612	0.53514
Mrc1			5.53178	5.29045	8.00262			1	0.956374	1.44666			0	-0.0643533	0.532729
Pcdh17			1.43766	1.35762	2.07804			1	0.944326	1.44543			0	-0.0826428	0.531501
Aqp1			613.275	597.138	885.593			1	0.973687	1.44404			0	-0.0384698	0.53011
Cd59a			44.1878	44.708	63.7943			1	1.01177	1.44371			0	0.0168849	0.529779
Upp1			46.5658	45.9049	67.0002			1	0.985807	1.43883			0	-0.0206226	0.524895
Raph1			41.6128	40.7923	59.8573			1	0.980283	1.43843			0	-0.0287305	0.5245
Slc16a1			3.14443	2.75284	4.52211			1	0.875466	1.43813			0	-0.191878	0.524198
Sarnp			25.7375	24.5595	36.6076			1	0.95423	1.42234			0	-0.0675907	0.508271
Fst			9.55565	7.94226	13.5597			1	0.831159	1.41902			0	-0.266804	0.504899
Elovl6			2.97704	2.59217	4.21051			1	0.870721	1.41433			0	-0.199718	0.500116
Agtrap			27.0306	27.6322	19.0699			1	1.02226	0.705493			0	0.0317569	-0.503296
Clasp2			11.8099	11.806	8.32445			1	0.99967	0.70487			0	-0.000476502	-0.50457
Epb4.9			31.1504	31.2758	21.9535			1	1.00403	0.704758			0	0.0057961	-0.5048
Tbc1d19			16.8271	16.7606	11.8037			1	0.996048	0.70147			0	-0.00571277	-0.511547
Tgfb1i1			21.0778	22.6471	14.7413			1	1.07445	0.699376			0	0.103602	-0.515861
Stat5b			8.15533	8.33818	5.67614			1	1.02242	0.696004			0	0.0319893	-0.522833
Itih5			6.41564	7.62939	4.44058			1	1.18919	0.692149			0	0.249975	-0.530845
Zbed3			33.6305	33.2827	23.1335			1	0.989658	0.687873			0	-0.0149978	-0.539787
Bmp6			17.5452	17.4063	12.0668			1	0.992083	0.687755			0	-0.0114668	-0.540033
H2-K1			125.049	126.282	85.983			1	1.00986	0.687594			0	0.0141555	-0.54037
Plat			56.9273	57.6314	39.1063			1	1.01237	0.686952			0	0.0177344	-0.54172
Cdh13			118.493	123.435	81.2724			1	1.04171	0.685884			0	0.0589497	-0.543964
Syne1			6.93115	7.89098	4.74757			1	1.13848	0.684961			0	0.18711	-0.545905
Srd5a3			52.211	51.8015	35.7331			1	0.992157	0.684398			0	-0.0113599	-0.547093
Dusp16			8.10047	8.45893	5.53381			1	1.04425	0.683147			0	0.0624696	-0.549733
Notch2			12.994	14.7068	8.86538			1	1.13181	0.682267			0	0.178638	-0.551591
Enpp3			8.66238	9.30114	5.88311			1	1.07374	0.679156			0	0.102644	-0.558184
Tpst1			33.1814	34.1428	22.5078			1	1.02897	0.678326			0	0.0412066	-0.55995
Mcm3			17.1801	16.5833	11.6059			1	0.965262	0.675543			0	-0.0510073	-0.56588
Zfp770			4.22793	4.28528	2.84344			1	1.01356	0.672537			0	0.019438	-0.572314
Slc16a2			8.00166	9.27511	5.37731			1	1.15915	0.672024			0	0.213065	-0.573415
Sh3pxd2b			25.509	30.1193	17.102			1	1.18073	0.67043			0	0.239682	-0.576841
Ptprn			11.6833	14.2754	7.81563			1	1.22186	0.668957			0	0.289083	-0.580014
Birc5			33.928	33.0045	22.6515			1	0.972781	0.667634			0	-0.0398136	-0.58287
Arhgef3			16.5342	16.2349	11.0275			1	0.981898	0.666951			0	-0.0263547	-0.584347
Jund			16.0531	16.2816	10.7053			1	1.01423	0.666868			0	0.0203906	-0.584527
Acsl1			10.7307	12.1599	7.13282			1	1.13319	0.664712			0	0.180387	-0.5892
Pgf			244.557	249.334	162.295			1	1.01953	0.663629			0	0.0279089	-0.591552
Cav1			713.081	675.328	473.012			1	0.947057	0.663336			0	-0.0784776	-0.592189
Rnf125			38.6546	36.5939	25.6185			1	0.946689	0.662754			0	-0.0790369	-0.593454
Hnrnpa1			116.692	115.549	77.2415			1	0.990205	0.661926			0	-0.0142009	-0.595258
Tspan15			5.79405	5.85531	3.83367			1	1.01057	0.661656			0	0.0151734	-0.595846
Prim2			7.07293	7.3607	4.67756			1	1.04069	0.661333			0	0.057535	-0.596552
Daglb			14.9712	16.7399	9.88388			1	1.11814	0.660193			0	0.161101	-0.59904
Gpatch1			5.04271	4.86238	3.32359			1	0.964239	0.659088			0	-0.0525366	-0.601457
Zfp362			6.77489	7.44289	4.45106			1	1.0986	0.656994			0	0.135665	-0.606049
Kif20b			4.87755	5.4138	3.20284			1	1.10994	0.656649			0	0.150485	-0.606805
Mapre2			23.571	21.9211	15.4578			1	0.930003	0.655797			0	-0.104693	-0.608678
Farp1			17.8432	18.1294	11.695			1	1.01604	0.655432			0	0.0229568	-0.609483
Ttc5			21.6564	22.6399	14.1928			1	1.04541	0.655363			0	0.0640741	-0.609634
Hexb			100.656	95.3729	65.9579			1	0.947513	0.65528			0	-0.0777819	-0.609816
Nfix			6.55811	6.41623	4.29298			1	0.978366	0.654606			0	-0.0315542	-0.611301
Anxa6			101.261	95.0448	66.2795			1	0.938612	0.654541			0	-0.091399	-0.611444
Tnfrsf11a			5.04733	4.86848	3.3033			1	0.964565	0.654465			0	-0.052049	-0.611612
Rcan1			51.2139	49.3368	33.4818			1	0.963348	0.653764			0	-0.0538713	-0.613158
Ncapg2			4.05292	3.9425	2.64922			1	0.972755	0.653657			0	-0.0398509	-0.613394
Diap3			7.01499	7.02025	4.58196			1	1.00075	0.653167			0	0.00108136	-0.614476
Mansc1			23.1307	22.0704	15.0606			1	0.95416	0.651109			0	-0.0676961	-0.61903
Thra			24.7656	23.8796	16.025			1	0.964225	0.647067			0	-0.0525589	-0.628013
Ptpn21			4.91216	4.57102	3.16735			1	0.930552	0.644798			0	-0.103841	-0.633081
Rps6ka4			11.0601	10.6276	7.11686			1	0.960895	0.643472			0	-0.0575486	-0.636052
Dtd1			12.5601	12.3153	8.07514			1	0.98051	0.64292			0	-0.0283962	-0.637289
Slc35d2			5.3568	5.2557	3.43546			1	0.981127	0.641327			0	-0.0274885	-0.640868
Zdhhc8			3.51624	3.73104	2.2397			1	1.06109	0.636959			0	0.0855443	-0.650728
Mapk9			50.398	47.8051	32.068			1	0.948552	0.636295			0	-0.0762019	-0.652232
Tmem26			19.7095	18.6265	12.5254			1	0.945052	0.635501			0	-0.0815346	-0.654035
Rab3il1			25.5509	26.8676	16.2282			1	1.05153	0.635132			0	0.0724933	-0.654871
Slc7a1			10.6875	11.0576	6.78502			1	1.03463	0.634856			0	0.0491139	-0.655499
Dennd2a			8.06118	8.23788	5.10651			1	1.02192	0.633469			0	0.0312821	-0.658653
Tram2			8.56579	8.20732	5.42073			1	0.958151	0.632835			0	-0.0616751	-0.660099
Pcna			14.0749	13.7614	8.90421			1	0.977726	0.63263			0	-0.0324974	-0.660565
Slc44a1			27.7684	25.3675	17.5492			1	0.913538	0.631985			0	-0.130463	-0.662039
Sdpr			159.308	144.318	100.674			1	0.905906	0.631946			0	-0.142567	-0.662128
Tgfb3			19.2718	18.7628	12.0996			1	0.973588	0.62784			0	-0.0386162	-0.671532
Ezh2			13.1735	12.0432	8.26162			1	0.914199	0.627139			0	-0.12942	-0.673142
Nln			13.9609	12.8138	8.74683			1	0.917835	0.626523			0	-0.123694	-0.67456
Antxr1			41.1225	37.8822	25.7261			1	0.921204	0.625597			0	-0.118408	-0.676695
Itpkb			14.4828	13.829	9.05827			1	0.954857	0.62545			0	-0.0666437	-0.677033
Pex2			9.04195	9.03729	5.65433			1	0.999485	0.625344			0	-0.000743721	-0.677278
Fgf12			7.79285	7.44057	4.86984			1	0.954794	0.624911			0	-0.0667379	-0.678277
Pou6f1			6.31552	5.67969	3.93994			1	0.899323	0.62385			0	-0.153089	-0.680728
Tbx1			43.1369	39.4003	26.904			1	0.913378	0.623689			0	-0.130716	-0.681102
Lrch2			11.9057	11.7994	7.42049			1	0.991072	0.623272			0	-0.0129389	-0.682066
Arrdc3			81.8518	75.1648	50.8937			1	0.918304	0.621779			0	-0.122957	-0.685527
Kif20a			14.5035	14.6747	8.99496			1	1.0118	0.620192			0	0.0169299	-0.689212
Zfp606			3.14985	3.54374	1.94921			1	1.12505	0.618826			0	0.16999	-0.692394
Herc6			2.01671	2.36705	1.24174			1	1.17372	0.615726			0	0.231087	-0.699641
Ksr1			3.00256	2.93949	1.84573			1	0.978995	0.614719			0	-0.0306272	-0.702002
Tbc1d9			29.9324	26.991	18.3982			1	0.901732	0.614658			0	-0.14923	-0.702143
Tgfb2			18.288	17.2995	11.2365			1	0.945948	0.614419			0	-0.080167	-0.702705
Phf6			27.815	24.8666	16.9586			1	0.894	0.609693			0	-0.161654	-0.713846
Arhgef10			8.2124	7.86171	5.00514			1	0.957298	0.609461			0	-0.0629608	-0.714393
Asb13			6.21534	6.55467	3.78397			1	1.0546	0.608811			0	0.0766898	-0.715933
Serpine2			103.156	105.911	62.7462			1	1.02671	0.608265			0	0.0380247	-0.717228
Trib3			40.9772	37.9337	24.8997			1	0.925727	0.607648			0	-0.111341	-0.718693
Exosc7			10.2903	10.2036	6.24588			1	0.991575	0.606968			0	-0.0122068	-0.720308
Tmem60			24.1075	22.5934	14.6265			1	0.937194	0.60672			0	-0.0935807	-0.720897
Nfatc1			67.2223	64.9119	40.7531			1	0.96563	0.606244			0	-0.0504569	-0.72203
Igsf3			6.38808	6.3227	3.84722			1	0.989765	0.60225			0	-0.0148416	-0.731566
Sorcs1			17.6234	16.427	10.6037			1	0.932113	0.601683			0	-0.101423	-0.732925
Otud1			8.52558	7.71231	5.12179			1	0.904608	0.600756			0	-0.144635	-0.73515
H2-M3			5.90215	6.11297	3.54494			1	1.03572	0.600618			0	0.0506329	-0.735479
Pdlim7			31.5784	31.957	18.9492			1	1.01199	0.600068			0	0.0171939	-0.736801
RP24-170A20.3			4.25561	4.1804	2.5418			1	0.982327	0.597282			0	-0.025725	-0.743515
Pdzd2			2.76746	2.45339	1.64987			1	0.886513	0.596168			0	-0.173786	-0.74621
Gprc5b			80.2922	81.5303	47.7922			1	1.01542	0.595228			0	0.0220765	-0.748485
Ccdc99			3.83764	3.95408	2.27889			1	1.03034	0.593826			0	0.0431227	-0.751888
Eef2k			8.65795	8.09875	5.14106			1	0.935412	0.593796			0	-0.0963262	-0.75196
Ncs1			8.77737	8.53985	5.20829			1	0.97294	0.593377			0	-0.039578	-0.752979
Pot1b			2.52682	2.66781	1.49404			1	1.0558	0.591273			0	0.078333	-0.758104
Lmnb1			17.9308	15.5036	10.5518			1	0.864635	0.588473			0	-0.209837	-0.764951
Fancb			4.4628	4.25742	2.61974			1	0.95398	0.587017			0	-0.0679697	-0.768526
Hmmr			8.05796	8.36098	4.72773			1	1.03761	0.586715			0	0.0532574	-0.769267
Kbtbd11			18.4225	19.6345	10.8062			1	1.06579	0.586576			0	0.091922	-0.76961
Cenpa			49.4357	42.3102	28.8661			1	0.855863	0.583912			0	-0.224548	-0.776177
Melk			4.36277	3.87668	2.52736			1	0.888582	0.579302			0	-0.170423	-0.787613
Tmem71			4.93829	4.876	2.85908			1	0.987386	0.578962			0	-0.0183134	-0.788461
Zbtb10			3.572	3.27528	2.06442			1	0.916932	0.577945			0	-0.125114	-0.790996
Dll4			9.39339	8.242	5.42706			1	0.877426	0.577753			0	-0.188651	-0.791475
Cyp39a1			5.25724	5.42628	3.03274			1	1.03215	0.576869			0	0.0456579	-0.793684
Adarb1			20.979	21.689	12.1006			1	1.03384	0.576796			0	0.0480176	-0.793867
Dusp3			61.9029	56.2678	35.702			1	0.908969	0.576742			0	-0.137697	-0.794002
Acadm			37.7916	33.4305	21.7488			1	0.884601	0.575493			0	-0.176901	-0.79713
Tmem100			9.46881	8.2198	5.43719			1	0.868092	0.574221			0	-0.20408	-0.800322
Sesn1			25.6685	21.7381	14.7309			1	0.846878	0.57389			0	-0.239773	-0.801153
Pgm5			39.138	39.3083	22.4325			1	1.00435	0.573164			0	0.00626394	-0.80298
Reep1			32.2114	30.5262	18.4471			1	0.947683	0.572689			0	-0.0775234	-0.804177
Rspo3			4.64484	4.23434	2.64124			1	0.911622	0.56864			0	-0.133492	-0.814414
Ptgfrn			24.2109	22.5844	13.72			1	0.93282	0.566687			0	-0.10033	-0.819376
Hmgb2			6.77909	5.91127	3.84025			1	0.871986	0.566485			0	-0.197624	-0.819891
Cryz			18.3904	18.7481	10.4173			1	1.01945	0.566453			0	0.0277915	-0.819971
Cldn5			240.764	240.813	136.146			1	1.0002	0.565475			0	0.000293586	-0.822465
Cenpe			6.95662	7.30418	3.9306			1	1.04996	0.565016			0	0.0703358	-0.823637
Pdp2			2.71749	2.76117	1.5352			1	1.01607	0.564933			0	0.023005	-0.823848
Plekhg3			3.89966	4.05903	2.19436			1	1.04087	0.562705			0	0.0577867	-0.829548
Pkia			12.7486	10.5945	7.15928			1	0.831032	0.561574			0	-0.267023	-0.832452
Ndc80			11.3048	9.74785	6.34016			1	0.862275	0.560838			0	-0.21378	-0.834344
Wnt9a			3.44517	3.54706	1.92512			1	1.02957	0.558788			0	0.0420486	-0.839627
Prox1			141.35	139.117	78.8761			1	0.984202	0.55802			0	-0.0229732	-0.841612
Palm			10.4263	12.127	5.81751			1	1.16312	0.557965			0	0.217995	-0.841754
Slc38a4			29.4933	27.1819	16.44			1	0.92163	0.557415			0	-0.117741	-0.843177
Vangl2			3.19475	3.2989	1.77767			1	1.0326	0.556435			0	0.046282	-0.845716
Racgap1			20.5269	18.6126	11.394			1	0.906742	0.555077			0	-0.141236	-0.849241
Aldh5a1			2.26177	2.15109	1.25294			1	0.951065	0.553964			0	-0.0723843	-0.852135
Prkcz			28.4925	28.1489	15.7822			1	0.987941	0.553907			0	-0.0175037	-0.852284
Ebpl			7.24313	6.15044	4.00664			1	0.849141	0.553164			0	-0.235924	-0.85422
Ank2			8.90566	9.63694	4.91445			1	1.08211	0.551834			0	0.113853	-0.857693
Ubash3b			9.29669	8.1491	5.12703			1	0.876559	0.55149			0	-0.190076	-0.858594
Tmem229b			4.14178	3.79722	2.28258			1	0.916809	0.551111			0	-0.125307	-0.859585
Cdkn3			13.0205	12.4292	7.17083			1	0.954587	0.550734			0	-0.0670514	-0.860573
Sema3a			84.0209	82.0614	46.2374			1	0.976678	0.550308			0	-0.0340445	-0.861688
Lfng			5.5632	5.35219	3.06102			1	0.96207	0.550226			0	-0.0557856	-0.861903
Cep57l1			3.70598	3.80977	2.03054			1	1.02801	0.547909			0	0.0398488	-0.867992
Tspan13			84.1392	71.0986	45.9982			1	0.845012	0.546692			0	-0.242957	-0.871201
Mpdz			30.5213	26.1349	16.664			1	0.856284	0.545979			0	-0.223839	-0.873082
Chaf1b			5.28084	4.86519	2.87981			1	0.921291	0.545332			0	-0.118271	-0.874794
Eif5a2			10.0348	8.61752	5.46953			1	0.858764	0.545056			0	-0.219667	-0.875523
Bub1			8.23461	7.93687	4.4799			1	0.963843	0.544033			0	-0.0531301	-0.878234
Ctdspl			21.3095	19.0407	11.5716			1	0.893531	0.543025			0	-0.16241	-0.880908
Ccdc82			8.05178	7.06533	4.35564			1	0.877487	0.540954			0	-0.188551	-0.886423
Nrxn2			8.40873	8.33767	4.54532			1	0.991549	0.540548			0	-0.0122436	-0.887506
Tpx2			21.3217	19.7051	11.5253			1	0.924181	0.540543			0	-0.113753	-0.887518
Klf11			8.65679	7.9686	4.67162			1	0.920503	0.539648			0	-0.119506	-0.889909
H2afz			89.6741	91.5971	48.3629			1	1.02144	0.539318			0	0.0306106	-0.890791
Celsr1			5.3157	6.41436	2.86505			1	1.20668	0.538979			0	0.271046	-0.891699
Cdk1			65.1263	60.0989	35.0575			1	0.922805	0.5383			0	-0.115902	-0.893517
Aurka			17.3221	13.9613	9.27543			1	0.805982	0.535468			0	-0.311181	-0.901128
Cntln			5.10279	4.81672	2.72674			1	0.943939	0.534363			0	-0.0832352	-0.904109
Rnaseh2b			21.2839	18.6437	11.3354			1	0.875953	0.532581			0	-0.191074	-0.908927
Map3k4			8.16748	8.42651	4.34008			1	1.03171	0.531385			0	0.0450442	-0.912169
Cplx2			7.88787	8.48542	4.18466			1	1.07576	0.530518			0	0.10535	-0.914525
Ltbp1			8.46938	9.59416	4.48648			1	1.13281	0.529729			0	0.1799	-0.916672
Mall			44.4853	42.6713	23.5581			1	0.959222	0.52957			0	-0.0600626	-0.917105
Cenpi			4.4288	4.46991	2.34478			1	1.00928	0.529439			0	0.0133299	-0.917463
Cxadr			18.4339	16.7487	9.75167			1	0.908581	0.529007			0	-0.138312	-0.91864
Pxdc1			21.6062	20.9935	11.4295			1	0.971642	0.528992			0	-0.0415026	-0.918683
Ndufb4			9.9337	9.77472	5.2502			1	0.983996	0.528524			0	-0.0232758	-0.919959
Cbx2			4.07735	3.42139	2.15436			1	0.839121	0.528373			0	-0.253049	-0.920372
Nes			12.3076	12.1324	6.49305			1	0.985765	0.527564			0	-0.0206845	-0.922581
Mettl13			4.95669	4.54173	2.61			1	0.916283	0.526561			0	-0.126135	-0.925327
Zfp523			2.52575	2.71132	1.32737			1	1.07347	0.525535			0	0.102284	-0.928141
Cib2			3.7593	3.89815	1.97526			1	1.03694	0.525433			0	0.0523256	-0.928421
Pcbp3			9.64245	10.121	5.05046			1	1.04963	0.523774			0	0.0698802	-0.932985
Tril			10.3259	10.5497	5.39939			1	1.02167	0.522898			0	0.0309344	-0.935399
Lysmd2			24.672	22.9648	12.8755			1	0.930804	0.521867			0	-0.10345	-0.938246
Gen1			2.05596	2.22339	1.0706			1	1.08144	0.52073			0	0.112949	-0.941393
Ckap2l			8.8355	9.23351	4.58207			1	1.04505	0.518598			0	0.0635674	-0.947312
Dlgap5			10.8007	10.625	5.59361			1	0.983733	0.517893			0	-0.023662	-0.949273
Cyp4b1			28.3929	26.6976	14.649			1	0.940291	0.515939			0	-0.0888202	-0.954728
Olfml2b			3.03795	3.29119	1.56736			1	1.08336	0.515927			0	0.115511	-0.954762
Ccdc48			9.14563	8.46332	4.71795			1	0.925395	0.515869			0	-0.111859	-0.954922
Mgll			52.1564	51.3046	26.831			1	0.983668	0.514434			0	-0.0237561	-0.958943
Ephb1			25.0959	26.4289	12.8337			1	1.05312	0.511386			0	0.0746647	-0.967515
Dock10			2.82836	3.33866	1.4416			1	1.18042	0.509695			0	0.239303	-0.972295
Col15a1			7.26933	7.26455	3.69263			1	0.999342	0.507974			0	-0.000948966	-0.977174
Hdac4			3.66575	3.48195	1.86126			1	0.94986	0.507743			0	-0.0742129	-0.977829
Rab6b			4.5065	3.60906	2.28806			1	0.800857	0.507724			0	-0.320384	-0.977883
Sigirr			5.02633	4.3813	2.54779			1	0.87167	0.506889			0	-0.198146	-0.980259
Hmgb3			6.12322	6.10496	3.10264			1	0.997018	0.506701			0	-0.00430868	-0.980794
Anln			14.581	13.0962	7.38707			1	0.898169	0.506623			0	-0.154941	-0.981016
Mki67			8.44385	9.06138	4.26997			1	1.07313	0.50569			0	0.10183	-0.983675
Idh2			29.4887	23.2424	14.9094			1	0.78818	0.505597			0	-0.343403	-0.98394
Blm			2.06585	1.90568	1.0439			1	0.922468	0.505313			0	-0.11643	-0.984752
Arhgap42			8.72372	9.83132	4.3997			1	1.12696	0.504338			0	0.172442	-0.987538
Wdr5b			3.30799	3.11249	1.66586			1	0.940901	0.503587			0	-0.0878857	-0.989688
Bora			3.03133	3.22207	1.52582			1	1.06292	0.50335			0	0.0880369	-0.990366
Spc25			14.3082	12.6413	7.17144			1	0.8835	0.501212			0	-0.178697	-0.996507
Mtss1l			6.93457	6.3204	3.4726			1	0.911434	0.500766			0	-0.133791	-0.99779
Fam83d			8.4116	9.24739	4.20117			1	1.09936	0.49945			0	0.136666	-1.00159
Cxcl17			5.30175	5.46765	2.64788			1	1.03129	0.499435			0	0.0444523	-1.00163
Apba2			6.60055	6.21448	3.29653			1	0.941509	0.499433			0	-0.0869526	-1.00164
Plscr4			15.2768	13.6782	7.62576			1	0.895358	0.499173			0	-0.159464	-1.00239
Cdca5			6.44929	5.72415	3.2149			1	0.887563	0.498489			0	-0.172079	-1.00437
Podxl			40.3453	37.4946	20.0962			1	0.929342	0.498105			0	-0.105718	-1.00548
Nlrc3			3.74159	3.51847	1.86329			1	0.940368	0.497994			0	-0.0887033	-1.0058
Aspm			3.56345	4.09678	1.77074			1	1.14967	0.496917			0	0.201216	-1.00892
Tbc1d25			5.01145	4.11704	2.48696			1	0.821527	0.496256			0	-0.283621	-1.01084
Ntn1			3.32035	3.12332	1.64694			1	0.94066	0.496014			0	-0.0882549	-1.01155
Ccnf			5.74003	6.05865	2.84496			1	1.05551	0.495635			0	0.0779381	-1.01265
Dach1			2.43947	2.14837	1.20707			1	0.880671	0.494808			0	-0.183325	-1.01506
Crmp1			33.4809	30.5223	16.5575			1	0.911633	0.494536			0	-0.133475	-1.01585
Unc13b			9.0547	6.82557	4.47038			1	0.753815	0.493708			0	-0.407717	-1.01827
Mcm5			5.67604	5.68304	2.80145			1	1.00123	0.493557			0	0.00177811	-1.01871
Rpa3			17.7642	20.6301	8.76334			1	1.16133	0.493315			0	0.215778	-1.01942
Cenpl			5.08225	4.89768	2.50071			1	0.963683	0.492048			0	-0.0533688	-1.02313
Foxp2			8.75471	9.40774	4.30518			1	1.07459	0.491756			0	0.103789	-1.02399
Klf2			26.0934	23.0317	12.809			1	0.882664	0.49089			0	-0.180064	-1.02653
Rnf150			2.57438	2.51752	1.26292			1	0.977913	0.490572			0	-0.0322218	-1.02746
Thy1			299.724	298.466	146.497			1	0.995803	0.488773			0	-0.00606802	-1.03276
Rab3d			5.81802	5.13022	2.82518			1	0.881781	0.485591			0	-0.181508	-1.04219
Cadps2			3.60554	3.21227	1.74738			1	0.890926	0.484638			0	-0.166622	-1.04502
Fbn1			8.91398	10.1577	4.31526			1	1.13952	0.4841			0	0.188432	-1.04662
Lrfn3			2.64939	2.37218	1.28216			1	0.895368	0.483945			0	-0.159447	-1.04708
Gjc1			14.9618	12.9183	7.22429			1	0.863419	0.482849			0	-0.211868	-1.05036
Pld5			7.65698	7.3894	3.66371			1	0.965054	0.47848			0	-0.0513183	-1.06347
Nsl1			2.69191	2.70236	1.28766			1	1.00388	0.478344			0	0.0055897	-1.06388
Ercc6l			2.42173	2.528	1.15643			1	1.04388	0.477522			0	0.0619584	-1.06636
Nsg1			47.6518	46.8531	22.6662			1	0.983239	0.475663			0	-0.0243862	-1.07199
Ispd			3.11563	2.73152	1.47571			1	0.876715	0.473647			0	-0.18982	-1.07811
Ncapd2			12.3148	11.9797	5.81655			1	0.972789	0.472322			0	-0.0398014	-1.08216
Aunip			2.54629	2.59166	1.19869			1	1.01782	0.470759			0	0.0254797	-1.08694
Mex3b			3.0602	2.8022	1.42496			1	0.915692	0.465643			0	-0.127066	-1.1027
Gp1bb,Sept5			6.36067	5.59656	2.95369			1	0.87987	0.464368			0	-0.184638	-1.10666
Csrp2			18.214	19.3706	8.45782			1	1.0635	0.464358			0	0.0888209	-1.10669
H2afx			11.5426	10.2248	5.35038			1	0.885832	0.463533			0	-0.174896	-1.10925
Fam189a2			13.2009	12.5009	6.11562			1	0.946973	0.463273			0	-0.0786043	-1.11007
Serpinb11			14.0295	12.8448	6.4741			1	0.915557	0.461463			0	-0.127279	-1.11571
Lyplal1			5.37834	5.07735	2.46479			1	0.944037	0.458281			0	-0.0830852	-1.1257
Nek2			9.7355	8.21999	4.44465			1	0.844332	0.45654			0	-0.244118	-1.13119
Prr11			8.15336	8.59013	3.71065			1	1.05357	0.455107			0	0.0752852	-1.13572
Ocln			4.91845	4.3078	2.23033			1	0.875845	0.453462			0	-0.191252	-1.14095
Il27ra			3.87678	3.16726	1.75598			1	0.816982	0.452948			0	-0.291624	-1.14258
Acta2			14.3486	27.2354	6.49473			1	1.89812	0.452639			0	0.924573	-1.14357
Fam189b			4.09139	4.09925	1.85169			1	1.00192	0.452582			0	0.00276891	-1.14375
Rnaseh1			5.11284	4.21485	2.31282			1	0.824366	0.452355			0	-0.278644	-1.14447
Napepld			3.96324	3.49123	1.7884			1	0.880903	0.451247			0	-0.182945	-1.14801
Spata5l1			4.31332	4.84206	1.93942			1	1.12258	0.449635			0	0.166822	-1.15317
Fbln1			3.43775	3.84132	1.54414			1	1.11739	0.449172			0	0.160138	-1.15466
Shcbp1			7.0537	6.09162	3.16594			1	0.863606	0.448834			0	-0.211554	-1.15575
Ampd3			59.9625	61.7284	26.8591			1	1.02945	0.447932			0	0.0418739	-1.15865
Ccnb1			7.69809	7.35052	3.43857			1	0.95485	0.446678			0	-0.0666542	-1.16269
Tubb2b			8.37944	7.93471	3.67328			1	0.946926	0.438368			0	-0.0786763	-1.18978
Pole2			4.67611	4.2045	2.04271			1	0.899145	0.43684			0	-0.153375	-1.19482
Kbtbd3			2.06359	1.77646	0.901264			1	0.860859	0.436746			0	-0.216151	-1.19513
Chchd5			5.33281	5.3324	2.32669			1	0.999923	0.436297			0	-0.000110922	-1.19662
Tnfaip8l3			13.9129	12.9156	6.06466			1	0.928318	0.435902			0	-0.107309	-1.19792
Ccdc112			2.28068	2.31202	0.993775			1	1.01374	0.435736			0	0.0196898	-1.19847
Zfp30			2.56237	2.36848	1.11266			1	0.924332	0.434231			0	-0.113517	-1.20347
Gadd45b			6.88615	8.07079	2.98348			1	1.17203	0.433258			0	0.229012	-1.2067
Nek3			4.38694	3.72626	1.89358			1	0.849398	0.43164			0	-0.235487	-1.2121
Pacsin3			3.56114	3.38945	1.53509			1	0.951788	0.431067			0	-0.071288	-1.21402
Ebf3			3.67252	3.61536	1.5768			1	0.984436	0.429351			0	-0.022631	-1.21977
Zfp367			5.71581	4.84396	2.45349			1	0.847467	0.429246			0	-0.238771	-1.22012
Fam134b			17.8827	17.3495	7.65177			1	0.970183	0.427887			0	-0.0436705	-1.2247
Cftr			3.58132	3.57461	1.53188			1	0.998126	0.427742			0	-0.00270558	-1.22519
Tacc3			28.3826	23.0312	12.1217			1	0.811455	0.427082			0	-0.301417	-1.22741
Uhrf1			3.22613	2.64105	1.37568			1	0.818643	0.426418			0	-0.288693	-1.22966
Spag5			5.81812	5.36558	2.47104			1	0.922219	0.424715			0	-0.116819	-1.23543
Kif15			2.661	3.01865	1.12524			1	1.1344	0.422864			0	0.181935	-1.24174
Zfp472			3.7767	3.07261	1.59434			1	0.81357	0.422152			0	-0.297662	-1.24417
Ccnb2			31.8339	30.5587	13.4378			1	0.959942	0.422122			0	-0.0589807	-1.24427
Top2a			40.9923	37.3742	17.2877			1	0.911737	0.42173			0	-0.13331	-1.24561
Hk2			6.46262	5.53193	2.70631			1	0.855989	0.418764			0	-0.224336	-1.25579
Kif11			12.0894	10.223	5.05078			1	0.845617	0.417786			0	-0.241924	-1.25916
Tmtc1			4.69777	4.13954	1.96136			1	0.881171	0.417509			0	-0.182506	-1.26012
Nusap1			16.6112	13.2988	6.92753			1	0.800592	0.41704			0	-0.32086	-1.26174
Slc25a35			4.46648	4.34778	1.85923			1	0.973424	0.416263			0	-0.0388594	-1.26443
Tbc1d30			2.48979	2.62108	1.03629			1	1.05273	0.416216			0	0.0741373	-1.2646
Ccna2			29.0429	23.5689	12.0317			1	0.81152	0.414273			0	-0.301301	-1.27135
Apbb1			2.38829	2.15075	0.987823			1	0.90054	0.413611			0	-0.151138	-1.27365
Slc2a13			12.7107	11.7185	5.23985			1	0.92194	0.412239			0	-0.117256	-1.27845
St5			8.41533	7.04396	3.44818			1	0.837039	0.40975			0	-0.256633	-1.28718
Prkcdbp			20.0552	18.5314	8.19732			1	0.92402	0.408738			0	-0.114004	-1.29075
Slc45a3			85.6415	73.0937	34.4526			1	0.853485	0.402289			0	-0.228563	-1.3137
Cdkn2c			8.6827	7.85933	3.45617			1	0.905171	0.398052			0	-0.143737	-1.32897
Ube2c			72.4813	61.6645	28.8277			1	0.850764	0.397726			0	-0.233169	-1.33015
Il15ra			7.13739	5.31323	2.8293			1	0.744422	0.396405			0	-0.425807	-1.33495
Casp12			9.6449	9.03198	3.81427			1	0.936451	0.39547			0	-0.094724	-1.33836
Nuf2			11.1994	10.9063	4.41949			1	0.973829	0.394618			0	-0.0382597	-1.34147
Pik3ip1			10.9313	10.484	4.27977			1	0.959081	0.391515			0	-0.0602757	-1.35286
Ptprs			2.10035	2.26785	0.82199			1	1.07975	0.391359			0	0.110695	-1.35344
Cenpn			5.47132	5.26793	2.12283			1	0.962826	0.387992			0	-0.0546528	-1.3659
Dixdc1			4.82933	3.72229	1.87357			1	0.770767	0.387957			0	-0.375633	-1.36603
Syne2			2.65961	2.97503	1.0263			1	1.1186	0.385884			0	0.16169	-1.37376
Cd300lg			5.27485	3.60821	1.98805			1	0.68404	0.376892			0	-0.547847	-1.40778
Zfp763			2.61774	2.80113	0.986065			1	1.07006	0.376686			0	0.0976871	-1.40857
Pmf1			8.24436	8.31529	3.10401			1	1.0086	0.376501			0	0.0123591	-1.40927
Tnfsf10			2.45364	2.02658	0.91945			1	0.825948	0.374729			0	-0.275876	-1.41608
Dusp9			3.13887	3.15561	1.17433			1	1.00533	0.374125			0	0.00767364	-1.41841
Tmem132a			3.69403	3.35722	1.38036			1	0.908823	0.373673			0	-0.137929	-1.42015
Ptprf			5.96183	5.30365	2.22118			1	0.889601	0.372567			0	-0.16877	-1.42443
Neil3			4.1346	4.54991	1.539			1	1.10045	0.372225			0	0.13809	-1.42575
Tub			2.39036	1.91936	0.883148			1	0.802959	0.369462			0	-0.316603	-1.4365
Fkbp1b			9.3996	7.50412	3.41955			1	0.798345	0.363797			0	-0.324916	-1.45879
Fam64a			11.9623	9.45147	4.34853			1	0.790105	0.36352			0	-0.339884	-1.4599
Bean1			8.87254	8.03701	3.21844			1	0.90583	0.362742			0	-0.142688	-1.46299
Khdrbs2			5.69394	7.10985	2.05851			1	1.24867	0.361526			0	0.320392	-1.46783
Arhgef39			3.14712	3.39764	1.13724			1	1.0796	0.361359			0	0.110501	-1.4685
Prim1			9.31997	8.2635	3.36348			1	0.886644	0.36089			0	-0.173572	-1.47037
Iqgap3			2.81109	2.54471	1.00446			1	0.90524	0.35732			0	-0.143628	-1.48471
Prc1			30.0754	25.8785	10.7329			1	0.860454	0.356866			0	-0.21683	-1.48654
Ska3			5.43905	4.29579	1.94094			1	0.789805	0.356853			0	-0.340431	-1.4866
Ifrd2			2.76158	2.118	0.985084			1	0.766952	0.35671			0	-0.382791	-1.48718
Hey1			8.67412	5.7047	3.08153			1	0.657669	0.355256			0	-0.604566	-1.49307
Stac			2.20675	1.87505	0.782178			1	0.849688	0.354448			0	-0.234994	-1.49635
Arhgef26			2.95384	2.71422	1.04232			1	0.918878	0.352869			0	-0.122054	-1.50279
Cenpf			5.16531	7.05558	1.80381			1	1.36595	0.349216			0	0.44991	-1.51781
Kif22			13.7435	12.4311	4.77393			1	0.904508	0.347359			0	-0.144795	-1.5255
Asf1b			6.85102	5.48337	2.37707			1	0.800373	0.346966			0	-0.321256	-1.52713
Fam167a			3.25816	2.74587	1.12106			1	0.842767	0.344078			0	-0.246794	-1.53919
Plk1			7.79033	8.33595	2.6558			1	1.07004	0.34091			0	0.0976622	-1.55254
Tmod2			28.6052	26.8399	9.73032			1	0.938287	0.340159			0	-0.0918981	-1.55572
Cdca7			3.7357	3.41314	1.25398			1	0.913655	0.335675			0	-0.130279	-1.57486
Cep55			12.5048	9.75637	4.17463			1	0.78021	0.333842			0	-0.358066	-1.58276
Celf2			14.4066	13.3275	4.75556			1	0.925097	0.330096			0	-0.112324	-1.59904
Pnck			2.29699	1.69551	0.756045			1	0.738144	0.329146			0	-0.438025	-1.6032
Ttc39a			3.18659	2.92338	1.04359			1	0.917401	0.327494			0	-0.124376	-1.61046
Cdca3			17.1167	13.1181	5.60316			1	0.766392	0.32735			0	-0.383846	-1.61109
Plce1			7.39432	7.42927	2.39318			1	1.00473	0.323651			0	0.00680298	-1.62749
Fhl1			125.816	112.879	40.3612			1	0.897175	0.320795			0	-0.156538	-1.64027
Fignl1			6.4231	5.96028	2.0541			1	0.927944	0.319799			0	-0.10789	-1.64476
Slitrk5			2.29535	1.72843	0.73303			1	0.753014	0.319354			0	-0.409252	-1.64677
Kif2c			10.5038	9.4705	3.23239			1	0.901626	0.307735			0	-0.149399	-1.70024
Stc1			36.5654	28.5715	11.0603			1	0.781381	0.30248			0	-0.355902	-1.72509
F2rl1			43.0477	41.3817	12.9518			1	0.961299	0.300871			0	-0.0569432	-1.73278
Ttk			4.65523	4.91723	1.39792			1	1.05628	0.30029			0	0.0789934	-1.73557
Npy			48.9709	32.6896	14.6587			1	0.667531	0.299335			0	-0.583093	-1.74017
Cdca2			7.01791	5.53279	2.09565			1	0.788381	0.298615			0	-0.343034	-1.74364
Dkk2			13.6117	11.3969	4.04548			1	0.837287	0.297206			0	-0.256206	-1.75046
Fndc4			2.6617	2.32298	0.782884			1	0.872743	0.294129			0	-0.196371	-1.76548
Prkd1			7.33382	6.267	2.1412			1	0.854534	0.291962			0	-0.22679	-1.77615
Gja4			4.67497	3.29116	1.33637			1	0.703996	0.285856			0	-0.506361	-1.80664
Fxyd6			105.194	101.507	29.1497			1	0.96495	0.277104			0	-0.0514732	-1.8515
Gja5			3.37867	2.12098	0.917008			1	0.627756	0.271411			0	-0.671724	-1.88145
Adamts15			3.65069	4.07241	0.956592			1	1.11552	0.26203			0	0.157714	-1.93219
Nts			167.827	151.393	43.7655			1	0.902078	0.260777			0	-0.148676	-1.93911
Ltbp4			5.27509	5.61032	1.33853			1	1.06355	0.253745			0	0.0888874	-1.97855
Smagp			14.3253	12.2348	3.39308			1	0.854069	0.236859			0	-0.227575	-2.0779
Ube2t			4.41323	4.61485	0.973071			1	1.04569	0.22049			0	0.0644488	-2.18122
Pkd2l1			6.49142	5.26951	1.42556			1	0.811765	0.219607			0	-0.300865	-2.18701
Sema3g			2.31128	1.71908	0.499256			1	0.743778	0.216008			0	-0.427055	-2.21084
Depdc1a			3.84814	3.29738	0.82374			1	0.856876	0.214062			0	-0.222841	-2.2239
Col1a2			3.19908	6.85012	0.643612			1	2.14128	0.201187			0	1.09847	-2.31339
Fgl2			24.3708	19.2578	4.64602			1	0.7902	0.190639			0	-0.339711	-2.39109
Paqr4			3.96285	2.11506	0.719971			1	0.533722	0.18168			0	-0.90584	-2.46053
Rdm1			4.48205	3.62088	0.79734			1	0.807862	0.177896			0	-0.307818	-2.49089
Sema3d			6.75654	4.93078	1.16108			1	0.729779	0.171845			0	-0.454469	-2.54082
Ccl21a			6.21098	4.6154	0.925249			1	0.743103	0.14897			0	-0.428365	-2.74691
Fam180a			8.64393	5.62424	1.003			1	0.650658	0.116035			0	-0.620029	-3.10737
Dtx1			5.58008	4.06125	0.534509			1	0.727812	0.0957888			0	-0.458362	-3.384

## Sheet: Panel B
Gene List		David Functional Anotation Clustering High Stringency on
9230102O04Rik,Gata3		All named genes FPKM in ECtrl ≥ 2 and < 2 if FPKM ≥ 2 in E3KO, log2 fold change ≤ -0.5 or ≥ +0.5, q < 0.05 between ECtrl, EfCtrl vs. E3KO
Abcc4
Abcc9
Abcg2
Acadm				Enrichment Score	P Value	Benjamini
Acer2		Mitosis / Cell Division / Cell Cycle Process		13.16	6.2e-15	8.5e-12
Acpp		Condensed Chromosome / Kinetochore		6.07	1.8e-07	6.7e-05
Acsl1		Blood Vessel Development / Morphogenesis		5.47	7.1e-07	0.00019
Acta2		Polysacharide / Glycosaminoglycan Binding		4.21	3.7e-06	0.0026
Ada		Cell Adhesion		3.39	5.5e-05	0.0024
Adamts1
Adamts15
Adamts5
Adamts9
Adarb1
Adcy9
Adrb3
Agl
Agtrap
Ahcyl1
Aif1
Aim2
Ak4
Akr1b10
Aldh5a1
Ammecr1
Ampd3
Ank2
Ankrd49
Anln
Ano3
Anpep
Antxr1
Anxa3
Anxa6
Apba2
Apbb1
Apln
Apod
Apoe
Apoo
Aqp1
Arhgap42
Arhgef10
Arhgef26
Arhgef3
Arhgef39
Armcx4
Arntl
Arrdc3
Art3
Asb13
Asb4
Asf1b
Aspm
Ass1
Atg9b
Atp6v0a1
Atp8a1
Aunip
Aurka
Axl
B3gnt3
Bace2
Bambi
Bcam
Bcar3
Bean1
Bgn
Birc5
Blm
Bmp4
Bmp6
Bora
Bst1
Bub1
C1ql3
C3
Cacna1a
Cadps2
Camk2n1
Car5b
Car8
Casp1
Casp12
Casp4
Cav1
Cbr3
Cbx2
Ccbp2
Ccdc112
Ccdc126
Ccdc166
Ccdc48
Ccdc82
Ccdc99
Ccl2
Ccl21a
Ccl7
Ccna2
Ccnb1
Ccnb2
Ccnf
Ccng1
Cct6a
Cd28
Cd300lg
Cd34
Cd36
Cd52
Cd53
Cd55
Cd59a
Cd68
Cdc42ep3
Cdca2
Cdca3
Cdca5
Cdca7
Cdh13
Cdh2
Cdk1
Cdk18
Cdkn1a
Cdkn2b
Cdkn2c
Cdkn3
Celf2
Celsr1
Cenpa
Cenpe
Cenpf
Cenpi
Cenpl
Cenpn
Cep55
Cep57l1
Ces2b
Ces2e
Ces2g
Cftr
Cgnl1
Chaf1b
Chchd5
Chmp4c
Chst2
Chst7
Cib2
Ckap2l
Clasp2
Clca1
Clca5
Cldn5
Clec14a
Clec4n
Cnga2
Cntln
Col15a1
Col1a2
Copg2
Cplx2
Crlf1
Crmp1
Cryab
Cryz
Csf1
Csf3
Csrp2
Ctdspl
Ctgf
Ctla2a
Ctla2b
Ctps
Ctsh
Ctss
Cx3cl1
Cxadr
Cxcl17
Cxx1b
Cxx1c
Cyp1b1
Cyp39a1
Cyp4b1
Cyp51
Cyr61
Cytip
Dach1
Daglb
Dapk2
Dbc1
Decr1
Dennd2a
Depdc1a
Dhcr24
Diap3
Dixdc1
Dkk2
Dlgap5
Dll4
Dock10
Dock8
Dtd1
Dtnb
Dtx1
Dusp16
Dusp3
Dusp9
Dzip1
Ebf3
Ebpl
Ecm1
Edn1
Ednrb
Eed
Eef1e1
Eef2k
Efemp1
Efhc1
Eif1a
Eif4a-ps4
Eif4a2
Eif5a2
Elovl6
Emcn
Endou
Enpp3
Entpd1
Epb4.9
Ephb1
Ercc6l
Erich1
Esd
Esm1
Esr1
Esrrb
Exoc3l2
Exosc7
Ezh2
F2rl1
F2rl3
Fam101b
Fam110c
Fam115c
Fam134b
Fam167a
Fam180a
Fam189a2
Fam189b
Fam64a
Fam72a
Fam83d
Fam84a
Fancb
Farp1
Fat1
Fbln1
Fbn1
Fcer1g
Fcgr3
Fgf12
Fgl2
Fhl1
Fignl1
Fitm2
Fkbp1b
Fkbp7
Flt1
Fmn1
Fndc4
Foxp2
Frrs1
Fst
Fth1
Fut8
Fxyd6
Fzd1
Gadd45b
Galnt3
Gbp3
Gdf11
Gen1
Gfpt1
Gja4
Gja5
Gjc1
Gm6787,Psmb7-ps2
Gnat2
Golm1
Gp1bb,Sept5
Gp49a,Lilrb4
Gpatch1
Gpr143
Gprc5b
Gpx8
Gsta3
Gstm2
Gsto1
Gtf2e2
H2-K1
H2-M3
H2afx
H2afz
Hbegf
Hcls1
Hdac4
Helz
Heph
Herc6
Hexb
Hey1
Hilpda
Hist1h2ac
Hk2
Hmga2
Hmgb2
Hmgb3
Hmgcll1
Hmmr
Hmox1
Hnrnpa1
Hoxb7,Hoxb8
Hs6st2
Hsd11b1
Hspb8
Hyal1,Hyal3,Nat6
Icam1
Idh2
Idi1
Ier5
Ifi204
Ifitm3
Ifrd1
Ifrd2
Igf2bp3
Igf2r
Igfbp3
Igfbp5
Igsf3
Iigp1
Il13ra1
Il15ra
Il27ra
Il4ra
Il7r
Inhba
Inpp5d
Insig1
Iqgap3
Isca1
Ispd
Itga1
Itga2
Itgam
Itgb2
Itgb5
Itih5
Itpkb
Itpripl2
Jam2
Jund
Kbtbd11
Kbtbd3
Kctd12b
Khdrbs2
Kif11
Kif15
Kif1a
Kif20a
Kif20b
Kif22
Kif2c
Klf11
Klf2
Klhl26
Klhl6
Klra4
Ksr1
Lalba
Lax1
Lcp1
Ldhb
Leprel1
Lfng
Lgals3
Liph
Lmnb1
Loxl4
Lpar6
Lpin1
Lrch2
Lrfn3
Lrrc55
Ltbp1
Ltbp4
Lyplal1
Lysmd2
Lyz2
Maged1
Mageh1
Mak16
Malat1
Mall
Maml3
Man2a1
Mansc1
Maoa
Map3k4
Mapk9
Mapre2
Marcksl1
Mboat7
Mcee
Mcm3
Mcm5
Mdm2
Mef2a
Melk
Mest
Mettl13
Mex3b
Mgll
Mir1900,mmu-mir-1900
Mir5105
Mir5109
Mki67
Mkx
Mmd
Mmp28
Mnd1
Mocos
Morc4
Mpdz
Mpp1
Mrc1
Mreg
Mrpl34
Ms4a6d
Mtap2
Mtdh
Mtss1l
Mttp
Mum1l1
Mxra8
Myo19
Naa16
Naip2
Napepld
Ncapd2
Ncapg2
Ncoa4
Ncs1
Ndc80
Ndufb4
Neil3
Nek2
Nek3
Nes
Neurl3
Nfatc1
Nfix
Nfkbiz
Nid1
Nipal1
Nln
Nlrc3
Nmnat2
Nnmt
Notch2
Notch4
Npr1
Nptx1
Npy
Nrg1
Nrxn2
Nsg1
Nsl1
Ntn1
Nts
Nucb2
Nuf2
Nus1
Nusap1
Ociad2
Ocln
Odc1
Olfml2b
Otud1
Pacsin3
Palld
Palm
Palmd
Papss2
Paqr4
Pcbp3
Pcdh1
Pcdh12
Pcdh17
Pcna
Pcyt1b
Pde1a
Pdgfa
Pdk1
Pdk4
Pdlim7
Pdp2
Pdrg1
Pdzd2
Perp
Pex10
Pex2
Pfn2
Pgf
Pglyrp1
Pgm5
Phf6
Pik3ip1
Pik3r3
Pim1
Pkd2l1
Pkia
Pkm
Pla2g7
Plat
Plce1
Pld5
Plekhg3
Plin2
Plk1
Plscr2
Plscr4
Plxdc2
Pmaip1
Pmf1
Pmp22
Pnck
Podxl
Pole
Pole2
Pon3
Pot1b
Pou2f1
Pou6f1
Pparg
Prc1
Prcp
Prdx6
Prex2
Prim1
Prim2
Prkar1b
Prkcdbp
Prkcz
Prkd1
Prl6a1
Procr
Prox1
Prps2
Prr11
Prrg4
Prss16
Psg22
Pter
Ptgfr
Ptgfrn
Ptgs2
Ptpn21
Ptprf
Ptprn
Ptprs
Pxdc1
Pycr1
Rab34
Rab3d
Rab3il1
Rab6b
Racgap1
Rai14
Rapgef5
Raph1
Rasl11b
Rc3h1
Rcan1
Rcbtb2
Rdm1
Reep1
Reep2
Rerg
Rgs2
Rinl
Ripk3
Rnase1
Rnaseh1
Rnaseh2b
Rnf125
Rnf144b
Rnf150
RP24-170A20.3
Rpa3
Rpl29
Rpl39-ps
Rps13-ps2
Rps24-ps3
Rps6-ps4
Rps6ka4
Rspo3
Rtp4
S100a1
Sarnp
Sc4mol
Scd1
Scgb1a1
Sdpr
Selp
Sema3a
Sema3d
Sema3g
Sema6d
Serpina3g
Serpinb11
Serpinb1a
Serpinb1b
Serpinb6b
Serpinb9b
Serpine1
Serpine2
Sesn1
Sh3pxd2b
Shcbp1
Shroom2
Sigirr
Sipa1l2
Ska3
Slc12a2
Slc16a1
Slc16a2
Slc23a2
Slc24a1
Slc25a33
Slc25a35
Slc2a13
Slc2a9
Slc31a1
Slc35d2
Slc37a2
Slc38a4
Slc39a10
Slc39a8
Slc44a1
Slc45a3
Slc4a11
Slc52a2
Slc7a1
Slc7a11
Slco2a1
Slco2b1
Slfn5
Slit2
Slitrk5
Smagp
Smap2
Smoc1
Snx16
Sorcs1
Sox17
Sp100
Spag5
Spata5l1
Spc25
Spns2
Spp1
Spred3
Sqle
Srcap
Srd5a3
Srgn
Srp72
St5
Stab2
Stac
Stat5b
Stc1
Steap1
Steap2
Stmn2
Stxbp2
Syn2
Syne1
Syne2
Tacc3
Taf7
Tbc1d19
Tbc1d25
Tbc1d30
Tbc1d9
Tbx1
Tfec
Tfpi
Tfpi2
Tgfb1i1
Tgfb2
Tgfb3
Thra
Thy1
Tinagl1
Tjp1
Tll1
Tlr4
Tmem100
Tmem132a
Tmem164
Tmem170
Tmem176a
Tmem176b
Tmem182
Tmem199
Tmem229b
Tmem26
Tmem37
Tmem60
Tmem71
Tmod2
Tmtc1
Tnfaip8l3
Tnfrsf10b
Tnfrsf11a
Tnfrsf26
Tnfsf10
Tnnt3
Tomm5
Top2a
Tpd52l1
Tpm3-rs7
Tpst1
Tpt1-ps3
Tpx2
Tram2
Trib3
Tril
Trp53cor1
Tspan13
Tspan15
Ttc39a
Ttc5
Ttk
Ttyh1
Tub
Tubb2b
Ubash3b
Ube2c
Ube2t
Ubxn10
Uhrf1
Ulbp1
Unc13b
Upp1
Uprt
Vamp5
Vangl2
Wdr5b
Wisp1
Wnt5a
Wnt9a
Xdh
Xrcc6bp1
Zbed3
Zbtb10
Zc3h15
Zdhhc8
Zfp109
Zfp30
Zfp36
Zfp362
Zfp367
Zfp472
Zfp52
Zfp523
Zfp606
Zfp763
Zfp770
Zfp948

## Sheet: Panel C
Genes related to vascular development, morphogenesis, and function within all named genes FPKM in ECtrl ≥ 2 and < 2 if FPKM ≥ 2 in E3KO, log2 fold change ≤ -0.5 or ≥ +0.5, q < 0.05 between ECtrl, EfCtrl vs. E3KO
	Average FPKM					Fold Change vs. ECtrl					Log2 Fold Change vs. ECtrl
Gene	ECtrl	EfCtrl	E3KO			ECtrl	EfCtrl	E3KO			ECtrl	EfCtrl	E3KO
Flt1	5.00557	5.34153	13.9806		Flt1	1	1.06712	2.79301		Flt1	0	0.0937187	1.48182
Sox17	4.61349	3.52751	8.29994		Sox17	1	0.764608	1.79906		Sox17	0	-0.387208	0.847242
Notch4	42.7878	43.4477	64.6362		Notch4	1	1.01542	1.51062		Notch4	0	0.0220803	0.595143
Notch2	12.994	14.7068	8.86538		Notch2	1	1.13181	0.682267		Notch2	0	0.178638	-0.551591
Dll4	9.39339	8.242	5.42706		Dll4	1	0.877426	0.577753		Dll4	0	-0.188651	-0.791475
Lfng	5.5632	5.35219	3.06102		Lfng	1	0.96207	0.550226		Lfng	0	-0.0557856	-0.861903
Hey1	8.67412	5.7047	3.08153		Hey1	1	0.657669	0.355256		Hey1	0	-0.604566	-1.49307
Dtx1	5.58008	4.06125	0.534509		Dtx1	1	0.727812	0.0957888		Dtx1	0	-0.458362	-3.384
Slit2	4.15268	4.70001	17.9535		Slit2	1	1.1318	4.32335		Slit2	0	0.178621	2.11215
Sema6d	8.37059	8.68135	13.4018		Sema6d	1	1.03713	1.60106		Sema6d	0	0.0525901	0.679026
Plxna2	17.7053	19.2962	26.6788		Plxna2	1	1.08985	1.50683		Plxna2	0	0.124135	0.591512
Nrp1	8.01033	7.32687	11.1303		Nrp1	1	0.914678	1.38949		Nrp1	0	-0.128665	0.474559
Sema3a	84.0209	82.0614	46.2374		Sema3a	1	0.976678	0.550308		Sema3a	0	-0.0340445	-0.861688
Ntn1	3.32035	3.12332	1.64694		Ntn1	1	0.94066	0.496014		Ntn1	0	-0.0882549	-1.01155
Sema3g	2.31128	1.71908	0.499256		Sema3g	1	0.743778	0.216008		Sema3g	0	-0.427055	-2.21084
Sema3d	6.75654	4.93078	1.16108		Sema3d	1	0.729779	0.171845		Sema3d	0	-0.454469	-2.54082
Itgam	0.666609	0.946766	2.2063		Itgam	1	1.42027	3.30974		Itgam	0	0.506167	1.72672
Icam1	8.44437	9.95111	27.7184		Icam1	1	1.17843	3.28247		Icam1	0	0.236868	1.71478
Itgb2	2.68821	5.74381	8.50606		Itgb2	1	2.13667	3.16421		Itgb2	0	1.09536	1.66185
Selp	29.4473	33.0849	88.0263		Selp	1	1.12353	2.98928		Selp	0	0.168038	1.5798
Itgb5	1.54729	1.78392	3.7951		Itgb5	1	1.15293	2.45274		Itgb5	0	0.205307	1.29439
Itga2	1.93484	1.95308	4.20457		Itga2	1	1.00943	2.17308		Itga2	0	0.0135368	1.11974
Itga1	4.82793	5.05835	7.46743		Itga1	1	1.04773	1.54671		Itga1	0	0.0672621	0.629207
Gjc1	14.9618	12.9183	7.22429		Gjc1	1	0.863419	0.482849		Gjc1	0	-0.211868	-1.05036
Gja4	4.67497	3.29116	1.33637		Gja4	1	0.703996	0.285856		Gja4	0	-0.506361	-1.80664
Gja5	3.37867	2.12098	0.917008		Gja5	1	0.627756	0.271411		Gja5	0	-0.671724	-1.88145
Tjp1	152.447	159.311	261.153		Tjp1	1	1.04503	1.71307		Tjp1	0	0.0635381	0.776588
Cldn5	240.764	240.813	136.146		Cldn5	1	1.0002	0.565475		Cldn5	0	0.000293586	-0.822465
Ocln	4.91845	4.3078	2.23033		Ocln	1	0.875845	0.453462		Ocln	0	-0.191252	-1.14095
Ets2	71.7806	71.0266	53.7177		Ets2	1	0.989496	0.74836		Ets2	0	-0.0152346	-0.418196
Tbx1	43.1369	39.4003	26.904		Tbx1	1	0.913378	0.623689		Tbx1	0	-0.130716	-0.681102
Prox1	141.35	139.117	78.8761		Prox1	1	0.984202	0.55802		Prox1	0	-0.0229732	-0.841612
Klf2	26.0934	23.0317	12.809		Klf2	1	0.882664	0.49089		Klf2	0	-0.180064	-1.02653
Hbegf	2.45875	3.09718	7.73476		Hbegf	1	1.25966	3.14581		Hbegf	0	0.33303	1.65343
Pdgfa	1.86444	2.08198	5.00146		Pdgfa	1	1.11668	2.68255		Pdgfa	0	0.159214	1.42361
Esm1	43.518	39.9547	92.7331		Esm1	1	0.918119	2.13091		Esm1	0	-0.123247	1.09147
Ctgf	165.301	152.082	320.051		Ctgf	1	0.920031	1.93617		Ctgf	0	-0.120246	0.953206
Wnt5a	6.13678	5.22564	10.6974		Wnt5a	1	0.851528	1.74316		Wnt5a	0	-0.231874	0.801706
Cyr61	40.5725	36.9393	63.3257		Cyr61	1	0.910452	1.5608		Cyr61	0	-0.135346	0.642289
Bmp4	43.2918	42.8209	64.2916		Bmp4	1	0.989123	1.48508		Bmp4	0	-0.0157787	0.570536
Pgf	244.557	249.334	162.295		Pgf	1	1.01953	0.663629		Pgf	0	0.0279089	-0.591552
Fgf12	7.79285	7.44057	4.86984		Fgf12	1	0.954794	0.624911		Fgf12	0	-0.0667379	-0.678277
Tgfb2	18.288	17.2995	11.2365		Tgfb2	1	0.945948	0.614419		Tgfb2	0	-0.080167	-0.702705
Csf3	0.876154	0.752129	3.82199		Csf3	1	0.858444	4.36224		Csf3	0	-0.220204	2.12507
Ccl7	10.8574	10.9201	41.1501		Ccl7	1	1.00577	3.79005		Ccl7	0	0.0083074	1.92222
Ccl2	233.262	228.595	591.317		Ccl2	1	0.979992	2.53499		Ccl2	0	-0.0291575	1.34198
Csf1	28.4152	30.1647	56.4234		Csf1	1	1.06157	1.98568		Csf1	0	0.0861984	0.989631
Cx3cl1	2.73203	2.30917	4.38327		Cx3cl1	1	0.845221	1.6044		Cx3cl1	0	-0.242599	0.682034
Cxcl17	5.30175	5.46765	2.64788		Cxcl17	1	1.03129	0.499435		Cxcl17	0	0.0444523	-1.00163
Ccl21a	6.21098	4.6154	0.925249		Ccl21a	1	0.743103	0.14897		Ccl21a	0	-0.428365	-2.74691
Apoe	1.44001	2.17412	5.39264		Apoe	1	1.5098	3.74486		Apoe	0	0.594353	1.90491
Anpep	3.77286	5.26298	8.84867		Anpep	1	1.39496	2.34535		Anpep	0	0.480221	1.2298
Edn1	94.653	96.2349	193.523		Edn1	1	1.01671	2.04455		Edn1	0	0.023912	1.03178
Hmox1	300.638	299.422	574.597		Hmox1	1	0.995955	1.91126		Hmox1	0	-0.00584715	0.934523
Nus1	55.6382	56.6567	98.1508		Nus1	1	1.01831	1.76409		Nus1	0	0.0261708	0.818924
Cd34	282.354	281.17	475.133		Cd34	1	0.995807	1.68276		Cd34	0	-0.0060624	0.750826
Emcn	1059.78	1021.02	1743.82		Emcn	1	0.963426	1.64545		Emcn	0	-0.0537537	0.718486
Procr	168.313	160.816	250.332		Procr	1	0.955458	1.4873		Procr	0	-0.0657357	0.572696
Egln3	49.3059	51.9054	66.4491		Egln3	1	1.05272	1.34769		Egln3	0	0.0741243	0.430489
Timp2	377.69	372.709	280.178		Timp2	1	0.986812	0.74182		Timp2	0	-0.0191529	-0.430859
Cav1	713.081	675.328	473.012		Cav1	1	0.947057	0.663336		Cav1	0	-0.0784776	-0.592189
Ephb1	25.0959	26.4289	12.8337		Ephb1	1	1.05312	0.511386		Ephb1	0	0.0746647	-0.967515
Thy1	299.724	298.466	146.497		Thy1	1	0.995803	0.488773		Thy1	0	-0.00606802	-1.03276
Npy	48.9709	32.6896	14.6587		Npy	1	0.667531	0.299335		Npy	0	-0.583093	-1.74017
